# Supplementary material for: Decarbonization, Environmental Regulation, and Economic Boom: An Indicator Assessment Based on the Industrial Waste
Source: Frontiers journal article supplement (doi:10.3389/fenrg.2021.838852), 2022-02-03
Supplement: Data_Sheet_2.ZIP [file Calculation process and result of comprehensive index of economic high quality development.xlsx]

## Sheet: calculation process
		Innovation development			Coordinated development			Green development			Open development			Shared developmen
name	year	Population with college degree or above per 10 thousand people	R&D expenditure as a percentage of GDP	R&D personnel accounted for the proportion of employed personnel	Urban-rural income ratio	Proportion of non-agricultural industries	Gini coefficient of GDP per capita	Energy consumption per 10 thousand yuan GDP	Greenery coverage in built-up areas	Carbon emissions per 10 thousand yuan GDP	Total imports and exports as a percentage of GDP	The proportion of foreign capital actually utilized in GDP	Proportion of international tourism revenue in GDP	Number of hospital beds per 10 thousand people	Years of education per capita	Social insurance coverage	Total retail sales of consumer goods per capita
Urumqi City	2000	16427	0.383298	0.262365	2.1342	98.58	0.151235	4.38896	20.01	11.3209	19.4418	0.408202	2.03953	56.6	9.76628	19.8476	6560.21
Urumqi City	2001	23586	0.288783	0.190982	2.29231	98.73	0.245866	4.53711	24.9	11.7289	11.3929	0.397736	1.99309	69.7	14.3999	20.4142	6608.13
Urumqi City	2002	23119	0.373339	0.334287	2.25783	98.57	0.204638	4.35355	26.9	11.4111	11.95	0.364235	1.90648	64.3	14.6284	35.982	7101.44
Urumqi City	2003	29623	0.364504	0.306802	2.19918	98.535	0.205126	4.26755	23.9	11.0709	18.668	0.147469	0.713008	84.03	15.6367	40.1765	6849.51
Urumqi City	2004	29759	0.395593	0.287807	2.1652	98.5	0.200699	4.18347	25.3	10.8717	28.2458	0.364052	0.82829	95.24	15.9296	43.353	7948.24
Urumqi City	2005	31444	0.348252	0.299539	2.54494	98.5	0.212049	4.13926	25.4	10.8754	34.8506	0.368153	0.912428	76.54	16.2562	45.497	8732.61
Urumqi City	2006	37392	0.30632	0.230245	2.24248	98.7	0.220132	4.00641	21.21	10.6812	29.1166	0.958367	1.06753	92.97	16.9878	39.5981	9541.27
Urumqi City	2007	39241	0.295645	0.24611	2.00865	98	0.241174	3.75207	25.47	10.067	34.9912	1.01432	0.981415	95.47	17.0835	42.5951	9485.56
Urumqi City	2008	46619	0.590798	0.284844	2.0157	98.2	0.269078	3.67855	24.22	10.1694	35.5912	0.139671	0.607216	90.77	18.4665	46.9961	10400.2
Urumqi City	2009	63024	0.632255	0.386792	1.96145	98.5	0.143895	3.37479	34.25	9.84836	23.1342	0.880584	0.559983	99.67	21.8825	44.2226	12259.5
Urumqi City	2010	69874	0.611058	0.385175	1.92633	98.5	0.163007	3.33306	34.8	9.86527	30.2706	0.254795	0.988582	80.19	22.5962	48.4972	11686.4
Urumqi City	2011	63112	0.574771	0.417835	1.9026	98.7	0.270326	3.35187	36.2	9.87327	34.5093	0.447215	0.590796	106.4	20.9692	55.3079	13063.7
Urumqi City	2012	62160	0.691644	0.512551	1.83264	98.7	0.294231	2.92585	37	8.76991	32.7872	0.554143	0.626139	102.86	20.0359	56.7255	14071.5
Urumqi City	2013	63458	0.821469	0.504875	1.85317	98.8	0.293829	2.49278	37.9	7.53153	21.9315	0.500414	0.591007	102.65	19.6078	58.4006	15918.5
Urumqi City	2014	63759	0.873959	0.454327	2.02089	98.9	0.298424	2.42906	38.5	7.12911	20.6735	0.456886	0.349733	107.76	19.7584	59.1063	17138.9
Urumqi City	2015	58765	0.881677	0.439741	2.10595	98.8	0.280416	2.02281	40.3	5.8143	13.8264	0.569777	0.420512	109.81	18.737	60.4633	18137.9
Urumqi City	2016	56724	1.01233	0.454939	2.091	98.9	0.304404	1.7234	40.9	5.0239	13.2387	0.068859	1.02754	109.773	18.0845	58.7935	22380.9
Urumqi City	2017	56878	0.833575	0.385547	2.07568	99.1	0.311647	1.86514	41.8	5.4975	16.8385	0.0192451	1.06246	138.474	22.1146	85.5753	23383.4
Urumqi City	2018	56777	0.87756	0.403552	2.04357	99.2	0.298748	1.79764	41.9	5.36613	16.565	0.00288199	0.418764	144.794	22.2073	93.3942	22552.5
Karamay City	2000	1287	1.23055	0.711126	2.66325	99.63	0.259001	9.04976	25.49	20.4293	2.7645	0	0.00896014	53.3	9.63187	72.6415	3899.44
Karamay City	2001	471	0.968221	0.725275	3.1787	99.7	0.483975	8.99391	39.6	20.2167	2.75797	0	0.00289481	51.5	7.84777	97.9487	3167.97
Karamay City	2002	674	1.02095	0.707143	2.45636	99.68	0.315508	8.7428	31.1	19.826	2.43583	0	0.0028791	56.2	7.83679	59.0625	3518.09
Karamay City	2003	610	0.59837	0.903185	2.2539	99.69	0.300147	8.93187	34	20.1357	2.64494	0.0229629	0.00179876	61.01	8.96041	83.7895	2730.78
Karamay City	2004	522	0.852307	1.22965	2.21118	99.7	0.411777	9.38284	36.5	21.1929	1.81854	0	0.00465253	73.58	9.32033	78.7209	2351.54
Karamay City	2005	630	0.97349	1.48626	2.00847	99.6	0.550915	9.52788	36.5	21.4422	1.66032	0.000849485	0.00759227	72.76	10.1022	75.185	2186.94
Karamay City	2006	1285	0.828473	1.26925	2.02389	99.6	0.569498	8.5394	39.81	18.7771	1.18754	0	0.00421114	74.15	11.5701	72.5356	1879.86
Karamay City	2007	2256	0.858716	1.30823	1.99568	99.5	0.592003	7.89728	42.83	17.3799	1.72176	0.00044284	0.00280465	59.21	13.6476	64.509	2072.67
Karamay City	2008	2373	0.634386	1.00298	1.94897	99.5	0.612024	7.70653	42.26	16.8806	1.29206	0	0.00252088	68.87	13.9369	64.2766	1649.84
Karamay City	2009	2358	1.16415	1.46504	1.9547	99.3	0.507996	8.40484	42.77	18.5571	2.57728	0	0.00298675	66.67	13.9129	72.0354	2931.62
Karamay City	2010	1874	0.783942	1.3596	1.67982	99.5	0.545074	9.06282	42.9	20.425	2.66534	0	0.0041872	46.8	13.5934	74.693	2575.49
Karamay City	2011	1604	0.748007	1.34874	1.68451	99.4	0.563878	9.2713	42.91	20.6526	3.77754	0.120848	0.00362544	65.11	13.012	77.5646	2780.14
Karamay City	2012	1402	1.25467	0.88521	1.70256	99.4	0.596856	9.08146	42.92	20.2691	1.86067	0.133929	0.00973319	57.66	12.3544	90.4268	3319.73
Karamay City	2013	1533	0.699466	0.846024	1.61905	99.4	0.6127	9.22288	42.93	20.5099	5.65356	0.12644	0.0118379	56.93	12.5785	94.9688	3944.33
Karamay City	2014	1611	1.12263	0.814283	1.73841	99.4	0.668168	9.61201	43.04	21.3799	3.70672	0	0.0176083	60.14	12.4083	94.7255	4336.6
Karamay City	2015	1465	1.15691	0.783893	1.75642	99.2	0.543658	8.371	43.33	18.6612	0.942049	0	0.0332418	59.39	11.9325	94.2951	7133
Karamay City	2016	1674	0.812818	0.672587	1.72902	99.1	0.625715	8.62375	43.08	19.4244	1.40918	2.53607	0.0396696	62.2003	12.4775	82.7047	8377.95
Karamay City	2017	1737	0.772769	0.746	1.71844	99.3	0.60746	7.92617	43.05	17.8809	0.830248	0	0.0445472	66.363	12.5704	90.5883	7017.61
Karamay City	2018	2707	0.616675	0.670796	1.70122	99.4	0.605018	7.46737	43.29	17.0732	0.981328	0	0.0331554	68.8658	13.7683	97.9202	5774.39
Turpan City	2000	358	0.0489973	0.0168923	3.05223	87.52	0.341674	1.54006	31.24	3.69804	1.59509	0.0332021	0.949028	31.2	7.58834	10.6495	1591.65
Turpan City	2001	297	0.0497713	0.0190661	2.80152	89.04	0.340104	1.0761	32.1	2.66049	0.592327	0	0.795123	31.9	7.72518	10.1843	1549.2
Turpan City	2002	720	0.0534524	0.0290655	2.86291	89.06	0.312768	0.882968	39.4	2.28908	0.213895	0.12496	0.571506	34.6	7.99259	11.3729	2529.75
Turpan City	2003	785	0.0512971	0.0232941	2.66755	88.88	0.326947	0.80714	43.2	2.14339	0.343712	0.109757	0.227206	36.22	7.79188	11.5901	1535.92
Turpan City	2004	433	0.0152248	0.0121728	2.16152	88.7	0.337914	1.16155	43.2	2.77943	0.458926	0	0.949074	34.19	7.64407	11.6252	2166.92
Turpan City	2005	361	0.0103528	0.0106476	2.04389	89.6	0.358583	1.36982	43.5	3.21842	0.138838	0.346069	0.44937	34.6	7.39822	11.6623	2239.18
Turpan City	2006	216	0.096676	0.0765938	2.0655	90.7	0.349529	1.49898	22.41	3.60461	0.225342	0	0.595356	34.12	7.05139	13.4118	2318.04
Turpan City	2007	234	0.127945	0.142317	2.09324	90.4	0.334395	1.89447	30	5.03763	0.244881	0.0167969	1.09578	32.8	6.53103	12.6641	2260.73
Turpan City	2008	164	0.187897	0.0350533	2.16166	90.7	0.326579	2.2226	29.95	6.02191	0.261959	0.0517706	0.35066	33.65	6.27395	13.6491	2342.31
Turpan City	2009	1013	1.05909	0.0723339	2.25281	86.9	0.205932	2.36418	29.975	6.55872	0.473738	0.0251894	0.443246	33.01	6.33814	26.3308	3325.37
Turpan City	2010	718	0.81531	0.0848221	2.48164	86.6	0.196242	3.36109	25.5825	9.43347	0.344796	0	1.43807	34.32	6.04141	29.0292	3441.15
Turpan City	2011	926	0.841281	0.0850986	2.53335	87.8	0.222064	4.0453	21.19	11.5512	0.8908	0	1.15506	35.8	5.93423	37.2621	2728.33
Turpan City	2012	1048	1.15299	0.177745	2.4753	86.1	0.211376	4.17333	17.75	12.1618	0.897129	0.0778082	0.896091	38.46	6.11272	41.7464	3008.63
Turpan City	2013	726	1.11681	0.224247	2.441	84.7	0.209899	4.44591	33.76	12.9636	2.2024	0.0819309	0.344822	45.17	5.7432	40.809	3226
Turpan City	2014	778	0.928773	0.197323	2.39985	83.8	0.186426	3.83986	36.01	11.6195	0.883967	0.00188983	0.296231	48.69	5.61826	39.6625	3951.33
Turpan City	2015	946	0.976956	0.160104	2.5062	78	0.0771677	3.09469	40.31	9.5979	1.25389	0.154647	0.359449	52.06	5.60189	35.1335	5974.98
Turpan City	2016	909	0.749472	0.156567	2.51212	77.4	0.0983712	3.65814	40.82	11.46	0.643435	0	0.421065	55.4923	6.04281	33.4658	6299.03
Turpan City	2017	617	0.456526	0.140065	2.49796	82.3	0.135119	4.66964	38.49	15.0381	0.234128	0	0.441962	62.3254	6.01694	79.4193	6307.71
Turpan City	2018	756	0.267097	0.11815	2.46175	84	0.154777	4.55665	39.655	15.2068	0.691155	0.00191751	0.400759	62.3619	6.30524	90.1695	6180.27
Hami City	2000	641	0.0183324	0.0227378	3.74423	80.3	0.161807	1.96661	35.03	5.82532	10.7433	0.141972	0.0171345	47	8.584	17.6798	2333.51
Hami City	2001	418	0.045712	0.00977778	2.24742	82.34	0.148802	1.91815	35.6	5.86242	12.4407	0.0245687	0.0363617	46.3	8.11189	20.3111	2431.97
Hami City	2002	746	0.0429369	0.0117008	3.65166	83.49	0.134843	2.01739	36.2	6.0766	6.74211	0.0287598	0.0467346	47.7	8.9433	17.8855	2544.95
Hami City	2003	782	0.0385699	0.00868432	3.30397	82.845	0.130429	2.08424	36.8	6.32244	8.46341	0.0138801	0.00211672	44.96	8.91789	19.3009	2580.12
Hami City	2004	665	0.0213889	0.00954033	3.08001	82.2	0.127557	2.43578	38.6	7.5089	4.5554	0.170709	0.0933684	49.98	9.96179	21.9428	2948.8
Hami City	2005	306	0.0115208	0.00399113	2.9046	84	0.173518	2.40872	34.9	7.26005	3.20756	0.108711	0.421474	45.62	9.73952	24.9446	2757.17
Hami City	2006	304	0.021382	0.0109991	2.76221	84.8	0.189308	2.5501	34.87	7.72797	5.62494	0.373764	0.4785	46.86	9.78769	30.2933	3075.32
Hami City	2007	254	0.02772	0.0170743	2.66862	84.5	0.188356	2.33587	37.71	7.12499	4.95382	0.0553823	0.302536	49.2	9.62013	30.5953	3500.93
Hami City	2008	234	0.0118995	0.0290568	2.25568	86.1	0.36343	2.24291	40.18	6.77799	3.45788	1.20572	0.240815	50.97	9.2848	31.7836	3521.6
Hami City	2009	563	0.120553	0.0844521	2.25483	84.5	0.192298	2.71055	41.38	8.03635	3.24473	0.240603	0.220684	50.42	9.22574	23.2193	4384.58
Hami City	2010	622	0.0776322	0.0774244	2.25346	85.6	0.183871	2.66269	41.12	7.95291	0.87235	0.922903	0.368838	53.37	8.92833	26.0076	4535.3
Hami City	2011	537	0.0733151	0.0920774	2.19317	86.9	0.193127	2.7793	42.65	8.50559	0.764525	0.588231	0.288268	59.45	8.35519	35.0983	4975.33
Hami City	2012	558	0.0740685	0.0718719	2.19979	87.7	0.236449	3.30469	43.37	9.81075	0.617489	0.54901	0.284742	58.44	8.75428	35.814	5861.91
Hami City	2013	1005	0.0936661	0.0648002	2.10587	88.8	0.287058	5.3847	42.94	15.6389	1.51381	0.305767	0.201124	59.66	8.96153	36.3388	6599.1
Hami City	2014	1069	0.0585903	0.0609533	2.12299	90.5	0.326512	8.26147	40.57	23.8071	6.18069	0.214734	0.0940795	61.06	8.83806	36.5442	7477.21
Hami City	2015	1179	0.107933	0.0556449	2.16006	90.7	0.314311	5.79728	38.09	16.8032	6.37247	0.494714	0.109675	65.43	8.93962	37.3894	8755.33
Hami City	2016	1039	0.168128	0.0623095	2.13876	90.4	0.331035	6.31919	39.23	18.2838	8.97993	0.00723751	0.131755	54.7187	9.82445	33.1249	10127.8
Hami City	2017	855	0.10237	0.0594005	2.1383	91.9	0.341939	5.39138	39.08	15.7065	1.62784	0.0116797	0.117782	55.3912	9.86019	67.4982	10000.4
Hami City	2018	951	0.121994	0.0584327	2.12642	92.4	0.354257	6.65163	39.155	19.0944	1.58551	0.062646	0.00554935	56.8824	9.68005	71.0881	9981.33
Changji Hui Autonomous Prefecture	2000	2010	0.0251545	0.013527	1.78117	63.9	0.185692	1.9931	30.35	5.93163	13.4872	0.21349	0.00414544	32	7.96935	20.5056	1882.85
Changji Hui Autonomous Prefecture	2001	830	0.0550571	0.0094846	1.79595	67.82	0.188445	1.76712	26.1	5.2754	6.17739	0.126878	0.00387441	32.8	7.70976	13.1439	1977.97
Changji Hui Autonomous Prefecture	2002	1680	0.0175959	0.0111301	1.77161	68.09	0.19165	1.65345	30.9	4.91189	12.4722	0.00606839	0.0033983	36.2	8.54876	17.2673	2163.41
Changji Hui Autonomous Prefecture	2003	2497	0.0464293	0.0156936	1.62542	68.845	0.175416	1.59504	32.7	5.05237	20.2512	0.385052	0.00291692	38.55	8.99274	15.8675	2142.74
Changji Hui Autonomous Prefecture	2004	3384	0.0146822	0.010256	1.53915	69.6	0.184094	1.85746	32.6	5.80598	12.1299	0.155447	0.00320267	43.36	9.78329	18.9133	2753.78
Changji Hui Autonomous Prefecture	2005	2993	0.0267072	0.0121889	1.66681	68.5	0.187182	1.64063	34	4.88125	24.226	0.128884	0.00188769	44.61	9.84276	19.3385	2959.4
Changji Hui Autonomous Prefecture	2006	4589	0.53108	0.0659641	1.67886	70	0.186153	1.63917	31.71	4.90676	35.7792	0.119858	0.00404017	44.14	10.4116	19.5837	3341.05
Changji Hui Autonomous Prefecture	2007	6496	0.232558	0.0586877	1.92901	68.9	0.196462	1.74843	34.86	5.22628	58.3336	0.154897	0.000485569	49.03	11.5217	21.0361	4123.16
Changji Hui Autonomous Prefecture	2008	7922	0.151385	0.0548201	1.8377	69.9	0.190227	2.12747	38.58	6.30703	64.866	1.01828	0.000357857	57.88	11.9096	23.0216	4661.65
Changji Hui Autonomous Prefecture	2009	7130	0.245776	0.0737063	1.84995	70.2	0.173531	2.46709	38.81	7.30875	34.8146	0.450676	0.000460814	60.47	11.7701	36.8112	5632.28
Changji Hui Autonomous Prefecture	2010	7154	0.356472	0.0691141	1.58849	70.2	0.177706	2.90606	38.81	8.48442	25.1883	0.299779	0.00545936	62.35	11.2824	39.7297	5799.19
Changji Hui Autonomous Prefecture	2011	9894	0.410446	0.0694283	1.50628	72.9	0.173046	3.41489	35.67	9.961	19.4182	0.333444	0.0137825	66.14	12.4487	36.7003	6283.64
Changji Hui Autonomous Prefecture	2012	10040	0.461939	0.121238	1.50541	73.5	0.166739	3.24677	39.12	9.71574	16.2667	0.321891	0.0407183	70.82	12.5295	37.5108	7160.33
Changji Hui Autonomous Prefecture	2013	10151	0.533243	0.096939	1.54534	74.5	0.13687	4.08167	39.12	13.1982	10.4211	0.295933	0.0315962	70.25	12.7556	39.0484	8533.1
Changji Hui Autonomous Prefecture	2014	9837	0.305549	0.0805723	1.57194	77.3	0.1656	4.45508	39.15	14.8676	8.27981	0.352956	0.028255	69.67	12.1488	40.317	10188
Changji Hui Autonomous Prefecture	2015	11296	0.348111	0.0646821	1.65394	78.1	0.151382	4.52215	39.26	15.6644	7.77965	0.196482	0.0412957	71.15	12.8405	41.3976	11843.9
Changji Hui Autonomous Prefecture	2016	10047	0.419904	0.0676914	1.70053	80	0.15021	4.40112	37.79	15.547	6.77564	0.104271	0.0488101	64.0971	12.1272	30.9283	13531.5
Changji Hui Autonomous Prefecture	2017	10390	0.633841	0.0785954	1.74411	82.4	0.160121	4.32918	39.79	15.1014	3.63418	0.0416164	0.0559611	65.9128	12.011	66.6873	14734.7
Changji Hui Autonomous Prefecture	2018	10517	0.530482	0.0636412	1.79155	83.5	0.194041	4.13186	38.79	14.1992	4.36995	0.00745321	0.0788395	69.1325	12.1562	71.3226	14033.2
Counties (Cities) Direct Under Ili Prefecture	2000	2373	0.0882125	0.0180213	2.01358	58.51	0.22751	0.998443	42.79	3.01228	35.7785	0.00784862	0.142396	28.8	7.74085	13.7147	1257.73
Counties (Cities) Direct Under Ili Prefecture	2001	3112	0.0432956	0.0154302	2.60175	64.05	0.226355	1.25456	31.7	3.77241	14.0312	0.0481376	0.195073	31.7	2.43638	14.2386	1162.81
Counties (Cities) Direct Under Ili Prefecture	2002	3398	0.0369192	0.0187661	2.30263	65.36	0.211385	1.31692	39.7	3.94541	20.8955	0	0.127551	33.5	7.06939	15.0088	1305.61
Counties (Cities) Direct Under Ili Prefecture	2003	3311	0.063158	0.0255527	2.40639	67.83	0.207015	1.16662	40.1	3.50027	58.7919	0.0106831	0.100293	34.06	7.32123	15.4365	1163.67
Counties (Cities) Direct Under Ili Prefecture	2004	3270	0.0626252	0.0267417	2.44953	70.3	0.212109	1.23415	40.1	3.73879	58.3462	0.32548	0.20942	34.16	7.44592	16.1585	1382.33
Counties (Cities) Direct Under Ili Prefecture	2005	3555	0.116898	0.0298001	2.27711	73.1	0.275369	1.48239	39.59	4.43868	90.8637	0.24348	0.416934	34.35	7.65854	16.7132	1407.42
Counties (Cities) Direct Under Ili Prefecture	2006	3452	0.0577599	0.0281339	2.24771	74.7	0.281539	1.80574	39.88	5.38951	90.2745	0.08493	0.162139	35.6	7.67448	17.4421	1543.31
Counties (Cities) Direct Under Ili Prefecture	2007	3321	0.0601724	0.0268162	2.33901	74.9	0.288855	1.78456	40.46	5.4431	83.366	0.0559518	0.122837	37.72	7.53374	18.9191	1657.32
Counties (Cities) Direct Under Ili Prefecture	2008	4590	0.0595742	0.0292926	2.37136	76.7	0.291419	1.68808	38.11	5.21743	151.541	0.122813	0.193639	39.54	7.6335	19.7485	1821.36
Counties (Cities) Direct Under Ili Prefecture	2009	6481	0.135407	0.0472356	2.43939	75.8	0.293933	1.84912	39.03	5.83561	75.899	0.407821	0.210052	43.18	7.82602	15.779	2121.72
Counties (Cities) Direct Under Ili Prefecture	2010	7846	0.0982383	0.0425163	2.43952	75.8	0.284499	2.09963	39.08	6.62641	80.9808	0.979614	0.738524	50.24	7.76164	15.9744	2200.6
Counties (Cities) Direct Under Ili Prefecture	2011	5991	0.0956609	0.0466552	2.24309	76.6	0.300798	2.00075	39.3	6.36372	72.7787	0.209875	2.2194	48.14	7.26762	27.7412	2374.13
Counties (Cities) Direct Under Ili Prefecture	2012	6498	0.159182	0.049325	2.23154	76.3	0.302786	2.01073	39.51	6.3744	62.4049	0.204692	2.15162	52.91	7.21958	28.1599	2709.3
Counties (Cities) Direct Under Ili Prefecture	2013	7196	0.311306	0.0716098	2.17523	76.3	0.297871	2.63997	41.15	8.24609	68.2522	0.164907	2.17844	54.58	7.17412	28.1254	2943.38
Counties (Cities) Direct Under Ili Prefecture	2014	6769	0.158053	0.0590565	2.1998	76.1	0.26383	2.73582	41.23	8.7471	65.4536	0.0677668	2.06627	55.8	7.06955	28.0642	3318.04
Counties (Cities) Direct Under Ili Prefecture	2015	7625	0.206518	0.0489227	2.28562	76.8	0.247155	1.79019	37.63	5.69482	36.1417	0.179722	2.29667	59.71	7.10158	28.2574	3623.91
Counties (Cities) Direct Under Ili Prefecture	2016	7556	0.27729	0.0620505	1.84829	76.2	0.249099	1.79589	37.49	5.77778	38.3415	0.711053	3.16365	50.1614	7.15583	19.4764	4382.55
Counties (Cities) Direct Under Ili Prefecture	2017	8533	0.149066	0.0604541	2.29788	80.4	0.259106	1.76325	36.27	5.72329	39.0744	1.19726	3.46425	52.3089	7.68548	60.2131	4737.33
Counties (Cities) Direct Under Ili Prefecture	2018	9598	0.153484	0.0567403	2.28716	81.2	0.316051	1.61945	36.88	5.33426	37.4897	0.192428	6.51135	54.122	8.0326	71.6361	4932.34
Tarbagatai Administrative Offices	2000	873	0.00476377	0.00741982	2.10345	62.82	0.154255	0.609516	32.31	1.84474	21.265	0.00988381	0.00593028	32.6	8.15274	21.151	1524.15
Tarbagatai Administrative Offices	2001	515	0.00431262	0.00546695	1.92759	62.83	0.133496	0.597269	32.2	1.82159	19.1296	0	0.0126647	31.3	8.0155	40.2105	1642.77
Tarbagatai Administrative Offices	2002	720	0.00185834	0.00461957	1.8516	63.02	0.131128	0.714221	31.2	2.16785	15.4187	0	0.00777168	32.5	8.28222	24.0421	1768.78
Tarbagatai Administrative Offices	2003	787	0.0020783	0.00236686	1.57849	63.01	0.125323	0.751356	34.2	2.25071	50.4759	0	0.002738	30.92	8.3589	17.3669	1177.09
Tarbagatai Administrative Offices	2004	252	0.00277732	0.00234375	2.31915	63	0.111541	0.770433	34.3	2.33468	29.9742	0	0.0302156	33.19	8.43962	17.3633	1191.74
Tarbagatai Administrative Offices	2005	389	0.0141004	0.00796591	2.54425	59	0.102754	0.671311	34.2	2.08379	35.9553	0	0.0758811	33.05	8.54192	16.1541	1458.81
Tarbagatai Administrative Offices	2006	122	0.00238313	0.0025436	1.92777	60.4	0.117051	0.704432	29.96	2.18907	26.2322	0.0403704	0.108763	35.93	8.47319	16.4608	1571.15
Tarbagatai Administrative Offices	2007	80	0.00470791	0.00470588	1.94885	63.3	0.104778	0.704309	35.8	2.21685	30.2125	0.00559359	0.0149162	36.95	8.51711	15.1674	1683.64
Tarbagatai Administrative Offices	2008	188	0.0136287	0.00373665	2.29446	66.4	0.117752	0.607316	38.19	1.95697	26.7817	0.00717873	0.0300443	39.33	8.30109	15.4982	1822.5
Tarbagatai Administrative Offices	2009	581	0.176639	0.0612281	2.20675	63.7	0.125611	0.526088	38.48	1.68235	20.0796	0.0268617	0.0247032	39.97	8.12632	27.8772	2134.57
Tarbagatai Administrative Offices	2010	667	0.119328	0.0466216	1.57421	63	0.151118	0.764539	38.62	2.42121	12.9003	0	0.104739	36.1	7.88144	28.1926	2087.27
Tarbagatai Administrative Offices	2011	814	0.124066	0.0578169	1.54001	64.9	0.140759	0.812527	39.13	2.52682	8.30316	0	0.094508	43	7.84961	29.5695	2415.73
Tarbagatai Administrative Offices	2012	691	0.0228328	0.0182708	1.67745	64.8	0.156217	0.899526	39.35	2.78205	5.81911	0.0876333	0.0875035	46.74	7.81301	30.1406	2710.75
Tarbagatai Administrative Offices	2013	766	0.0380911	0.0205854	1.71278	65.3	0.128629	0.862449	40.94	2.6692	13.6753	0.0441646	0.107615	48.5	7.53606	30.7095	3147.28
Tarbagatai Administrative Offices	2014	999	0.0706088	0.0222849	1.73978	65.1	0.148282	0.895904	40.67	2.74441	9.07695	0.0686488	0.0977005	52.4	7.33243	31.2712	3633.76
Tarbagatai Administrative Offices	2015	1040	0.0586896	0.0239253	1.84768	63.9	0.119613	0.604943	41.89	1.87389	4.04247	0.000209966	0.127134	57.11	7.57767	32.34	4739.96
Tarbagatai Administrative Offices	2016	997	0.0491286	0.0223716	1.74267	61.5	0.108153	0.589881	40.475	1.73624	6.70201	0.931211	0.16974	52.7977	7.47997	21.2447	5583.04
Tarbagatai Administrative Offices	2017	862	0.0410627	0.0216208	1.82268	65.8	0.114572	0.668528	39.06	1.9032	9.50315	0	0.190934	53.7463	7.24472	65.5062	6132.3
Tarbagatai Administrative Offices	2018	1001	0.0535303	0.0226897	1.76766	62.2	0.137499	0.604192	39.7675	1.76499	6.13496	0.0753113	0.289218	58.6801	7.45563	77.8953	5966.55
Altay Administrative Offices	2000	412	0.0141256	0.0105335	2.88583	62.47	0.101819	0.73511	34.03	2.35418	24.1312	0.0157669	0.128763	41.7	8.24921	21.3516	1697.26
Altay Administrative Offices	2001	347	0.00606835	0	2.60301	63.33	0.11222	0.68385	34.4	2.21983	15.2945	0	0.0926713	39.4	8.0649	24.6169	1793.19
Altay Administrative Offices	2002	509	0.00814892	0.00200463	2.56188	64.78	0.115131	0.644583	35.2	2.07986	14.8071	0.153867	0.201945	36.3	8.42649	21.6808	1927.02
Altay Administrative Offices	2003	529	0.00860118	0.00289981	2.30894	66.54	0.135482	0.526005	35.4	1.71112	61.2288	0	0.128565	33.19	8.36926	23.7937	2369.87
Altay Administrative Offices	2004	638	0.0157831	0.00694306	2.52738	68.3	0.177262	0.458269	35.9	1.50875	20.7707	0	0.178055	36.68	8.44579	24.4023	2279.83
Altay Administrative Offices	2005	93	0.0738667	0.018491	2.35166	68.9	0.15908	0.574825	35.9	1.90735	6.11998	0	0.288658	31.84	8.01558	25.5493	2601.87
Altay Administrative Offices	2006	234	0.00905544	0.00526364	2.51885	75.5	0.244991	0.504825	34.77	1.73203	2.89939	0	0.177009	34.38	7.90056	29.3448	2577.8
Altay Administrative Offices	2007	304	0.00271957	0.000844573	2.85664	78	0.266856	0.639743	33.71	2.1559	4.10682	0	0.140928	35.95	7.49482	27.9765	2703.65
Altay Administrative Offices	2008	211	0.00399502	0.00157917	2.96906	78.9	0.287702	0.683107	35.97	2.2771	16.4987	1.23971	0.0891407	38.21	7.18485	28.9186	2816.48
Altay Administrative Offices	2009	692	0.0414012	0.0352529	2.99643	76.4	0.215599	0.733303	35.5	2.43954	27.1744	0.0226948	0.0762312	41.55	6.80659	24.7994	3283.21
Altay Administrative Offices	2010	1286	0.0208605	0.0222935	2.57641	78.1	0.220057	0.831446	37.48	2.74715	34.4317	2.03139	0.367928	47.17	6.8827	25.8057	3479.33
Altay Administrative Offices	2011	2004	0.0200689	0.0260424	2.72736	80	0.235653	0.96792	45.67	3.19918	33.8875	0.349819	0.495741	46.52	6.80083	37.6343	3643.74
Altay Administrative Offices	2012	2201	0.0373082	0.0328796	2.64616	80.1	0.254067	0.553939	18.13	1.98377	30.5084	0.426525	0.677205	51.13	7.18739	38.6702	4083.5
Altay Administrative Offices	2013	2044	0.0459949	0.0279969	2.53571	80.4	0.209732	0.663198	16.03	2.02765	32.571	0.415913	1.0574	54.29	6.98533	39.0993	4587.33
Altay Administrative Offices	2014	1753	0.0505461	0.0297093	2.47864	80.7	0.190021	1.12885	37.5	3.12519	42.1906	0.437778	0.984457	55.84	6.66782	38.5738	5168.71
Altay Administrative Offices	2015	1598	0.0661252	0.0323537	2.50379	79	0.151437	0.763739	37.69	2.02737	24.2907	0.397547	1.29217	63.83	6.81018	38.5976	6184.91
Altay Administrative Offices	2016	859	0.0827015	0.028134	2.41789	77.3	0.136579	0.980031	38.185	2.58196	29.0139	0	1.57279	50.2976	6.49551	28.7656	7720.7
Altay Administrative Offices	2017	791	0.0364952	0.0242065	2.51801	82.4	0.135489	1.14748	38.68	3.04665	29.7943	0	1.74557	52.561	6.46994	69.6995	7793.27
Altay Administrative Offices	2018	874	0.0515476	0.0249732	2.10277	81.9	0.135364	1.1674	38.4325	3.10313	22.2275	0	0.510349	52.6156	6.70797	77.473	7697.93
Bortala Mongolian Autonomous Prefecture	2000	321	0.0322289	0.0125457	1.89826	57.47	0.0862891	0.792375	27.1	2.39093	160.805	0.0664241	0.0184511	36.8	8.13768	12.1309	1461.54
Bortala Mongolian Autonomous Prefecture	2001	380	0.0619097	0.0158631	1.91753	60.34	0.0813562	0.764326	28.6	2.28734	137.603	0	0.00849549	37.1	8.92091	13.4581	1626.81
Bortala Mongolian Autonomous Prefecture	2002	797	0.0547885	0.0185	2.16552	61.75	0.0829747	0.783955	32.8	2.34288	229.043	0	0.0120325	39.1	9.2513	12.925	1807.22
Bortala Mongolian Autonomous Prefecture	2003	372	0.109062	0.0214286	1.94959	60.575	0.0754746	0.702479	34.7	2.11046	283.178	0.00491936	0.000885485	38.47	8.53063	13.648	1509.47
Bortala Mongolian Autonomous Prefecture	2004	100	0.0884576	0.0175879	1.87175	59.4	0.0795296	0.8712	35.9	2.66425	361.898	0	0.0176614	42.75	8.20815	14.6281	1679.51
Bortala Mongolian Autonomous Prefecture	2005	141	0.0468808	0.0213489	1.87966	69.1	0.199862	0.749037	36.5	2.3073	255.062	0.0265869	0.01641	40.91	8.74898	15.0898	1516.88
Bortala Mongolian Autonomous Prefecture	2006	136	0.0714028	0.029731	1.82087	69.8	0.190435	0.534275	34.69	1.62157	201.436	0	0.0353389	45.17	8.75353	15.9981	1524.42
Bortala Mongolian Autonomous Prefecture	2007	224	0.0982589	0.0704556	1.89341	68	0.18371	0.609394	30.72	1.86491	168.948	0	0.015792	42.95	8.61409	17.5669	1596.38
Bortala Mongolian Autonomous Prefecture	2008	625	0.0150758	0.0194444	1.95656	70.9	0.193307	0.714965	33.53	2.20954	173.208	0.861243	0.029128	45.11	8.62782	18.2407	1815.58
Bortala Mongolian Autonomous Prefecture	2009	647	0.017532	0.0614679	1.92294	69.9	0.184971	0.898602	35.14	2.75784	74.2158	0.156298	0.0243581	45.05	8.4844	17.3707	2043.26
Bortala Mongolian Autonomous Prefecture	2010	657	0.015646	0.0624008	1.79444	62.4	0.161648	0.952323	33.76	2.93971	31.4374	0	0.285303	50.76	7.94747	20.2759	1833.87
Bortala Mongolian Autonomous Prefecture	2011	520	0.00863498	0.0669829	1.79712	65.3	0.174798	0.832178	33.6	2.5658	68.7604	0	0.341886	54.24	7.4939	29.0078	2048.45
Bortala Mongolian Autonomous Prefecture	2012	584	0.0102103	0.0489431	1.81365	69.2	0.180181	0.747191	28.63	2.36807	83.6735	0	0.30984	57.01	7.69616	29.6864	2319.2
Bortala Mongolian Autonomous Prefecture	2013	224	0.0422378	0.0501628	1.77351	72.9	0.179762	0.901413	31.07	2.83998	75.2512	0	0.257677	59.24	7.24374	29.3054	2730.57
Bortala Mongolian Autonomous Prefecture	2014	98	0.0468827	0.0537343	1.77089	76	0.372052	0.823491	30.57	2.59517	52.0494	0.00523542	0.248921	62.06	6.84649	29.1861	3097.74
Bortala Mongolian Autonomous Prefecture	2015	193	0.0423965	0.0571655	1.88733	77.9	0.391965	0.573888	36.16	1.77499	47.1595	0	0.330217	62.31	6.94895	30.3067	3604.66
Bortala Mongolian Autonomous Prefecture	2016	352	0.0441439	0.0466431	4.50242	77.8	0.431715	0.607831	33.9	1.91545	25.7456	0.113401	0.417478	51.0888	7.2436	23.8731	4288.97
Bortala Mongolian Autonomous Prefecture	2017	349	0.0107987	0.0466026	1.92805	81.6	0.436685	0.640192	37	2.01408	30.8487	0	0.490161	58.0984	7.07566	58.8419	4794.51
Bortala Mongolian Autonomous Prefecture	2018	501	0.0182591	0.046297	1.91186	80.2	0.43651	0.572764	35.8166	1.80981	27.3642	0	0.0534865	53.8976	7.33167	62.8917	5235.03
Bayangol Mongolian Autonomous Prefecture	2000	931	0.00753158	0.013302	2.32734	82.48	0.326633	1.44666	33.18	3.65562	3.5495	0	0.0705727	47.9	8.08929	10.9076	2504.68
Bayangol Mongolian Autonomous Prefecture	2001	764	0.00615461	0.009756	2.14187	82.25	0.310781	2.33974	33.7	5.40948	2.79945	0.0761198	0.018825	47.3	8.38388	15.3598	2647.05
Bayangol Mongolian Autonomous Prefecture	2002	1311	0.0415792	0.0147777	2.17686	82.19	0.291699	1.77953	35.2	4.2683	2.51236	0.15357	0.0196603	42.4	9.02713	18.7105	2799.41
Bayangol Mongolian Autonomous Prefecture	2003	1215	0.215473	0.0369098	2.13189	82.295	0.295638	2.15691	36.4	6.00873	1.52374	0.287374	0.0169572	44.93	8.86475	20.7763	2274.79
Bayangol Mongolian Autonomous Prefecture	2004	1583	0.0125941	0.0158412	2.20751	82.4	0.297069	2.10974	39.1	5.1287	1.48062	0.0869255	0.0452842	45.16	8.89488	22.6838	2936.81
Bayangol Mongolian Autonomous Prefecture	2005	1526	0.00629436	0.01596	2.11983	84.8	0.309205	1.74004	39.5	4.23896	0.685894	0.0090547	0.0353385	46.89	9.61542	24.1342	1928.08
Bayangol Mongolian Autonomous Prefecture	2006	1079	0.0170344	0.0189956	2.10294	86.3	0.326904	1.82785	37.71	4.51077	1.77934	0.119842	0.0252914	48.2	9.19991	26.3512	1611.61
Bayangol Mongolian Autonomous Prefecture	2007	1292	0.0081023	0.0221101	2.01113	85.3	0.309983	1.68143	38.1775	4.20262	3.96346	0.00210771	0.0308049	53.21	9.54131	29.1152	1741.4
Bayangol Mongolian Autonomous Prefecture	2008	2042	0.530324	0.124417	2.00475	87.7	0.319513	1.83559	38.4188	4.39808	5.4115	0	0.0196821	53.92	9.56827	29.9385	1733.3
Bayangol Mongolian Autonomous Prefecture	2009	3137	0.456329	0.0871695	1.84239	84	0.464591	1.9935	38.66	5.00064	1.5608	0	0.0211709	56.62	9.49623	22.5505	2159.46
Bayangol Mongolian Autonomous Prefecture	2010	4692	0.55762	0.126371	1.85811	83.1	0.263098	2.16853	36.01	5.40529	1.27726	0.186544	0.0365897	61.53	10.0712	23.539	2202.31
Bayangol Mongolian Autonomous Prefecture	2011	4759	0.553871	0.142622	1.79598	83.7	0.314541	2.17189	35.36	5.48494	1.3317	0.199449	0.0478838	59.56	9.25234	34.3546	2231.53
Bayangol Mongolian Autonomous Prefecture	2012	4949	0.34916	0.165787	1.81421	82.9	0.273021	2.1629	35.685	5.59654	1.1607	0.198795	0.0881986	60.17	9.26713	36.4385	2523.03
Bayangol Mongolian Autonomous Prefecture	2013	5998	0.401051	0.12203	1.81582	82.6	0.252264	2.42635	34.35	6.60447	1.15891	0.192512	0.0685368	63.15	9.6356	38.3291	2531.79
Bayangol Mongolian Autonomous Prefecture	2014	5775	0.245574	0.130633	1.81045	83.5	0.249632	2.0552	35.11	5.5598	1.20736	0.161468	0.044965	65.78	9.52545	39.6276	2604.45
Bayangol Mongolian Autonomous Prefecture	2015	5161	0.271425	0.139496	1.87389	82.5	0.287982	1.72618	34.73	4.60659	2.21338	0.164041	0.0569977	66.75	9.29906	40.2805	3363.43
Bayangol Mongolian Autonomous Prefecture	2016	4471	0.319683	0.116154	3.63779	78	0.234308	1.62875	34.92	4.55927	2.8873	0	0.07793	64.7824	10.4753	40.5964	4344.2
Bayangol Mongolian Autonomous Prefecture	2017	6119	0.377595	0.0872007	1.88854	81.7	0.219662	1.76817	34.825	5.22293	2.59938	0.18776	0.099553	71.0626	11.533	73.1666	4702.89
Bayangol Mongolian Autonomous Prefecture	2018	6602	0.319913	0.0926352	1.89505	84.9	0.23937	1.79956	34.8725	5.23254	1.45634	0	0.00875877	77.4897	12.1306	79.9538	5070.33
Aksu Administrative Offices	2000	1340	0.0308017	0.0141844	3.14909	53.89	0.212464	0.787011	36.26	2.13633	0.108864	0.0885069	0.00619549	30.8	7.09833	10.1418	884.965
Aksu Administrative Offices	2001	1913	0.0193757	0.00912499	2.68017	57.5	0.209646	0.963127	37.3	2.43888	0.748352	0	0.0711693	31.5	7.81761	20.7459	952.769
Aksu Administrative Offices	2002	1407	0.0234288	0.0135723	3.06116	58.68	0.196834	1.34818	36.7	3.26711	0.0184012	0.00849286	0.0535333	31	7.70561	10.2431	1024.96
Aksu Administrative Offices	2003	1593	0.0278548	0.0153576	2.54565	60.44	0.21138	1.32834	37.6	3.26641	0.0776547	0.836945	0.0214845	31.08	8.07427	11.3945	1072.39
Aksu Administrative Offices	2004	2167	0.016816	0.0161646	2.34998	62.2	0.188568	1.48057	38.4	3.72615	0.264622	0.344925	0.152931	30.77	8.59872	12.3894	1370.98
Aksu Administrative Offices	2005	1430	0.0122339	0.025006	2.4048	60.4	0.175059	2.61761	38.9	6.28983	1.00985	0	0.0946838	30.53	8.74227	12.5856	1571.08
Aksu Administrative Offices	2006	1643	0.0515292	0.0377873	2.34821	61.5	0.179368	2.96118	39.47	7.1101	0.849948	0.0287978	0.0222155	33.05	8.74228	12.4651	1532.53
Aksu Administrative Offices	2007	602	0.114414	0.0204988	2.62242	63.3	0.18719	3.15987	38.6	7.66688	0.870697	0	0.00821103	39.55	8.91945	12.6175	1661.2
Aksu Administrative Offices	2008	1402	0.0399461	0.0272336	2.83636	65.7	0.141399	2.70916	41.22	6.63063	2.13476	0.0574695	0.011443	38.96	8.65639	12.9076	1917.45
Aksu Administrative Offices	2009	3593	0.214389	0.0447668	2.65943	65.8	0.17974	2.87122	41.56	7.14847	2.98014	0	0.00916639	42.89	8.15323	26.9741	2093.46
Aksu Administrative Offices	2010	4443	0.160112	0.0343723	2.46225	65.2	0.195325	3.00865	40.91	7.45267	4.48005	0	0.0651115	46.7	7.72132	26.8132	1844.96
Aksu Administrative Offices	2011	3397	0.153023	0.0320592	2.68371	68.1	0.196303	3.56647	39.87	8.7016	4.11014	0.0747785	0.0417279	49.26	7.40732	29.0796	2045.89
Aksu Administrative Offices	2012	3758	0.0814212	0.0359734	2.6423	68.7	0.185425	3.48835	40.26	8.67727	5.70759	0.301328	0.0412495	50.94	7.30895	29.2658	2285.77
Aksu Administrative Offices	2013	5464	0.099699	0.0367034	2.5459	68.2	0.164983	3.58178	32.45	9.21935	5.22847	0.304505	0.0303253	54.45	7.44028	28.9937	2713.7
Aksu Administrative Offices	2014	3209	0.215561	0.0399782	2.50467	70.6	0.176978	3.61411	34.47	9.63529	4.62059	0.271534	0.0136791	54.14	6.83711	28.2793	2997.75
Aksu Administrative Offices	2015	3303	0.172271	0.0430038	2.43994	70.8	0.168998	2.75644	33.46	7.01349	2.15935	0.0439648	0.0129896	55.51	7.03307	15.4011	3117.65
Aksu Administrative Offices	2016	3650	0.148204	0.0373736	3.79166	70.6	0.174087	2.31489	35.355	5.75757	1.29778	0.169604	0.0156622	51.7681	7.21283	18.7083	3733.03
Aksu Administrative Offices	2017	6049	0.0577629	0.024493	2.56884	75.4	0.197567	2.36905	37.25	5.97396	2.3087	0	0.0158024	56.6777	8.03461	74.502	3975.01
Aksu Administrative Offices	2018	8821	0.0639534	0.028506	2.5713	74.8	0.205392	2.33297	36.3025	5.8745	1.85094	0	0.014234	57.1456	8.90503	81.9235	4004.44
Kizilsu Kirgiz Autonomous Prefecture	2000	331	0	0	4.32767	59.06	0.127707	0.80784	20.59	2.34392	29.7009	0	0.00415833	34.6	7.01128	11.6242	534.269
Kizilsu Kirgiz Autonomous Prefecture	2001	376	0	0	2.61811	66.59	0.122908	0.24955	18.1	0.760943	15.3842	0	1.12642	33.4	8.0273	12.0485	549.808
Kizilsu Kirgiz Autonomous Prefecture	2002	532	0	0	5.29794	67.57	0.131353	0.288937	22.4	0.889363	9.01892	0	0.999735	30.7	8.55929	17.027	579.214
Kizilsu Kirgiz Autonomous Prefecture	2003	606	0	0	3.7065	68.735	0.11843	0.252569	22.6	0.770218	14.7191	0	0.173364	32.22	9.25706	14.8656	611.498
Kizilsu Kirgiz Autonomous Prefecture	2004	619	0	0	3.69843	69.9	0.108755	0.407221	23.3	1.26579	32.6482	0.0115507	0.0438928	30.83	9.50397	16.2341	740.895
Kizilsu Kirgiz Autonomous Prefecture	2005	319	0	0	3.68204	69.8	0.106769	0.0449818	25.7	0.155369	39.1445	0	0.210984	30.96	9.59622	16.9071	646.781
Kizilsu Kirgiz Autonomous Prefecture	2006	256	0	0	3.8358	72.8	0.101941	0.0617099	26.76	0.20439	47.6094	0	0.525714	34.19	9.94706	16.4435	706.45
Kizilsu Kirgiz Autonomous Prefecture	2007	249	0.00421706	0	4.01018	74.7	0.159664	0.0727037	25.7	0.262089	101.202	0.234086	0.429691	41.22	9.05104	16.7222	752.893
Kizilsu Kirgiz Autonomous Prefecture	2008	195	0.00614268	0.00206186	4.1003	76.2	0.113243	0.0999747	27.77	0.394022	87.8527	8.84098	0.845703	43.98	7.38143	17.1392	830.512
Kizilsu Kirgiz Autonomous Prefecture	2009	120	0.242122	0.0305825	4.2754	77.2	0.141822	0.146799	28.98	0.451848	31.5342	0.483976	0.688087	49.75	7.41029	34.7573	878.136
Kizilsu Kirgiz Autonomous Prefecture	2010	242	0.16054	0.024048	4.62671	79.9	0.156482	0.612681	24.59	1.72383	17.8955	1.5254	2.95502	53.54	7.18881	34.4836	968.239
Kizilsu Kirgiz Autonomous Prefecture	2011	158	0.166719	0.0295264	4.47368	81.2	0.163464	0.832752	25	2.26113	20.9102	0.888968	0.976385	56.65	6.53933	37.0319	1016.03
Kizilsu Kirgiz Autonomous Prefecture	2012	353	0.111812	0.025	4.9406	82.9	0.163645	0.903927	24.59	2.7999	26.9608	0.0113776	0.828497	57.21	6.7609	39.0237	1117.48
Kizilsu Kirgiz Autonomous Prefecture	2013	535	0.0945792	0.0169672	4.43194	84.1	0.198425	1.10638	31.25	3.40125	34.3695	0	0.861227	53.99	7.07813	39.0068	1215.57
Kizilsu Kirgiz Autonomous Prefecture	2014	756	0.0614385	0.0113692	4.01484	85.3	0.210887	0.753763	29.87	2.26647	37.3622	0.631146	0.513451	54.66	7.36303	37.8724	1375.04
Kizilsu Kirgiz Autonomous Prefecture	2015	668	0.0601821	0.00623693	4.13415	85.8	0.204534	0.53805	30.985	1.97324	17.553	0.354845	0.473749	59.25	6.9331	36.8514	1550.08
Kizilsu Kirgiz Autonomous Prefecture	2016	382	0.0653534	0.00912267	2.14187	85	0.199437	0.637123	32.1	2.60033	20.1867	0.0953015	0.544675	66.6114	6.98453	19.0877	1809.01
Kizilsu Kirgiz Autonomous Prefecture	2017	798	0.0466316	0.00575791	4.05687	88.2	0.273697	0.663403	32.9297	2.38959	22.6357	0.00853919	0.473071	62.5201	7.44842	84.2055	1775.6
Kizilsu Kirgiz Autonomous Prefecture	2018	512	0.0456197	0.00699645	3.48591	87.9	0.281873	0.412522	33.9866	1.50813	8.31105	0.00821453	0.0770112	63.9712	7.62469	94.103	1847.12
Kashgar Administrative Offices	2000	2455	0.000225355	0	3.87129	45.75	0.177689	0.323013	20.88	0.87597	7.03213	0.016461	1.70865	23.6	6.6638	29.1385	504.973
Kashgar Administrative Offices	2001	2436	0.000605136	0.000313623	4.53584	47.59	0.167801	0.238874	30.1	0.69326	2.12269	0.0450784	0.963796	23.8	7.32292	8.75008	529.317
Kashgar Administrative Offices	2002	4521	0.000541027	0.000268817	4.64037	49.04	0.180305	0.325474	29.2	0.931053	1.32014	0.0134342	0.645882	23.6	8.02281	8.47222	553.669
Kashgar Administrative Offices	2003	5591	0.00344297	0.00361217	4.37247	52.42	0.181203	0.328692	33	0.969975	2.57894	0.0629779	0.475963	23.49	8.63357	9.99525	650.516
Kashgar Administrative Offices	2004	4877	0.00714901	0.00334875	4.32473	55.8	0.191213	0.346975	24.97	1.05579	4.52557	0.0893068	1.33462	24.37	8.91952	10.3384	742.034
Kashgar Administrative Offices	2005	3684	0.00533667	0.00372139	4.2472	56.45	0.198345	0.423882	25.09	1.29079	6.61586	0.00481723	0.337989	24.7	8.73882	10.2676	860.826
Kashgar Administrative Offices	2006	4017	0.00479903	0.00152267	4.23812	57.1	0.196986	0.389985	25.09	1.18341	23.6217	0.0271876	0.525789	25.19	9.55702	10.5239	1005.88
Kashgar Administrative Offices	2007	4153	0.0754226	0.00934714	3.76358	57.75	0.191676	0.420142	25.09	1.27546	46.2084	0.101504	0.520514	30.57	10.0294	10.6488	1207.37
Kashgar Administrative Offices	2008	4577	0.0495042	0.0179079	3.94859	58.4	0.18998	0.406881	27.57	1.24117	55.4323	0	0.331821	31.72	9.32449	12.242	1344.78
Kashgar Administrative Offices	2009	9360	0.223159	0.00717164	3.72901	59.4	0.196095	0.409196	31.9	1.23307	21.054	0	0.277339	35.66	9.18953	12.9533	1604.03
Kashgar Administrative Offices	2010	9591	0.16978	0.0158668	3.91824	57.8	0.161772	0.330208	31.79	0.992647	16.8209	0.0347904	0.584479	41.33	8.76765	27.4389	1451.34
Kashgar Administrative Offices	2011	6991	0.181662	0.0164022	3.36634	64.1	0.178797	0.367772	29.27	1.09965	15.4895	0	0.54465	44.57	7.89024	32.4676	1810.64
Kashgar Administrative Offices	2012	9873	0.123288	0.010271	3.18543	66.1	0.183687	0.351645	30.62	1.0661	13.2142	0.0829724	0.384967	44.6	8.28253	35.1388	2071.19
Kashgar Administrative Offices	2013	10699	0.107177	0.0118509	2.86557	69	0.18235	0.332257	28.045	1.02722	20.1677	0.0285043	0.202842	46.14	8.5042	35.1744	2504.81
Kashgar Administrative Offices	2014	10257	0.0970231	0.0112844	2.78688	70	0.188706	0.235803	25.47	0.741787	17.1255	0.027928	0.0583543	46.06	8.26892	34.6513	2500.25
Kashgar Administrative Offices	2015	9346	0.0886767	0.0107674	2.86932	70.9	0.170064	0.299654	25.64	0.913229	12.5706	0.0804622	0.0608256	51.8	8.07041	35.501	2692.4
Kashgar Administrative Offices	2016	9351	0.0941833	0.0104489	1.57195	65.8	0.137761	0.257511	27.09	0.768367	25.0201	0	0.0746276	56.254	8.43212	34.947	3196.08
Kashgar Administrative Offices	2017	16728	0.0796607	0.0108742	3.00799	68.5	0.14617	0.254983	26.365	0.756862	25.2184	0.00129122	0.115806	58.2683	9.7083	94.6132	3228.98
Kashgar Administrative Offices	2018	16028	0.0789672	0.0102957	2.99253	68.4	0.146442	0.237786	26.7275	0.714739	12.1758	0.0137534	0.0102593	58.3819	10.3038	96.0765	3461.6
Hotan Administrative Offices	2000	1420	0.00921557	0.000898957	5.93829	44.72	0.153277	0.616577	29.1	1.72777	10.7661	0	0.0884966	25.5	6.18295	2.99272	305.541
Hotan Administrative Offices	2001	1344	0.0101643	0.00223701	7.37818	46.78	0.124543	0.418962	29.1	1.22226	10.9343	0	0.166867	25.6	6.60287	11.6397	296.222
Hotan Administrative Offices	2002	1596	0.00594318	0.000154321	7.62348	48.67	0.120651	0.374623	26.6	1.1459	4.55761	0	0.125709	26.4	6.78301	3.324	297.072
Hotan Administrative Offices	2003	2233	0.0189162	0.00330033	6.46365	51.335	0.143351	0.318184	21.2	0.964944	0.089468	0	0.0348925	27.74	6.51505	7.78787	294.862
Hotan Administrative Offices	2004	3365	0.00465299	0.000158479	6.24947	54	0.157655	0.344068	22.08	1.03893	1.82257	0	0.386043	26.64	7.13711	7.92544	593.043
Hotan Administrative Offices	2005	1797	0.0260336	0.000740521	5.85648	54.8	0.1799	0.302207	22.38	0.916678	0.711983	0	0.950951	28.08	6.89177	8.47502	454.705
Hotan Administrative Offices	2006	1718	0.0352349	0.00292826	5.69795	59.7	0.191205	0.311797	23.98	0.955113	0.407644	0	0.265041	30.79	6.74843	8.74085	548.166
Hotan Administrative Offices	2007	1487	1.65913	0.0355826	5.59476	59.9	0.195303	0.395463	22.72	1.19986	0.674492	0	0.270991	28.25	7.02204	8.79572	610.628
Hotan Administrative Offices	2008	2115	0.0327415	0.00452617	5.2106	61.1	0.206646	0.351525	23	1.08968	4.88243	0	0.290765	34.84	7.3974	9.26641	658.106
Hotan Administrative Offices	2009	2661	0.0576881	0.00957592	4.98298	64.1	0.204123	0.366766	23.05	1.20437	0.0539818	0	0.235978	45.37	7.30028	19.6122	677.081
Hotan Administrative Offices	2010	4060	0.0517341	0.00839701	4.62763	64.9	0.203692	0.3251	21.81	1.08073	0.468318	0	0.381326	50.81	6.85467	20.7049	692.274
Hotan Administrative Offices	2011	3688	0.044086	0.00710605	4.12182	67.9	0.18039	0.256526	21.32	0.888983	0.22378	0.0228866	0.514694	52.39	6.37972	35.2513	706.941
Hotan Administrative Offices	2012	9503	0.0396708	0.00605917	4.02839	69	0.18871	0.222236	20.28	0.827819	0.312443	0	0.390018	55.46	7.15793	35.447	751.058
Hotan Administrative Offices	2013	10412	0.0340112	0.00407206	3.73217	69.1	0.183439	0.323425	19.38	1.14525	0.456603	0	0.116587	57.9	7.19436	35.3612	783.549
Hotan Administrative Offices	2014	7032	0.0254157	0.00330683	3.66796	70.5	0.228968	0.268289	19.38	0.958889	0.329067	0	0.0365286	57.38	6.19759	33.8019	824.154
Hotan Administrative Offices	2015	8574	0.0222984	0.00258296	3.55326	73.2	0.23033	0.265033	17.46	1.26398	0.260473	0.593048	0.0348539	59.15	6.04871	32.1725	841.649
Hotan Administrative Offices	2016	7852	0.022828	0.00522683	2.4076	72.6	0.234731	0.338532	12.27	1.05205	0.525121	0.046921	0.0429875	86.5622	5.85113	11.018	919.957
Hotan Administrative Offices	2017	10892	0.0117056	0.00117199	3.56081	77.7	0.242047	0.285186	16.4	0.900808	0.25045	0	0.0489735	67.104	6.5057	77.2265	960.104
Hotan Administrative Offices	2018	11596	0.0118526	0.00232925	3.53734	77.5	0.25247	0.329703	14.335	1.03506	0.72266	0	0.00822927	68.6201	6.93944	82.9063	948.67
Max		69874	1.65913	1.48626	7.62348	99.7	0.668168	9.61201	45.67	23.8071	361.898	8.84098	6.51135	144.794	22.5962	97.9487	23383.4
Min		80	0	0	1.50541	44.72	0.0754746	0.0449818	12.27	0.155369	0.0184012	0	0.000357857	23.49	2.43638	2.99272	294.862
Max-Min		69794	1.65913	1.48626	6.11807	54.98	0.592694	9.56702	33.4	23.6517	361.88	8.84098	6.51099	121.304	20.1598	94.956	23088.5
Xij
Urumqi City	2000	1.23422	1.23102	1.17653	1.89722	1.97963	1.87218	1.54594	1.23174	1.52792	1.05367	1.04617	1.31319	1.27295	1.36359	1.1775	1.27136
Urumqi City	2001	1.33679	1.17406	1.1285	1.87138	1.98236	1.71251	1.53046	1.37814	1.51067	1.03143	1.04499	1.30606	1.38094	1.59343	1.18347	1.27344
Urumqi City	2002	1.3301	1.22502	1.22492	1.87702	1.97945	1.78207	1.54964	1.43802	1.52411	1.03297	1.0412	1.29276	1.33643	1.60477	1.34742	1.2948
Urumqi City	2003	1.42329	1.2197	1.20643	1.8866	1.97881	1.78125	1.55863	1.3482	1.53849	1.05154	1.01668	1.10945	1.49908	1.65478	1.39159	1.28389
Urumqi City	2004	1.42524	1.23843	1.19365	1.89216	1.97817	1.78872	1.56742	1.39012	1.54691	1.078	1.04118	1.12716	1.59149	1.66931	1.42504	1.33148
Urumqi City	2005	1.44938	1.2099	1.20154	1.83009	1.97817	1.76957	1.57204	1.39311	1.54676	1.09625	1.04164	1.14008	1.43733	1.68551	1.44762	1.36545
Urumqi City	2006	1.5346	1.18463	1.15492	1.87953	1.98181	1.75593	1.58593	1.26766	1.55497	1.08041	1.1084	1.1639	1.57277	1.7218	1.3855	1.40048
Urumqi City	2007	1.56109	1.17819	1.16559	1.91774	1.96908	1.72043	1.61251	1.39521	1.58093	1.09664	1.11473	1.15068	1.59338	1.72655	1.41706	1.39806
Urumqi City	2008	1.66681	1.35609	1.19165	1.91659	1.97272	1.67335	1.6202	1.35778	1.5766	1.0983	1.0158	1.09321	1.55464	1.79515	1.46341	1.43768
Urumqi City	2009	1.90185	1.38108	1.26025	1.92546	1.97817	1.88456	1.65195	1.65808	1.59018	1.06388	1.0996	1.08595	1.62801	1.9646	1.4342	1.51821
Urumqi City	2010	2	1.3683	1.25916	1.9312	1.97817	1.85231	1.65631	1.67455	1.58946	1.0836	1.02882	1.15178	1.46742	2	1.47922	1.49339
Urumqi City	2011	1.90311	1.34643	1.28113	1.93508	1.98181	1.67124	1.65435	1.71647	1.58912	1.09531	1.05058	1.09068	1.68349	1.9193	1.55094	1.55304
Urumqi City	2012	1.88947	1.41687	1.34486	1.94651	1.98181	1.63091	1.69887	1.74042	1.63577	1.09055	1.06268	1.09611	1.6543	1.873	1.56587	1.59669
Urumqi City	2013	1.90807	1.49512	1.3397	1.94316	1.98363	1.63159	1.74414	1.76737	1.68813	1.06055	1.0566	1.09072	1.65257	1.85176	1.58351	1.67669
Urumqi City	2014	1.91239	1.52676	1.30569	1.91574	1.98545	1.62384	1.7508	1.78533	1.70515	1.05708	1.05168	1.05366	1.6947	1.85924	1.59094	1.72954
Urumqi City	2015	1.84083	1.53141	1.29587	1.90184	1.98363	1.65422	1.79327	1.83922	1.76074	1.03816	1.06445	1.06453	1.7116	1.80857	1.60523	1.77281
Urumqi City	2016	1.81159	1.61016	1.3061	1.90428	1.98545	1.61375	1.82456	1.85719	1.79416	1.03653	1.00779	1.15776	1.7113	1.7762	1.58765	1.95658
Urumqi City	2017	1.81379	1.50242	1.25941	1.90679	1.98909	1.60153	1.80975	1.88413	1.77413	1.04648	1.00218	1.16313	1.94789	1.97611	1.86969	2
Urumqi City	2018	1.81235	1.52893	1.27152	1.91204	1.99091	1.62329	1.8168	1.88713	1.77969	1.04572	1.00033	1.06426	2	1.98071	1.95204	1.96401
Karamay City	2000	1.01729	1.74168	1.47847	1.81075	1.99873	1.69035	1.05877	1.39581	1.14281	1.00759	1	1.00132	1.24575	1.35692	1.73348	1.15612
Karamay City	2001	1.0056	1.58357	1.48799	1.7265	2	1.31077	1.06461	1.81826	1.1518	1.00757	1	1.00039	1.23091	1.26842	2	1.12444
Karamay City	2002	1.00851	1.61535	1.47579	1.84457	1.99964	1.59501	1.09085	1.56377	1.16832	1.00668	1	1.00039	1.26965	1.26788	1.59048	1.1396
Karamay City	2003	1.00759	1.36065	1.60769	1.87766	1.99982	1.62093	1.07109	1.6506	1.15523	1.00726	1.0026	1.00022	1.3093	1.32362	1.85089	1.1055
Karamay City	2004	1.00633	1.51371	1.82735	1.88464	2	1.43259	1.02395	1.72545	1.11053	1.00497	1	1.00066	1.41293	1.34147	1.79751	1.08908
Karamay City	2005	1.00788	1.58675	2	1.91777	1.99818	1.19783	1.00879	1.72545	1.09999	1.00454	1.0001	1.00111	1.40617	1.38025	1.76027	1.08195
Karamay City	2006	1.01727	1.49934	1.85399	1.91525	1.99818	1.16648	1.11211	1.82455	1.21267	1.00323	1	1.00059	1.41763	1.45307	1.73237	1.06865
Karamay City	2007	1.03118	1.51757	1.88022	1.91987	1.99636	1.12851	1.17923	1.91497	1.27174	1.00471	1.00005	1.00038	1.29447	1.55612	1.64784	1.077
Karamay City	2008	1.03285	1.38236	1.67483	1.9275	1.99636	1.09473	1.19917	1.8979	1.29285	1.00352	1	1.00033	1.3741	1.57047	1.64539	1.05869
Karamay City	2009	1.03264	1.70166	1.98573	1.92656	1.99272	1.27025	1.12618	1.91317	1.22197	1.00707	1	1.0004	1.35596	1.56928	1.7271	1.1142
Karamay City	2010	1.0257	1.4725	1.91478	1.97149	1.99636	1.20769	1.0574	1.91707	1.143	1.00731	1	1.00059	1.19216	1.55343	1.75509	1.09878
Karamay City	2011	1.02184	1.45084	1.90747	1.97073	1.99454	1.17596	1.03561	1.91737	1.13337	1.01039	1.01367	1.0005	1.3431	1.52459	1.78533	1.10764
Karamay City	2012	1.01894	1.75622	1.5956	1.96777	1.99454	1.12032	1.05546	1.91766	1.14959	1.00509	1.01515	1.00144	1.28169	1.49197	1.92078	1.13101
Karamay City	2013	1.02082	1.42159	1.56923	1.98143	1.99454	1.09359	1.04067	1.91796	1.1394	1.01557	1.0143	1.00176	1.27567	1.50309	1.96862	1.15806
Karamay City	2014	1.02194	1.67664	1.54787	1.96192	1.99454	1	1	1.92126	1.10262	1.01019	1	1.00265	1.30213	1.49464	1.96606	1.17505
Karamay City	2015	1.01984	1.6973	1.52743	1.95897	1.99091	1.21008	1.12972	1.92994	1.21757	1.00255	1	1.00505	1.29595	1.47104	1.96152	1.29617
Karamay City	2016	1.02284	1.48991	1.45254	1.96345	1.98909	1.07163	1.1033	1.92246	1.1853	1.00384	1.28685	1.00604	1.31912	1.49808	1.83946	1.35009
Karamay City	2017	1.02374	1.46577	1.50193	1.96518	1.99272	1.10243	1.17621	1.92156	1.25056	1.00224	1	1.00679	1.35343	1.50269	1.92249	1.29117
Karamay City	2018	1.03764	1.37169	1.45133	1.96799	1.99454	1.10655	1.22417	1.92874	1.28471	1.00266	1	1.00504	1.37407	1.5621	1.9997	1.23733
Turpan City	2000	1.00398	1.02953	1.01137	1.74717	1.77846	1.55087	1.84373	1.56796	1.85021	1.00436	1.00376	1.1457	1.06356	1.25556	1.08064	1.05617
Turpan City	2001	1.00311	1.03	1.01283	1.78815	1.80611	1.55351	1.89222	1.59371	1.89408	1.00159	1	1.12207	1.06933	1.26234	1.07574	1.05433
Turpan City	2002	1.00917	1.03222	1.01956	1.77812	1.80648	1.59964	1.91241	1.81228	1.90979	1.00054	1.01413	1.08772	1.09159	1.27561	1.08825	1.0968
Turpan City	2003	1.0101	1.03092	1.01567	1.81005	1.8032	1.57571	1.92033	1.92605	1.91595	1.0009	1.01241	1.03484	1.10494	1.26565	1.09054	1.05375
Turpan City	2004	1.00506	1.00918	1.00819	1.89276	1.79993	1.55721	1.88329	1.92605	1.88905	1.00122	1	1.14571	1.08821	1.25832	1.09091	1.08108
Turpan City	2005	1.00403	1.00624	1.00716	1.91198	1.8163	1.52234	1.86152	1.93503	1.87049	1.00033	1.03914	1.06896	1.09159	1.24613	1.0913	1.08421
Turpan City	2006	1.00195	1.05827	1.05153	1.90845	1.8363	1.53761	1.84802	1.30359	1.85417	1.00057	1	1.09138	1.08763	1.22892	1.10973	1.08763
Turpan City	2007	1.00221	1.07712	1.09576	1.90392	1.83085	1.56315	1.80668	1.53084	1.79358	1.00063	1.0019	1.16824	1.07675	1.20311	1.10185	1.08514
Turpan City	2008	1.0012	1.11325	1.02358	1.89273	1.8363	1.57633	1.77238	1.52934	1.75196	1.00067	1.00586	1.0538	1.08376	1.19036	1.11222	1.08868
Turpan City	2009	1.01337	1.63834	1.04867	1.87784	1.76719	1.77989	1.75758	1.53009	1.72926	1.00126	1.00285	1.06802	1.07848	1.19354	1.24578	1.13126
Turpan City	2010	1.00914	1.49141	1.05707	1.84043	1.76173	1.79624	1.65338	1.39858	1.60772	1.0009	1	1.22081	1.08928	1.17882	1.2742	1.13627
Turpan City	2011	1.01212	1.50706	1.05726	1.83198	1.78356	1.75267	1.58186	1.26707	1.51818	1.00241	1	1.17735	1.10148	1.17351	1.3609	1.1054
Turpan City	2012	1.01387	1.69494	1.11959	1.84147	1.75264	1.77071	1.56848	1.16407	1.49236	1.00243	1.0088	1.13757	1.12341	1.18236	1.40812	1.11754
Turpan City	2013	1.00926	1.67313	1.15088	1.84708	1.72717	1.7732	1.53999	1.64341	1.45847	1.00604	1.00927	1.05291	1.17872	1.16403	1.39825	1.12695
Turpan City	2014	1.01	1.5598	1.13276	1.8538	1.7108	1.8128	1.60334	1.71078	1.51529	1.00239	1.00021	1.04544	1.20774	1.15783	1.38618	1.15837
Turpan City	2015	1.01241	1.58884	1.10772	1.83642	1.60531	1.99714	1.68123	1.83952	1.60077	1.00341	1.01749	1.05515	1.23552	1.15702	1.33848	1.24602
Turpan City	2016	1.01188	1.45173	1.10534	1.83545	1.5944	1.96137	1.62233	1.85479	1.52204	1.00173	1	1.06461	1.26382	1.17889	1.32092	1.26005
Turpan City	2017	1.00769	1.27516	1.09424	1.83777	1.68352	1.89937	1.5166	1.78503	1.37075	1.0006	1	1.06782	1.32015	1.17761	1.80486	1.26043
Turpan City	2018	1.00969	1.16099	1.07949	1.84369	1.71444	1.8662	1.52841	1.81991	1.36362	1.00186	1.00022	1.0615	1.32045	1.19191	1.91808	1.25491
Hami City	2000	1.00804	1.01105	1.0153	1.63406	1.64714	1.85434	1.79914	1.68144	1.76027	1.02964	1.01606	1.00258	1.19381	1.30494	1.15467	1.0883
Hami City	2001	1.00484	1.02755	1.00658	1.87872	1.68425	1.87628	1.80421	1.6985	1.7587	1.03433	1.00278	1.00553	1.18804	1.28153	1.18238	1.09256
Hami City	2002	1.00954	1.02588	1.00787	1.64919	1.70517	1.89983	1.79383	1.71647	1.74965	1.01858	1.00325	1.00712	1.19958	1.32277	1.15684	1.09745
Hami City	2003	1.01006	1.02325	1.00584	1.70602	1.69343	1.90728	1.78684	1.73443	1.73925	1.02334	1.00157	1.00027	1.17699	1.32151	1.17174	1.09898
Hami City	2004	1.00838	1.01289	1.00642	1.74263	1.6817	1.91213	1.7501	1.78832	1.68909	1.01254	1.01931	1.01429	1.21838	1.37329	1.19957	1.11495
Hami City	2005	1.00324	1.00694	1.00269	1.7713	1.71444	1.83458	1.75293	1.67754	1.69961	1.00881	1.0123	1.06468	1.18243	1.36226	1.23118	1.10665
Hami City	2006	1.00321	1.01289	1.0074	1.79458	1.72899	1.80794	1.73815	1.67665	1.67983	1.01549	1.04228	1.07344	1.19266	1.36465	1.28751	1.12043
Hami City	2007	1.00249	1.01671	1.01149	1.80987	1.72354	1.80955	1.76054	1.76168	1.70532	1.01364	1.00626	1.04641	1.21195	1.35634	1.29069	1.13886
Hami City	2008	1.00221	1.00717	1.01955	1.87737	1.75264	1.51416	1.77026	1.83563	1.71999	1.0095	1.13638	1.03693	1.22654	1.33971	1.3032	1.13976
Hami City	2009	1.00692	1.07266	1.05682	1.87751	1.72354	1.80289	1.72138	1.87156	1.66679	1.00892	1.02721	1.03384	1.222	1.33678	1.21301	1.17713
Hami City	2010	1.00777	1.04679	1.05209	1.87773	1.74354	1.81711	1.72638	1.86377	1.67032	1.00236	1.10439	1.05659	1.24632	1.32202	1.24237	1.18366
Hami City	2011	1.00655	1.04419	1.06195	1.88758	1.76719	1.8015	1.71419	1.90958	1.64695	1.00206	1.06653	1.04422	1.29644	1.29359	1.33811	1.20272
Hami City	2012	1.00685	1.04464	1.04836	1.8865	1.78174	1.7284	1.65928	1.93114	1.59177	1.00166	1.0621	1.04368	1.28812	1.31339	1.34565	1.24112
Hami City	2013	1.01325	1.05646	1.0436	1.90185	1.80175	1.64301	1.44186	1.91826	1.34535	1.00413	1.03459	1.03083	1.29818	1.32367	1.35117	1.27305
Hami City	2014	1.01417	1.03531	1.04101	1.89906	1.83267	1.57645	1.14117	1.84731	1	1.01703	1.02429	1.01439	1.30972	1.31755	1.35334	1.31108
Hami City	2015	1.01575	1.06505	1.03744	1.893	1.8363	1.59703	1.39874	1.77305	1.29613	1.01756	1.05596	1.01679	1.34574	1.32258	1.36224	1.36644
Hami City	2016	1.01374	1.10134	1.04192	1.89648	1.83085	1.56882	1.34418	1.80719	1.23353	1.02476	1.00082	1.02018	1.25744	1.36647	1.31733	1.42588
Hami City	2017	1.0111	1.0617	1.03997	1.89655	1.85813	1.55042	1.44116	1.80269	1.3425	1.00445	1.00132	1.01803	1.26298	1.36825	1.67932	1.42036
Hami City	2018	1.01248	1.07353	1.03932	1.8985	1.86722	1.52964	1.30943	1.80494	1.19925	1.00433	1.00709	1.0008	1.27528	1.35931	1.71713	1.41954
Changji Hui Autonomous Prefecture	2000	1.02765	1.01516	1.0091	1.95493	1.34885	1.81404	1.79637	1.54132	1.75578	1.03722	1.02415	1.00058	1.07015	1.27446	1.18443	1.06878
Changji Hui Autonomous Prefecture	2001	1.01075	1.03318	1.00638	1.95251	1.42015	1.8094	1.81999	1.41407	1.78352	1.01702	1.01435	1.00054	1.07675	1.26158	1.1069	1.0729
Changji Hui Autonomous Prefecture	2002	1.02292	1.01061	1.00749	1.95649	1.42506	1.80399	1.83187	1.55778	1.79889	1.03441	1.00069	1.00047	1.10478	1.3032	1.15033	1.08093
Changji Hui Autonomous Prefecture	2003	1.03463	1.02798	1.01056	1.98038	1.4388	1.83138	1.83798	1.61168	1.79295	1.05591	1.04355	1.00039	1.12415	1.32522	1.13559	1.08003
Changji Hui Autonomous Prefecture	2004	1.04734	1.00885	1.0069	1.99448	1.45253	1.81674	1.81055	1.60868	1.76109	1.03347	1.01758	1.00044	1.1638	1.36443	1.16766	1.1065
Changji Hui Autonomous Prefecture	2005	1.04174	1.0161	1.0082	1.97362	1.43252	1.81153	1.83321	1.6506	1.80019	1.06689	1.01458	1.00023	1.17411	1.36738	1.17214	1.11541
Changji Hui Autonomous Prefecture	2006	1.0646	1.3201	1.04438	1.97165	1.4598	1.81326	1.83337	1.58204	1.79911	1.09882	1.01356	1.00057	1.17023	1.3956	1.17472	1.13194
Changji Hui Autonomous Prefecture	2007	1.09193	1.14017	1.03949	1.93076	1.4398	1.79587	1.82195	1.67635	1.7856	1.16115	1.01752	1.00002	1.21054	1.45066	1.19002	1.16581
Changji Hui Autonomous Prefecture	2008	1.11236	1.09124	1.03688	1.94569	1.45798	1.80639	1.78233	1.78772	1.73991	1.1792	1.11518	1	1.2835	1.46991	1.21093	1.18913
Changji Hui Autonomous Prefecture	2009	1.10101	1.14814	1.04959	1.94368	1.46344	1.83456	1.74683	1.79461	1.69755	1.09615	1.05098	1.00002	1.30485	1.46299	1.35615	1.23117
Changji Hui Autonomous Prefecture	2010	1.10136	1.21486	1.0465	1.98642	1.46344	1.82751	1.70094	1.79461	1.64785	1.06955	1.03391	1.00078	1.32035	1.43879	1.38688	1.2384
Changji Hui Autonomous Prefecture	2011	1.14061	1.24739	1.04671	1.99986	1.51255	1.83538	1.64776	1.7006	1.58542	1.05361	1.03772	1.00206	1.35159	1.49665	1.35498	1.25938
Changji Hui Autonomous Prefecture	2012	1.14271	1.27842	1.08157	2	1.52346	1.84602	1.66533	1.80389	1.59578	1.0449	1.03641	1.0062	1.39018	1.50065	1.36352	1.29735
Changji Hui Autonomous Prefecture	2013	1.1443	1.3214	1.06522	1.99347	1.54165	1.89641	1.57806	1.80389	1.44855	1.02875	1.03347	1.0048	1.38548	1.51187	1.37971	1.35681
Changji Hui Autonomous Prefecture	2014	1.1398	1.18416	1.05421	1.98912	1.59258	1.84794	1.53903	1.80479	1.37796	1.02283	1.03992	1.00428	1.3807	1.48177	1.39307	1.42849
Changji Hui Autonomous Prefecture	2015	1.1607	1.20982	1.04352	1.97572	1.60713	1.87193	1.53202	1.80808	1.34427	1.02145	1.02222	1.00629	1.3929	1.51608	1.40445	1.50021
Changji Hui Autonomous Prefecture	2016	1.14281	1.25309	1.04554	1.96811	1.64169	1.87391	1.54467	1.76407	1.34924	1.01867	1.01179	1.00744	1.33475	1.4807	1.2942	1.5733
Changji Hui Autonomous Prefecture	2017	1.14772	1.38203	1.05288	1.96098	1.68534	1.85718	1.55219	1.82395	1.36808	1.00999	1.00471	1.00854	1.34972	1.47493	1.67078	1.62541
Changji Hui Autonomous Prefecture	2018	1.14954	1.31974	1.04282	1.95323	1.70535	1.79995	1.57282	1.79401	1.40622	1.01202	1.00084	1.01205	1.37626	1.48214	1.7196	1.59503
prefectures and cities directly under Ili Kazak Autonomous Prefecture	2000	1.03285	1.05317	1.01213	1.91694	1.25082	1.74348	1.90034	1.91377	1.87921	1.09882	1.00089	1.02182	1.04377	1.26312	1.11292	1.0417
prefectures and cities directly under Ili Kazak Autonomous Prefecture	2001	1.04344	1.0261	1.01038	1.8208	1.35158	1.74543	1.87357	1.58174	1.84707	1.03872	1.00544	1.02991	1.06768	1	1.11843	1.03759
Counties (Cities) Direct Under Ili Prefecture	2002	1.04754	1.02225	1.01263	1.86969	1.37541	1.77069	1.86705	1.82126	1.83976	1.05769	1	1.01954	1.08252	1.22981	1.12654	1.04378
Counties (Cities) Direct Under Ili Prefecture	2003	1.04629	1.03807	1.01719	1.85273	1.42033	1.77806	1.88276	1.83323	1.85858	1.16241	1.00121	1.01535	1.08714	1.24231	1.13105	1.03763
Counties (Cities) Direct Under Ili Prefecture	2004	1.04571	1.03775	1.01799	1.84568	1.46526	1.76947	1.8757	1.83323	1.84849	1.16118	1.03681	1.03211	1.08796	1.24849	1.13865	1.0471
Counties (Cities) Direct Under Ili Prefecture	2005	1.04979	1.07046	1.02005	1.87386	1.51619	1.66274	1.84975	1.81796	1.8189	1.25104	1.02754	1.06398	1.08953	1.25904	1.14449	1.04819
Counties (Cities) Direct Under Ili Prefecture	2006	1.04831	1.03481	1.01893	1.87867	1.54529	1.65233	1.81596	1.82665	1.7787	1.24941	1.00961	1.02485	1.09983	1.25983	1.15217	1.05407
Counties (Cities) Direct Under Ili Prefecture	2007	1.04644	1.03627	1.01804	1.86375	1.54893	1.63998	1.81817	1.84401	1.77643	1.23032	1.00633	1.01881	1.11731	1.25285	1.16772	1.05901
Counties (Cities) Direct Under Ili Prefecture	2008	1.06462	1.03591	1.01971	1.85846	1.58167	1.63566	1.82825	1.77365	1.78597	1.41871	1.01389	1.02969	1.13231	1.2578	1.17646	1.06612
Counties (Cities) Direct Under Ili Prefecture	2009	1.09171	1.08161	1.03178	1.84734	1.5653	1.63141	1.81142	1.8012	1.75984	1.20968	1.04613	1.03221	1.16232	1.26735	1.13465	1.07912
Counties (Cities) Direct Under Ili Prefecture	2010	1.11127	1.05921	1.02861	1.84732	1.5653	1.64733	1.78524	1.80269	1.7264	1.22373	1.1108	1.11337	1.22052	1.26415	1.13671	1.08254
Counties (Cities) Direct Under Ili Prefecture	2011	1.08469	1.05766	1.03139	1.87943	1.57985	1.61983	1.79557	1.80928	1.73751	1.20106	1.02374	1.34082	1.20321	1.23965	1.26063	1.09006
Counties (Cities) Direct Under Ili Prefecture	2012	1.09196	1.09594	1.03319	1.88131	1.57439	1.61648	1.79453	1.81557	1.73706	1.1724	1.02315	1.3304	1.24253	1.23726	1.26504	1.10457
Counties (Cities) Direct Under Ili Prefecture	2013	1.10196	1.18763	1.04818	1.89052	1.57439	1.62477	1.72876	1.86467	1.65792	1.18855	1.01865	1.33452	1.2563	1.23501	1.26468	1.11471
Counties (Cities) Direct Under Ili Prefecture	2014	1.09584	1.09526	1.03974	1.8865	1.57075	1.6822	1.71874	1.86707	1.63674	1.18082	1.00767	1.3173	1.26635	1.22982	1.26403	1.13094
Counties (Cities) Direct Under Ili Prefecture	2015	1.1081	1.12447	1.03292	1.87247	1.58348	1.71034	1.81758	1.75928	1.76579	1.09982	1.02033	1.35268	1.29859	1.23141	1.26607	1.14419
Counties (Cities) Direct Under Ili Prefecture	2016	1.10712	1.16713	1.04175	1.94396	1.57257	1.70706	1.81699	1.75509	1.76228	1.1059	1.08043	1.48584	1.21987	1.2341	1.17359	1.17704
Counties (Cities) Direct Under Ili Prefecture	2017	1.12111	1.08985	1.04068	1.87047	1.64896	1.69018	1.8204	1.71856	1.76459	1.10793	1.13542	1.53201	1.23758	1.26037	1.6026	1.19241
Counties (Cities) Direct Under Ili Prefecture	2018	1.13637	1.09251	1.03818	1.87222	1.66351	1.5941	1.83543	1.73683	1.78103	1.10355	1.02177	2	1.25252	1.27759	1.7229	1.20086
Tarbagatai Administrative Offices	2000	1.01136	1.00287	1.00499	1.90225	1.32921	1.86708	1.94099	1.6	1.92857	1.05871	1.00112	1.00086	1.0751	1.28355	1.19123	1.05324
Tarbagatai Administrative Offices	2001	1.00623	1.0026	1.00368	1.93099	1.32939	1.90211	1.94227	1.59671	1.92955	1.05281	1	1.00189	1.06438	1.27674	1.39195	1.05838
Tarbagatai Administrative Offices	2002	1.00917	1.00112	1.00311	1.94342	1.33285	1.9061	1.93005	1.56677	1.91491	1.04256	1	1.00114	1.07428	1.28997	1.22168	1.06384
Tarbagatai Administrative Offices	2003	1.01013	1.00125	1.00159	1.98805	1.33267	1.9159	1.92617	1.65659	1.91141	1.13943	1	1.00037	1.06125	1.29378	1.15138	1.03821
Tarbagatai Administrative Offices	2004	1.00246	1.00167	1.00158	1.86699	1.33248	1.93915	1.92417	1.65958	1.90786	1.08278	1	1.00459	1.07996	1.29778	1.15134	1.03885
Tarbagatai Administrative Offices	2005	1.00443	1.0085	1.00536	1.8302	1.25973	1.95397	1.93453	1.65659	1.91847	1.09931	1	1.0116	1.07881	1.30286	1.13861	1.05041
Tarbagatai Administrative Offices	2006	1.0006	1.00144	1.00171	1.93096	1.28519	1.92985	1.93107	1.52964	1.91401	1.07244	1.00457	1.01665	1.10255	1.29945	1.14183	1.05528
Tarbagatai Administrative Offices	2007	1	1.00284	1.00317	1.92752	1.33794	1.95056	1.93108	1.70449	1.91284	1.08344	1.00063	1.00224	1.11096	1.30163	1.12821	1.06015
Tarbagatai Administrative Offices	2008	1.00155	1.00821	1.00251	1.87103	1.39433	1.92867	1.94122	1.77605	1.92383	1.07396	1.00081	1.00456	1.13058	1.29091	1.1317	1.06616
Tarbagatai Administrative Offices	2009	1.00718	1.10647	1.0412	1.88537	1.34522	1.91541	1.94971	1.78473	1.93544	1.05544	1.00304	1.00374	1.13586	1.28224	1.26206	1.07968
Tarbagatai Administrative Offices	2010	1.00841	1.07192	1.03137	1.98875	1.33248	1.87237	1.92479	1.78892	1.9042	1.0356	1	1.01603	1.10395	1.27009	1.26538	1.07763
Tarbagatai Administrative Offices	2011	1.01052	1.07478	1.0389	1.99434	1.36704	1.88985	1.91977	1.80419	1.89973	1.02289	1	1.01446	1.16084	1.26852	1.27989	1.09186
Tarbagatai Administrative Offices	2012	1.00875	1.01376	1.01229	1.97188	1.36522	1.86377	1.91068	1.81078	1.88894	1.01603	1.00991	1.01338	1.19167	1.2667	1.2859	1.10464
Tarbagatai Administrative Offices	2013	1.00983	1.02296	1.01385	1.9661	1.37432	1.91032	1.91455	1.85838	1.89371	1.03774	1.005	1.01647	1.20618	1.25296	1.29189	1.12354
Tarbagatai Administrative Offices	2014	1.01317	1.04256	1.01499	1.96169	1.37068	1.87716	1.91106	1.8503	1.89053	1.02503	1.00776	1.01495	1.23833	1.24286	1.29781	1.14461
Tarbagatai Administrative Offices	2015	1.01375	1.03537	1.0161	1.94406	1.34885	1.92553	1.94147	1.88683	1.92734	1.01112	1.00002	1.01947	1.27715	1.25503	1.30906	1.19252
Tarbagatai Administrative Offices	2016	1.01314	1.02961	1.01505	1.96122	1.3052	1.94486	1.94304	1.84446	1.93316	1.01847	1.10533	1.02601	1.2416	1.25018	1.19222	1.22904
Tarbagatai Administrative Offices	2017	1.0112	1.02475	1.01455	1.94814	1.38341	1.93403	1.93482	1.8021	1.9261	1.02621	1	1.02927	1.24942	1.23851	1.65834	1.25283
Tarbagatai Administrative Offices	2018	1.0132	1.03226	1.01527	1.95713	1.31793	1.89535	1.94155	1.82328	1.93194	1.0169	1.00852	1.04437	1.2901	1.24897	1.78881	1.24565
Altay Administrative Offices	2000	1.00476	1.00851	1.00709	1.77437	1.32284	1.95555	1.92786	1.6515	1.90703	1.06663	1.00178	1.01972	1.15012	1.28834	1.19334	1.06074
Altay Administrative Offices	2001	1.00383	1.00366	1	1.8206	1.33849	1.938	1.93322	1.66257	1.91271	1.04221	1	1.01418	1.13116	1.27919	1.22773	1.06489
Altay Administrative Offices	2002	1.00615	1.00491	1.00135	1.82732	1.36486	1.93309	1.93733	1.68653	1.91863	1.04087	1.0174	1.03096	1.1056	1.29713	1.19681	1.07069
Altay Administrative Offices	2003	1.00643	1.00518	1.00195	1.86866	1.39687	1.89876	1.94972	1.69251	1.93422	1.16915	1	1.01969	1.07996	1.29429	1.21906	1.08987
Altay Administrative Offices	2004	1.00799	1.00951	1.00467	1.83296	1.42888	1.82826	1.9568	1.70749	1.94278	1.05735	1	1.02729	1.10873	1.29809	1.22547	1.08597
Altay Administrative Offices	2005	1.00019	1.04452	1.01244	1.86168	1.4398	1.85894	1.94462	1.70749	1.92593	1.01686	1	1.04428	1.06884	1.27675	1.23755	1.09992
Altay Administrative Offices	2006	1.00221	1.00546	1.00354	1.83435	1.55984	1.71399	1.95193	1.67365	1.93334	1.00796	1	1.02713	1.08977	1.27104	1.27752	1.09888
Altay Administrative Offices	2007	1.00321	1.00164	1.00057	1.77914	1.60531	1.6771	1.93783	1.64192	1.91542	1.0113	1	1.02159	1.10272	1.25092	1.26311	1.10433
Altay Administrative Offices	2008	1.00188	1.00241	1.00106	1.76077	1.62168	1.64193	1.9333	1.70958	1.91029	1.04554	1.14022	1.01364	1.12135	1.23554	1.27303	1.10922
Altay Administrative Offices	2009	1.00877	1.02495	1.02372	1.75629	1.57621	1.76358	1.92805	1.69551	1.90342	1.07504	1.00257	1.01165	1.14888	1.21678	1.22965	1.12943
Altay Administrative Offices	2010	1.01728	1.01257	1.015	1.82494	1.60713	1.75606	1.91779	1.75479	1.89042	1.0951	1.22977	1.05645	1.19521	1.22055	1.24025	1.13792
Altay Administrative Offices	2011	1.02757	1.0121	1.01752	1.80027	1.64169	1.72975	1.90353	2	1.87131	1.09359	1.03957	1.07608	1.18985	1.21649	1.36482	1.14505
Altay Administrative Offices	2012	1.03039	1.02249	1.02212	1.81354	1.64351	1.69868	1.9468	1.17545	1.92269	1.08425	1.04824	1.10395	1.22786	1.23567	1.37573	1.16409
Altay Administrative Offices	2013	1.02814	1.02772	1.01884	1.8316	1.64896	1.77348	1.93538	1.11257	1.92084	1.08995	1.04704	1.16235	1.25391	1.22564	1.38025	1.18591
Altay Administrative Offices	2014	1.02397	1.03047	1.01999	1.84092	1.65442	1.80674	1.88671	1.75539	1.87444	1.11654	1.04952	1.15114	1.26668	1.20989	1.37471	1.21109
Altay Administrative Offices	2015	1.02175	1.03986	1.02177	1.83681	1.6235	1.87184	1.92487	1.76108	1.92085	1.06707	1.04497	1.1984	1.33255	1.21696	1.37496	1.25511
Altay Administrative Offices	2016	1.01116	1.04985	1.01893	1.85085	1.59258	1.8969	1.90226	1.7759	1.8974	1.08012	1	1.2415	1.22099	1.20135	1.27142	1.32163
Altay Administrative Offices	2017	1.01019	1.022	1.01629	1.83449	1.68534	1.89874	1.88476	1.79072	1.87776	1.08228	1	1.26804	1.23965	1.20008	1.7025	1.32477
Altay Administrative Offices	2018	1.01138	1.03107	1.0168	1.90236	1.67625	1.89895	1.88268	1.78331	1.87537	1.06137	1	1.07833	1.2401	1.21189	1.78437	1.32064
Bortala Mongolian Autonomous Prefecture	2000	1.00345	1.01943	1.00844	1.93579	1.2319	1.98175	1.92188	1.44401	1.90548	1.44431	1.00751	1.00278	1.10972	1.28281	1.09624	1.05053
Bortala Mongolian Autonomous Prefecture	2001	1.0043	1.03731	1.01067	1.93264	1.2841	1.99008	1.92481	1.48892	1.90986	1.38019	1	1.00125	1.1122	1.32166	1.11021	1.05769
Bortala Mongolian Autonomous Prefecture	2002	1.01027	1.03302	1.01245	1.8921	1.30975	1.98735	1.92276	1.61467	1.90751	1.63287	1	1.00179	1.12868	1.33804	1.1046	1.0655
Bortala Mongolian Autonomous Prefecture	2003	1.00418	1.06573	1.01442	1.9274	1.28838	2	1.93127	1.67156	1.91734	1.78247	1.00056	1.00008	1.12349	1.3023	1.11221	1.05261
Bortala Mongolian Autonomous Prefecture	2004	1.00029	1.05332	1.01183	1.94012	1.26701	1.99316	1.91364	1.70749	1.89392	2	1	1.00266	1.15877	1.2863	1.12253	1.05997
Bortala Mongolian Autonomous Prefecture	2005	1.00087	1.02826	1.01436	1.93883	1.44343	1.79013	1.92641	1.72545	1.90902	1.70477	1.00301	1.00247	1.14361	1.31313	1.1274	1.05293
Bortala Mongolian Autonomous Prefecture	2006	1.0008	1.04304	1.02	1.94844	1.45617	1.80604	1.94886	1.67126	1.93801	1.55659	1	1.00537	1.17872	1.31335	1.13696	1.05325
Bortala Mongolian Autonomous Prefecture	2007	1.00206	1.05922	1.0474	1.93658	1.42343	1.81738	1.941	1.5524	1.92772	1.46681	1	1.00237	1.16042	1.30644	1.15348	1.05637
Bortala Mongolian Autonomous Prefecture	2008	1.00781	1.00909	1.01308	1.92626	1.47617	1.80119	1.92997	1.63653	1.91315	1.47858	1.09741	1.00442	1.17823	1.30712	1.16058	1.06586
Bortala Mongolian Autonomous Prefecture	2009	1.00812	1.01057	1.04136	1.93175	1.45798	1.81526	1.91077	1.68473	1.88997	1.20503	1.01768	1.00369	1.17773	1.3	1.15142	1.07573
Bortala Mongolian Autonomous Prefecture	2010	1.00827	1.00943	1.04199	1.95276	1.32157	1.85461	1.90516	1.64341	1.88228	1.08682	1	1.04376	1.22481	1.27337	1.18201	1.06666
Bortala Mongolian Autonomous Prefecture	2011	1.0063	1.0052	1.04507	1.95232	1.37432	1.83242	1.91772	1.63862	1.89809	1.18996	1	1.05245	1.25349	1.25087	1.27397	1.07595
Bortala Mongolian Autonomous Prefecture	2012	1.00722	1.00615	1.03293	1.94962	1.44525	1.82334	1.9266	1.48982	1.90645	1.23117	1	1.04753	1.27633	1.2609	1.28112	1.08768
Bortala Mongolian Autonomous Prefecture	2013	1.00206	1.02546	1.03375	1.95618	1.51255	1.82404	1.91048	1.56287	1.88649	1.20789	1	1.03952	1.29471	1.23846	1.2771	1.10549
Bortala Mongolian Autonomous Prefecture	2014	1.00026	1.02826	1.03615	1.95661	1.56893	1.49961	1.91863	1.5479	1.89684	1.14378	1.00059	1.03818	1.31796	1.21876	1.27585	1.1214
Bortala Mongolian Autonomous Prefecture	2015	1.00162	1.02555	1.03846	1.93757	1.60349	1.46601	1.94472	1.71527	1.93152	1.13027	1	1.05066	1.32002	1.22384	1.28765	1.14335
Bortala Mongolian Autonomous Prefecture	2016	1.0039	1.02661	1.03138	1.51014	1.60167	1.39895	1.94117	1.6476	1.92558	1.07109	1.01283	1.06406	1.22752	1.23846	1.2199	1.17299
Bortala Mongolian Autonomous Prefecture	2017	1.00385	1.00651	1.03136	1.93092	1.67079	1.39056	1.93779	1.74042	1.92141	1.08519	1	1.07523	1.2853	1.23012	1.58816	1.19489
Bortala Mongolian Autonomous Prefecture	2018	1.00603	1.01101	1.03115	1.93356	1.64533	1.39086	1.94483	1.70499	1.93005	1.07557	1	1.00816	1.25067	1.24282	1.63081	1.21397
Bayangol Mongolian Autonomous Prefecture	2000	1.01219	1.00454	1.00895	1.86565	1.6868	1.57624	1.85349	1.62605	1.85201	1.00976	1	1.01078	1.20123	1.2804	1.08335	1.09571
Bayangol Mongolian Autonomous Prefecture	2001	1.0098	1.00371	1.00656	1.89597	1.68261	1.60299	1.76014	1.64162	1.77785	1.00769	1.00861	1.00284	1.19628	1.29502	1.13024	1.10188
Bayangol Mongolian Autonomous Prefecture	2002	1.01764	1.02506	1.00994	1.89025	1.68152	1.63518	1.8187	1.68653	1.8261	1.00689	1.01737	1.00296	1.15589	1.32692	1.16553	1.10848
Bayangol Mongolian Autonomous Prefecture	2003	1.01626	1.12987	1.02483	1.8976	1.68343	1.62854	1.77925	1.72246	1.75252	1.00416	1.0325	1.00255	1.17675	1.31887	1.18728	1.08575
Bayangol Mongolian Autonomous Prefecture	2004	1.02153	1.00759	1.01066	1.88524	1.68534	1.62612	1.78418	1.80329	1.78973	1.00404	1.00983	1.0069	1.17864	1.32036	1.20737	1.11443
Bayangol Mongolian Autonomous Prefecture	2005	1.02072	1.00379	1.01074	1.89957	1.72899	1.60565	1.82282	1.81527	1.82734	1.00184	1.00102	1.00537	1.1929	1.35611	1.22264	1.07074
Bayangol Mongolian Autonomous Prefecture	2006	1.01431	1.01027	1.01278	1.90233	1.75628	1.57578	1.81364	1.76168	1.81585	1.00487	1.01356	1.00383	1.2037	1.33549	1.24599	1.05703
Bayangol Mongolian Autonomous Prefecture	2007	1.01737	1.00488	1.01488	1.91734	1.73809	1.60434	1.82895	1.77567	1.82888	1.0109	1.00024	1.00468	1.245	1.35243	1.2751	1.06265
Bayangol Mongolian Autonomous Prefecture	2008	1.02811	1.31964	1.08371	1.91838	1.78174	1.58825	1.81284	1.7829	1.82062	1.0149	1	1.00297	1.25086	1.35377	1.28377	1.0623
Bayangol Mongolian Autonomous Prefecture	2009	1.0438	1.27504	1.05865	1.94492	1.71444	1.34348	1.79633	1.79012	1.79514	1.00426	1	1.0032	1.27311	1.35019	1.20597	1.08076
Bayangol Mongolian Autonomous Prefecture	2010	1.06608	1.33609	1.08503	1.94235	1.69807	1.68344	1.77804	1.71078	1.77803	1.00348	1.0211	1.00556	1.31359	1.37871	1.21638	1.08261
Bayangol Mongolian Autonomous Prefecture	2011	1.06704	1.33383	1.09596	1.95251	1.70899	1.59664	1.77768	1.69132	1.77466	1.00363	1.02256	1.0073	1.29735	1.3381	1.33028	1.08388
Bayangol Mongolian Autonomous Prefecture	2012	1.06976	1.21045	1.11155	1.94953	1.69443	1.6667	1.77862	1.70105	1.76995	1.00316	1.02249	1.01349	1.30238	1.33883	1.35222	1.09651
Bayangol Mongolian Autonomous Prefecture	2013	1.08479	1.24172	1.08211	1.94926	1.68898	1.70172	1.75109	1.66108	1.72733	1.00315	1.02177	1.01047	1.32695	1.35711	1.37213	1.09688
Bayangol Mongolian Autonomous Prefecture	2014	1.0816	1.14801	1.08789	1.95014	1.70535	1.70616	1.78988	1.68383	1.7715	1.00329	1.01826	1.00685	1.34863	1.35164	1.38581	1.10003
Bayangol Mongolian Autonomous Prefecture	2015	1.0728	1.1636	1.09386	1.93977	1.68716	1.64145	1.82427	1.67246	1.8118	1.00607	1.01855	1.0087	1.35662	1.34041	1.39268	1.1329
Bayangol Mongolian Autonomous Prefecture	2016	1.06291	1.19268	1.07815	1.65146	1.60531	1.73201	1.83446	1.67814	1.8138	1.00793	1	1.01191	1.3404	1.39876	1.39601	1.17538
Bayangol Mongolian Autonomous Prefecture	2017	1.08653	1.22759	1.05867	1.93738	1.67261	1.75673	1.81988	1.6753	1.78574	1.00713	1.02124	1.01524	1.39218	1.45122	1.73901	1.19092
Bayangol Mongolian Autonomous Prefecture	2018	1.09345	1.19282	1.06233	1.93631	1.73081	1.72347	1.8166	1.67672	1.78534	1.00397	1	1.00129	1.44516	1.48087	1.81049	1.20683
Aksu Administrative Offices	2000	1.01805	1.01856	1.00954	1.73134	1.16679	1.76887	1.92244	1.71826	1.91624	1.00025	1.01001	1.0009	1.06026	1.23125	1.07529	1.02556
Aksu Administrative Offices	2001	1.02626	1.01168	1.00614	1.80798	1.23245	1.77363	1.90403	1.7494	1.90345	1.00202	1	1.01088	1.06603	1.26693	1.18696	1.02849
Aksu Administrative Offices	2002	1.01901	1.01412	1.00913	1.74571	1.25391	1.79524	1.86378	1.73144	1.86843	1	1.00096	1.00817	1.06191	1.26137	1.07636	1.03162
Aksu Administrative Offices	2003	1.02168	1.01679	1.01033	1.82997	1.28592	1.7707	1.86586	1.75838	1.86846	1.00016	1.09467	1.00324	1.06257	1.27966	1.08848	1.03368
Aksu Administrative Offices	2004	1.0299	1.01014	1.01088	1.86195	1.31793	1.80919	1.84994	1.78234	1.84903	1.00068	1.03901	1.02343	1.06001	1.30567	1.09896	1.04661
Aksu Administrative Offices	2005	1.01934	1.00737	1.01682	1.85299	1.28519	1.83198	1.73109	1.79731	1.74063	1.00274	1	1.01449	1.05804	1.31279	1.10102	1.05527
Aksu Administrative Offices	2006	1.02239	1.03106	1.02542	1.86224	1.3052	1.82471	1.69518	1.81437	1.70595	1.0023	1.00326	1.00336	1.07881	1.3128	1.09976	1.05361
Aksu Administrative Offices	2007	1.00748	1.06896	1.01379	1.81742	1.33794	1.81151	1.67441	1.78832	1.68241	1.00236	1	1.00121	1.13239	1.32158	1.10136	1.05918
Aksu Administrative Offices	2008	1.01894	1.02408	1.01832	1.78246	1.38159	1.88877	1.72153	1.86677	1.72622	1.00585	1.0065	1.0017	1.12753	1.30853	1.10442	1.07028
Aksu Administrative Offices	2009	1.05033	1.12922	1.03012	1.81137	1.38341	1.82408	1.70459	1.87695	1.70433	1.00818	1	1.00135	1.15993	1.28358	1.25255	1.0779
Aksu Administrative Offices	2010	1.06251	1.0965	1.02313	1.8436	1.3725	1.79779	1.69022	1.85749	1.69147	1.01233	1	1.00995	1.19134	1.26215	1.25086	1.06714
Aksu Administrative Offices	2011	1.04753	1.09223	1.02157	1.80741	1.42525	1.79614	1.63191	1.82635	1.63866	1.01131	1.00846	1.00635	1.21244	1.24658	1.27473	1.07584
Aksu Administrative Offices	2012	1.0527	1.04907	1.0242	1.81417	1.43616	1.81449	1.64008	1.83802	1.63969	1.01572	1.03408	1.00628	1.22629	1.2417	1.27669	1.08623
Aksu Administrative Offices	2013	1.07714	1.06009	1.0247	1.82993	1.42706	1.84898	1.63031	1.60419	1.61677	1.0144	1.03444	1.0046	1.25523	1.24821	1.27382	1.10476
Aksu Administrative Offices	2014	1.04483	1.12992	1.0269	1.83667	1.47072	1.82874	1.62693	1.66467	1.59919	1.01272	1.03071	1.00205	1.25267	1.21829	1.2663	1.11707
Aksu Administrative Offices	2015	1.04618	1.10383	1.02893	1.84725	1.47435	1.84221	1.71658	1.63443	1.71004	1.00592	1.00497	1.00194	1.26396	1.22801	1.13067	1.12226
Aksu Administrative Offices	2016	1.05115	1.08933	1.02515	1.62631	1.47072	1.83362	1.76274	1.69117	1.76314	1.00354	1.01918	1.00235	1.23312	1.23693	1.1655	1.14891
Aksu Administrative Offices	2017	1.08552	1.03482	1.01648	1.82618	1.55802	1.794	1.75708	1.7479	1.75399	1.00633	1	1.00237	1.27359	1.27769	1.75308	1.15939
Aksu Administrative Offices	2018	1.12524	1.03855	1.01918	1.82578	1.54711	1.7808	1.76085	1.71954	1.75819	1.00506	1	1.00213	1.27745	1.32087	1.83124	1.16067
Kizilsu Kirgiz Autonomous Prefecture	2000	1.0036	1	1	1.5387	1.26082	1.91187	1.92026	1.2491	1.90747	1.08202	1	1.00058	1.09159	1.22693	1.0909	1.01037
Kizilsu Kirgiz Autonomous Prefecture	2001	1.00424	1	1	1.81813	1.39778	1.91997	1.97862	1.17455	1.9744	1.04246	1	1.17295	1.0817	1.27733	1.09537	1.01104
Kizilsu Kirgiz Autonomous Prefecture	2002	1.00648	1	1	1.38011	1.41561	1.90572	1.9745	1.30329	1.96897	1.02487	1	1.15349	1.05944	1.30372	1.1478	1.01232
Kizilsu Kirgiz Autonomous Prefecture	2003	1.00754	1	1	1.64023	1.4368	1.92753	1.9783	1.30928	1.974	1.04062	1	1.02657	1.07197	1.33833	1.12504	1.01371
Kizilsu Kirgiz Autonomous Prefecture	2004	1.00772	1	1	1.64155	1.45798	1.94385	1.96214	1.33024	1.95305	1.09017	1.00131	1.00669	1.06051	1.35058	1.13945	1.01932
Kizilsu Kirgiz Autonomous Prefecture	2005	1.00342	1	1	1.64423	1.45617	1.9472	2	1.4021	2	1.10812	1	1.03235	1.06158	1.35515	1.14654	1.01524
Kizilsu Kirgiz Autonomous Prefecture	2006	1.00252	1	1	1.6191	1.51073	1.95535	1.99825	1.43383	1.99793	1.13151	1	1.08069	1.08821	1.37256	1.14165	1.01783
Kizilsu Kirgiz Autonomous Prefecture	2007	1.00242	1.00254	1	1.59059	1.54529	1.85796	1.9971	1.4021	1.99549	1.27961	1.02648	1.06594	1.14616	1.32811	1.14459	1.01984
Kizilsu Kirgiz Autonomous Prefecture	2008	1.00165	1.0037	1.00139	1.57586	1.57257	1.93628	1.99425	1.46407	1.98991	1.24272	2	1.12983	1.16891	1.24529	1.14898	1.0232
Kizilsu Kirgiz Autonomous Prefecture	2009	1.00057	1.14593	1.02058	1.54724	1.59076	1.88806	1.98936	1.5003	1.98746	1.08709	1.05474	1.10563	1.21648	1.24672	1.33452	1.02526
Kizilsu Kirgiz Autonomous Prefecture	2010	1.00232	1.09676	1.01618	1.48982	1.63987	1.86332	1.94066	1.36886	1.93369	1.0494	1.17254	1.4538	1.24772	1.23574	1.33164	1.02917
Kizilsu Kirgiz Autonomous Prefecture	2011	1.00112	1.10049	1.01987	1.51484	1.66351	1.85154	1.91766	1.38114	1.91097	1.05773	1.10055	1.1499	1.27336	1.20352	1.35847	1.03123
Kizilsu Kirgiz Autonomous Prefecture	2012	1.00391	1.06739	1.01682	1.43852	1.69443	1.85124	1.91022	1.36886	1.88819	1.07445	1.00129	1.12719	1.27798	1.21451	1.37945	1.03563
Kizilsu Kirgiz Autonomous Prefecture	2013	1.00652	1.05701	1.01142	1.52166	1.71626	1.79256	1.88906	1.56826	1.86276	1.09492	1	1.13222	1.25143	1.23025	1.37927	1.03988
Kizilsu Kirgiz Autonomous Prefecture	2014	1.00969	1.03703	1.00765	1.58983	1.73809	1.77153	1.92591	1.52695	1.91074	1.10319	1.07139	1.0788	1.25696	1.24438	1.36732	1.04678
Kizilsu Kirgiz Autonomous Prefecture	2015	1.00842	1.03627	1.0042	1.57033	1.74718	1.78225	1.94846	1.56033	1.92314	1.04845	1.04014	1.07271	1.2948	1.22305	1.35657	1.05437
Kizilsu Kirgiz Autonomous Prefecture	2016	1.00433	1.03939	1.00614	1.89597	1.73263	1.79085	1.93811	1.59371	1.89663	1.05573	1.01078	1.0836	1.35548	1.2256	1.1695	1.06558
Kizilsu Kirgiz Autonomous Prefecture	2017	1.01029	1.02811	1.00387	1.58296	1.79083	1.66556	1.93536	1.61855	1.90554	1.0625	1.00097	1.0726	1.32175	1.24861	1.85527	1.06413
Kizilsu Kirgiz Autonomous Prefecture	2018	1.00619	1.0275	1.00471	1.67629	1.78538	1.65176	1.96158	1.6502	1.9428	1.02292	1.00093	1.01177	1.33372	1.25736	1.9595	1.06723
Kashgar Administrative Offices	2000	1.03403	1.00014	1	1.6133	1.01873	1.82754	1.97094	1.25778	1.96953	1.01938	1.00186	1.26237	1.00091	1.20969	1.27535	1.0091
Kashgar Administrative Offices	2001	1.03376	1.00036	1.00021	1.50467	1.0522	1.84423	1.97973	1.53383	1.97726	1.00581	1.0051	1.14797	1.00256	1.24239	1.06063	1.01015
Kashgar Administrative Offices	2002	1.06363	1.00033	1.00018	1.48759	1.07857	1.82313	1.97068	1.50689	1.9672	1.0036	1.00152	1.09914	1.00091	1.27711	1.05771	1.01121
Kashgar Administrative Offices	2003	1.07896	1.00208	1.00243	1.53138	1.14005	1.82161	1.97035	1.62066	1.96556	1.00708	1.00712	1.07305	1	1.3074	1.07374	1.0154
Kashgar Administrative Offices	2004	1.06873	1.00431	1.00225	1.53918	1.20153	1.80472	1.96843	1.38024	1.96193	1.01245	1.0101	1.20493	1.00725	1.32159	1.07736	1.01937
Kashgar Administrative Offices	2005	1.05164	1.00322	1.0025	1.55185	1.21335	1.79269	1.9604	1.38383	1.95199	1.01823	1.00054	1.05186	1.00997	1.31262	1.07661	1.02451
Kashgar Administrative Offices	2006	1.05641	1.00289	1.00102	1.55334	1.22517	1.79498	1.96394	1.38383	1.95653	1.06522	1.00308	1.0807	1.01401	1.35321	1.07931	1.0308
Kashgar Administrative Offices	2007	1.05836	1.04546	1.00629	1.6309	1.237	1.80394	1.96079	1.38383	1.95264	1.12764	1.01148	1.07989	1.05837	1.37664	1.08063	1.03952
Kashgar Administrative Offices	2008	1.06443	1.02984	1.01205	1.60066	1.24882	1.80681	1.96217	1.45808	1.95409	1.15313	1	1.05091	1.06785	1.34167	1.09741	1.04547
Kashgar Administrative Offices	2009	1.13296	1.1345	1.00483	1.63655	1.26701	1.79649	1.96193	1.58772	1.95443	1.05813	1	1.04254	1.10033	1.33498	1.1049	1.0567
Kashgar Administrative Offices	2010	1.13627	1.10233	1.01068	1.60562	1.2379	1.8544	1.97019	1.58443	1.9646	1.04643	1.00394	1.08971	1.14707	1.31405	1.25745	1.05009
Kashgar Administrative Offices	2011	1.09902	1.10949	1.01104	1.69583	1.35249	1.82567	1.96626	1.50898	1.96008	1.04275	1	1.0836	1.17378	1.27053	1.31041	1.06565
Kashgar Administrative Offices	2012	1.14031	1.07431	1.00691	1.7254	1.38887	1.81742	1.96795	1.5494	1.96149	1.03646	1.00938	1.05907	1.17403	1.28999	1.33854	1.07694
Kashgar Administrative Offices	2013	1.15215	1.0646	1.00797	1.77768	1.44162	1.81968	1.96997	1.47231	1.96314	1.05568	1.00322	1.0311	1.18672	1.30099	1.33891	1.09572
Kashgar Administrative Offices	2014	1.14581	1.05848	1.00759	1.79054	1.4598	1.80895	1.98005	1.39521	1.97521	1.04727	1.00316	1.00891	1.18606	1.28931	1.3334	1.09552
Kashgar Administrative Offices	2015	1.13276	1.05345	1.00724	1.77707	1.47617	1.84041	1.97338	1.4003	1.96796	1.03469	1.0091	1.00929	1.23338	1.27947	1.34235	1.10384
Kashgar Administrative Offices	2016	1.13283	1.05677	1.00703	1.98912	1.38341	1.89491	1.97779	1.44371	1.97408	1.06909	1	1.01141	1.2701	1.29741	1.33652	1.12566
Kashgar Administrative Offices	2017	1.23853	1.04801	1.00732	1.7544	1.43252	1.88072	1.97805	1.42201	1.97457	1.06964	1.00015	1.01773	1.2867	1.36071	1.96487	1.12708
Kashgar Administrative Offices	2018	1.2285	1.0476	1.00693	1.75693	1.4307	1.88026	1.97985	1.43286	1.97635	1.0336	1.00156	1.00152	1.28764	1.39025	1.98028	1.13716
Hotan Administrative Offices	2000	1.0192	1.00555	1.0006	1.27544	1	1.86873	1.94025	1.50389	1.93352	1.0297	1	1.01354	1.01657	1.18584	1	1.00046
Hotan Administrative Offices	2001	1.01811	1.00613	1.00151	1.04009	1.03747	1.91721	1.96091	1.50389	1.95489	1.03016	1	1.02557	1.01739	1.20667	1.09106	1.00006
Hotan Administrative Offices	2002	1.02172	1.00358	1.0001	1	1.07184	1.92378	1.96554	1.42904	1.95812	1.01254	1	1.01925	1.02399	1.21561	1.00349	1.0001
Hotan Administrative Offices	2003	1.03085	1.0114	1.00222	1.18957	1.12032	1.88548	1.97144	1.26737	1.96577	1.0002	1	1.0053	1.03504	1.20232	1.0505	1
Hotan Administrative Offices	2004	1.04707	1.0028	1.00011	1.22458	1.16879	1.86134	1.96874	1.29371	1.96264	1.00499	1	1.05924	1.02597	1.23317	1.05195	1.01291
Hotan Administrative Offices	2005	1.0246	1.01569	1.0005	1.28882	1.18334	1.82381	1.97311	1.30269	1.96781	1.00192	1	1.146	1.03784	1.221	1.05774	1.00692
Hotan Administrative Offices	2006	1.02347	1.02124	1.00197	1.31473	1.27246	1.80474	1.97211	1.3506	1.96619	1.00108	1	1.04065	1.06018	1.21389	1.06053	1.01097
Hotan Administrative Offices	2007	1.02016	2	1.02394	1.33159	1.2761	1.79782	1.96337	1.31287	1.95584	1.00181	1	1.04157	1.03924	1.22747	1.06111	1.01368
Hotan Administrative Offices	2008	1.02916	1.01973	1.00305	1.39439	1.29793	1.77869	1.96796	1.32126	1.9605	1.01344	1	1.0446	1.09357	1.24608	1.06607	1.01573
Hotan Administrative Offices	2009	1.03698	1.03477	1.00644	1.43159	1.35249	1.78294	1.96637	1.32275	1.95565	1.0001	1	1.03619	1.18037	1.24127	1.17502	1.01655
Hotan Administrative Offices	2010	1.05702	1.03118	1.00565	1.48967	1.36704	1.78367	1.97072	1.28563	1.96088	1.00124	1	1.05851	1.22522	1.21916	1.18653	1.01721
Hotan Administrative Offices	2011	1.05169	1.02657	1.00478	1.57235	1.42161	1.82298	1.97789	1.27096	1.96898	1.00057	1.00259	1.079	1.23824	1.1956	1.33972	1.01785
Hotan Administrative Offices	2012	1.13501	1.02391	1.00408	1.58762	1.44162	1.80895	1.98147	1.23982	1.97157	1.00081	1	1.05985	1.26355	1.23421	1.34178	1.01976
Hotan Administrative Offices	2013	1.14804	1.0205	1.00274	1.63603	1.44343	1.81784	1.9709	1.21287	1.95815	1.00121	1	1.01785	1.28367	1.23601	1.34088	1.02117
Hotan Administrative Offices	2014	1.09961	1.01532	1.00222	1.64653	1.4689	1.74102	1.97666	1.21287	1.96603	1.00086	1	1.00556	1.27938	1.18657	1.32446	1.02292
Hotan Administrative Offices	2015	1.1217	1.01344	1.00174	1.66528	1.51801	1.73873	1.977	1.15539	1.95313	1.00067	1.06708	1.0053	1.29397	1.17918	1.3073	1.02368
Hotan Administrative Offices	2016	1.11136	1.01376	1.00352	1.85254	1.50709	1.7313	1.96932	1	1.96209	1.0014	1.00531	1.00655	1.51995	1.16938	1.08452	1.02707
Hotan Administrative Offices	2017	1.15491	1.00706	1.00079	1.66404	1.59985	1.71896	1.97489	1.12365	1.96848	1.00064	1	1.00747	1.35954	1.20185	1.78177	1.02881
Hotan Administrative Offices	2018	1.165	1.00714	1.00157	1.66788	1.59622	1.70137	1.97024	1.06183	1.96281	1.00195	1	1.00121	1.37204	1.22337	1.84159	1.02832
sum		288.38	301.797	288.887	482.981	420.216	462.449	472.331	437.203	466.934	284.045	272.142	281.827	326.4	354.389	353.65	304.886
Rij
Urumqi City	2000	0.00427983	0.00407898	0.00407262	0.00392816	0.00471098	0.0040484	0.00327301	0.00281731	0.00327223	0.00370953	0.00384422	0.00465957	0.00389997	0.00384772	0.00332957	0.00416995
Urumqi City	2001	0.00463551	0.00389022	0.00390636	0.00387465	0.00471747	0.00370314	0.00324022	0.00315218	0.0032353	0.00363122	0.00383987	0.00463426	0.00423083	0.00449629	0.00334644	0.00417676
Urumqi City	2002	0.00461231	0.00405909	0.00424013	0.00388632	0.00471055	0.00385356	0.00328084	0.00328914	0.00326407	0.00363664	0.00382594	0.00458706	0.00409445	0.00452827	0.00381003	0.00424684
Urumqi City	2003	0.00493545	0.00404145	0.00417611	0.00390617	0.00470903	0.00385178	0.00329988	0.0030837	0.00329488	0.003702	0.00373585	0.00393665	0.00459276	0.0046694	0.00393493	0.00421105
Urumqi City	2004	0.00494221	0.00410354	0.00413187	0.00391767	0.00470752	0.00386793	0.00331848	0.00317957	0.00331292	0.00379518	0.00382586	0.00399948	0.00487588	0.00471039	0.00402952	0.00436713
Urumqi City	2005	0.00502593	0.00400899	0.0041592	0.00378915	0.00470752	0.00382652	0.00332827	0.00318642	0.00331258	0.00385943	0.00382757	0.00404533	0.00440359	0.00475611	0.00409337	0.00447856
Urumqi City	2006	0.00532145	0.00392525	0.00399781	0.00389151	0.00471617	0.00379703	0.00335767	0.00289949	0.00333016	0.00380365	0.00407288	0.00412986	0.00481855	0.00485852	0.00391771	0.00459344
Urumqi City	2007	0.00541331	0.00390393	0.00403476	0.00397064	0.00468588	0.00372026	0.00341395	0.00319122	0.00338578	0.0038608	0.00409614	0.00408293	0.00488169	0.00487191	0.00400695	0.00458552
Urumqi City	2008	0.00577988	0.00449339	0.00412497	0.00396826	0.00469453	0.00361845	0.00343022	0.00310561	0.0033765	0.00386664	0.00373261	0.003879	0.00476299	0.00506548	0.00413801	0.00471546
Urumqi City	2009	0.00659495	0.00457618	0.00436241	0.00398662	0.00470752	0.00407517	0.00349744	0.00379248	0.00340558	0.00374545	0.00404055	0.00385326	0.00498777	0.00554363	0.00405542	0.00497959
Urumqi City	2010	0.00693528	0.00453385	0.00435864	0.0039985	0.00470752	0.00400545	0.00350668	0.00383014	0.00340404	0.00381488	0.00378045	0.00408683	0.00449577	0.00564352	0.00418271	0.00489818
Urumqi City	2011	0.00659932	0.00446138	0.00443471	0.00400654	0.00471617	0.0036139	0.00350251	0.00392602	0.00340332	0.00385611	0.00386043	0.00387005	0.00515775	0.00541579	0.00438552	0.00509383
Urumqi City	2012	0.00655202	0.00469479	0.00465531	0.00403021	0.00471617	0.00352668	0.00359679	0.0039808	0.00350323	0.00383936	0.00390487	0.00388931	0.00506834	0.00528515	0.00442774	0.00523699
Urumqi City	2013	0.00661651	0.00495407	0.00463743	0.00402326	0.0047205	0.00352815	0.00369263	0.00404244	0.00361536	0.00373375	0.00388254	0.00387017	0.00506304	0.00522522	0.00447762	0.00549938
Urumqi City	2014	0.00663147	0.0050589	0.0045197	0.0039665	0.00472483	0.00351139	0.00370673	0.00408352	0.0036518	0.00372151	0.00386445	0.00373868	0.0051921	0.00524632	0.00449863	0.00567274
Urumqi City	2015	0.00638334	0.00507431	0.00448573	0.00393772	0.0047205	0.00357709	0.00379663	0.00420679	0.00377085	0.0036549	0.00391137	0.00377725	0.00524387	0.00510334	0.00453904	0.00581466
Urumqi City	2016	0.00628194	0.00533523	0.00452113	0.00394278	0.00472483	0.00348957	0.00386289	0.00424788	0.00384242	0.00364918	0.00370317	0.00410806	0.00524295	0.00501201	0.00448932	0.00641741
Urumqi City	2017	0.00628959	0.00497825	0.00435951	0.00394796	0.00473349	0.00346314	0.00383152	0.00430951	0.00379954	0.0036842	0.00368255	0.0041271	0.00596782	0.0055761	0.00528684	0.00655982
Urumqi City	2018	0.00628457	0.00506609	0.00440145	0.00395883	0.00473782	0.00351021	0.00384646	0.00431636	0.00381144	0.00368154	0.00367575	0.0037763	0.00612746	0.00558909	0.00551968	0.00644178
Karamay City	2000	0.00352761	0.00577105	0.0051178	0.00374912	0.00475643	0.00365522	0.00224158	0.00319259	0.00244748	0.00354728	0.00367455	0.00355297	0.00381663	0.00382891	0.00490169	0.00379197
Karamay City	2001	0.00348707	0.00524715	0.00515075	0.00357468	0.00475946	0.00283442	0.00225394	0.00415885	0.00246674	0.00354722	0.00367455	0.00354966	0.00377116	0.00357919	0.0056553	0.00368806
Karamay City	2002	0.00349715	0.00535245	0.00510852	0.00381913	0.00475859	0.00344906	0.00230951	0.00357676	0.00250211	0.00354408	0.00367455	0.00354966	0.00388987	0.00357765	0.00449733	0.0037378
Karamay City	2003	0.00349397	0.00450851	0.00556511	0.00388765	0.00475902	0.0035051	0.00226767	0.00377536	0.00247407	0.00354612	0.0036841	0.00354907	0.00401135	0.00373492	0.00523366	0.00362595
Karamay City	2004	0.0034896	0.00501566	0.00632547	0.00390211	0.00475946	0.00309783	0.00216787	0.00394656	0.00237834	0.00353808	0.00367455	0.00355062	0.00432883	0.0037853	0.00508273	0.00357208
Karamay City	2005	0.00349497	0.00525767	0.00692311	0.00397071	0.00475513	0.00259019	0.00213578	0.00394656	0.00235576	0.00353654	0.00367491	0.00355222	0.00430812	0.00389473	0.00497743	0.00354869
Karamay City	2006	0.00352751	0.00496806	0.00641769	0.00396549	0.00475513	0.00252239	0.00235453	0.00417323	0.00259709	0.00353194	0.00367455	0.00355038	0.00434322	0.0041002	0.00489854	0.00350507
Karamay City	2007	0.00357575	0.00502845	0.00650849	0.00397504	0.0047508	0.00244029	0.00249663	0.00438005	0.0027236	0.00353714	0.00367474	0.00354962	0.00396589	0.00439099	0.00465952	0.00353246
Karamay City	2008	0.00358157	0.00458044	0.00579754	0.00399084	0.0047508	0.00236724	0.00253884	0.00434101	0.00276881	0.00353296	0.00367455	0.00354946	0.00420987	0.00443148	0.0046526	0.00347239
Karamay City	2009	0.00358082	0.00563844	0.00687371	0.0039889	0.00474214	0.00274678	0.0023843	0.00437594	0.00261701	0.00354546	0.00367455	0.00354971	0.00415431	0.00442812	0.00488364	0.00365448
Karamay City	2010	0.00355677	0.00487912	0.00662812	0.00408193	0.0047508	0.0026115	0.00223869	0.00438484	0.00244788	0.00354632	0.00367455	0.00355037	0.00365246	0.00438339	0.00496278	0.00360389
Karamay City	2011	0.00354336	0.00480735	0.00660283	0.00408034	0.00474647	0.0025429	0.00219256	0.00438553	0.00242727	0.00355714	0.00372478	0.00355006	0.00411491	0.00430202	0.0050483	0.00363296
Karamay City	2012	0.00353332	0.00581922	0.00552325	0.00407423	0.00474647	0.00242258	0.00223457	0.00438621	0.00246199	0.00353849	0.00373022	0.00355339	0.00392674	0.00420997	0.00543131	0.00370962
Karamay City	2013	0.00353983	0.00471041	0.00543198	0.0041025	0.00474647	0.00236477	0.00220327	0.00438689	0.00244019	0.00357539	0.00372711	0.00355454	0.00390831	0.00424135	0.00556657	0.00379835
Karamay City	2014	0.00354371	0.00555553	0.00535806	0.0040621	0.00474647	0.0021624	0.00211716	0.00439443	0.00236141	0.00355645	0.00367455	0.00355768	0.00398938	0.00421752	0.00555932	0.00385407
Karamay City	2015	0.00353645	0.00562398	0.00528728	0.004056	0.00473782	0.00261667	0.00239179	0.00441429	0.00260758	0.00352955	0.00367455	0.0035662	0.00397044	0.00415092	0.0055465	0.00425132
Karamay City	2016	0.00354684	0.00493679	0.00502804	0.00406528	0.00473349	0.00231729	0.00233586	0.00439717	0.00253848	0.0035341	0.00472862	0.00356971	0.00404142	0.00422721	0.00520136	0.00442818
Karamay City	2017	0.00354997	0.00485681	0.00519902	0.00406886	0.00474214	0.00238389	0.00249023	0.00439511	0.00267824	0.00352846	0.00367455	0.00357236	0.00414655	0.00424022	0.00543612	0.00423493
Karamay City	2018	0.00359816	0.00454507	0.00502387	0.00407469	0.00474647	0.0023928	0.00259176	0.00441155	0.00275137	0.00352993	0.00367455	0.00356616	0.00420976	0.00440788	0.00565446	0.00405832
Turpan City	2000	0.00348145	0.00341134	0.0035009	0.00361748	0.00423226	0.00335359	0.00390346	0.00358635	0.00396248	0.00353591	0.00368835	0.00406528	0.00325846	0.00354287	0.00305566	0.00346413
Turpan City	2001	0.00347842	0.00341289	0.00350596	0.00370232	0.00429805	0.00335932	0.00400614	0.00364525	0.00405643	0.00352615	0.00367455	0.0039814	0.00327614	0.00356203	0.00304181	0.0034581
Turpan City	2002	0.00349944	0.00342024	0.00352925	0.00368155	0.00429892	0.00345905	0.00404888	0.00414516	0.00409006	0.00352247	0.00372649	0.00385954	0.00334433	0.00359946	0.0030772	0.00359739
Turpan City	2003	0.00350267	0.00341593	0.00351581	0.00374766	0.00429113	0.00340732	0.00406566	0.00440538	0.00410325	0.00352373	0.00372017	0.00367191	0.00338524	0.00357136	0.00308367	0.00345621
Turpan City	2004	0.00348518	0.00334389	0.00348991	0.00391891	0.00428334	0.00336731	0.00398723	0.00440538	0.00404566	0.00352485	0.00367455	0.0040653	0.00333397	0.00355068	0.00308471	0.00354585
Turpan City	2005	0.0034816	0.00333416	0.00348636	0.00395872	0.00432229	0.0032919	0.00394114	0.00442593	0.00400591	0.00352174	0.00381839	0.00379298	0.00334433	0.00351626	0.00308582	0.00355612
Turpan City	2006	0.0034744	0.00350656	0.00363995	0.00395141	0.00436991	0.00332493	0.00391255	0.00298166	0.00397094	0.00352258	0.00367455	0.00387254	0.00333221	0.00346772	0.00313792	0.00356732
Turpan City	2007	0.00347529	0.00356901	0.00379302	0.00394202	0.00435692	0.00338015	0.00382503	0.00350144	0.00384118	0.00352277	0.00368154	0.00414525	0.00329887	0.00339488	0.00311565	0.00355918
Turpan City	2008	0.00347182	0.00368874	0.0035432	0.00391886	0.00436991	0.00340866	0.00375242	0.00349801	0.00375206	0.00352294	0.00369607	0.00373919	0.00332033	0.0033589	0.00314498	0.00357077
Turpan City	2009	0.003514	0.00542864	0.00363003	0.00388802	0.00420543	0.00384884	0.00372109	0.00349972	0.00370345	0.003525	0.00368502	0.00378964	0.00330417	0.00336789	0.00352263	0.00371042
Turpan City	2010	0.00349934	0.00494177	0.00365911	0.00381058	0.00419244	0.00388419	0.00350047	0.00319892	0.00344314	0.00352374	0.00367455	0.00433179	0.00333726	0.00332635	0.00360298	0.00372687
Turpan City	2011	0.00350967	0.00499363	0.00365976	0.00379308	0.00424438	0.00378998	0.00334906	0.00289812	0.00325139	0.00352905	0.00367455	0.00417756	0.00337464	0.00331135	0.00384815	0.0036256
Turpan City	2012	0.00351574	0.00561615	0.00387553	0.00381272	0.0041708	0.00382898	0.00332073	0.00266254	0.00319609	0.00352912	0.00370689	0.00403643	0.00344182	0.00333633	0.00398168	0.00366542
Turpan City	2013	0.00349974	0.0055439	0.00398384	0.00382433	0.0041102	0.00383437	0.00326041	0.00375892	0.0031235	0.00354181	0.00370861	0.003736	0.00361129	0.00328461	0.00395377	0.0036963
Turpan City	2014	0.00350232	0.00516837	0.00392113	0.00383826	0.00407125	0.00392001	0.00339452	0.00391301	0.0032452	0.00352899	0.00367534	0.00370952	0.00370019	0.00326712	0.00391962	0.00379934
Turpan City	2015	0.00351067	0.0052646	0.00383445	0.00380227	0.0038202	0.00431863	0.00355943	0.00420747	0.00342825	0.00353259	0.00373883	0.00374398	0.00378531	0.00326483	0.00378476	0.00408682
Turpan City	2016	0.00350883	0.00481028	0.00382621	0.00380026	0.00379423	0.00424127	0.00343474	0.0042424	0.00325964	0.00352665	0.00367455	0.00377755	0.003872	0.00332655	0.00373509	0.00413285
Turpan City	2017	0.00349432	0.00422523	0.00378778	0.00380506	0.00400632	0.00410719	0.00321089	0.00408284	0.00293565	0.00352267	0.00367455	0.00378894	0.00404458	0.00332293	0.00510352	0.00413408
Turpan City	2018	0.00350123	0.00384691	0.00373673	0.00381731	0.00407991	0.00403547	0.0032359	0.00416262	0.00292037	0.00352711	0.00367535	0.00376649	0.0040455	0.00336328	0.00542365	0.00411598
Hami City	2000	0.00349551	0.0033501	0.00351451	0.00338329	0.00391976	0.00400983	0.00380907	0.00384589	0.00376986	0.0036249	0.00373356	0.00355743	0.00365751	0.00368224	0.00326501	0.00356952
Hami City	2001	0.00348443	0.00340478	0.00348433	0.00388984	0.00400806	0.00405727	0.00381979	0.00388493	0.0037665	0.00364142	0.00368477	0.0035679	0.00363983	0.00361616	0.00334337	0.0035835
Hami City	2002	0.00350073	0.00339924	0.00348881	0.00341462	0.00405783	0.0041082	0.00379783	0.00392602	0.0037471	0.00358598	0.00368651	0.00357356	0.00367519	0.00373253	0.00327114	0.00359955
Hami City	2003	0.00350252	0.00339052	0.00348178	0.00353228	0.00402991	0.0041243	0.00378304	0.00396711	0.00372484	0.00360272	0.00368032	0.00354924	0.00360599	0.00372897	0.00331329	0.00360455
Hami City	2004	0.00349671	0.0033562	0.00348378	0.00360808	0.004002	0.00413478	0.00370524	0.00409037	0.00361741	0.0035647	0.00374551	0.00359897	0.00373277	0.00387508	0.00339196	0.00365692
Hami City	2005	0.00347887	0.0033365	0.00347085	0.00366744	0.00407991	0.0039671	0.00371123	0.00383699	0.00363994	0.00355159	0.00371974	0.00377778	0.00362266	0.00384397	0.00348135	0.0036297
Hami City	2006	0.00347877	0.00335619	0.00348717	0.00371563	0.00411453	0.00390949	0.00367994	0.00383494	0.00359757	0.00357511	0.0038299	0.00380885	0.00365397	0.00385072	0.00364062	0.0036749
Hami City	2007	0.00347629	0.00336885	0.00350132	0.0037473	0.00410155	0.00391296	0.00372735	0.00402942	0.00365217	0.00356858	0.00369757	0.00371296	0.00371307	0.00382726	0.00364962	0.00373536
Hami City	2008	0.00347529	0.00333725	0.00352923	0.00388705	0.0041708	0.00327422	0.00374793	0.00419857	0.00368359	0.00355403	0.00417568	0.00367932	0.00375778	0.00378033	0.003685	0.00373829
Hami City	2009	0.00349164	0.00355425	0.00365825	0.00388733	0.00410155	0.00389858	0.00364444	0.00428075	0.00356965	0.00355195	0.00377456	0.00366835	0.00374389	0.00377206	0.00342997	0.00386089
Hami City	2010	0.00349457	0.00346853	0.00364188	0.0038878	0.00414916	0.00392933	0.00365503	0.00426294	0.00357721	0.00352887	0.00405814	0.00374909	0.00381839	0.00373043	0.003513	0.0038823
Hami City	2011	0.00349035	0.00345991	0.00367601	0.0039082	0.00420543	0.00389556	0.00362922	0.00436772	0.00352716	0.00352783	0.00391904	0.00370518	0.00397195	0.00365021	0.00378371	0.00394481
Hami City	2012	0.00349139	0.00346141	0.00362895	0.00390596	0.00424005	0.0037375	0.00351296	0.00441703	0.00340898	0.00352639	0.00390274	0.00370326	0.00394644	0.00370607	0.00380502	0.00407075
Hami City	2013	0.0035136	0.00350055	0.00361248	0.00393774	0.00428767	0.00355285	0.00305265	0.00438758	0.00288125	0.00353511	0.00380164	0.00365769	0.00397726	0.00373508	0.00382065	0.00417548
Hami City	2014	0.00351678	0.0034305	0.00360352	0.00393195	0.00436125	0.00340891	0.00241603	0.00422528	0.00214163	0.00358052	0.0037638	0.00359936	0.00401262	0.0037178	0.00382677	0.00430022
Hami City	2015	0.00352224	0.00352904	0.00359116	0.0039194	0.00436991	0.00345342	0.00296135	0.00405545	0.00277583	0.00358238	0.00388017	0.00360786	0.00412299	0.00373201	0.00385194	0.00448179
Hami City	2016	0.00351529	0.00364926	0.00360668	0.00392661	0.00435692	0.00339241	0.00284585	0.00413351	0.00264176	0.00360775	0.00367756	0.00361989	0.00385246	0.00385586	0.00372494	0.00467676
Hami City	2017	0.00350615	0.00351793	0.0035999	0.00392677	0.00442185	0.00335263	0.00305117	0.00412324	0.00287513	0.00353622	0.00367941	0.00361227	0.00386944	0.00386086	0.00474853	0.00465866
Hami City	2018	0.00351092	0.00355712	0.00359765	0.00393079	0.00444349	0.00330769	0.00277228	0.00412838	0.00256836	0.00353581	0.00370059	0.00355111	0.0039071	0.00383565	0.00485543	0.00465595
Changji Hui Autonomous Prefecture	2000	0.00356353	0.00336372	0.00349306	0.00404763	0.00320991	0.00392268	0.00380321	0.0035254	0.00376023	0.0036516	0.00376329	0.00355035	0.00327866	0.0035962	0.00334916	0.0035055
Changji Hui Autonomous Prefecture	2001	0.0035049	0.00342344	0.00348365	0.00404263	0.00337958	0.00391264	0.00385321	0.00323436	0.00381965	0.00358048	0.00372729	0.0035502	0.00329887	0.00355987	0.00312994	0.00351901
Changji Hui Autonomous Prefecture	2002	0.00354714	0.00334863	0.00348748	0.00405087	0.00339126	0.00390094	0.00387837	0.00356307	0.00385257	0.00364172	0.00367708	0.00354994	0.00338474	0.0036773	0.00325273	0.00354535
Changji Hui Autonomous Prefecture	2003	0.00358773	0.00340621	0.00349811	0.00410034	0.00342394	0.00396017	0.0038913	0.00368633	0.00383985	0.0037174	0.00383459	0.00354968	0.00344409	0.00373945	0.00321104	0.00354242
Changji Hui Autonomous Prefecture	2004	0.0036318	0.00334281	0.00348544	0.00412954	0.00345662	0.00392851	0.00383322	0.00367949	0.00377161	0.00363839	0.00373916	0.00354983	0.00356558	0.0038501	0.00330174	0.00362922
Changji Hui Autonomous Prefecture	2005	0.00361237	0.00336683	0.00348995	0.00408633	0.00340901	0.00391725	0.00388121	0.00377536	0.00385534	0.00375607	0.00372812	0.00354912	0.00359715	0.00385842	0.0033144	0.00365843
Changji Hui Autonomous Prefecture	2006	0.00369167	0.00437412	0.00361519	0.00408225	0.00347394	0.003921	0.00388153	0.00361854	0.00385303	0.00386847	0.00372437	0.00355029	0.00358528	0.00393805	0.00332171	0.00371265
Changji Hui Autonomous Prefecture	2007	0.00378641	0.00377794	0.00359824	0.0039976	0.00342632	0.00388339	0.00385735	0.00383425	0.0038241	0.00408789	0.00373893	0.00354835	0.00370878	0.00409342	0.00336496	0.00382375
Changji Hui Autonomous Prefecture	2008	0.00385726	0.00361582	0.00358924	0.0040285	0.00346961	0.00390614	0.00377347	0.004089	0.00372624	0.00415144	0.00409778	0.00354828	0.0039323	0.00414772	0.00342408	0.00390025
Changji Hui Autonomous Prefecture	2009	0.00381791	0.00380433	0.00363322	0.00402435	0.00348259	0.00396705	0.00369831	0.00410475	0.00363553	0.00385908	0.00386187	0.00354834	0.00399771	0.00412819	0.00383472	0.00403813
Changji Hui Autonomous Prefecture	2010	0.00381911	0.00402541	0.00362253	0.00411284	0.00348259	0.00395182	0.00360117	0.00410475	0.00352908	0.00376543	0.00379915	0.00355106	0.0040452	0.00405992	0.00392163	0.00406184
Changji Hui Autonomous Prefecture	2011	0.00395524	0.0041332	0.00362326	0.00414066	0.00359946	0.00396882	0.00348857	0.00388972	0.00339538	0.0037093	0.00381314	0.0035556	0.00414092	0.00422317	0.00383142	0.00413066
Changji Hui Autonomous Prefecture	2012	0.00396249	0.00423604	0.00374392	0.00414095	0.00362543	0.00399183	0.00352577	0.00412598	0.00341758	0.00367864	0.00380834	0.00357028	0.00425912	0.00423448	0.00385555	0.0042552
Changji Hui Autonomous Prefecture	2013	0.00396801	0.00437844	0.00368733	0.00412744	0.00366871	0.00410081	0.00334101	0.00412598	0.00310225	0.00362177	0.00379755	0.00356531	0.00424472	0.00426614	0.00390134	0.00445022
Changji Hui Autonomous Prefecture	2014	0.00395241	0.00392371	0.00364921	0.00411844	0.00378991	0.00399599	0.00325838	0.00412804	0.00295109	0.00360094	0.00382125	0.00356349	0.00423007	0.0041812	0.00393911	0.00468531
Changji Hui Autonomous Prefecture	2015	0.0040249	0.00400871	0.0036122	0.00409069	0.00382453	0.00404786	0.00324353	0.00413557	0.00287894	0.00359607	0.00375622	0.00357059	0.00426745	0.00427801	0.00397129	0.00492055
Changji Hui Autonomous Prefecture	2016	0.00396284	0.00415209	0.00361921	0.00407492	0.00390677	0.00405213	0.00327032	0.0040349	0.00288957	0.0035863	0.00371789	0.00357469	0.00408932	0.00417818	0.00365953	0.00516028
Changji Hui Autonomous Prefecture	2017	0.00397988	0.00457935	0.00364461	0.00406017	0.00401065	0.00401597	0.00328624	0.00417186	0.00292992	0.00355574	0.00369185	0.00357858	0.00413518	0.00416191	0.00472438	0.00533121
Changji Hui Autonomous Prefecture	2018	0.00398619	0.00437293	0.00360978	0.00404412	0.00405826	0.00389222	0.0033299	0.00410338	0.00301161	0.0035629	0.00367765	0.00359105	0.0042165	0.00418224	0.00486242	0.00523155
prefectures and cities directly under Ili Kazak Autonomous Prefecture	2000	0.00358157	0.00348966	0.00350353	0.00396898	0.00297661	0.00377011	0.00402332	0.00437731	0.00402457	0.00386846	0.00367782	0.00362569	0.00319784	0.00356422	0.00314694	0.00341669
prefectures and cities directly under Ili Kazak Autonomous Prefecture	2001	0.00361828	0.00339995	0.00349749	0.00376993	0.0032164	0.00377432	0.00396664	0.00361785	0.00395575	0.00365689	0.00369456	0.0036544	0.00327108	0.00282176	0.00316254	0.00340321
Counties (Cities) Direct Under Ili Prefecture	2002	0.00363249	0.00338722	0.00350526	0.00387116	0.0032731	0.00382894	0.00395284	0.0041657	0.00394008	0.00372367	0.00367455	0.0036176	0.00331655	0.00347024	0.00318547	0.00342349
Counties (Cities) Direct Under Ili Prefecture	2003	0.00362817	0.00343962	0.00352107	0.00383604	0.00338001	0.00384489	0.00398611	0.00419309	0.00398039	0.00409235	0.003679	0.00360274	0.00333069	0.00350549	0.00319821	0.00340333
Counties (Cities) Direct Under Ili Prefecture	2004	0.00362613	0.00343856	0.00352384	0.00382144	0.00348692	0.0038263	0.00397116	0.00419309	0.00395879	0.00408801	0.00380983	0.00366221	0.00333322	0.00352294	0.00321971	0.00343439
Counties (Cities) Direct Under Ili Prefecture	2005	0.00364029	0.00354695	0.00353096	0.00387979	0.00360812	0.0035955	0.00391623	0.00415817	0.00389541	0.00440436	0.00377575	0.0037753	0.00333801	0.0035527	0.00323623	0.00343796
Counties (Cities) Direct Under Ili Prefecture	2006	0.00363518	0.00342884	0.00352708	0.00388974	0.00367737	0.00357299	0.00384467	0.00417803	0.00380932	0.00439863	0.00370985	0.00363645	0.00336958	0.00355493	0.00325793	0.00345726
Counties (Cities) Direct Under Ili Prefecture	2007	0.00362867	0.00343366	0.00352401	0.00385885	0.00368603	0.0035463	0.00384936	0.00421775	0.00380447	0.00433142	0.00369781	0.00361503	0.00342313	0.00353523	0.00330192	0.00347346
Counties (Cities) Direct Under Ili Prefecture	2008	0.00369172	0.00343247	0.00352978	0.0038479	0.00376394	0.00353694	0.00387071	0.00405682	0.0038249	0.00499466	0.0037256	0.00365361	0.0034691	0.0035492	0.00332662	0.00349676
Counties (Cities) Direct Under Ili Prefecture	2009	0.00378567	0.00358391	0.00357157	0.00382487	0.00372498	0.00352777	0.00383507	0.00411982	0.00376892	0.00425877	0.00384406	0.00366256	0.00356103	0.00357614	0.00320841	0.00353943
Counties (Cities) Direct Under Ili Prefecture	2010	0.00385349	0.00350968	0.00356058	0.00382483	0.00372498	0.00356219	0.00377963	0.00412324	0.00369732	0.00430821	0.00408171	0.00395056	0.00373934	0.00356713	0.00321423	0.00355063
Counties (Cities) Direct Under Ili Prefecture	2011	0.00376132	0.00350453	0.00357022	0.00389131	0.00375961	0.00350273	0.00380151	0.00413831	0.00372111	0.00422842	0.00376178	0.00475759	0.0036863	0.00349798	0.00356463	0.00357529
Counties (Cities) Direct Under Ili Prefecture	2012	0.00378651	0.00363139	0.00357644	0.00389521	0.00374662	0.00349547	0.00379931	0.00415269	0.00372014	0.0041275	0.00375963	0.00472065	0.00380678	0.00349126	0.00357709	0.0036229
Counties (Cities) Direct Under Ili Prefecture	2013	0.00382119	0.00393521	0.00362834	0.00391427	0.00374662	0.00351341	0.00366006	0.004265	0.00355066	0.00418438	0.00374309	0.00473527	0.00384895	0.0034849	0.00357607	0.00365615
Counties (Cities) Direct Under Ili Prefecture	2014	0.00379998	0.00362914	0.0035991	0.00390596	0.00373797	0.0036376	0.00363884	0.00427048	0.00350529	0.00415716	0.00370272	0.00467414	0.00387977	0.00347026	0.00357425	0.00370938
Counties (Cities) Direct Under Ili Prefecture	2015	0.00384251	0.00372593	0.0035755	0.00387691	0.00376826	0.00369844	0.00384811	0.00402395	0.00378167	0.00387199	0.00374925	0.0047997	0.00397852	0.00347474	0.00358	0.00375283
Counties (Cities) Direct Under Ili Prefecture	2016	0.00383908	0.00386727	0.00360608	0.00402492	0.00374229	0.00369134	0.00384685	0.00401436	0.00377416	0.00389339	0.00397009	0.00527218	0.00373736	0.00348234	0.00331851	0.0038606
Counties (Cities) Direct Under Ili Prefecture	2017	0.00388762	0.00361119	0.00360236	0.00387276	0.00392409	0.00365484	0.00385407	0.00393081	0.0037791	0.00390053	0.00417217	0.005436	0.00379159	0.00355647	0.00453159	0.003911
Counties (Cities) Direct Under Ili Prefecture	2018	0.00394053	0.00362001	0.00359371	0.00387639	0.00395871	0.00344707	0.00388589	0.00397258	0.00381432	0.00388511	0.00375453	0.00709656	0.00383739	0.00360506	0.00487175	0.0039387
Tarbagatai Administrative Offices	2000	0.00350704	0.003323	0.00347884	0.00393856	0.00316316	0.00403738	0.00410939	0.00365963	0.00413029	0.00372727	0.00367866	0.00355132	0.00329382	0.00362187	0.00336838	0.00345454
Tarbagatai Administrative Offices	2001	0.00348925	0.0033221	0.00347429	0.00399808	0.00316359	0.00411311	0.0041121	0.00365209	0.00413239	0.00370649	0.00367455	0.00355499	0.00326098	0.00360266	0.00393594	0.00347139
Tarbagatai Administrative Offices	2002	0.00349944	0.0033172	0.00347232	0.0040238	0.00317182	0.00412176	0.00408622	0.00358361	0.00410104	0.00367039	0.00367455	0.00355232	0.00329129	0.00364	0.00345447	0.00348929
Tarbagatai Administrative Offices	2003	0.00350277	0.00331764	0.00346707	0.00411622	0.00317138	0.00414293	0.004078	0.00378906	0.00409353	0.00401144	0.00367455	0.00354958	0.00325138	0.00365073	0.00325569	0.00340524
Tarbagatai Administrative Offices	2004	0.00347619	0.00331903	0.00346702	0.00386557	0.00317095	0.00419321	0.00407378	0.0037959	0.00408593	0.00381199	0.00367455	0.00356455	0.00330872	0.00366203	0.00325559	0.00340732
Tarbagatai Administrative Offices	2005	0.00348299	0.00334165	0.00348011	0.00378939	0.00299782	0.00422528	0.00409572	0.00378906	0.00410865	0.00387018	0.00367455	0.00358944	0.00330518	0.00367635	0.00321958	0.00344526
Tarbagatai Administrative Offices	2006	0.00346973	0.00331825	0.00346748	0.00399802	0.00305841	0.00417311	0.00408839	0.0034987	0.00409911	0.00377559	0.00369133	0.00360736	0.00337792	0.00366673	0.00322871	0.00346122
Tarbagatai Administrative Offices	2007	0.00346764	0.00332289	0.00347252	0.00399088	0.00318394	0.00421789	0.00408841	0.00389863	0.0040966	0.00381431	0.00367688	0.00355622	0.00340368	0.00367287	0.0031902	0.0034772
Tarbagatai Administrative Offices	2008	0.00347301	0.00334071	0.00347026	0.00387392	0.00331812	0.00417056	0.00410988	0.00406229	0.00412013	0.00378093	0.00367754	0.00356446	0.00346379	0.00364264	0.00320005	0.00349692
Tarbagatai Administrative Offices	2009	0.00349253	0.00366626	0.00360416	0.00390361	0.00320125	0.00414188	0.00412785	0.00408215	0.004145	0.00371573	0.00368572	0.00356155	0.00347996	0.00361818	0.00356868	0.00354125
Tarbagatai Administrative Offices	2010	0.00349681	0.0035518	0.00357014	0.00411767	0.00317095	0.00404882	0.00407508	0.00409174	0.00407809	0.00364589	0.00367455	0.00360517	0.00338221	0.0035839	0.00357807	0.00353454
Tarbagatai Administrative Offices	2011	0.00350411	0.00356126	0.00359622	0.00412924	0.00325319	0.00408662	0.00406446	0.00412667	0.00406853	0.00360117	0.00367455	0.00359959	0.00355648	0.00357944	0.00361907	0.0035812
Tarbagatai Administrative Offices	2012	0.003498	0.00335909	0.00350411	0.00408273	0.00324886	0.00403022	0.00404521	0.00414173	0.00404542	0.003577	0.00371098	0.00359577	0.00365094	0.00357432	0.00363608	0.00362311
Tarbagatai Administrative Offices	2013	0.00350172	0.00338956	0.0035095	0.00407077	0.0032705	0.00413087	0.00405342	0.00425062	0.00405564	0.00365343	0.00369291	0.00360673	0.00369539	0.00353556	0.00365302	0.00368512
Tarbagatai Administrative Offices	2014	0.0035133	0.0034545	0.00351346	0.00406164	0.00326185	0.00405917	0.00404601	0.00423213	0.00404883	0.00360869	0.00370309	0.00360133	0.00379389	0.00350706	0.00366974	0.00375423
Tarbagatai Administrative Offices	2015	0.00351534	0.0034307	0.00351728	0.00402512	0.00320991	0.00416377	0.0041104	0.00431567	0.00412765	0.00355971	0.00367464	0.00361737	0.00391285	0.00354138	0.00370157	0.00391137
Tarbagatai Administrative Offices	2016	0.0035132	0.0034116	0.00351366	0.00406066	0.00310603	0.00420558	0.00411374	0.00421877	0.00414012	0.00358559	0.00406159	0.00364059	0.00380394	0.00352771	0.00337117	0.00403114
Tarbagatai Administrative Offices	2017	0.00350649	0.0033955	0.00351191	0.00403358	0.00329215	0.00418216	0.00409633	0.00412187	0.004125	0.00361284	0.00367455	0.00365214	0.0038279	0.00349478	0.00468921	0.00410917
Tarbagatai Administrative Offices	2018	0.0035134	0.00342039	0.0035144	0.0040522	0.00313632	0.00409851	0.00411057	0.00417032	0.00413751	0.00358007	0.00370586	0.0037057	0.00395251	0.0035243	0.00505814	0.00408562
Altay Administrative Offices	2000	0.00348414	0.0033417	0.00348609	0.00367379	0.00314801	0.00422868	0.0040816	0.00377741	0.00408416	0.00375515	0.00368111	0.00361826	0.00352365	0.00363538	0.00337435	0.00347913
Altay Administrative Offices	2001	0.00348091	0.00332561	0.00346156	0.0037695	0.00318524	0.00419074	0.00409294	0.00380275	0.00409633	0.00366918	0.00367455	0.00359859	0.00346556	0.00360958	0.00347159	0.00349276
Altay Administrative Offices	2002	0.00348896	0.00332976	0.00346623	0.00378342	0.003248	0.00418012	0.00410163	0.00385754	0.004109	0.00366444	0.00373851	0.00365814	0.00338726	0.00366019	0.00338416	0.00351177
Altay Administrative Offices	2003	0.00348995	0.00333067	0.00346831	0.00386902	0.00332418	0.00410587	0.00412787	0.00387123	0.00414239	0.00411605	0.00367455	0.00361815	0.00330872	0.00365218	0.00344707	0.00357468
Altay Administrative Offices	2004	0.00349537	0.00334501	0.00347773	0.0037951	0.00340035	0.00395344	0.00414286	0.00390547	0.00416072	0.00372246	0.00367455	0.00364512	0.00339686	0.00366289	0.0034652	0.00356189
Altay Administrative Offices	2005	0.00346829	0.00346101	0.00350462	0.00385457	0.00342632	0.00401977	0.00411707	0.00390547	0.00412462	0.00357993	0.00367455	0.0037054	0.00327462	0.00360267	0.00349935	0.00360764
Altay Administrative Offices	2006	0.00347529	0.00333157	0.00347382	0.00379799	0.003712	0.00370633	0.00413256	0.00382809	0.0041405	0.00354859	0.00367455	0.00364455	0.00333877	0.00358658	0.00361238	0.00360422
Altay Administrative Offices	2007	0.00347877	0.00331892	0.00346352	0.00368367	0.0038202	0.00362656	0.0041027	0.0037555	0.00410212	0.00356034	0.00367455	0.00362489	0.00337842	0.00352979	0.00357163	0.0036221
Altay Administrative Offices	2008	0.00347415	0.00332147	0.00346524	0.00364562	0.00385916	0.00355051	0.0040931	0.00391027	0.00409114	0.0036809	0.00418981	0.00359667	0.0034355	0.0034864	0.00359969	0.00363813
Altay Administrative Offices	2009	0.00349805	0.00339617	0.00354366	0.00363636	0.00375095	0.00381357	0.004082	0.00387808	0.00407643	0.00378475	0.00368399	0.00358963	0.00351986	0.00343345	0.00347702	0.00370443
Altay Administrative Offices	2010	0.00352756	0.00335515	0.00351348	0.0037785	0.00382453	0.0037973	0.00406028	0.00401367	0.00404858	0.00385536	0.00451885	0.0037486	0.0036618	0.00344411	0.00350699	0.00373229
Altay Administrative Offices	2011	0.00356323	0.00335357	0.00352221	0.00372742	0.00390677	0.0037404	0.00403008	0.00457453	0.00400765	0.00385006	0.00381995	0.00381825	0.00364539	0.00343265	0.00385923	0.00375564
Altay Administrative Offices	2012	0.00357302	0.003388	0.00353814	0.0037549	0.0039111	0.00367322	0.00412169	0.00268857	0.0041177	0.00381719	0.00385183	0.00391714	0.00376182	0.00348675	0.00389008	0.00381812
Altay Administrative Offices	2013	0.00356522	0.00340535	0.00352676	0.00379228	0.00392409	0.00383497	0.00409751	0.00254476	0.00411373	0.00383726	0.00384742	0.00412434	0.00384163	0.00345847	0.00390285	0.00388969
Altay Administrative Offices	2014	0.00355076	0.00341443	0.00353075	0.00381159	0.00393707	0.00390689	0.00399446	0.00401504	0.00401435	0.00393084	0.00385651	0.00408458	0.00388078	0.00341403	0.00388721	0.00397228
Altay Administrative Offices	2015	0.00354306	0.00344555	0.00353691	0.00380308	0.00386349	0.00404766	0.00407526	0.00402805	0.00411376	0.0037567	0.00383979	0.00425228	0.00408258	0.00343396	0.00388791	0.00411664
Altay Administrative Offices	2016	0.00350635	0.00347865	0.00352708	0.00383215	0.00378991	0.00410187	0.0040274	0.00406195	0.00406354	0.00380265	0.00367455	0.00440521	0.0037408	0.00338991	0.00359513	0.00433481
Altay Administrative Offices	2017	0.00350297	0.00338637	0.00351793	0.00379827	0.00401065	0.00410585	0.00399034	0.00409585	0.00402146	0.00381024	0.00367455	0.00449937	0.00379796	0.00338633	0.00481408	0.00434512
Altay Administrative Offices	2018	0.00350709	0.00341644	0.00351972	0.0039388	0.00398901	0.0041063	0.00398593	0.0040789	0.00401635	0.00373663	0.00367455	0.00382621	0.00379934	0.00341965	0.00504557	0.00433158
Bortala Mongolian Autonomous Prefecture	2000	0.00347962	0.00337785	0.00349078	0.004008	0.00293159	0.00428535	0.00406892	0.00330284	0.00408084	0.00508479	0.00370216	0.00355814	0.00339989	0.00361977	0.00309978	0.00344565
Bortala Mongolian Autonomous Prefecture	2001	0.00348255	0.00343713	0.0034985	0.00400148	0.00305582	0.00430334	0.00407513	0.00340556	0.00409022	0.00485907	0.00367455	0.00355272	0.00340747	0.00372939	0.00313929	0.00346912
Bortala Mongolian Autonomous Prefecture	2002	0.00350327	0.00342291	0.00350464	0.00391756	0.00311685	0.00429744	0.00407079	0.00369318	0.00408519	0.00574864	0.00367455	0.00355464	0.00345798	0.00377564	0.00312342	0.00349475
Bortala Mongolian Autonomous Prefecture	2003	0.00348215	0.0035313	0.00351147	0.00399063	0.00306599	0.0043248	0.00408882	0.0038233	0.00410623	0.0062753	0.0036766	0.00354857	0.00344207	0.00367477	0.00314495	0.00345245
Bortala Mongolian Autonomous Prefecture	2004	0.00346864	0.00349015	0.00350252	0.00401697	0.00301513	0.00431001	0.00405148	0.00390547	0.00405609	0.00704113	0.00367455	0.00355771	0.00355017	0.00362963	0.00317414	0.00347661
Bortala Mongolian Autonomous Prefecture	2005	0.00347067	0.00340711	0.00351128	0.0040143	0.00343498	0.00387098	0.00407851	0.00394656	0.00408841	0.00600177	0.00368561	0.00355703	0.0035037	0.00370533	0.00318788	0.00345351
Bortala Mongolian Autonomous Prefecture	2006	0.00347042	0.00345609	0.0035308	0.00403419	0.00346528	0.00390538	0.00412604	0.00382261	0.0041505	0.00548006	0.00367455	0.00356735	0.00361129	0.00370597	0.00321493	0.00345458
Bortala Mongolian Autonomous Prefecture	2007	0.0034748	0.00350972	0.00362565	0.00400964	0.00338737	0.00392991	0.00410942	0.00355074	0.00412847	0.00516401	0.00367455	0.00355669	0.00355522	0.00368645	0.00326165	0.0034648
Bortala Mongolian Autonomous Prefecture	2008	0.00349472	0.0033436	0.00350684	0.00398827	0.00351289	0.0038949	0.00408605	0.00374317	0.00409726	0.00520545	0.00403251	0.00356396	0.00360977	0.00368837	0.00328172	0.00349594
Bortala Mongolian Autonomous Prefecture	2009	0.00349581	0.0033485	0.00360472	0.00399965	0.00346961	0.00392531	0.00404542	0.00385343	0.00404761	0.0042424	0.00373952	0.00356136	0.00360826	0.0036683	0.00325581	0.00352828
Bortala Mongolian Autonomous Prefecture	2010	0.00349631	0.00334473	0.00360689	0.00404314	0.00314498	0.0040104	0.00403353	0.00375892	0.00403115	0.00382623	0.00367455	0.00370357	0.00375247	0.00359314	0.00334232	0.00349854
Bortala Mongolian Autonomous Prefecture	2011	0.0034895	0.00333073	0.00361756	0.00404223	0.0032705	0.00396243	0.00406012	0.00374797	0.004065	0.00418933	0.00367455	0.0037344	0.00384037	0.00352966	0.00360234	0.00352902
Bortala Mongolian Autonomous Prefecture	2012	0.00349268	0.00333388	0.00357555	0.00403664	0.00343931	0.00394279	0.00407892	0.00340762	0.00408291	0.00433441	0.00367455	0.00371694	0.00391033	0.00355797	0.00362255	0.00356748
Bortala Mongolian Autonomous Prefecture	2013	0.0034748	0.00339784	0.00357839	0.00405022	0.00359946	0.00394432	0.00404479	0.00357471	0.00404018	0.00425247	0.00367455	0.00368851	0.00396665	0.00349464	0.00361121	0.00362592
Bortala Mongolian Autonomous Prefecture	2014	0.00346854	0.00340712	0.00358671	0.00405111	0.00373364	0.00324276	0.00406204	0.00354047	0.00406234	0.00402675	0.00367673	0.00368374	0.00403787	0.00343904	0.00360765	0.00367808
Bortala Mongolian Autonomous Prefecture	2015	0.00347326	0.00339816	0.0035947	0.0040117	0.00381588	0.00317011	0.00411727	0.00392328	0.00413661	0.00397918	0.00367455	0.00372805	0.00404419	0.00345338	0.00364102	0.00375009
Bortala Mongolian Autonomous Prefecture	2016	0.00348116	0.00340165	0.00357019	0.00312671	0.00381155	0.00302508	0.00410976	0.00376851	0.00412389	0.00377085	0.00372169	0.0037756	0.00376078	0.00349462	0.00344944	0.0038473
Bortala Mongolian Autonomous Prefecture	2017	0.00348101	0.00333505	0.0035701	0.00399792	0.00397603	0.00300695	0.0041026	0.0039808	0.00411496	0.0038205	0.00367455	0.00381521	0.00393782	0.00347112	0.00449076	0.00391912
Bortala Mongolian Autonomous Prefecture	2018	0.00348856	0.00334995	0.00356938	0.0040034	0.00391543	0.00300759	0.00411752	0.00389976	0.00413346	0.0037866	0.00367455	0.00357724	0.00383172	0.00350695	0.00461136	0.0039817
Bayangol Mongolian Autonomous Prefecture	2000	0.00350992	0.00332853	0.00349254	0.0038628	0.00401411	0.00340847	0.00392413	0.0037192	0.00396632	0.00355492	0.00367455	0.00358655	0.00368024	0.00361299	0.00306335	0.00359383
Bayangol Mongolian Autonomous Prefecture	2001	0.00350163	0.00332578	0.00348428	0.00392556	0.00400416	0.0034663	0.0037265	0.00375481	0.00380751	0.00354762	0.00370619	0.00355835	0.00366509	0.00365423	0.00319592	0.00361406
Bayangol Mongolian Autonomous Prefecture	2002	0.0035288	0.00339653	0.00349598	0.00391372	0.00400156	0.00353592	0.00385047	0.00385754	0.00391084	0.00354483	0.00373838	0.0035588	0.00354133	0.00374426	0.0032957	0.0036357
Bayangol Mongolian Autonomous Prefecture	2003	0.00352403	0.00374382	0.00354752	0.00392894	0.00400611	0.00352155	0.00376696	0.00393971	0.00375325	0.00353521	0.003794	0.00355733	0.00360523	0.00372153	0.00335722	0.00356117
Bayangol Mongolian Autonomous Prefecture	2004	0.00354232	0.00333864	0.00349845	0.00390335	0.00401065	0.00351633	0.0037774	0.00412461	0.00383294	0.00353479	0.00371068	0.00357277	0.00361104	0.00372575	0.00341402	0.00365522
Bayangol Mongolian Autonomous Prefecture	2005	0.00353948	0.00332606	0.00349873	0.00393302	0.00411453	0.00347205	0.00385921	0.004152	0.0039135	0.00352706	0.00367832	0.00356735	0.00365473	0.0038266	0.00345721	0.00351192
Bayangol Mongolian Autonomous Prefecture	2006	0.00351728	0.00334751	0.0035058	0.00393874	0.00417946	0.00340748	0.00383978	0.00402942	0.00388889	0.0035377	0.00372436	0.00356187	0.00368782	0.00376844	0.00352323	0.00346696
Bayangol Mongolian Autonomous Prefecture	2007	0.00352786	0.00332967	0.00351305	0.00396981	0.00413617	0.00346922	0.00387218	0.00406144	0.00391679	0.00355895	0.00367543	0.00356487	0.00381435	0.00381623	0.00360554	0.0034854
Bayangol Mongolian Autonomous Prefecture	2008	0.00356512	0.00437261	0.00375133	0.00397197	0.00424005	0.00343444	0.00383806	0.00407796	0.00389909	0.00357303	0.00367455	0.00355881	0.00383228	0.00382	0.00363006	0.00348425
Bayangol Mongolian Autonomous Prefecture	2009	0.00361953	0.00422484	0.00366458	0.00402691	0.00407991	0.00290514	0.00380312	0.00409448	0.00384453	0.00353557	0.00367455	0.00355962	0.00390048	0.00380992	0.00341005	0.00354479
Bayangol Mongolian Autonomous Prefecture	2010	0.00369678	0.00442713	0.00375588	0.00402159	0.00404095	0.00364027	0.00376439	0.00391301	0.00380789	0.00353281	0.00375209	0.00356803	0.00402449	0.0038904	0.00343949	0.00355088
Bayangol Mongolian Autonomous Prefecture	2011	0.00370011	0.00441964	0.00379373	0.00404262	0.00406692	0.00345259	0.00376364	0.00386849	0.00380068	0.00353334	0.00375745	0.00357418	0.00397473	0.00377578	0.00376156	0.00355503
Bayangol Mongolian Autonomous Prefecture	2012	0.00370955	0.00401081	0.00384768	0.00403645	0.00403229	0.00360407	0.00376563	0.00389075	0.00379057	0.00353168	0.00375718	0.00359615	0.00399014	0.00377785	0.00382362	0.00359644
Bayangol Mongolian Autonomous Prefecture	2013	0.00376167	0.00411444	0.00374577	0.0040359	0.00401931	0.0036798	0.00370733	0.00379933	0.00369931	0.00353166	0.00375457	0.00358544	0.0040654	0.00382943	0.00387992	0.00359768
Bayangol Mongolian Autonomous Prefecture	2014	0.00375059	0.00380393	0.00376581	0.00403772	0.00405826	0.0036894	0.00378947	0.00385137	0.0037939	0.00353213	0.00374167	0.00357259	0.00413183	0.00381401	0.00391859	0.00360801
Bayangol Mongolian Autonomous Prefecture	2015	0.00372009	0.00385556	0.00378645	0.00401625	0.00401498	0.00354948	0.00386227	0.00382535	0.00388021	0.00354192	0.00374273	0.00357915	0.00415633	0.00378232	0.00393803	0.00371582
Bayangol Mongolian Autonomous Prefecture	2016	0.0036858	0.00395194	0.00373208	0.00341931	0.0038202	0.00374531	0.00388384	0.00383836	0.0038845	0.00354848	0.00367455	0.00359056	0.00410663	0.00394696	0.00394744	0.00385515
Bayangol Mongolian Autonomous Prefecture	2017	0.00376768	0.00406759	0.00366465	0.0040113	0.00398035	0.00379874	0.00385298	0.00383186	0.0038244	0.00354568	0.00375259	0.00360234	0.00426525	0.004095	0.00491733	0.00390611
Bayangol Mongolian Autonomous Prefecture	2018	0.00379168	0.00395239	0.00367731	0.00400909	0.00411886	0.00372684	0.00384604	0.00383511	0.00382353	0.00353456	0.00367455	0.00355286	0.00442757	0.00417866	0.00511944	0.0039583
Aksu Administrative Offices	2000	0.00353024	0.003375	0.00349459	0.0035847	0.00277664	0.003825	0.00407011	0.00393013	0.00410389	0.00352145	0.00371134	0.00355146	0.00324835	0.00347429	0.00304054	0.00336374
Aksu Administrative Offices	2001	0.00355871	0.00335218	0.00348281	0.00374339	0.00293289	0.00383529	0.00403114	0.00400135	0.00407649	0.00352767	0.00367455	0.00358687	0.00326603	0.00357496	0.00335632	0.00337337
Aksu Administrative Offices	2002	0.00353357	0.00336028	0.00349317	0.00361445	0.00298397	0.00388203	0.00394593	0.00396026	0.0040015	0.00352057	0.00367808	0.00357726	0.0032534	0.00355929	0.00304356	0.00338363
Aksu Administrative Offices	2003	0.00354281	0.00336912	0.00349733	0.00378891	0.00306015	0.00382896	0.00395032	0.00402189	0.00400156	0.00352114	0.00402241	0.0035598	0.00325543	0.00361089	0.00307784	0.00339036
Aksu Administrative Offices	2004	0.00357133	0.00334707	0.00349921	0.00385513	0.00313632	0.00391219	0.00391663	0.00407668	0.00395993	0.00352296	0.00381792	0.00363143	0.0032476	0.0036843	0.00310747	0.00343278
Aksu Administrative Offices	2005	0.00353471	0.00333792	0.0035198	0.00383658	0.00305841	0.00396147	0.003665	0.00411092	0.0037278	0.00353021	0.00367455	0.00359969	0.00324153	0.00370439	0.00311331	0.00346121
Aksu Administrative Offices	2006	0.0035453	0.0034164	0.00354957	0.00385573	0.00310603	0.00394576	0.00358897	0.00414995	0.00365352	0.00352866	0.00368652	0.00356019	0.00330518	0.00370439	0.00310972	0.00345573
Aksu Administrative Offices	2007	0.00349358	0.00354199	0.0035093	0.00376293	0.00318394	0.00391722	0.003545	0.00409037	0.00360311	0.00352886	0.00367455	0.00355256	0.00346935	0.00372919	0.00311426	0.00347401
Aksu Administrative Offices	2008	0.00353332	0.00339327	0.00352499	0.00369053	0.00328782	0.00408428	0.00364474	0.00426979	0.00369694	0.00354116	0.00369844	0.00355432	0.00345445	0.00369237	0.0031229	0.00351041
Aksu Administrative Offices	2009	0.00364218	0.00374165	0.00356582	0.00375041	0.00329215	0.0039444	0.00360888	0.00429308	0.00365005	0.00354938	0.00367455	0.00355308	0.0035537	0.00362194	0.00354178	0.00353541
Aksu Administrative Offices	2010	0.00368441	0.00363325	0.00354161	0.00381714	0.00326618	0.00388754	0.00357847	0.00424856	0.0036225	0.00356397	0.00367455	0.00358357	0.00364993	0.00356149	0.00353699	0.00350011
Aksu Administrative Offices	2011	0.00363244	0.00361909	0.00353622	0.00374219	0.0033917	0.00388397	0.00345502	0.00417734	0.00350941	0.00356037	0.00370563	0.00357083	0.00371459	0.00351754	0.00360448	0.00352866
Aksu Administrative Offices	2012	0.00365038	0.0034761	0.00354534	0.00375621	0.00341767	0.00392366	0.00347231	0.00420405	0.00351162	0.00357591	0.00379979	0.00357057	0.00375702	0.00350377	0.00361003	0.00356273
Aksu Administrative Offices	2013	0.00373514	0.0035126	0.00354704	0.00378883	0.00339603	0.00399824	0.00345163	0.00366921	0.00346253	0.00357125	0.00380112	0.00356461	0.00384567	0.00352215	0.00360192	0.00362353
Aksu Administrative Offices	2014	0.0036231	0.00374399	0.00355467	0.00380278	0.00349991	0.00395447	0.00344448	0.00380755	0.00342487	0.00356534	0.00378741	0.00355554	0.00383784	0.00343773	0.00358065	0.00366388
Aksu Administrative Offices	2015	0.00362777	0.00365754	0.00356171	0.00382469	0.00350856	0.00398359	0.00363428	0.00373838	0.00366227	0.00354139	0.00369283	0.00355517	0.00387244	0.00346515	0.00319715	0.00368091
Aksu Administrative Offices	2016	0.00364501	0.00360947	0.0035486	0.00336724	0.00349991	0.00396502	0.003732	0.00386815	0.00377599	0.00353301	0.00374505	0.00355662	0.00377794	0.00349032	0.00329564	0.00376833
Aksu Administrative Offices	2017	0.00376421	0.00342885	0.0035186	0.00378107	0.00370767	0.00387935	0.00372001	0.00399792	0.0037564	0.00354285	0.00367455	0.0035567	0.00390193	0.00360534	0.0049571	0.00380271
Aksu Administrative Offices	2018	0.00390193	0.00344121	0.00352795	0.00378024	0.0036817	0.00385081	0.00372799	0.00393304	0.0037654	0.00353839	0.00367455	0.00355584	0.00391375	0.00372717	0.0051781	0.00380689
Kizilsu Kirgiz Autonomous Prefecture	2000	0.00348011	0.00331349	0.00346156	0.00318584	0.00300041	0.00413424	0.0040655	0.00285703	0.00408509	0.00380933	0.00367455	0.00355035	0.00334433	0.0034621	0.00308469	0.00331392
Kizilsu Kirgiz Autonomous Prefecture	2001	0.00348235	0.00331349	0.00346156	0.00376439	0.00332634	0.00415174	0.00418905	0.00268651	0.00422843	0.00367005	0.00367455	0.00416195	0.00331402	0.00360432	0.00309732	0.00331613
Kizilsu Kirgiz Autonomous Prefecture	2002	0.0034901	0.00331349	0.00346156	0.00285748	0.00336876	0.00412093	0.00418033	0.00298098	0.0042168	0.00360813	0.00367455	0.00409291	0.00324583	0.00367878	0.00324557	0.0033203
Kizilsu Kirgiz Autonomous Prefecture	2003	0.00349378	0.00331349	0.00346156	0.00339606	0.00341918	0.00416808	0.00418838	0.00299468	0.00422759	0.00366358	0.00367455	0.00364257	0.00328422	0.00377644	0.00318121	0.00332489
Kizilsu Kirgiz Autonomous Prefecture	2004	0.00349442	0.00331349	0.00346156	0.00339879	0.00346961	0.00420338	0.00415416	0.00304261	0.00418272	0.00383801	0.00367936	0.00357201	0.00324911	0.003811	0.00322196	0.00334327
Kizilsu Kirgiz Autonomous Prefecture	2005	0.00347952	0.00331349	0.00346156	0.00340434	0.00346528	0.00421063	0.00423432	0.00320697	0.00428326	0.00390121	0.00367455	0.00366307	0.00325239	0.00382392	0.003242	0.0033299
Kizilsu Kirgiz Autonomous Prefecture	2006	0.00347639	0.00331349	0.00346156	0.0033523	0.00359513	0.00422824	0.00423062	0.00327956	0.00427882	0.00398356	0.00367455	0.00383458	0.00333397	0.00387302	0.0032282	0.00333838
Kizilsu Kirgiz Autonomous Prefecture	2007	0.00347604	0.00332191	0.00346156	0.00329329	0.00367737	0.00401764	0.00422819	0.00320697	0.0042736	0.00450494	0.00377185	0.00378226	0.00351153	0.00374761	0.0032365	0.00334498
Kizilsu Kirgiz Autonomous Prefecture	2008	0.00347336	0.00332576	0.00346636	0.00326279	0.00374229	0.004187	0.00422215	0.00334872	0.00426165	0.00437507	0.00734911	0.00400897	0.00358123	0.00351391	0.00324891	0.003356
Kizilsu Kirgiz Autonomous Prefecture	2009	0.00346963	0.00379704	0.00353279	0.00320353	0.00378558	0.00408274	0.00421179	0.00343158	0.00425642	0.00382717	0.00387571	0.00392307	0.00372696	0.00351795	0.00377355	0.00336277
Kizilsu Kirgiz Autonomous Prefecture	2010	0.00347569	0.00363411	0.00351757	0.00308464	0.00390244	0.00402925	0.00410869	0.00313095	0.00414124	0.00369449	0.00430855	0.00515848	0.00382269	0.00348695	0.0037654	0.00337557
Kizilsu Kirgiz Autonomous Prefecture	2011	0.00347152	0.00364645	0.00353033	0.00313643	0.00395871	0.00400378	0.00405999	0.00315903	0.00409259	0.00372381	0.00404403	0.00408019	0.00390123	0.00339605	0.00384129	0.00338236
Kizilsu Kirgiz Autonomous Prefecture	2012	0.00348121	0.00353679	0.00351978	0.00297841	0.00403229	0.00400312	0.00404424	0.00313095	0.00404381	0.00378268	0.00367928	0.00399959	0.00391538	0.00342706	0.0039006	0.00339677
Kizilsu Kirgiz Autonomous Prefecture	2013	0.00349025	0.00350237	0.00350107	0.00315056	0.00408423	0.00387623	0.00399944	0.00358704	0.00398935	0.00385475	0.00367455	0.00401743	0.00383405	0.00347146	0.0039001	0.0034107
Kizilsu Kirgiz Autonomous Prefecture	2014	0.00350123	0.00343619	0.00348804	0.00329171	0.00413617	0.00383076	0.00407747	0.00349253	0.00409211	0.00388387	0.00393688	0.0038279	0.00385097	0.00351134	0.00386632	0.00343336
Kizilsu Kirgiz Autonomous Prefecture	2015	0.00349686	0.00343368	0.00347608	0.00325133	0.00415782	0.00385394	0.00412521	0.00356889	0.00411866	0.00369115	0.00382204	0.00380627	0.0039669	0.00345116	0.00383591	0.00345822
Kizilsu Kirgiz Autonomous Prefecture	2016	0.00348265	0.00344401	0.0034828	0.00392556	0.00412319	0.00387253	0.00410328	0.00364525	0.00406188	0.00371677	0.00371416	0.00384492	0.00415282	0.00345836	0.00330694	0.00349501
Kizilsu Kirgiz Autonomous Prefecture	2017	0.00350331	0.00340662	0.00347497	0.00327749	0.0042617	0.0036016	0.00409747	0.00370206	0.00408096	0.0037406	0.0036781	0.0038059	0.00404949	0.00352329	0.00524605	0.00349026
Kizilsu Kirgiz Autonomous Prefecture	2018	0.00348911	0.0034046	0.00347785	0.00347071	0.00424871	0.00357177	0.00415298	0.00377444	0.00416077	0.00360124	0.00367797	0.00359006	0.00408614	0.00354796	0.00554079	0.00350042
Kashgar Administrative Offices	2000	0.00358564	0.00331394	0.00346156	0.00334029	0.00242431	0.00395188	0.00417279	0.00287689	0.00421801	0.0035888	0.0036814	0.00447925	0.00306651	0.00341347	0.00360624	0.00330976
Kashgar Administrative Offices	2001	0.0035847	0.0033147	0.00346229	0.00311539	0.00250395	0.00398796	0.00419141	0.00350828	0.00423456	0.00354104	0.00369329	0.00407333	0.00307156	0.00350572	0.0029991	0.00331322
Kashgar Administrative Offices	2002	0.00368829	0.00331457	0.00346218	0.00308002	0.00256671	0.00394234	0.00417225	0.00344665	0.00421303	0.00353323	0.00368014	0.00390007	0.00306651	0.00360369	0.00299082	0.00331667
Kashgar Administrative Offices	2003	0.00374145	0.00332036	0.00346997	0.00317068	0.00271301	0.00393906	0.00417154	0.00370688	0.0042095	0.00354548	0.00370073	0.00380747	0.00306373	0.00368917	0.00303618	0.00333043
Kashgar Administrative Offices	2004	0.00370598	0.00332777	0.00346936	0.00318684	0.00285931	0.00390254	0.00416749	0.00315698	0.00420173	0.00356441	0.00371167	0.00427542	0.00308595	0.0037292	0.0030464	0.00334343
Kashgar Administrative Offices	2005	0.0036467	0.00332415	0.00347022	0.00321307	0.00288744	0.00387652	0.00415047	0.00316519	0.00418045	0.00358475	0.00367656	0.00373228	0.00309429	0.00370391	0.00304429	0.00336031
Kashgar Administrative Offices	2006	0.00366325	0.00332307	0.0034651	0.00321615	0.00291558	0.00388148	0.00415797	0.00316519	0.00419018	0.00375019	0.00368585	0.00383463	0.00310666	0.00381843	0.00305192	0.00338092
Kashgar Administrative Offices	2007	0.00367	0.00346412	0.00348333	0.00337674	0.00294371	0.00390085	0.0041513	0.00316519	0.00418184	0.00396993	0.00371674	0.00383175	0.00324254	0.00388455	0.00305564	0.00340954
Kashgar Administrative Offices	2008	0.00369107	0.00341235	0.00350327	0.00331413	0.00297185	0.00390704	0.00415423	0.00333503	0.00418495	0.00405966	0.00367455	0.00372892	0.00327159	0.00378588	0.00310308	0.00342906
Kashgar Administrative Offices	2009	0.00392871	0.00375917	0.00347826	0.00338844	0.00301513	0.00388473	0.00415372	0.00363155	0.00418568	0.00372521	0.00367455	0.00369923	0.0033711	0.00376699	0.00312426	0.00346589
Kashgar Administrative Offices	2010	0.00394019	0.00365256	0.00349851	0.0033244	0.00294588	0.00400995	0.0041712	0.00362402	0.00420745	0.00368403	0.00368901	0.00386661	0.0035143	0.00370794	0.00355562	0.0034442
Kashgar Administrative Offices	2011	0.00381101	0.00367629	0.00349976	0.00351118	0.00321856	0.00394784	0.00416289	0.00345144	0.00419776	0.00367108	0.00367455	0.0038449	0.00359614	0.00358513	0.00370537	0.00349524
Kashgar Administrative Offices	2012	0.0039542	0.00355971	0.00348548	0.0035724	0.00330513	0.00393	0.00416646	0.00354389	0.0042008	0.00364894	0.00370904	0.00375788	0.00359689	0.00364004	0.00378491	0.00353225
Kashgar Administrative Offices	2013	0.00399524	0.00352754	0.00348916	0.00368065	0.00343065	0.00393487	0.00417075	0.00336755	0.00420432	0.00371659	0.0036864	0.00365863	0.00363579	0.00367107	0.00378598	0.00359385
Kashgar Administrative Offices	2014	0.00397328	0.00350726	0.00348784	0.00370728	0.00347394	0.00391169	0.00419209	0.00319122	0.00423016	0.00368699	0.00368616	0.00357989	0.00363377	0.00363814	0.0037704	0.0035932
Kashgar Administrative Offices	2015	0.00392801	0.00349059	0.00348663	0.00367938	0.00351289	0.0039797	0.00417796	0.00320286	0.00421464	0.00364268	0.003708	0.00358124	0.00377874	0.00361035	0.0037957	0.0036205
Kashgar Administrative Offices	2016	0.00392826	0.00350158	0.00348589	0.00411843	0.00329215	0.00409756	0.00418729	0.00330216	0.00422776	0.0037638	0.00367455	0.00358876	0.00389123	0.00366098	0.0037792	0.00369205
Kashgar Administrative Offices	2017	0.00429478	0.00347258	0.00348688	0.00363245	0.00340901	0.00406688	0.00418785	0.00325251	0.0042288	0.00376573	0.00367509	0.0036112	0.00394211	0.0038396	0.00555598	0.00369672
Kashgar Administrative Offices	2018	0.00426	0.0034712	0.00348554	0.00363768	0.00340468	0.00406588	0.00419165	0.00327733	0.00423261	0.00363884	0.00368027	0.00355368	0.00394498	0.00392295	0.00559955	0.00372977
Hotan Administrative Offices	2000	0.00353422	0.00333189	0.00346365	0.00264078	0.00237973	0.00404095	0.00410783	0.0034398	0.00414088	0.00362513	0.00367455	0.00359632	0.00311449	0.00334616	0.00282765	0.00328143
Hotan Administrative Offices	2001	0.00353044	0.00333379	0.00346677	0.00215349	0.00246889	0.00414578	0.00415156	0.0034398	0.00418666	0.00362676	0.00367455	0.00363902	0.00311702	0.00340494	0.00308515	0.0032801
Hotan Administrative Offices	2002	0.00354296	0.00332536	0.00346192	0.00207048	0.0025507	0.00415998	0.00416137	0.0032686	0.00419357	0.00356473	0.00367455	0.00361659	0.00313722	0.00343015	0.00283752	0.00328022
Hotan Administrative Offices	2003	0.00357461	0.00335127	0.00346924	0.00246298	0.00266605	0.00407716	0.00417386	0.0028988	0.00420996	0.00352126	0.00367455	0.0035671	0.00317107	0.00339265	0.00297044	0.00327991
Hotan Administrative Offices	2004	0.00363085	0.00332278	0.00346193	0.00253547	0.0027814	0.00402497	0.00416813	0.00295907	0.00420326	0.00353812	0.00367455	0.00375847	0.00314329	0.00347972	0.00297454	0.00332227
Hotan Administrative Offices	2005	0.00355295	0.00336548	0.00346328	0.00266846	0.00281603	0.00394381	0.0041774	0.00297961	0.00421433	0.00352731	0.00367455	0.00406633	0.00317966	0.00344538	0.00299091	0.00330262
Hotan Administrative Offices	2006	0.00354902	0.00338386	0.00346838	0.00272211	0.00302812	0.00390257	0.00417527	0.00308918	0.00421085	0.00352435	0.00367455	0.00369253	0.0032481	0.00342531	0.00299882	0.00331589
Hotan Administrative Offices	2007	0.00353755	0.00662698	0.00354443	0.00275703	0.00303677	0.00388762	0.00415676	0.00300289	0.00418869	0.00352695	0.00367455	0.00369577	0.00318395	0.00346361	0.00300046	0.00332477
Hotan Administrative Offices	2008	0.00356875	0.00337888	0.0034721	0.00288704	0.00308871	0.00384623	0.00416648	0.00302207	0.00419866	0.00356789	0.00367455	0.00370654	0.00335039	0.00351615	0.00301447	0.00333151
Hotan Administrative Offices	2009	0.00359588	0.0034287	0.00348386	0.00296407	0.00321856	0.00385544	0.00416311	0.00302549	0.00418828	0.00352091	0.00367455	0.00367669	0.00361634	0.00350255	0.00332256	0.00333421
Hotan Administrative Offices	2010	0.00366538	0.00341681	0.00348111	0.00308433	0.00325319	0.00385701	0.00417233	0.00294058	0.00419947	0.00352494	0.00367455	0.0037559	0.00375374	0.00344018	0.00335509	0.00333636
Hotan Administrative Offices	2011	0.0036469	0.00340153	0.00347811	0.00325551	0.00338304	0.00394202	0.00418751	0.00290702	0.00421684	0.00352256	0.00368407	0.00382858	0.00379364	0.0033737	0.00378827	0.00333845
Hotan Administrative Offices	2012	0.00393581	0.00339272	0.00347567	0.00328713	0.00343065	0.00391167	0.00419509	0.0028358	0.00422237	0.00352343	0.00367455	0.00376063	0.00387118	0.00348263	0.00379409	0.00334472
Hotan Administrative Offices	2013	0.00398098	0.00338141	0.00347104	0.00338737	0.00343498	0.0039309	0.0041727	0.00277417	0.00419363	0.00352483	0.00367455	0.00361162	0.00393281	0.00348773	0.00379154	0.00334933
Hotan Administrative Offices	2014	0.00381304	0.00336425	0.00346926	0.0034091	0.00349558	0.00376479	0.0041849	0.00277417	0.00421051	0.00352359	0.00367455	0.00356799	0.00391967	0.00334821	0.00374511	0.0033551
Hotan Administrative Offices	2015	0.00388966	0.00335802	0.00346757	0.00344792	0.00361244	0.00375982	0.00418562	0.00264268	0.00418288	0.00352292	0.00392104	0.00356708	0.00396438	0.00332737	0.00369658	0.00335758
Hotan Administrative Offices	2016	0.00385379	0.00335908	0.00347373	0.00383563	0.00358647	0.00374377	0.00416936	0.00228727	0.00420207	0.0035255	0.00369406	0.00357151	0.00465671	0.00329972	0.00306663	0.00336871
Hotan Administrative Offices	2017	0.00400482	0.00333687	0.00346429	0.00344536	0.00380722	0.00371708	0.00418116	0.00257009	0.00421577	0.00352282	0.00367455	0.00357478	0.00416527	0.00339134	0.00503823	0.00337441
Hotan Administrative Offices	2018	0.0040398	0.00333716	0.00346698	0.00345331	0.00379856	0.00367905	0.00417131	0.00242868	0.00420361	0.00352742	0.00367455	0.00355257	0.00420356	0.00345205	0.00520736	0.00337279
Rij*LNRij
Urumqi City	2000	-0.0233415	-0.0224422	-0.0224135	-0.0217604	-0.0252408	-0.0223044	-0.0187283	-0.0165432	-0.0187247	-0.0207617	-0.0213784	-0.0250164	-0.0216323	-0.0213944	-0.0189949	-0.0228507
Urumqi City	2001	-0.0249113	-0.021588	-0.0216614	-0.0215171	-0.0252691	-0.0207323	-0.0185733	-0.0181555	-0.01855	-0.0204009	-0.0213586	-0.0249058	-0.023123	-0.0243002	-0.0190742	-0.0228812
Urumqi City	2002	-0.0248097	-0.0223526	-0.0231645	-0.0215702	-0.0252389	-0.021421	-0.0187653	-0.0188045	-0.0186861	-0.0204259	-0.021295	-0.0246991	-0.0225118	-0.0244409	-0.0212223	-0.0231945
Urumqi City	2003	-0.0262137	-0.022273	-0.0228783	-0.0216605	-0.0252323	-0.0214129	-0.0188551	-0.0178288	-0.0188315	-0.0207271	-0.0208826	-0.0217989	-0.0247241	-0.0250594	-0.0217911	-0.0230346
Urumqi City	2004	-0.0262429	-0.0225527	-0.0226799	-0.0217127	-0.0252257	-0.0214865	-0.0189427	-0.0182858	-0.0189165	-0.0211544	-0.0212947	-0.0220835	-0.0259565	-0.0252382	-0.0222192	-0.0237295
Urumqi City	2005	-0.026603	-0.0221265	-0.0228025	-0.0211269	-0.0252257	-0.0212976	-0.0189888	-0.0183183	-0.0189149	-0.0214478	-0.0213024	-0.0222906	-0.0238909	-0.0254372	-0.0225069	-0.0242221
Urumqi City	2006	-0.0278632	-0.0217472	-0.0220759	-0.0215938	-0.0252634	-0.0211629	-0.019127	-0.0169423	-0.0189977	-0.0211932	-0.0224147	-0.0226709	-0.0257083	-0.0258814	-0.0217129	-0.0247271
Urumqi City	2007	-0.0282515	-0.0216503	-0.0222428	-0.021953	-0.0251313	-0.020811	-0.0193908	-0.018341	-0.0192589	-0.021454	-0.0225194	-0.0224599	-0.0259817	-0.0259393	-0.0221173	-0.0246924
Urumqi City	2008	-0.0297859	-0.0242874	-0.022649	-0.0219422	-0.0251691	-0.0203419	-0.0194669	-0.0179335	-0.0192154	-0.0214806	-0.0208677	-0.0215369	-0.0254671	-0.0267726	-0.0227075	-0.0252603
Urumqi City	2009	-0.0331162	-0.0246514	-0.0237085	-0.0220253	-0.0252257	-0.022425	-0.0197806	-0.0211421	-0.0193516	-0.0209266	-0.022269	-0.0214196	-0.026439	-0.0287997	-0.022336	-0.0264038
Urumqi City	2010	-0.0344762	-0.0244655	-0.0236918	-0.0220791	-0.0252257	-0.0221105	-0.0198235	-0.0213142	-0.0193445	-0.0212445	-0.021087	-0.0224775	-0.0242979	-0.0292179	-0.0229078	-0.0260529
Urumqi City	2011	-0.0331338	-0.0241463	-0.0240286	-0.0221154	-0.0252634	-0.0203208	-0.0198042	-0.0217506	-0.0193411	-0.0214326	-0.0214523	-0.0214962	-0.0271672	-0.0282619	-0.023811	-0.026894
Urumqi City	2012	-0.0329434	-0.0251702	-0.0249978	-0.0222223	-0.0252634	-0.0199166	-0.0202417	-0.021999	-0.0198075	-0.0213562	-0.0216546	-0.0215838	-0.0267849	-0.0277093	-0.0239977	-0.0275047
Urumqi City	2013	-0.0332029	-0.0262939	-0.0249197	-0.022191	-0.0252823	-0.0199234	-0.020684	-0.0222775	-0.0203276	-0.0208729	-0.021553	-0.0214967	-0.0267621	-0.0274547	-0.0242179	-0.0286139
Urumqi City	2014	-0.033263	-0.0267444	-0.0244033	-0.0219342	-0.0253011	-0.0198455	-0.0207488	-0.0224626	-0.0204959	-0.0208167	-0.0214706	-0.0208956	-0.0273136	-0.0275444	-0.0243105	-0.0293399
Urumqi City	2015	-0.0322618	-0.0268104	-0.0242537	-0.0218037	-0.0252823	-0.0201505	-0.0211611	-0.0230156	-0.0210431	-0.0205101	-0.0216841	-0.0210724	-0.027534	-0.0269347	-0.0244883	-0.0299302
Urumqi City	2016	-0.0318499	-0.0279215	-0.0244095	-0.0218267	-0.0253011	-0.0197439	-0.0214635	-0.0231991	-0.0213702	-0.0204838	-0.0207325	-0.022573	-0.02753	-0.0265432	-0.0242695	-0.0323999
Urumqi City	2017	-0.0318811	-0.026398	-0.0236957	-0.0218502	-0.0253388	-0.0196207	-0.0213205	-0.0234736	-0.0211744	-0.0206452	-0.0206376	-0.0226585	-0.0305634	-0.0289359	-0.0277164	-0.0329748
Urumqi City	2018	-0.0318606	-0.0267752	-0.0238815	-0.0218995	-0.0253576	-0.01984	-0.0213886	-0.0235041	-0.0212287	-0.0206329	-0.0206063	-0.021068	-0.0312192	-0.0289903	-0.0286992	-0.0324985
Karamay City	2000	-0.0199209	-0.0297492	-0.0269965	-0.0209434	-0.0254386	-0.0205116	-0.0136749	-0.0183475	-0.014716	-0.0200123	-0.0206007	-0.0200387	-0.0212525	-0.0213085	-0.0260681	-0.0211397
Karamay City	2001	-0.0197323	-0.0275479	-0.0271373	-0.0201393	-0.0254518	-0.0166265	-0.013738	-0.022801	-0.0148124	-0.020012	-0.0206007	-0.0200233	-0.0210445	-0.0201602	-0.0292671	-0.0206629
Karamay City	2002	-0.0197792	-0.0279944	-0.0269569	-0.0212639	-0.025448	-0.019555	-0.0140204	-0.020149	-0.0149892	-0.0199974	-0.0206007	-0.0200233	-0.0215864	-0.0201531	-0.0243048	-0.0208915
Karamay City	2003	-0.0197644	-0.024354	-0.0288898	-0.0215763	-0.0254499	-0.0198162	-0.0138079	-0.0210637	-0.0148491	-0.0200069	-0.0206447	-0.0200205	-0.0221372	-0.0208783	-0.0274906	-0.0203765
Karamay City	2004	-0.0197441	-0.0265589	-0.0320269	-0.021642	-0.0254518	-0.0178963	-0.0132978	-0.0218439	-0.0143684	-0.0199695	-0.0206007	-0.0200278	-0.0235595	-0.0211092	-0.0268465	-0.0201273
Karamay City	2005	-0.019769	-0.0275926	-0.0344279	-0.0219533	-0.025433	-0.0154272	-0.0131327	-0.0218439	-0.0142545	-0.0199624	-0.0206024	-0.0200352	-0.0234674	-0.0216085	-0.0263945	-0.0200188
Karamay City	2006	-0.0199204	-0.0263542	-0.032401	-0.0219297	-0.025433	-0.0150903	-0.0142482	-0.0228654	-0.0154614	-0.019941	-0.0206007	-0.0200266	-0.0236234	-0.0225377	-0.0260544	-0.0198161
Karamay City	2007	-0.0201443	-0.0266138	-0.032768	-0.0219729	-0.0254141	-0.0146799	-0.0149618	-0.0237867	-0.016085	-0.0199652	-0.0206016	-0.0200231	-0.0219315	-0.0238352	-0.0250162	-0.0199434
Karamay City	2008	-0.0201712	-0.0246701	-0.0298592	-0.0220444	-0.0254141	-0.0143124	-0.0151722	-0.0236136	-0.0163065	-0.0199457	-0.0206007	-0.0200224	-0.0230293	-0.0240143	-0.024986	-0.0196639
Karamay City	2009	-0.0201678	-0.0291967	-0.0342314	-0.0220357	-0.0253765	-0.0161987	-0.0143984	-0.0237685	-0.01556	-0.0200038	-0.0206007	-0.0200235	-0.0227806	-0.0239994	-0.0259901	-0.0205082
Karamay City	2010	-0.0200563	-0.0259705	-0.0332495	-0.0224555	-0.0254141	-0.0155328	-0.0136602	-0.0238079	-0.0147179	-0.0200078	-0.0206007	-0.0200266	-0.0204989	-0.0238015	-0.0263315	-0.0202746
Karamay City	2011	-0.019994	-0.0256598	-0.0331479	-0.0224483	-0.0253953	-0.0151924	-0.0134243	-0.023811	-0.0146145	-0.020058	-0.0208318	-0.0200252	-0.0226037	-0.0234403	-0.0266989	-0.0204089
Karamay City	2012	-0.0199474	-0.0299491	-0.0287142	-0.0224208	-0.0253953	-0.014591	-0.0136392	-0.023814	-0.0147887	-0.0199714	-0.0208567	-0.0200406	-0.0217539	-0.0230298	-0.0283274	-0.0207621
Karamay City	2013	-0.0199777	-0.0252383	-0.0283302	-0.022548	-0.0253953	-0.0143	-0.0134792	-0.023817	-0.0146794	-0.0201426	-0.0208424	-0.0200459	-0.0216702	-0.0231699	-0.0288959	-0.0211689
Karamay City	2014	-0.0199957	-0.0288497	-0.0280181	-0.0223662	-0.0253953	-0.0132697	-0.0130368	-0.0238504	-0.014283	-0.0200548	-0.0206007	-0.0200605	-0.0220378	-0.0230636	-0.0288655	-0.0214233
Karamay City	2015	-0.019962	-0.0291362	-0.0277183	-0.0223387	-0.0253576	-0.0155583	-0.0144362	-0.0239383	-0.0155134	-0.0199299	-0.0206007	-0.0201	-0.0219521	-0.0227654	-0.0288118	-0.0232145
Karamay City	2016	-0.0200102	-0.0262195	-0.026612	-0.0223805	-0.0253388	-0.0140598	-0.0141538	-0.0238625	-0.0151704	-0.019951	-0.0253176	-0.0201163	-0.0222729	-0.0231068	-0.0273531	-0.0239997
Karamay City	2017	-0.0200247	-0.025874	-0.0273431	-0.0223966	-0.0253765	-0.0143964	-0.0149299	-0.0238534	-0.0158621	-0.0199249	-0.0206007	-0.0201286	-0.0227458	-0.0231649	-0.0283477	-0.0231413
Karamay City	2018	-0.020248	-0.0245148	-0.0265941	-0.0224228	-0.0253953	-0.0144413	-0.015435	-0.0239262	-0.0162211	-0.0199317	-0.0206007	-0.0200998	-0.0230289	-0.0239099	-0.0292636	-0.0223491
Turpan City	2000	-0.0197061	-0.0193786	-0.0197967	-0.0203374	-0.0231294	-0.0191078	-0.0216482	-0.0201934	-0.021916	-0.0199594	-0.0206643	-0.0223805	-0.0186596	-0.0199918	-0.0176946	-0.0196253
Turpan City	2001	-0.019692	-0.0193859	-0.0198202	-0.0207285	-0.0234226	-0.0191347	-0.0221136	-0.0204656	-0.0223406	-0.0199141	-0.0206007	-0.0220017	-0.0187431	-0.0200807	-0.0176282	-0.0195972
Turpan City	2002	-0.0197899	-0.0194203	-0.0199285	-0.020633	-0.0234265	-0.0196016	-0.0223065	-0.0227396	-0.022492	-0.019897	-0.0208396	-0.0214483	-0.0190643	-0.020254	-0.0177977	-0.0202445
Turpan City	2003	-0.0198049	-0.0194001	-0.019866	-0.0209368	-0.0233918	-0.0193598	-0.0223822	-0.0238989	-0.0225514	-0.0199029	-0.0208106	-0.0205885	-0.0192564	-0.020124	-0.0178286	-0.0195884
Turpan City	2004	-0.0197235	-0.0190623	-0.0197455	-0.0217184	-0.0233571	-0.0191723	-0.0220281	-0.0238989	-0.022292	-0.0199081	-0.0206007	-0.0223806	-0.0190156	-0.020028	-0.0178336	-0.0200056
Turpan City	2005	-0.0197068	-0.0190165	-0.0197289	-0.021899	-0.0235304	-0.0188175	-0.0218193	-0.0239898	-0.0221126	-0.0198936	-0.0212605	-0.0211444	-0.0190643	-0.0198681	-0.0178389	-0.0200532
Turpan City	2006	-0.0196732	-0.019823	-0.0204412	-0.0218658	-0.0237418	-0.0189731	-0.0216895	-0.0173392	-0.0219543	-0.0198975	-0.0206007	-0.0215075	-0.0190073	-0.0196421	-0.0180876	-0.0201052
Turpan City	2007	-0.0196774	-0.020113	-0.0211445	-0.0218233	-0.0236842	-0.0192325	-0.0212909	-0.0197992	-0.0213646	-0.0198984	-0.0206329	-0.02274	-0.0188503	-0.0193016	-0.0179814	-0.0200674
Turpan City	2008	-0.0196612	-0.0206661	-0.0199933	-0.0217182	-0.0237418	-0.0193661	-0.0209586	-0.0197832	-0.0209569	-0.0198992	-0.0206998	-0.0208979	-0.0189514	-0.0191328	-0.0181212	-0.0201212
Turpan City	2009	-0.0198576	-0.0283161	-0.0203954	-0.0215779	-0.0230095	-0.0213995	-0.0208148	-0.0197912	-0.0207337	-0.0199087	-0.020649	-0.0211291	-0.0188753	-0.019175	-0.0198977	-0.0207658
Turpan City	2010	-0.0197894	-0.0262409	-0.0205296	-0.0212248	-0.0229514	-0.0215605	-0.0197947	-0.0183776	-0.0195273	-0.0199029	-0.0206007	-0.0235726	-0.0190311	-0.0189798	-0.0202704	-0.0208413
Turpan City	2011	-0.0198375	-0.0264642	-0.0205325	-0.0211448	-0.0231835	-0.0211306	-0.0190865	-0.0169357	-0.0186261	-0.0199276	-0.0206007	-0.0228848	-0.0192066	-0.0189091	-0.0213963	-0.0203749
Turpan City	2012	-0.0198657	-0.0291035	-0.0215211	-0.0212346	-0.0228545	-0.0213089	-0.0189533	-0.0157848	-0.0183642	-0.0199279	-0.0207496	-0.0222504	-0.0195212	-0.0190267	-0.022003	-0.0205587
Turpan City	2013	-0.0197913	-0.0288009	-0.0220127	-0.0212876	-0.0225826	-0.0213335	-0.0186688	-0.0209884	-0.0180188	-0.0199869	-0.0207574	-0.0208833	-0.0203088	-0.0187831	-0.0218765	-0.0207009
Turpan City	2014	-0.0198033	-0.0272125	-0.0217285	-0.0213512	-0.0224074	-0.0217233	-0.0192999	-0.0216916	-0.0185969	-0.0199273	-0.0206044	-0.0207617	-0.0207188	-0.0187005	-0.0217216	-0.0211734
Turpan City	2015	-0.0198421	-0.027622	-0.0213338	-0.0211868	-0.0212688	-0.0235141	-0.0200686	-0.0230186	-0.0194578	-0.019944	-0.0208963	-0.0209199	-0.0211093	-0.0186897	-0.0211067	-0.0224774
Turpan City	2016	-0.0198336	-0.0256725	-0.0212962	-0.0211777	-0.0211501	-0.0231696	-0.0194881	-0.0231746	-0.0186652	-0.0199164	-0.0206007	-0.0210738	-0.021505	-0.0189807	-0.0208791	-0.0226843
Turpan City	2017	-0.019766	-0.023098	-0.0211205	-0.0211996	-0.0221144	-0.0225691	-0.0184344	-0.0224595	-0.0171173	-0.0198979	-0.0206007	-0.0211259	-0.0222871	-0.0189636	-0.0269355	-0.0226899
Turpan City	2018	-0.0197982	-0.0213907	-0.0208866	-0.0212556	-0.0224463	-0.0222461	-0.0185529	-0.0228179	-0.0170434	-0.0199186	-0.0206044	-0.0210231	-0.0222913	-0.0191533	-0.0282951	-0.0226086
Hami City	2000	-0.0197716	-0.0190914	-0.01986	-0.0192472	-0.0217222	-0.0221303	-0.0212179	-0.0213861	-0.0210385	-0.0203717	-0.0208721	-0.0200593	-0.0205222	-0.0206361	-0.0186905	-0.0201154
Hami City	2001	-0.01972	-0.0193479	-0.0197195	-0.0215862	-0.0221223	-0.0223444	-0.0212669	-0.0215639	-0.0210231	-0.020448	-0.0206478	-0.0201079	-0.0204406	-0.0203313	-0.0190598	-0.0201802
Hami City	2002	-0.0197959	-0.019322	-0.0197404	-0.019394	-0.0223469	-0.0225736	-0.0211665	-0.0217506	-0.0209342	-0.0201917	-0.0206558	-0.0201341	-0.0206037	-0.0208673	-0.0187195	-0.0202545
Hami City	2003	-0.0198042	-0.0192811	-0.0197076	-0.0199426	-0.022221	-0.022646	-0.0210989	-0.021937	-0.020832	-0.0202692	-0.0206273	-0.0200213	-0.0202842	-0.020851	-0.0189183	-0.0202776
Hami City	2004	-0.0197771	-0.0191201	-0.0197169	-0.0202939	-0.0220949	-0.022693	-0.020742	-0.0224934	-0.0203371	-0.0200931	-0.0209269	-0.0202518	-0.0208685	-0.0215191	-0.0192878	-0.0205195
Hami City	2005	-0.0196941	-0.0190275	-0.0196567	-0.020568	-0.0224463	-0.0219369	-0.0207695	-0.0213454	-0.0204411	-0.0200323	-0.0208086	-0.0210748	-0.0203613	-0.0213773	-0.0197056	-0.0203939
Hami City	2006	-0.0196936	-0.01912	-0.0197327	-0.0207897	-0.0226021	-0.0216756	-0.0206256	-0.0213361	-0.0202453	-0.0201413	-0.0213131	-0.0212169	-0.0205059	-0.021408	-0.0204443	-0.0206023
Hami City	2007	-0.019682	-0.0191795	-0.0197986	-0.0209351	-0.0225437	-0.0216914	-0.0208436	-0.0222188	-0.0204976	-0.020111	-0.0207067	-0.0207774	-0.020778	-0.021301	-0.0204858	-0.0208803
Hami City	2008	-0.0196774	-0.019031	-0.0199284	-0.0215735	-0.0228545	-0.018734	-0.020938	-0.0229788	-0.0206424	-0.0200436	-0.0228764	-0.0206227	-0.0209832	-0.0210865	-0.0206489	-0.0208938
Hami City	2009	-0.0197535	-0.0200446	-0.0205256	-0.0215748	-0.0225437	-0.021626	-0.0204619	-0.0233456	-0.020116	-0.0200339	-0.02106	-0.0205722	-0.0209195	-0.0210486	-0.0194658	-0.0214544
Hami City	2010	-0.0197672	-0.0196458	-0.0204501	-0.0215769	-0.0227575	-0.0217657	-0.0205107	-0.0232663	-0.020151	-0.0199268	-0.0223483	-0.0209433	-0.0212605	-0.0208577	-0.019853	-0.0215519
Hami City	2011	-0.0197475	-0.0196056	-0.0206074	-0.0216697	-0.0230095	-0.0216122	-0.0203916	-0.0237321	-0.0199188	-0.0199219	-0.021719	-0.0207417	-0.0219589	-0.0204885	-0.0211019	-0.0218359
Hami City	2012	-0.0197524	-0.0196126	-0.0203904	-0.0216595	-0.0231642	-0.0208901	-0.0198528	-0.0239504	-0.0193676	-0.0199152	-0.0216449	-0.0207329	-0.0218433	-0.0207458	-0.0211994	-0.0224051
Hami City	2013	-0.0198558	-0.019795	-0.0203143	-0.0218039	-0.0233764	-0.0200381	-0.0176802	-0.0238201	-0.0168539	-0.0199558	-0.021184	-0.020523	-0.0219829	-0.020879	-0.0212708	-0.0228755
Hami City	2014	-0.0198705	-0.0194683	-0.0202728	-0.0217776	-0.0237034	-0.0193673	-0.0145581	-0.0230982	-0.0131629	-0.0201664	-0.0210108	-0.0202536	-0.0221429	-0.0207997	-0.0212988	-0.0234323
Hami City	2015	-0.0198959	-0.0199276	-0.0202156	-0.0217206	-0.0237418	-0.0195753	-0.0172413	-0.0223362	-0.0163408	-0.020175	-0.0215422	-0.0202929	-0.0226401	-0.020865	-0.0214136	-0.0242363
Hami City	2016	-0.0198636	-0.0204841	-0.0202875	-0.0217533	-0.0236842	-0.01929	-0.0166821	-0.0226873	-0.0156823	-0.0202924	-0.0206146	-0.0203485	-0.021416	-0.0214315	-0.0208325	-0.0250915
Hami City	2017	-0.0198211	-0.0198759	-0.0202561	-0.0217541	-0.0239717	-0.0191033	-0.0176731	-0.0226412	-0.0168243	-0.0199609	-0.0206231	-0.0203133	-0.0214934	-0.0214543	-0.0254043	-0.0250125
Hami City	2018	-0.0198433	-0.0200579	-0.0202457	-0.0217723	-0.0240673	-0.0188919	-0.0163234	-0.0226643	-0.0153189	-0.019959	-0.0207206	-0.02003	-0.0216647	-0.0213393	-0.0258681	-0.0250006
Changji Hui Autonomous Prefecture	2000	-0.0200876	-0.0191554	-0.0197602	-0.0223009	-0.0184297	-0.0217355	-0.0211911	-0.0199106	-0.0209944	-0.0204949	-0.0210084	-0.0200265	-0.018755	-0.020239	-0.019087	-0.019818
Changji Hui Autonomous Prefecture	2001	-0.0198153	-0.0194353	-0.0197163	-0.0222783	-0.0192298	-0.0216899	-0.0214194	-0.0185456	-0.0212663	-0.0201662	-0.0208433	-0.0200258	-0.0188503	-0.0200707	-0.0180496	-0.0198809
Changji Hui Autonomous Prefecture	2002	-0.0200116	-0.0190845	-0.0197342	-0.0223155	-0.0192846	-0.0216367	-0.021534	-0.0200855	-0.0214165	-0.0204494	-0.0206124	-0.0200246	-0.019254	-0.0206134	-0.0186325	-0.0200033
Changji Hui Autonomous Prefecture	2003	-0.0201998	-0.0193546	-0.0197837	-0.0225383	-0.0194376	-0.0219056	-0.0215928	-0.020655	-0.0213585	-0.0207979	-0.0213345	-0.0200234	-0.0195318	-0.0208991	-0.0184351	-0.0199897
Changji Hui Autonomous Prefecture	2004	-0.0204035	-0.0190572	-0.0197247	-0.0226695	-0.0195903	-0.021762	-0.0213282	-0.0206235	-0.0210465	-0.020434	-0.0208978	-0.0200241	-0.0200971	-0.0214052	-0.0188639	-0.0203916
Changji Hui Autonomous Prefecture	2005	-0.0203138	-0.01917	-0.0197457	-0.0224753	-0.0193677	-0.0217108	-0.021547	-0.0210637	-0.0214291	-0.0209753	-0.0208471	-0.0200208	-0.0202434	-0.0214432	-0.0189235	-0.0205264
Changji Hui Autonomous Prefecture	2006	-0.0206795	-0.0237605	-0.0203268	-0.0224569	-0.019671	-0.0217279	-0.0215484	-0.0203423	-0.0214186	-0.0214889	-0.0208299	-0.0200262	-0.0201884	-0.0218053	-0.0189579	-0.020776
Changji Hui Autonomous Prefecture	2007	-0.0211143	-0.0210755	-0.0202484	-0.022075	-0.0194487	-0.0215569	-0.0214383	-0.0213329	-0.0212866	-0.0224823	-0.0208967	-0.0200172	-0.0207582	-0.0225072	-0.0191612	-0.021285
Changji Hui Autonomous Prefecture	2008	-0.0214379	-0.0203297	-0.0202067	-0.0222146	-0.0196509	-0.0216603	-0.0210551	-0.0224873	-0.0208385	-0.0227677	-0.0225268	-0.0200169	-0.0217792	-0.022751	-0.0194382	-0.0216336
Changji Hui Autonomous Prefecture	2009	-0.0212583	-0.0211963	-0.0204101	-0.0221959	-0.0197114	-0.0219367	-0.0207101	-0.0225581	-0.0204208	-0.0214462	-0.0214589	-0.0200172	-0.0220755	-0.0226634	-0.0213351	-0.0222581
Changji Hui Autonomous Prefecture	2010	-0.0212638	-0.0222006	-0.0203607	-0.0225945	-0.0197114	-0.0218677	-0.020262	-0.0225581	-0.0199277	-0.0210182	-0.0211726	-0.0200298	-0.0222899	-0.0223563	-0.0217307	-0.022365
Changji Hui Autonomous Prefecture	2011	-0.0218832	-0.0226859	-0.0203641	-0.0227194	-0.0202541	-0.0219447	-0.0197392	-0.0215857	-0.0193039	-0.0207606	-0.0212365	-0.0200508	-0.0227206	-0.0230888	-0.02132	-0.0226745
Changji Hui Autonomous Prefecture	2012	-0.0219161	-0.0231463	-0.0209196	-0.0227207	-0.0203741	-0.0220489	-0.0199123	-0.0226535	-0.0194078	-0.0206196	-0.0212146	-0.0201189	-0.0232492	-0.0231393	-0.0214301	-0.0232318
Changji Hui Autonomous Prefecture	2013	-0.0219411	-0.0237796	-0.0206596	-0.0226601	-0.0205738	-0.0225404	-0.0190487	-0.0226535	-0.0179175	-0.0203572	-0.0211653	-0.0200959	-0.023185	-0.0232805	-0.0216385	-0.0240971
Changji Hui Autonomous Prefecture	2014	-0.0218704	-0.0217402	-0.0204839	-0.0226196	-0.0211303	-0.0220677	-0.0186592	-0.0226627	-0.0171918	-0.0202609	-0.0212736	-0.0200874	-0.0231196	-0.0229011	-0.0218101	-0.0251288
Changji Hui Autonomous Prefecture	2015	-0.0221983	-0.0221252	-0.020313	-0.0224949	-0.0212886	-0.022302	-0.018589	-0.0226965	-0.0168428	-0.0202384	-0.020976	-0.0201204	-0.0232864	-0.0233334	-0.0219559	-0.0261494
Changji Hui Autonomous Prefecture	2016	-0.0219177	-0.0227707	-0.0203454	-0.0224239	-0.0216632	-0.0223212	-0.0187156	-0.0222435	-0.0168943	-0.0201932	-0.0208001	-0.0201394	-0.0224887	-0.0228876	-0.0205315	-0.027178
Changji Hui Autonomous Prefecture	2017	-0.0219948	-0.0246653	-0.0204627	-0.0223575	-0.022134	-0.022158	-0.0187907	-0.0228593	-0.0170896	-0.0200515	-0.0206804	-0.0201574	-0.0226948	-0.0228147	-0.0252992	-0.0279045
Changji Hui Autonomous Prefecture	2018	-0.0220234	-0.0237552	-0.0203018	-0.0222851	-0.0223489	-0.0215971	-0.0189965	-0.022552	-0.0174833	-0.0200847	-0.020615	-0.0202151	-0.023059	-0.0229057	-0.0258983	-0.0274816
prefectures and cities directly under Ili Kazak Autonomous Prefecture	2000	-0.0201712	-0.0197443	-0.0198089	-0.0219455	-0.0173148	-0.0210397	-0.0221912	-0.0237746	-0.0221969	-0.0214889	-0.0206158	-0.0203753	-0.0183725	-0.0200908	-0.0181305	-0.0194037
prefectures and cities directly under Ili Kazak Autonomous Prefecture	2001	-0.0203411	-0.0193253	-0.0197808	-0.0210388	-0.0184605	-0.021059	-0.0219349	-0.0203391	-0.0218855	-0.0205193	-0.0206928	-0.0205078	-0.0187192	-0.0165648	-0.0182048	-0.0193406
Counties (Cities) Direct Under Ili Prefecture	2002	-0.0204068	-0.0192656	-0.019817	-0.0215012	-0.0187287	-0.0213087	-0.0218723	-0.0228317	-0.0218145	-0.0208267	-0.0206007	-0.0203379	-0.0189336	-0.0196538	-0.0183138	-0.0194355
Counties (Cities) Direct Under Ili Prefecture	2003	-0.0203868	-0.0195109	-0.0198905	-0.0213411	-0.0192318	-0.0213815	-0.022023	-0.0229543	-0.0219971	-0.0225023	-0.0206212	-0.0202693	-0.0190002	-0.019818	-0.0183742	-0.0193411
Counties (Cities) Direct Under Ili Prefecture	2004	-0.0203774	-0.0195059	-0.0199034	-0.0212745	-0.0197316	-0.0212966	-0.0219553	-0.0229543	-0.0218993	-0.0224828	-0.0212214	-0.0205439	-0.0190121	-0.0198992	-0.0184762	-0.0194865
Counties (Cities) Direct Under Ili Prefecture	2005	-0.0204428	-0.0200107	-0.0199365	-0.0215405	-0.0202941	-0.0202357	-0.0217062	-0.0227979	-0.0216116	-0.0238944	-0.0210655	-0.0210635	-0.0190346	-0.0200374	-0.0185544	-0.0195031
Counties (Cities) Direct Under Ili Prefecture	2006	-0.0204191	-0.0194605	-0.0199184	-0.0215858	-0.0206137	-0.0201315	-0.0213805	-0.0228869	-0.0212191	-0.023869	-0.0207632	-0.020425	-0.0191829	-0.0200477	-0.0186571	-0.0195933
Counties (Cities) Direct Under Ili Prefecture	2007	-0.0203891	-0.019483	-0.0199042	-0.0214451	-0.0206536	-0.0200077	-0.0214018	-0.0230646	-0.0211969	-0.023571	-0.0207078	-0.0203261	-0.0194338	-0.0199563	-0.0188647	-0.0196688
Counties (Cities) Direct Under Ili Prefecture	2008	-0.0206798	-0.0194774	-0.019931	-0.0213952	-0.0210114	-0.0199643	-0.0214991	-0.0223423	-0.0212902	-0.0264686	-0.0208355	-0.0205042	-0.0196485	-0.0200211	-0.018981	-0.0197774
Counties (Cities) Direct Under Ili Prefecture	2009	-0.0211109	-0.0201821	-0.0201249	-0.0212901	-0.0208327	-0.0199216	-0.0213367	-0.0226258	-0.0210342	-0.0232477	-0.0213777	-0.0205455	-0.020076	-0.0201461	-0.0184226	-0.0199758
Counties (Cities) Direct Under Ili Prefecture	2010	-0.0214207	-0.0198375	-0.0200739	-0.0212899	-0.0208327	-0.0200814	-0.0210833	-0.0226412	-0.0207055	-0.0234678	-0.0224545	-0.021862	-0.0208986	-0.0201043	-0.0184502	-0.0200278
Counties (Cities) Direct Under Ili Prefecture	2011	-0.0209994	-0.0198136	-0.0201186	-0.0215929	-0.0209915	-0.0198052	-0.0211834	-0.0227088	-0.0208149	-0.0231122	-0.0210015	-0.0254437	-0.0206548	-0.0197831	-0.0200927	-0.0201421
Counties (Cities) Direct Under Ili Prefecture	2012	-0.0211148	-0.0204017	-0.0201475	-0.0216107	-0.020932	-0.0197714	-0.0211733	-0.0227733	-0.0208104	-0.0226603	-0.0209917	-0.0252829	-0.0212074	-0.0197518	-0.0201505	-0.0203624
Counties (Cities) Direct Under Ili Prefecture	2013	-0.0212733	-0.0217924	-0.0203876	-0.0216973	-0.020932	-0.0198548	-0.0205339	-0.0232754	-0.0200279	-0.0229153	-0.0209158	-0.0253465	-0.0214	-0.0197221	-0.0201457	-0.0205159
Counties (Cities) Direct Under Ili Prefecture	2014	-0.0211764	-0.0203913	-0.0202524	-0.0216595	-0.0208923	-0.0204303	-0.0204361	-0.0232998	-0.0198171	-0.0227934	-0.0207304	-0.0250801	-0.0215404	-0.0196539	-0.0201373	-0.020761
Counties (Cities) Direct Under Ili Prefecture	2015	-0.0213706	-0.020837	-0.0201431	-0.0215274	-0.0210312	-0.0207107	-0.0213962	-0.022194	-0.0210926	-0.021505	-0.0209441	-0.0256266	-0.0219887	-0.0196748	-0.020164	-0.0209605
Counties (Cities) Direct Under Ili Prefecture	2016	-0.021355	-0.0214835	-0.0202847	-0.0221984	-0.0209122	-0.020678	-0.0213904	-0.0221507	-0.0210582	-0.0216024	-0.0219505	-0.0276542	-0.0208895	-0.0197102	-0.0189429	-0.0214531
Counties (Cities) Direct Under Ili Prefecture	2017	-0.0215761	-0.0203083	-0.0202675	-0.0215085	-0.0217419	-0.0205099	-0.0214233	-0.0217724	-0.0210808	-0.0216348	-0.0228607	-0.0283472	-0.021138	-0.0200549	-0.0244556	-0.0216824
Counties (Cities) Direct Under Ili Prefecture	2018	-0.0218165	-0.0203491	-0.0202274	-0.021525	-0.0218989	-0.0195457	-0.0215683	-0.0219618	-0.0212419	-0.0215647	-0.0209683	-0.0351148	-0.0213472	-0.02028	-0.0259387	-0.0218082
Tarbagatai Administrative Offices	2000	-0.0198252	-0.018964	-0.0196939	-0.0218076	-0.0182077	-0.0222547	-0.022579	-0.0205319	-0.0226729	-0.0208432	-0.0206197	-0.020031	-0.0188265	-0.0203577	-0.0191773	-0.0195806
Tarbagatai Administrative Offices	2001	-0.0197424	-0.0189598	-0.0196727	-0.0220772	-0.0182098	-0.0225957	-0.0225911	-0.0204972	-0.0226823	-0.0207477	-0.0206007	-0.020048	-0.0186715	-0.0202689	-0.0217957	-0.0196592
Tarbagatai Administrative Offices	2002	-0.0197899	-0.0189367	-0.0196635	-0.0221934	-0.0182489	-0.0226345	-0.0224748	-0.0201807	-0.0225414	-0.0205816	-0.0206007	-0.0200356	-0.0188146	-0.0204414	-0.0195802	-0.0197426
Tarbagatai Administrative Offices	2003	-0.0198054	-0.0189387	-0.019639	-0.0226097	-0.0182468	-0.0227296	-0.0224378	-0.0211264	-0.0225077	-0.0221376	-0.0206007	-0.0200229	-0.0186261	-0.0204909	-0.0186465	-0.0193501
Tarbagatai Administrative Offices	2004	-0.0196815	-0.0189453	-0.0196388	-0.0214757	-0.0182448	-0.0229549	-0.0224188	-0.0211577	-0.0224735	-0.0212313	-0.0206007	-0.0200924	-0.0188967	-0.020543	-0.018646	-0.0193598
Tarbagatai Administrative Offices	2005	-0.0197133	-0.0190517	-0.0196998	-0.0211279	-0.0174169	-0.0230982	-0.0225175	-0.0211264	-0.0225756	-0.0214967	-0.0206007	-0.0202077	-0.0188801	-0.020609	-0.0184756	-0.0195372
Tarbagatai Administrative Offices	2006	-0.0196514	-0.0189416	-0.0196409	-0.0220769	-0.0177078	-0.0228649	-0.0224845	-0.0197864	-0.0225328	-0.0210648	-0.020678	-0.0202906	-0.019222	-0.0205647	-0.0185188	-0.0196117
Tarbagatai Administrative Offices	2007	-0.0196417	-0.0189635	-0.0196644	-0.0220446	-0.0183065	-0.0230652	-0.0224846	-0.0216262	-0.0225215	-0.0212419	-0.0206115	-0.0200537	-0.0193428	-0.020593	-0.0183362	-0.0196863
Tarbagatai Administrative Offices	2008	-0.0196667	-0.0190473	-0.0196539	-0.0215138	-0.018941	-0.0228534	-0.0225812	-0.022367	-0.0226272	-0.0210892	-0.0206145	-0.0200919	-0.0196237	-0.0204536	-0.018383	-0.0197781
Tarbagatai Administrative Offices	2009	-0.0197577	-0.0205625	-0.0202758	-0.0216488	-0.0183887	-0.0227249	-0.0226619	-0.0224565	-0.0227388	-0.0207902	-0.0206522	-0.0200784	-0.0196991	-0.0203406	-0.0201115	-0.0199843
Tarbagatai Administrative Offices	2010	-0.0197776	-0.0200332	-0.0201183	-0.0226162	-0.0182448	-0.0223063	-0.0224246	-0.0224996	-0.0224382	-0.0204686	-0.0206007	-0.0202805	-0.0192422	-0.020182	-0.020155	-0.0199531
Tarbagatai Administrative Offices	2011	-0.0198116	-0.0200771	-0.020239	-0.0226682	-0.0186347	-0.0224765	-0.0223768	-0.0226566	-0.0223951	-0.0202619	-0.0206007	-0.0202547	-0.0200549	-0.0201614	-0.0203447	-0.0201695
Tarbagatai Administrative Offices	2012	-0.0197832	-0.0191337	-0.0198116	-0.0224591	-0.0186142	-0.0222224	-0.02229	-0.0227242	-0.022291	-0.0201501	-0.0207683	-0.020237	-0.0204919	-0.0201377	-0.0204233	-0.0203634
Tarbagatai Administrative Offices	2013	-0.0198005	-0.0192766	-0.0198367	-0.0224052	-0.0187165	-0.0226755	-0.022327	-0.0232113	-0.022337	-0.0205034	-0.0206853	-0.0202877	-0.0206967	-0.0199578	-0.0205015	-0.0206494
Tarbagatai Administrative Offices	2014	-0.0198544	-0.0195804	-0.0198551	-0.0223641	-0.0186756	-0.0223529	-0.0222936	-0.0231288	-0.0223063	-0.0202968	-0.0207321	-0.0202627	-0.0211485	-0.0198253	-0.0205786	-0.0209669
Tarbagatai Administrative Offices	2015	-0.0198638	-0.0194692	-0.0198729	-0.0221994	-0.0184297	-0.022823	-0.0225835	-0.023501	-0.022661	-0.0200699	-0.0206011	-0.0203369	-0.0216909	-0.0199849	-0.0207251	-0.0216841
Tarbagatai Administrative Offices	2016	-0.0198539	-0.0193799	-0.019856	-0.0223597	-0.0179355	-0.0230102	-0.0225985	-0.0230691	-0.022717	-0.0201898	-0.0223639	-0.0204441	-0.0211945	-0.0199213	-0.0191904	-0.0222265
Tarbagatai Administrative Offices	2017	-0.0198227	-0.0193044	-0.0198479	-0.0222375	-0.0188186	-0.0229054	-0.0225203	-0.0226351	-0.0226491	-0.0203159	-0.0206007	-0.0204974	-0.0213039	-0.0197682	-0.0251459	-0.022578
Tarbagatai Administrative Offices	2018	-0.0198548	-0.019421	-0.0198595	-0.0223215	-0.01808	-0.0225301	-0.0225843	-0.0228524	-0.0227053	-0.0201643	-0.0207448	-0.0207441	-0.0218708	-0.0199055	-0.0267412	-0.0224721
Altay Administrative Offices	2000	-0.0197186	-0.0190519	-0.0197277	-0.0205972	-0.0181356	-0.0231134	-0.022454	-0.0210731	-0.0224655	-0.0209711	-0.0206309	-0.020341	-0.0199025	-0.0204201	-0.0192053	-0.0196953
Altay Administrative Offices	2001	-0.0197035	-0.0189763	-0.0196133	-0.0210369	-0.0183126	-0.0229438	-0.022505	-0.021189	-0.0225202	-0.020576	-0.0206007	-0.02025	-0.019632	-0.0203009	-0.0196601	-0.0197588
Altay Administrative Offices	2002	-0.019741	-0.0189958	-0.0196351	-0.0211006	-0.0186101	-0.0228962	-0.0225441	-0.0214391	-0.0225772	-0.0205541	-0.0208948	-0.0205251	-0.0192659	-0.0205345	-0.0192513	-0.0198472
Altay Administrative Offices	2003	-0.0197457	-0.0190001	-0.0196448	-0.0214915	-0.0189695	-0.0225631	-0.022662	-0.0215015	-0.0227272	-0.0226089	-0.0206007	-0.0203405	-0.0188967	-0.0204976	-0.0195457	-0.0201393
Altay Administrative Offices	2004	-0.0197709	-0.0190675	-0.0196887	-0.0211541	-0.0193272	-0.021875	-0.0227293	-0.0216573	-0.0228093	-0.0208211	-0.0206007	-0.020465	-0.0193108	-0.020547	-0.0196303	-0.02008
Altay Administrative Offices	2005	-0.0196447	-0.0196108	-0.019814	-0.0214256	-0.0194487	-0.0221752	-0.0226135	-0.0216573	-0.0226474	-0.0201636	-0.0206007	-0.0207427	-0.0187359	-0.0202689	-0.0197895	-0.0202919
Altay Administrative Offices	2006	-0.0196774	-0.0190043	-0.0196705	-0.0211673	-0.020773	-0.020747	-0.022683	-0.0213048	-0.0227187	-0.0200183	-0.0206007	-0.0204624	-0.0190382	-0.0201944	-0.0203138	-0.0202761
Altay Administrative Offices	2007	-0.0196936	-0.0189448	-0.0196225	-0.0206427	-0.0212688	-0.0203794	-0.0225489	-0.0209727	-0.0225463	-0.0200728	-0.0206007	-0.0203716	-0.0192244	-0.019931	-0.0201252	-0.0203587
Altay Administrative Offices	2008	-0.019672	-0.0189568	-0.0196305	-0.0204674	-0.0214465	-0.0200272	-0.0225057	-0.0216791	-0.0224969	-0.0206299	-0.0229396	-0.0202411	-0.0194916	-0.0197291	-0.0202551	-0.0204328
Altay Administrative Offices	2009	-0.0197834	-0.0193076	-0.0199955	-0.0204246	-0.0209519	-0.0212385	-0.0224558	-0.0215327	-0.0224307	-0.0211067	-0.0206442	-0.0202086	-0.0198849	-0.0194821	-0.0196854	-0.0207382
Altay Administrative Offices	2010	-0.0199207	-0.0191152	-0.0198552	-0.0210781	-0.0212886	-0.0211641	-0.0223579	-0.0221476	-0.0223052	-0.0214292	-0.0243995	-0.0209411	-0.020542	-0.0195318	-0.019825	-0.0208662
Altay Administrative Offices	2011	-0.0200863	-0.0191077	-0.0198958	-0.0208439	-0.0216632	-0.0209035	-0.0222217	-0.0246442	-0.0221204	-0.0214051	-0.0212676	-0.0212599	-0.0204663	-0.0194783	-0.0214468	-0.0209734
Altay Administrative Offices	2012	-0.0201316	-0.0192693	-0.0199698	-0.02097	-0.0216829	-0.0205946	-0.0226342	-0.0159129	-0.0226163	-0.021255	-0.0214131	-0.0217103	-0.0210017	-0.0197308	-0.0215873	-0.0212593
Altay Administrative Offices	2013	-0.0200955	-0.0193506	-0.019917	-0.0211412	-0.0217419	-0.0213362	-0.0225256	-0.0152017	-0.0225985	-0.0213466	-0.021393	-0.0226461	-0.0213666	-0.0195989	-0.0216454	-0.0215855
Altay Administrative Offices	2014	-0.0200284	-0.0193931	-0.0199355	-0.0212295	-0.0218008	-0.0216637	-0.0220608	-0.0221538	-0.0221507	-0.0217725	-0.0214344	-0.0224674	-0.021545	-0.0193912	-0.0215742	-0.0219604
Altay Administrative Offices	2015	-0.0199927	-0.0195386	-0.0199641	-0.0211906	-0.0214663	-0.022301	-0.0224254	-0.0222126	-0.0225986	-0.0209782	-0.0213582	-0.0232187	-0.0224584	-0.0194844	-0.0215775	-0.0226115
Altay Administrative Offices	2016	-0.019822	-0.019693	-0.0199184	-0.0213234	-0.0211303	-0.0225451	-0.0222096	-0.0223655	-0.0223726	-0.0211886	-0.0206007	-0.0238981	-0.0209053	-0.0192783	-0.020234	-0.023586
Altay Administrative Offices	2017	-0.0198063	-0.0192617	-0.0198759	-0.0211685	-0.022134	-0.022563	-0.0220422	-0.0225181	-0.0221828	-0.0212233	-0.0206007	-0.0243138	-0.0211671	-0.0192615	-0.025689	-0.0236318
Altay Administrative Offices	2018	-0.0198255	-0.0194025	-0.0198842	-0.0218086	-0.0220361	-0.0225651	-0.0220222	-0.0224418	-0.0221597	-0.0208862	-0.0206007	-0.0212962	-0.0211734	-0.0194175	-0.0266872	-0.0235717
Bortala Mongolian Autonomous Prefecture	2000	-0.0196975	-0.0192217	-0.0197495	-0.022122	-0.0170977	-0.0233661	-0.0223969	-0.018869	-0.0224505	-0.0268553	-0.0207278	-0.0200626	-0.019325	-0.020348	-0.0179056	-0.019539
Bortala Mongolian Autonomous Prefecture	2001	-0.0197112	-0.0194992	-0.0197855	-0.0220925	-0.0176953	-0.0234462	-0.0224248	-0.0193516	-0.0224927	-0.0258838	-0.0206007	-0.0200375	-0.0193605	-0.0208529	-0.0180941	-0.0196486
Bortala Mongolian Autonomous Prefecture	2002	-0.0198077	-0.0194328	-0.0198141	-0.0217122	-0.0179871	-0.0234199	-0.0224053	-0.0206865	-0.0224701	-0.0296561	-0.0206007	-0.0200464	-0.0195966	-0.021065	-0.0180185	-0.019768
Bortala Mongolian Autonomous Prefecture	2003	-0.0197093	-0.019938	-0.0198458	-0.0220435	-0.0177441	-0.0235416	-0.0224865	-0.0212829	-0.0225648	-0.0318229	-0.0206102	-0.0200182	-0.0195223	-0.0206017	-0.0181211	-0.0195708
Bortala Mongolian Autonomous Prefecture	2004	-0.0196463	-0.0197466	-0.0198042	-0.0221626	-0.0175002	-0.0234758	-0.0223183	-0.0216573	-0.0223391	-0.0348958	-0.0206007	-0.0200606	-0.0200257	-0.0203935	-0.0182599	-0.0196835
Bortala Mongolian Autonomous Prefecture	2005	-0.0196558	-0.0193588	-0.019845	-0.0221505	-0.0194892	-0.0215004	-0.0224401	-0.0218439	-0.0224846	-0.0307033	-0.0206516	-0.0200575	-0.0198097	-0.0207424	-0.0183252	-0.0195757
Bortala Mongolian Autonomous Prefecture	2006	-0.0196547	-0.0195878	-0.0199357	-0.0222403	-0.0196307	-0.0216569	-0.0226538	-0.0212798	-0.0227635	-0.0285327	-0.0206007	-0.0201053	-0.0203088	-0.0207453	-0.0184536	-0.0195807
Bortala Mongolian Autonomous Prefecture	2007	-0.0196751	-0.0198377	-0.0203751	-0.0221294	-0.0192663	-0.0217683	-0.0225791	-0.0200283	-0.0226647	-0.0271939	-0.0206007	-0.0200559	-0.0200491	-0.0206555	-0.0186747	-0.0196284
Bortala Mongolian Autonomous Prefecture	2008	-0.0197679	-0.0190609	-0.0198243	-0.0220328	-0.0198525	-0.0216092	-0.022474	-0.0209162	-0.0225244	-0.0273705	-0.0222327	-0.0200896	-0.0203018	-0.0206644	-0.0187694	-0.0197736
Bortala Mongolian Autonomous Prefecture	2009	-0.019773	-0.0190839	-0.0202784	-0.0220843	-0.0196509	-0.0217474	-0.0222909	-0.0214204	-0.0223008	-0.0231746	-0.0208994	-0.0200776	-0.0202948	-0.0205719	-0.018647	-0.019924
Bortala Mongolian Autonomous Prefecture	2010	-0.0197753	-0.0190662	-0.0202884	-0.0222807	-0.0181212	-0.0221329	-0.0222373	-0.0209884	-0.0222265	-0.0212963	-0.0206007	-0.0207343	-0.0209588	-0.0202248	-0.0190549	-0.0197857
Bortala Mongolian Autonomous Prefecture	2011	-0.0197436	-0.0190004	-0.0203378	-0.0222766	-0.0187165	-0.0219158	-0.0223572	-0.0209382	-0.0223792	-0.0229375	-0.0206007	-0.0208759	-0.0213608	-0.0199304	-0.0202674	-0.0199274
Bortala Mongolian Autonomous Prefecture	2012	-0.0197584	-0.0190152	-0.0201433	-0.0222513	-0.0195094	-0.0218268	-0.0224419	-0.0193612	-0.0224598	-0.0235843	-0.0206007	-0.0207957	-0.0216794	-0.0200618	-0.0203608	-0.020106
Bortala Mongolian Autonomous Prefecture	2013	-0.0196751	-0.0193154	-0.0201565	-0.0223126	-0.0202541	-0.0218337	-0.0222881	-0.0201395	-0.0222673	-0.0232196	-0.0206007	-0.020665	-0.0219349	-0.0197675	-0.0203084	-0.0203764
Bortala Mongolian Autonomous Prefecture	2014	-0.0196459	-0.0193589	-0.020195	-0.0223166	-0.0208724	-0.0185853	-0.0223659	-0.0199806	-0.0223672	-0.0222067	-0.0206108	-0.020643	-0.0222569	-0.0195082	-0.020292	-0.020617
Bortala Mongolian Autonomous Prefecture	2015	-0.0196679	-0.0193169	-0.020232	-0.0221387	-0.021249	-0.0182408	-0.0226144	-0.0217382	-0.0227012	-0.0219917	-0.0206007	-0.0208467	-0.0222854	-0.0195751	-0.0204461	-0.0209479
Bortala Mongolian Autonomous Prefecture	2016	-0.0197047	-0.0193333	-0.0201185	-0.0180341	-0.0212293	-0.017548	-0.0225806	-0.0210323	-0.0226441	-0.0210431	-0.0208175	-0.0210648	-0.0209969	-0.0197674	-0.0195567	-0.0213925
Bortala Mongolian Autonomous Prefecture	2017	-0.019704	-0.0190207	-0.0201181	-0.0220765	-0.0219774	-0.0174609	-0.0225484	-0.021999	-0.022604	-0.0212702	-0.0206007	-0.021246	-0.0218042	-0.0196579	-0.0242758	-0.0217193
Bortala Mongolian Autonomous Prefecture	2018	-0.0197392	-0.0190907	-0.0201148	-0.0221012	-0.0217026	-0.0174639	-0.0226155	-0.0216314	-0.0226871	-0.0211152	-0.0206007	-0.0201512	-0.0213214	-0.0198248	-0.0248056	-0.0220031
Bayangol Mongolian Autonomous Prefecture	2000	-0.0198386	-0.01899	-0.0197577	-0.0214631	-0.0221496	-0.0193652	-0.0217421	-0.0208061	-0.0219334	-0.0200477	-0.0206007	-0.0201943	-0.0206269	-0.0203167	-0.0177314	-0.020228
Bayangol Mongolian Autonomous Prefecture	2001	-0.0198	-0.0189771	-0.0197193	-0.0217486	-0.0221046	-0.0196355	-0.0208396	-0.0209696	-0.0212108	-0.0200138	-0.0207463	-0.0200636	-0.0205571	-0.020507	-0.0183634	-0.0203216
Bayangol Mongolian Autonomous Prefecture	2002	-0.0199264	-0.0193093	-0.0197737	-0.0216948	-0.0220929	-0.0199595	-0.0214069	-0.0214391	-0.0216817	-0.0200009	-0.0208942	-0.0200657	-0.0199846	-0.0209212	-0.0188354	-0.0204216
Bayangol Mongolian Autonomous Prefecture	2003	-0.0199043	-0.0209191	-0.0200134	-0.0217639	-0.0221135	-0.0198927	-0.0210252	-0.0218128	-0.0209624	-0.0199562	-0.021149	-0.0200589	-0.0202807	-0.0208168	-0.0191249	-0.0200767
Bayangol Mongolian Autonomous Prefecture	2004	-0.0199892	-0.0190376	-0.0197853	-0.0216477	-0.022134	-0.0198684	-0.021073	-0.0226474	-0.0213269	-0.0199543	-0.020767	-0.0201304	-0.0203076	-0.0208362	-0.0193912	-0.0205116
Bayangol Mongolian Autonomous Prefecture	2005	-0.0199761	-0.0189784	-0.0197866	-0.0217824	-0.0226021	-0.0196623	-0.0214467	-0.0227703	-0.0216938	-0.0199183	-0.0206181	-0.0201053	-0.0205094	-0.021298	-0.019593	-0.0198479
Bayangol Mongolian Autonomous Prefecture	2006	-0.0198728	-0.0190793	-0.0198195	-0.0218084	-0.0228933	-0.0193606	-0.0213581	-0.0222188	-0.0215819	-0.0199678	-0.0208298	-0.0200799	-0.0206618	-0.021032	-0.0199005	-0.0196385
Bayangol Mongolian Autonomous Prefecture	2007	-0.019922	-0.0189954	-0.0198532	-0.0219492	-0.0226993	-0.019649	-0.0215058	-0.0223632	-0.0217087	-0.0200664	-0.0206048	-0.0200939	-0.0212421	-0.0212507	-0.0202822	-0.0197245
Bayangol Mongolian Autonomous Prefecture	2008	-0.020095	-0.0237538	-0.0209536	-0.021959	-0.0231642	-0.0194867	-0.0213503	-0.0224376	-0.0216283	-0.0201317	-0.0206007	-0.0200658	-0.021324	-0.0212679	-0.0203955	-0.0197191
Bayangol Mongolian Autonomous Prefecture	2009	-0.0203468	-0.0230962	-0.0205548	-0.0222074	-0.0224463	-0.0169697	-0.0211907	-0.0225119	-0.0213798	-0.0199579	-0.0206007	-0.0200695	-0.0216346	-0.0212218	-0.0193726	-0.0200007
Bayangol Mongolian Autonomous Prefecture	2010	-0.0207031	-0.023995	-0.0209745	-0.0221834	-0.0222708	-0.0204427	-0.0210134	-0.0216916	-0.0212125	-0.0199451	-0.0209571	-0.0201085	-0.0221965	-0.0215888	-0.0195103	-0.0200289
Bayangol Mongolian Autonomous Prefecture	2011	-0.0207184	-0.0239619	-0.0211478	-0.0222783	-0.0223879	-0.0195714	-0.02101	-0.0214891	-0.0211796	-0.0199475	-0.0209817	-0.020137	-0.0219715	-0.0210657	-0.0210005	-0.0200482
Bayangol Mongolian Autonomous Prefecture	2012	-0.0207618	-0.0221347	-0.0213942	-0.0222505	-0.0222317	-0.0202754	-0.0210191	-0.0215904	-0.0211333	-0.0199398	-0.0209804	-0.0202388	-0.0220412	-0.0210751	-0.0212844	-0.0202401
Bayangol Mongolian Autonomous Prefecture	2013	-0.021001	-0.0226016	-0.0209281	-0.022248	-0.0221731	-0.0206249	-0.0207516	-0.0211734	-0.0207147	-0.0199397	-0.0209684	-0.0201892	-0.022381	-0.0213109	-0.0215411	-0.0202458
Bayangol Mongolian Autonomous Prefecture	2014	-0.0209502	-0.0211944	-0.02102	-0.0222562	-0.0223489	-0.0206691	-0.0211283	-0.021411	-0.0211486	-0.0199419	-0.0209093	-0.0201296	-0.0226797	-0.0212405	-0.0217169	-0.0202936
Bayangol Mongolian Autonomous Prefecture	2015	-0.0208102	-0.0214301	-0.0211145	-0.0221593	-0.0221535	-0.0200225	-0.0214607	-0.0212923	-0.0215424	-0.0199874	-0.0209142	-0.02016	-0.0227896	-0.0210956	-0.0218052	-0.0207906
Bayangol Mongolian Autonomous Prefecture	2016	-0.0206525	-0.0218682	-0.0208653	-0.0194159	-0.0212688	-0.020926	-0.0215589	-0.0213517	-0.0215619	-0.0200178	-0.0206007	-0.0202129	-0.0225666	-0.0218457	-0.0218478	-0.0214283
Bayangol Mongolian Autonomous Prefecture	2017	-0.0210286	-0.0223909	-0.0205551	-0.0221369	-0.021997	-0.0211707	-0.0214184	-0.021322	-0.021288	-0.0200048	-0.0209594	-0.0202674	-0.0232765	-0.0225143	-0.0261355	-0.0216602
Bayangol Mongolian Autonomous Prefecture	2018	-0.0211384	-0.0218703	-0.0206134	-0.0221269	-0.0226215	-0.0208412	-0.0213867	-0.0213368	-0.021284	-0.0199532	-0.0206007	-0.0200381	-0.023997	-0.0228897	-0.0270036	-0.0218971
Aksu Administrative Offices	2000	-0.0199331	-0.0192084	-0.0197673	-0.0201857	-0.0163447	-0.0212907	-0.0224022	-0.0217693	-0.0225542	-0.0198922	-0.02077	-0.0200317	-0.0186118	-0.0196727	-0.0176221	-0.0191555
Aksu Administrative Offices	2001	-0.0200653	-0.0191012	-0.0197124	-0.0209172	-0.0171039	-0.0213377	-0.0222265	-0.0220919	-0.022431	-0.0199212	-0.0206007	-0.0201958	-0.0186954	-0.0201406	-0.0191206	-0.0192007
Aksu Administrative Offices	2002	-0.0199486	-0.0191392	-0.0197607	-0.0203234	-0.0173503	-0.0215507	-0.021841	-0.021906	-0.0220926	-0.0198881	-0.020617	-0.0201513	-0.0186357	-0.020068	-0.0176366	-0.0192488
Aksu Administrative Offices	2003	-0.0199915	-0.0191807	-0.01978	-0.0211258	-0.0177161	-0.0213088	-0.0218609	-0.0221848	-0.0220929	-0.0198908	-0.0221871	-0.0200703	-0.0186452	-0.0203069	-0.0178008	-0.0192804
Aksu Administrative Offices	2004	-0.0201238	-0.0190772	-0.0197888	-0.0214282	-0.01808	-0.0216878	-0.021708	-0.0224318	-0.0219045	-0.0198993	-0.0212583	-0.0204018	-0.0186082	-0.0206456	-0.0179424	-0.0194789
Aksu Administrative Offices	2005	-0.0199539	-0.0190342	-0.0198846	-0.0213436	-0.0177078	-0.0219115	-0.0205567	-0.0225858	-0.0208456	-0.019933	-0.0206007	-0.0202551	-0.0185795	-0.020738	-0.0179703	-0.0196117
Aksu Administrative Offices	2006	-0.020003	-0.0194023	-0.0200229	-0.0214309	-0.0179355	-0.0218402	-0.0202055	-0.0227611	-0.0205038	-0.0199258	-0.0206559	-0.0200722	-0.0188801	-0.0207381	-0.0179531	-0.0195861
Aksu Administrative Offices	2007	-0.0197626	-0.0199877	-0.0198358	-0.0210068	-0.0183065	-0.0217107	-0.0200017	-0.0224934	-0.0202709	-0.0199267	-0.0206007	-0.0200368	-0.0196497	-0.020852	-0.0179748	-0.0196714
Aksu Administrative Offices	2008	-0.0199474	-0.019294	-0.0199087	-0.0206743	-0.0187982	-0.022466	-0.0204633	-0.0232968	-0.0207038	-0.0199838	-0.0207107	-0.0200449	-0.0195801	-0.0206828	-0.018016	-0.0198409
Aksu Administrative Offices	2009	-0.0204515	-0.0209092	-0.0200983	-0.0209494	-0.0188186	-0.0218341	-0.0202976	-0.0234005	-0.0204878	-0.020022	-0.0206007	-0.0200392	-0.0200421	-0.020358	-0.0199867	-0.0199571
Aksu Administrative Offices	2010	-0.0206461	-0.0204103	-0.0199859	-0.0212548	-0.018696	-0.0215758	-0.0201569	-0.0232021	-0.0203606	-0.0200897	-0.0206007	-0.0201805	-0.0204872	-0.0200782	-0.0199645	-0.019793
Aksu Administrative Offices	2011	-0.0204065	-0.0203449	-0.0199609	-0.0209117	-0.0192866	-0.0215595	-0.0195828	-0.0228838	-0.0198363	-0.020073	-0.0207438	-0.0201215	-0.0207849	-0.0198741	-0.0202773	-0.0199258
Aksu Administrative Offices	2012	-0.0204893	-0.0196811	-0.0200032	-0.020976	-0.0194082	-0.0217399	-0.0196635	-0.0230033	-0.0198465	-0.020145	-0.0211755	-0.0201203	-0.0209797	-0.01981	-0.0203029	-0.0200839
Aksu Administrative Offices	2013	-0.0208793	-0.0198511	-0.0200111	-0.0211254	-0.0193069	-0.0220779	-0.019567	-0.0205761	-0.0196179	-0.0201234	-0.0211816	-0.0200927	-0.021385	-0.0198955	-0.0202655	-0.0203653
Aksu Administrative Offices	2014	-0.0203634	-0.0209199	-0.0200465	-0.0211892	-0.019792	-0.0218797	-0.0195336	-0.021211	-0.0194419	-0.020096	-0.0211189	-0.0200506	-0.0213493	-0.019502	-0.020167	-0.0205515
Aksu Administrative Offices	2015	-0.020385	-0.0205223	-0.0200792	-0.0212893	-0.0198323	-0.0220116	-0.020415	-0.0208942	-0.0205441	-0.0199849	-0.0206849	-0.0200488	-0.021507	-0.0196301	-0.0183692	-0.02063
Aksu Administrative Offices	2016	-0.0204645	-0.0203004	-0.0200184	-0.0191719	-0.019792	-0.0219275	-0.0208649	-0.0214875	-0.0210666	-0.019946	-0.0209248	-0.0200556	-0.0210755	-0.0197474	-0.0188351	-0.0210315
Aksu Administrative Offices	2017	-0.0210126	-0.0194605	-0.019879	-0.0210898	-0.0207531	-0.0215385	-0.0208098	-0.0220764	-0.0209768	-0.0199917	-0.0206007	-0.0200559	-0.0216412	-0.0202813	-0.026307	-0.0211888
Aksu Administrative Offices	2018	-0.0216412	-0.0195183	-0.0199225	-0.021086	-0.0206336	-0.0214085	-0.0208465	-0.0217825	-0.0210181	-0.019971	-0.0206007	-0.020052	-0.0216949	-0.0208427	-0.027254	-0.0212079
Kizilsu Kirgiz Autonomous Prefecture	2000	-0.0196998	-0.0189192	-0.0196133	-0.0183155	-0.0174294	-0.0226906	-0.0223815	-0.0167364	-0.0224697	-0.0212191	-0.0206007	-0.0200265	-0.0190643	-0.0196159	-0.0178335	-0.0189212
Kizilsu Kirgiz Autonomous Prefecture	2001	-0.0197103	-0.0189192	-0.0196133	-0.0210135	-0.0189797	-0.0227691	-0.0229362	-0.0159028	-0.0231123	-0.02058	-0.0206007	-0.0228149	-0.0189217	-0.0202765	-0.0178939	-0.0189316
Kizilsu Kirgiz Autonomous Prefecture	2002	-0.0197464	-0.0189192	-0.0196133	-0.0167386	-0.019179	-0.0226308	-0.0228972	-0.0173359	-0.0230603	-0.0202942	-0.0206007	-0.0225049	-0.0185998	-0.0206202	-0.0185986	-0.0189513
Kizilsu Kirgiz Autonomous Prefecture	2003	-0.0197635	-0.0189192	-0.0196133	-0.0193071	-0.0194153	-0.0228423	-0.0229332	-0.0174018	-0.0231085	-0.0205502	-0.0206007	-0.0204532	-0.0187812	-0.0210687	-0.0182935	-0.0189729
Kizilsu Kirgiz Autonomous Prefecture	2004	-0.0197665	-0.0189192	-0.0196133	-0.0193199	-0.0196509	-0.0230003	-0.0227799	-0.0176321	-0.0229079	-0.0213501	-0.0206229	-0.0201269	-0.0186154	-0.0212268	-0.0184869	-0.0190593
Kizilsu Kirgiz Autonomous Prefecture	2005	-0.0196971	-0.0189192	-0.0196133	-0.0193459	-0.0196307	-0.0230327	-0.0231386	-0.0184158	-0.0233568	-0.0216379	-0.0206007	-0.0205478	-0.0186309	-0.0212858	-0.0185817	-0.0189965
Kizilsu Kirgiz Autonomous Prefecture	2006	-0.0196825	-0.0189192	-0.0196133	-0.0191018	-0.020234	-0.0231114	-0.0231221	-0.0187592	-0.023337	-0.0220115	-0.0206007	-0.0213345	-0.0190156	-0.0215097	-0.0185164	-0.0190363
Kizilsu Kirgiz Autonomous Prefecture	2007	-0.0196808	-0.0189589	-0.0196133	-0.018824	-0.0206137	-0.0221656	-0.0231112	-0.0184158	-0.0233138	-0.0243383	-0.0210476	-0.0210953	-0.0198461	-0.0209365	-0.0185557	-0.0190674
Kizilsu Kirgiz Autonomous Prefecture	2008	-0.0196683	-0.018977	-0.0196357	-0.01868	-0.0209122	-0.0229271	-0.0230842	-0.019085	-0.0232605	-0.0237646	-0.0361075	-0.0221264	-0.0201697	-0.0198572	-0.0186144	-0.0191192
Kizilsu Kirgiz Autonomous Prefecture	2009	-0.019651	-0.0211629	-0.0199449	-0.0183995	-0.0211105	-0.0224591	-0.0230379	-0.0194733	-0.0232372	-0.0213006	-0.0215219	-0.0217373	-0.0208418	-0.019876	-0.0210554	-0.0191509
Kizilsu Kirgiz Autonomous Prefecture	2010	-0.0196792	-0.0204142	-0.0198742	-0.0178333	-0.0216435	-0.022218	-0.0225758	-0.0180544	-0.022722	-0.0206925	-0.0234693	-0.0271703	-0.0212801	-0.0197317	-0.0210181	-0.019211
Kizilsu Kirgiz Autonomous Prefecture	2011	-0.0196598	-0.0204712	-0.0199335	-0.0180805	-0.0218989	-0.0221029	-0.0223566	-0.0181881	-0.0225034	-0.0208273	-0.0222847	-0.0224476	-0.0216381	-0.019307	-0.021365	-0.0192428
Kizilsu Kirgiz Autonomous Prefecture	2012	-0.0197049	-0.0199635	-0.0198845	-0.0173235	-0.0222317	-0.0220999	-0.0222856	-0.0180544	-0.0222837	-0.0210972	-0.0206225	-0.022084	-0.0217023	-0.0194522	-0.0216352	-0.0193104
Kizilsu Kirgiz Autonomous Prefecture	2013	-0.0197471	-0.0198035	-0.0197975	-0.0181478	-0.0224658	-0.0215243	-0.0220833	-0.0201966	-0.0220377	-0.0214264	-0.0206007	-0.0221646	-0.021332	-0.0196595	-0.0216329	-0.0193756
Kizilsu Kirgiz Autonomous Prefecture	2014	-0.0197982	-0.0194948	-0.0197368	-0.0188166	-0.0226993	-0.021317	-0.0224354	-0.0197577	-0.0225012	-0.0215591	-0.0217999	-0.021304	-0.0214092	-0.0198452	-0.0214791	-0.0194816
Kizilsu Kirgiz Autonomous Prefecture	2015	-0.0197778	-0.0194831	-0.0196811	-0.0186259	-0.0227963	-0.0214227	-0.02265	-0.0201125	-0.0226206	-0.0206772	-0.0212772	-0.0212051	-0.0219361	-0.0195648	-0.0213405	-0.0195978
Kizilsu Kirgiz Autonomous Prefecture	2016	-0.0197116	-0.0195314	-0.0197124	-0.0217486	-0.022641	-0.0215075	-0.0225515	-0.0204656	-0.0223651	-0.020795	-0.020783	-0.0213816	-0.022774	-0.0195984	-0.0188883	-0.0197692
Kizilsu Kirgiz Autonomous Prefecture	2017	-0.0198079	-0.0193565	-0.0196759	-0.0187495	-0.0232607	-0.020264	-0.0225254	-0.0207274	-0.0224511	-0.0209044	-0.0206171	-0.0212034	-0.0223093	-0.0199008	-0.0275432	-0.0197471
Kizilsu Kirgiz Autonomous Prefecture	2018	-0.0197417	-0.0193471	-0.0196893	-0.019656	-0.0232028	-0.0201258	-0.0227747	-0.0210595	-0.0228096	-0.0202623	-0.0206165	-0.0202105	-0.0224744	-0.0200154	-0.0287878	-0.0197944
Kashgar Administrative Offices	2000	-0.0201901	-0.0189213	-0.0196133	-0.0190453	-0.0145997	-0.021868	-0.0228634	-0.0168328	-0.0230658	-0.0202047	-0.0206323	-0.0242251	-0.0177465	-0.0193886	-0.0202854	-0.0189016
Kashgar Administrative Offices	2001	-0.0201857	-0.0189249	-0.0196167	-0.0179802	-0.0149984	-0.0220314	-0.0229468	-0.019831	-0.0231396	-0.0199833	-0.020687	-0.0224167	-0.0177707	-0.0198191	-0.0174231	-0.0189179
Kashgar Administrative Offices	2002	-0.020664	-0.0189243	-0.0196162	-0.0178112	-0.0153108	-0.0218247	-0.022861	-0.0195437	-0.0230435	-0.019947	-0.0206265	-0.0216328	-0.0177465	-0.0202736	-0.0173833	-0.0189342
Kashgar Administrative Offices	2003	-0.0209083	-0.0189516	-0.0196526	-0.0182435	-0.0160331	-0.0218098	-0.0228578	-0.0207495	-0.0230277	-0.0200039	-0.0207212	-0.0212106	-0.0177332	-0.0206681	-0.0176012	-0.018999
Kashgar Administrative Offices	2004	-0.0207453	-0.0189864	-0.0196497	-0.0183203	-0.0167475	-0.021644	-0.0228397	-0.0181783	-0.022993	-0.0200917	-0.0207715	-0.0233219	-0.0178396	-0.020852	-0.0176502	-0.0190601
Kashgar Administrative Offices	2005	-0.0204723	-0.0189694	-0.0196537	-0.0184447	-0.016884	-0.0215256	-0.0227634	-0.0182174	-0.0228977	-0.020186	-0.02061	-0.0208662	-0.0178794	-0.0207358	-0.0176401	-0.0191394
Kashgar Administrative Offices	2006	-0.0205486	-0.0189643	-0.0196299	-0.0184593	-0.0170202	-0.0215482	-0.022797	-0.0182174	-0.0229413	-0.0209484	-0.0206528	-0.0213346	-0.0179385	-0.0212607	-0.0176767	-0.0192361
Kashgar Administrative Offices	2007	-0.0205798	-0.0196253	-0.0197148	-0.0192165	-0.0171562	-0.0216363	-0.0227671	-0.0182174	-0.022904	-0.0219498	-0.0207948	-0.0213215	-0.0185843	-0.0215621	-0.0176945	-0.0193702
Kashgar Administrative Offices	2008	-0.0206768	-0.0193834	-0.0198077	-0.0189222	-0.0172919	-0.0216644	-0.0227803	-0.0190206	-0.0229179	-0.0223552	-0.0206007	-0.0208508	-0.0187216	-0.0211119	-0.0179214	-0.0194615
Kashgar Administrative Offices	2009	-0.0217629	-0.0209895	-0.0196912	-0.0192714	-0.0175002	-0.021563	-0.022778	-0.0204024	-0.0229211	-0.0208337	-0.0206007	-0.0207143	-0.01919	-0.0210254	-0.0180225	-0.0196335
Kashgar Administrative Offices	2010	-0.0218149	-0.0204994	-0.0197855	-0.0189706	-0.0171667	-0.0221308	-0.0228563	-0.0203676	-0.0230185	-0.0206444	-0.0206673	-0.0214805	-0.019859	-0.0207544	-0.020051	-0.0195323
Kashgar Administrative Offices	2011	-0.0212268	-0.0206087	-0.0197913	-0.0198445	-0.0184708	-0.0218496	-0.0228191	-0.0195661	-0.0229752	-0.0205847	-0.0206007	-0.0213815	-0.0202387	-0.0201877	-0.0207426	-0.0197703
Kashgar Administrative Offices	2012	-0.0218785	-0.0200699	-0.0197248	-0.0201288	-0.0188798	-0.0217687	-0.0228351	-0.0199965	-0.0229888	-0.0204827	-0.0207594	-0.0209836	-0.0202422	-0.0204416	-0.0211075	-0.0199425
Kashgar Administrative Offices	2013	-0.0220643	-0.0199205	-0.019742	-0.0206288	-0.019469	-0.0217908	-0.0228543	-0.0191734	-0.0230045	-0.0207941	-0.0206553	-0.0205274	-0.020422	-0.0205847	-0.0211123	-0.0202281
Kashgar Administrative Offices	2014	-0.0219649	-0.0198262	-0.0197358	-0.0207513	-0.019671	-0.0216855	-0.0229498	-0.018341	-0.02312	-0.020658	-0.0206542	-0.0201634	-0.0204126	-0.0204328	-0.021041	-0.0202251
Kashgar Administrative Offices	2015	-0.0217597	-0.0197486	-0.0197302	-0.020623	-0.0198525	-0.021994	-0.0228866	-0.0183963	-0.0230507	-0.0204538	-0.0207546	-0.0201697	-0.0210792	-0.0203044	-0.0211568	-0.0203513
Kashgar Administrative Offices	2016	-0.0217608	-0.0197998	-0.0197268	-0.0226196	-0.0188186	-0.0225258	-0.0229283	-0.0188658	-0.0231093	-0.0210107	-0.0206007	-0.0202045	-0.0215926	-0.0205382	-0.0210813	-0.0206813
Kashgar Administrative Offices	2017	-0.0234081	-0.0196647	-0.0197314	-0.0204066	-0.0193677	-0.0223877	-0.0229308	-0.0186314	-0.0231139	-0.0210196	-0.0206032	-0.0203084	-0.0218237	-0.0213574	-0.0288515	-0.0207028
Kashgar Administrative Offices	2018	-0.0232532	-0.0196583	-0.0197251	-0.0204307	-0.0193475	-0.0223832	-0.0229479	-0.0187487	-0.023131	-0.0204361	-0.0206271	-0.0200419	-0.0218367	-0.0217367	-0.0290341	-0.0208547
Hotan Administrative Offices	2000	-0.0199516	-0.0190058	-0.0196231	-0.0156775	-0.0143754	-0.0222708	-0.0225719	-0.0195117	-0.0227204	-0.0203727	-0.0206007	-0.0202395	-0.0179759	-0.0190729	-0.0165935	-0.018768
Hotan Administrative Offices	2001	-0.019934	-0.0190147	-0.0196376	-0.0132239	-0.0148232	-0.0227424	-0.0227683	-0.0195117	-0.0229255	-0.0203803	-0.0206007	-0.0204369	-0.0179879	-0.0193487	-0.0178357	-0.0187618
Hotan Administrative Offices	2002	-0.0199922	-0.0189751	-0.019615	-0.0127955	-0.0152312	-0.022806	-0.0228123	-0.0187075	-0.0229565	-0.0200932	-0.0206007	-0.0203333	-0.0180843	-0.0194666	-0.0166415	-0.0187624
Hotan Administrative Offices	2003	-0.020139	-0.0190969	-0.0196492	-0.0147936	-0.0158021	-0.022434	-0.0228682	-0.016939	-0.0230297	-0.0198914	-0.0206007	-0.0201042	-0.0182453	-0.0192911	-0.0172851	-0.0187609
Hotan Administrative Offices	2004	-0.0203992	-0.018963	-0.019615	-0.0151554	-0.016368	-0.0221987	-0.0228426	-0.0172303	-0.0229998	-0.0199697	-0.0206007	-0.0209863	-0.0181131	-0.019698	-0.0173049	-0.0189605
Hotan Administrative Offices	2005	-0.0200386	-0.0191637	-0.0196214	-0.015814	-0.0165369	-0.0218314	-0.0228841	-0.0173293	-0.0230493	-0.0199195	-0.0206007	-0.0223852	-0.0182861	-0.0195378	-0.0173837	-0.018868
Hotan Administrative Offices	2006	-0.0200203	-0.0192499	-0.0196451	-0.0160777	-0.0175625	-0.0216441	-0.0228746	-0.017855	-0.0230337	-0.0199058	-0.0206007	-0.0206835	-0.0186106	-0.019444	-0.0174218	-0.0189305
Hotan Administrative Offices	2007	-0.0199671	-0.0332449	-0.019999	-0.0162489	-0.017604	-0.0215761	-0.0227916	-0.0174413	-0.0229346	-0.0199178	-0.0206007	-0.0206984	-0.0183065	-0.0196229	-0.0174296	-0.0189723
Hotan Administrative Offices	2008	-0.0201118	-0.0192265	-0.0196625	-0.0168821	-0.0178528	-0.0213876	-0.0228352	-0.0175335	-0.0229792	-0.0201078	-0.0206007	-0.020748	-0.0190928	-0.0198676	-0.017497	-0.019004
Hotan Administrative Offices	2009	-0.0202375	-0.0194598	-0.0197173	-0.0172544	-0.0184708	-0.0214296	-0.0228201	-0.0175499	-0.0229328	-0.0198898	-0.0206007	-0.0206106	-0.0203321	-0.0198044	-0.0189619	-0.0190167
Hotan Administrative Offices	2010	-0.0205585	-0.0194042	-0.0197045	-0.0178318	-0.0186347	-0.0214367	-0.0228614	-0.0171411	-0.0229829	-0.0199085	-0.0206007	-0.0209745	-0.0209646	-0.0195135	-0.0191149	-0.0190269
Hotan Administrative Offices	2011	-0.0204733	-0.0193327	-0.0196905	-0.0186456	-0.0192461	-0.0218233	-0.0229293	-0.0169788	-0.0230605	-0.0198974	-0.0206445	-0.021307	-0.0211474	-0.0192023	-0.0211228	-0.0190367
Hotan Administrative Offices	2012	-0.0217951	-0.0192914	-0.0196791	-0.0187949	-0.019469	-0.0216855	-0.0229633	-0.0166332	-0.0230852	-0.0199014	-0.0206007	-0.0209963	-0.0215013	-0.0197116	-0.0211495	-0.0190661
Hotan Administrative Offices	2013	-0.0219998	-0.0192384	-0.0196575	-0.0192664	-0.0194892	-0.0217728	-0.022863	-0.0163326	-0.0229567	-0.019908	-0.0206007	-0.0203103	-0.0217815	-0.0197353	-0.0211378	-0.0190878
Hotan Administrative Offices	2014	-0.0212361	-0.0191579	-0.0196492	-0.0193682	-0.0197719	-0.0210153	-0.0229177	-0.0163326	-0.0230322	-0.0199022	-0.0206007	-0.0201083	-0.0217218	-0.0190826	-0.020925	-0.0191149
Hotan Administrative Offices	2015	-0.0215854	-0.0191286	-0.0196414	-0.0195496	-0.0203141	-0.0209925	-0.0229209	-0.0156869	-0.0229086	-0.0198991	-0.0217281	-0.0201041	-0.0219246	-0.0189846	-0.0207022	-0.0191266
Hotan Administrative Offices	2016	-0.021422	-0.0191336	-0.0196701	-0.0213392	-0.0201939	-0.0209189	-0.0228481	-0.0139075	-0.0229945	-0.0199111	-0.0206905	-0.0201246	-0.025004	-0.0188543	-0.0177471	-0.0191788
Hotan Administrative Offices	2017	-0.0221077	-0.0190292	-0.019626	-0.0195377	-0.0212095	-0.0207964	-0.0229009	-0.0153276	-0.0230557	-0.0198986	-0.0206007	-0.0201398	-0.0228297	-0.0192849	-0.0266558	-0.0192056
Hotan Administrative Offices	2018	-0.0222656	-0.0190306	-0.0196386	-0.0195748	-0.0211699	-0.0206214	-0.0228568	-0.0146216	-0.0230014	-0.01992	-0.0206007	-0.0200368	-0.0230011	-0.0195689	-0.0273787	-0.019198
ej		0.997883	0.997683	0.997838	0.999138	0.997823	0.99884	0.998228	0.998545	0.99831	0.998958	0.999653	0.999244	0.998674	0.998843	0.997146	0.998379
gj		0.00211743	0.00231665	0.00216214	0.000862281	0.00217704	0.00115955	0.00177181	0.00145485	0.00168986	0.00104219	0.00034738	0.000755969	0.00132567	0.00115687	0.00285418	0.00162072
wj		0.0853301	0.0933585	0.0871317	0.0347489	0.0877321	0.0467284	0.071402	0.058629	0.0680995	0.0419991	0.013999	0.0304647	0.0534231	0.0466206	0.11502	0.0653132
																			comprehensive index of economic high quality development
Urumqi City	2000	0.0199858	0.021568	0.0153811	0.0311776	0.0859449	0.0407554	0.0389814	0.0135865	0.0359508	0.00225425	0.000646357	0.00954122	0.0145818	0.0169507	0.0204163	0.0177235		0.385446	0.385446
Urumqi City	2001	0.0287384	0.0162497	0.0111963	0.0302796	0.0861843	0.0332945	0.0378757	0.0221702	0.0347763	0.00132011	0.000629785	0.00932392	0.0203511	0.0276662	0.0211027	0.0178591		0.399018	0.399018
Urumqi City	2002	0.0281675	0.0210077	0.0195976	0.0304754	0.085929	0.036545	0.0392457	0.0256809	0.0356913	0.00138476	0.000576739	0.0089187	0.0179729	0.0281947	0.03996	0.0192546		0.438602	0.438602
Urumqi City	2003	0.0361192	0.0205105	0.0179862	0.0308085	0.0858731	0.0365065	0.0398876	0.0204148	0.0366709	0.00216444	0.000233506	0.00333447	0.0266621	0.0305264	0.0450407	0.0185419		0.451281	0.451281
Urumqi City	2004	0.0362855	0.0222599	0.0168727	0.0310015	0.0858173	0.0368556	0.0405151	0.0228723	0.0372444	0.00327602	0.000576448	0.00387387	0.0315991	0.0312036	0.0488884	0.02165		0.470792	0.470792
Urumqi City	2005	0.0383456	0.019596	0.0175604	0.0288447	0.0858173	0.0359607	0.040845	0.0230479	0.0372338	0.00404256	0.000582941	0.00426755	0.0233635	0.031959	0.0514854	0.0238689		0.466821	0.466821
Urumqi City	2006	0.0456176	0.0172365	0.0134981	0.0305626	0.0861364	0.0353235	0.0418365	0.0156929	0.0377929	0.00337709	0.0015175	0.00499328	0.0305993	0.033651	0.0443401	0.0261564		0.468332	0.468332
Urumqi City	2007	0.0478782	0.0166359	0.0144282	0.0318906	0.0850194	0.0336645	0.0437348	0.0231707	0.0395613	0.00405888	0.0016061	0.00459034	0.0317004	0.0338722	0.0479704	0.0259988		0.485781	0.485781
Urumqi City	2008	0.0568985	0.033244	0.0166989	0.0318506	0.0853386	0.0314645	0.0442835	0.0209765	0.0392663	0.00412851	0.000221159	0.00283947	0.0296304	0.0370704	0.0533013	0.0285862		0.515799	0.515799
Urumqi City	2009	0.0769553	0.0355768	0.0226757	0.0321588	0.0858173	0.041334	0.0465505	0.0385828	0.0401908	0.00268278	0.00139434	0.00261847	0.0335501	0.0449702	0.0499418	0.0338459		0.588845	0.588845
Urumqi City	2010	0.0853301	0.0343841	0.0225808	0.0323582	0.0858173	0.0398273	0.046862	0.0395482	0.0401421	0.00351101	0.000403448	0.00462387	0.024971	0.0466206	0.0551195	0.0322247		0.594324	0.594324
Urumqi City	2011	0.0770629	0.0323422	0.0244955	0.032493	0.0861364	0.0313661	0.0467216	0.0420057	0.0401191	0.00400295	0.00070813	0.00276264	0.036514	0.0428581	0.0633693	0.0361207		0.599078	0.599078
Urumqi City	2012	0.0758989	0.0389186	0.0300482	0.0328904	0.0861364	0.0294814	0.0499011	0.04341	0.0432959	0.00380309	0.000877443	0.00292801	0.0349549	0.0406997	0.0650865	0.0389715		0.617302	0.617302
Urumqi City	2013	0.0774859	0.0462238	0.0295982	0.0327738	0.086296	0.0295132	0.0531333	0.0449899	0.0468616	0.0025432	0.000792367	0.00276363	0.0348625	0.0397096	0.0671156	0.0441965		0.638859	0.638859
Urumqi City	2014	0.0778539	0.0491774	0.0266349	0.0318211	0.0864556	0.0291509	0.0536088	0.0460431	0.0480202	0.00239719	0.000723444	0.00163472	0.0371129	0.0400581	0.0679703	0.0476486		0.646311	0.646311
Urumqi City	2015	0.0717482	0.0496117	0.0257798	0.031338	0.086296	0.0305706	0.0566408	0.0492027	0.0518059	0.00160254	0.000902198	0.00196589	0.0380158	0.0376959	0.0696141	0.0504748		0.653265	0.653265
Urumqi City	2016	0.0692529	0.0569633	0.0266707	0.0314229	0.0864556	0.0286794	0.0588755	0.0502559	0.0540817	0.00153432	0.000109033	0.00480614	0.0379996	0.036187	0.0675914	0.0624774		0.673363	0.673363
Urumqi City	2017	0.0694412	0.046905	0.0226026	0.03151	0.0867747	0.0281084	0.0578176	0.0518358	0.052718	0.00195211	3.04731e-05	0.00496956	0.0506394	0.0455068	0.100032	0.0653132		0.716157	0.716157
Urumqi City	2018	0.0693177	0.04938	0.0236582	0.0316923	0.0869343	0.0291253	0.0583214	0.0520113	0.0530963	0.00192036	4.56341e-06	0.00195771	0.0534231	0.0457213	0.109503	0.0629627		0.72903	0.72903
Karamay City	2000	0.00147568	0.0692425	0.0416897	0.0281727	0.0876204	0.032259	0.00419624	0.0232058	0.00972544	0.000318707	0	4.02498e-05	0.0131285	0.0166399	0.0843656	0.0101967		0.422277	0.422277
Karamay City	2001	0.000478036	0.0544815	0.0425191	0.0252451	0.0877321	0.0145219	0.00461305	0.047974	0.0103377	0.000317949	0	1.18703e-05	0.0123357	0.0125141	0.11502	0.0081275		0.43623	0.43623
Karamay City	2002	0.000726224	0.0574484	0.0414562	0.0293478	0.0877002	0.0278039	0.00648719	0.0330534	0.0114626	0.000280562	0	1.17968e-05	0.0144056	0.0124887	0.0679173	0.00911794		0.399708	0.399708
Karamay City	2003	0.000647977	0.0336701	0.0529491	0.0304977	0.0877162	0.029015	0.0050761	0.038144	0.0105709	0.000304831	3.636e-05	6.74194e-06	0.016524	0.0150871	0.0978691	0.00689077		0.425006	0.425006
Karamay City	2004	0.000540389	0.0479591	0.0720882	0.0307403	0.0877321	0.020214	0.00171032	0.0425323	0.0075269	0.00020892	0	2.00946e-05	0.0220599	0.0159195	0.0917296	0.00581798		0.4468	0.4468
Karamay City	2005	0.000672429	0.054778	0.0871317	0.0318916	0.0875726	0.00924434	0.000627885	0.0425323	0.00680898	0.000190558	1.34509e-06	3.38496e-05	0.0216988	0.0177275	0.0874465	0.00535233		0.453711	0.453711
Karamay City	2006	0.00147323	0.0466179	0.0744096	0.0318041	0.0875726	0.00777919	0.00800523	0.0483426	0.0144826	0.000135688	0	1.80294e-05	0.0223109	0.0211222	0.0842372	0.00448367		0.452795	0.452795
Karamay City	2007	0.00266038	0.0483197	0.0766951	0.0319643	0.087413	0.00600494	0.0127976	0.0536438	0.0185054	0.000197689	7.01203e-07	1.14485e-05	0.0157313	0.0259265	0.0745147	0.00502909		0.459416	0.459416
Karamay City	2008	0.00280342	0.0356967	0.0587995	0.0322296	0.087413	0.00442643	0.0142212	0.0526432	0.0199431	0.000147818	0	1.01207e-05	0.0199856	0.0265955	0.0742331	0.00383298		0.432981	0.432981
Karamay City	2009	0.00278508	0.0655063	0.0858881	0.0321971	0.0870938	0.0126281	0.00900952	0.0535384	0.0151161	0.000296979	0	1.23005e-05	0.0190167	0.02654	0.0836314	0.00745892		0.500719	0.500719
Karamay City	2010	0.00219334	0.0441122	0.0797064	0.0337583	0.087413	0.00970479	0.00409877	0.0537666	0.00973795	0.000307199	0	1.79174e-05	0.0102658	0.025801	0.0868505	0.00645149		0.454185	0.454185
Karamay City	2011	0.00186324	0.0420901	0.0790697	0.0337317	0.0872534	0.00822231	0.0025428	0.0537842	0.00908261	0.000436279	0.000191353	1.52889e-05	0.0183297	0.0244567	0.0903289	0.0070304		0.458429	0.458429
Karamay City	2012	0.00161628	0.0705998	0.0518953	0.0336292	0.0872534	0.00562231	0.00395963	0.0538018	0.0101868	0.000213811	0.000212066	4.38669e-05	0.0150486	0.0229358	0.105909	0.0085568		0.471484	0.471484
Karamay City	2013	0.00177644	0.0393587	0.0495981	0.0341035	0.0872534	0.00437315	0.00290415	0.0538193	0.00949339	0.000654006	0.000200208	5.37146e-05	0.0147271	0.0234542	0.111411	0.0103237		0.443504	0.443504
Karamay City	2014	0.0018718	0.0631702	0.0477372	0.0334256	0.0872534	0	0	0.0540124	0.00698855	0.000428059	0	8.07141e-05	0.0161408	0.0230606	0.111116	0.0114333		0.456719	0.456719
Karamay City	2015	0.0016933	0.0650988	0.0459556	0.0333232	0.0869343	0.00981649	0.00926205	0.0545215	0.0148163	0.000107197	0	0.000153863	0.0158105	0.0219602	0.110595	0.0193438		0.489392	0.489392
Karamay City	2016	0.00194882	0.045737	0.0394304	0.0334789	0.0867747	0.003347	0.00737571	0.0540826	0.0126189	0.000161411	0.00401568	0.000183938	0.0170482	0.0232206	0.0965551	0.0228656		0.448845	0.448845
Karamay City	2017	0.00202585	0.0434835	0.0437341	0.033539	0.0870938	0.00478627	0.012582	0.05403	0.0170629	9.42214e-05	0	0.000206761	0.0188815	0.0234355	0.106105	0.0190174		0.466077	0.466077
Karamay City	2018	0.00321177	0.0347001	0.0393254	0.0336368	0.0872534	0.00497884	0.0160061	0.0544512	0.0193885	0.000111755	0	0.000153459	0.0199837	0.0262057	0.114986	0.0155006		0.469893	0.469893
Turpan City	2000	0.000339883	0.00275706	0.000990311	0.0259634	0.0682964	0.025741	0.0602438	0.0332992	0.0578992	0.000182987	5.2573e-05	0.0044388	0.00339552	0.0119142	0.00927467	0.00366838		0.308457	0.308457
Turpan City	2001	0.000265304	0.00280062	0.00111775	0.0273873	0.0707219	0.0258648	0.0637064	0.0348088	0.0608865	6.66087e-05	0	0.00371868	0.00370381	0.0122306	0.0087112	0.0035483		0.319539	0.319539
Turpan City	2002	0.000782463	0.00300775	0.00170396	0.0270387	0.0707538	0.02802	0.0651479	0.0476229	0.0619559	2.26887e-05	0.000197864	0.00267239	0.0048929	0.012849	0.0101509	0.0063221		0.343141	0.343141
Turpan City	2003	0.000861932	0.00288647	0.00136562	0.0281483	0.0704666	0.0269021	0.0657138	0.0542933	0.0623754	3.7755e-05	0.000173792	0.00106142	0.00560636	0.0123849	0.0104139	0.00351074		0.346202	0.346202
Turpan City	2004	0.000431577	0.000856698	0.00071363	0.0310224	0.0701793	0.0260374	0.0630687	0.0542933	0.0605441	5.11265e-05	0	0.00443901	0.00471233	0.012043	0.0104565	0.00529571		0.344145	0.344145
Turpan City	2005	0.00034355	0.000582552	0.000624214	0.0316905	0.0716155	0.0244079	0.0615143	0.0548199	0.0592801	1.39777e-05	0.000547974	0.00210091	0.0048929	0.0114745	0.0105015	0.00550014		0.33991	0.33991
Turpan City	2006	0.000166273	0.00543993	0.0044903	0.0315677	0.0733707	0.0251217	0.0605503	0.0177993	0.0581682	2.40172e-05	0	0.00278398	0.0046815	0.0106724	0.0126206	0.0057232		0.31318	0.31318
Turpan City	2007	0.00018828	0.00719944	0.00834335	0.0314102	0.072892	0.0263149	0.0575987	0.0311225	0.0540422	2.62849e-05	2.65966e-05	0.00512544	0.00410017	0.00946908	0.0117149	0.00556109		0.325135	0.325135
Turpan City	2008	0.000102698	0.0105729	0.002055	0.0310216	0.0733707	0.0269311	0.0551497	0.0310347	0.0512081	2.82669e-05	8.19748e-05	0.00163905	0.00447451	0.00887457	0.012908	0.00579185		0.315245	0.315245
Turpan City	2009	0.00114068	0.0595949	0.00424057	0.0305039	0.067307	0.036443	0.0540931	0.0310786	0.0496625	5.28456e-05	3.98855e-05	0.00207226	0.00419266	0.00902302	0.0282694	0.00857276		0.386287	0.386287
Turpan City	2010	0.000780018	0.0458773	0.00497269	0.0292042	0.0668283	0.037207	0.0466528	0.0233682	0.0413854	3.78807e-05	0	0.006727	0.00476959	0.00833681	0.031538	0.00890027		0.356585	0.356585
Turpan City	2011	0.00103432	0.0473386	0.0049889	0.0289105	0.0687432	0.0351711	0.0415462	0.0156578	0.0352879	0.000101249	0	0.00540284	0.00542139	0.00808896	0.0415105	0.00688385		0.346087	0.346087
Turpan City	2012	0.00118348	0.0648781	0.0104203	0.0292402	0.0660305	0.0360138	0.0405907	0.00961937	0.0335297	0.000101983	0.000123203	0.00419111	0.00659286	0.00850171	0.0469423	0.00767676		0.365636	0.365636
Turpan City	2013	0.000789799	0.0628426	0.0131465	0.029435	0.0637965	0.0361303	0.0385564	0.0377227	0.0312213	0.00025347	0.000129731	0.00161174	0.00954798	0.00764718	0.0458069	0.00829166		0.38693	0.38693
Turpan City	2014	0.000853374	0.0522618	0.011568	0.0296687	0.0623603	0.0379809	0.0430796	0.0416722	0.0350912	0.000100456	2.9924e-06	0.00138438	0.0110982	0.00735825	0.0444181	0.0103435		0.389242	0.389242
Turpan City	2015	0.00105877	0.054973	0.00938609	0.0290647	0.0531052	0.0465949	0.048641	0.0492203	0.0409119	0.000143389	0.000244871	0.00168018	0.0125824	0.0073204	0.0389321	0.016068		0.409927	0.409927
Turpan City	2016	0.00101353	0.0421726	0.00917874	0.0290311	0.0521478	0.0449232	0.0444358	0.0501155	0.0355504	7.25403e-05	0	0.00196848	0.014094	0.00834005	0.036912	0.0169847		0.38694	0.38694
Turpan City	2017	0.000656536	0.0256886	0.00821132	0.0291115	0.0599668	0.042026	0.0368866	0.0460255	0.0252482	2.50369e-05	0	0.00206625	0.0171033	0.00828023	0.0925755	0.0170093		0.410881	0.410881
Turpan City	2018	0.000826477	0.0150295	0.00692651	0.0293172	0.0626795	0.0404761	0.0377299	0.0480705	0.0247624	7.80785e-05	3.03623e-06	0.00187347	0.0171194	0.00894692	0.105597	0.0166488		0.416085	0.416085
Hami City	2000	0.000685878	0.00103156	0.001333	0.022033	0.0567754	0.0399219	0.0570603	0.039952	0.0517742	0.00124472	0.000224801	7.84975e-05	0.0103539	0.0142167	0.0177905	0.00576696		0.320243	0.320243
Hami City	2001	0.000413238	0.0025722	0.000573221	0.0305345	0.0600306	0.0409472	0.0574219	0.0409525	0.0516674	0.00144171	3.89027e-05	0.000168461	0.0100456	0.0131249	0.0209778	0.00604549		0.336956	0.336956
Hami City	2002	0.000814251	0.00241605	0.000685958	0.0225588	0.0618657	0.0420477	0.0566813	0.0420057	0.0510507	0.000780341	4.55389e-05	0.000216995	0.0106622	0.0150476	0.0180396	0.00636509		0.331283	0.331283
Hami City	2003	0.000858265	0.00217032	0.000509118	0.0245336	0.0608364	0.0423957	0.0561823	0.043059	0.0503428	0.000980112	2.19781e-05	8.22967e-06	0.00945549	0.0149888	0.0197541	0.00646458		0.332561	0.332561
Hami City	2004	0.00071522	0.00120355	0.000559301	0.0258056	0.0598072	0.0426221	0.0535587	0.0462186	0.0469267	0.000526556	0.000270305	0.000435193	0.0116663	0.0174029	0.0229542	0.00750752		0.33818	0.33818
Hami City	2005	0.000276307	0.000648273	0.00023398	0.0268019	0.0626795	0.0389985	0.0537606	0.0397238	0.0476432	0.000370128	0.000172135	0.00197039	0.00974616	0.0168889	0.0265903	0.00696543		0.33347	0.33347
Hami City	2006	0.000273862	0.00120316	0.00064482	0.0276106	0.0639561	0.0377536	0.0527054	0.0396711	0.0462959	0.000650685	0.000591826	0.00223721	0.0102923	0.0170002	0.0330692	0.0078654		0.341822	0.341822
Hami City	2007	0.000212732	0.0015598	0.00100098	0.0281422	0.0634773	0.0378287	0.0543044	0.0446563	0.0480321	0.000572795	8.76935e-05	0.00141388	0.0113228	0.0166128	0.033435	0.00906938		0.351729	0.351729
Hami City	2008	0.00018828	0.000669581	0.00170345	0.0304876	0.0660305	0.0240258	0.0549982	0.0489921	0.0490312	0.000399179	0.00190916	0.00112509	0.0121023	0.0158373	0.0348744	0.00912785		0.351502	0.351502
Hami City	2009	0.000590515	0.00678351	0.004951	0.0304924	0.0634773	0.0375179	0.0515079	0.0510985	0.045408	0.000374442	0.000380976	0.0010309	0.0118601	0.0157007	0.0245005	0.0115691		0.357244	0.357244
Hami City	2010	0.000662649	0.00436834	0.004539	0.0305002	0.0652326	0.0381823	0.0518651	0.0506421	0.0456483	9.91077e-05	0.00146135	0.00172411	0.0131593	0.015013	0.0278779	0.0119954		0.362971	0.362971
Hami City	2011	0.000558728	0.00412542	0.00539803	0.0308426	0.067307	0.0374526	0.0509948	0.0533278	0.044057	8.65937e-05	0.000931418	0.00134712	0.015837	0.0136875	0.0388895	0.0132402		0.378083	0.378083
Hami City	2012	0.000584402	0.00416781	0.00421348	0.0308051	0.0685836	0.034037	0.0470737	0.0545917	0.0402991	6.9529e-05	0.000869315	0.00133062	0.0153922	0.0146104	0.0397564	0.0157482		0.372132	0.372132
Hami City	2013	0.0011309	0.00527056	0.00379891	0.0313384	0.0703389	0.030047	0.0315498	0.0538369	0.0235182	0.000173554	0.000484159	0.000939376	0.0159294	0.0150897	0.0403921	0.0178335		0.341672	0.341672
Hami City	2014	0.00120915	0.00329686	0.00357338	0.0312412	0.0730516	0.0269364	0.0100795	0.0496767	0	0.000715184	0.000340014	0.000438521	0.016546	0.0148042	0.0406409	0.0203176		0.292867	0.292867
Hami City	2015	0.00134364	0.00607335	0.00326217	0.0310307	0.0733707	0.0278983	0.0284706	0.0453234	0.0201661	0.000737442	0.000783341	0.000511492	0.0184706	0.0150391	0.0416647	0.0239331		0.338079	0.338079
Hami City	2016	0.00117247	0.0094605	0.00365289	0.0311516	0.072892	0.0265798	0.0245755	0.0473245	0.015903	0.00104006	1.146e-05	0.000614805	0.0137533	0.0170853	0.0364991	0.0278156		0.329532	0.329532
Hami City	2017	0.000947514	0.00576035	0.00348235	0.0311543	0.0752856	0.0257201	0.0315	0.0470612	0.0233237	0.000186789	1.84939e-05	0.000549425	0.0140494	0.0171679	0.0781355	0.0274552		0.381798	0.381798
Hami City	2018	0.00106488	0.00686454	0.00342561	0.0312218	0.0760834	0.024749	0.0220943	0.0471928	0.013569	0.000181876	9.91951e-05	2.42909e-05	0.0147062	0.0167513	0.0824839	0.0274013		0.367913	0.367913
Changji Hui Autonomous Prefecture	2000	0.00235962	0.00141544	0.000793016	0.0331827	0.0306057	0.0380387	0.0568625	0.0317369	0.0514681	0.00156316	0.000338045	1.7722e-05	0.00374785	0.0127953	0.0212133	0.00449212		0.29063	0.29063
Changji Hui Autonomous Prefecture	2001	0.000916949	0.00309804	0.000556034	0.0330987	0.0368609	0.0378217	0.0585491	0.0242766	0.0533575	0.000714801	0.000200901	1.64538e-05	0.00410017	0.0121949	0.0122961	0.0047612		0.28282	0.28282
Changji Hui Autonomous Prefecture	2002	0.00195616	0.000990117	0.000652503	0.033237	0.0372917	0.037569	0.0593975	0.0327023	0.0544042	0.00144536	9.60883e-06	1.42261e-05	0.00559755	0.0141352	0.0172908	0.0052858		0.301979	0.301979
Changji Hui Autonomous Prefecture	2003	0.00295502	0.00261256	0.000920038	0.0340673	0.0384965	0.0388489	0.0598334	0.035862	0.0539997	0.00234819	0.000609701	1.19738e-05	0.0066325	0.0151619	0.0155952	0.00522731		0.313182	0.313182
Changji Hui Autonomous Prefecture	2004	0.00403947	0.000826164	0.00060126	0.0345573	0.0397013	0.0381647	0.0578749	0.0356864	0.0518299	0.00140564	0.000246138	1.33108e-05	0.00875085	0.0169901	0.0192846	0.00695584		0.316928	0.316928
Changji Hui Autonomous Prefecture	2005	0.00356143	0.00150281	0.00071457	0.0338322	0.037946	0.0379213	0.0594932	0.038144	0.0544924	0.00280948	0.000204078	7.15807e-06	0.00930135	0.0171276	0.0197996	0.00753749		0.324395	0.324395
Changji Hui Autonomous Prefecture	2006	0.0055127	0.0298837	0.00386714	0.0337638	0.0403395	0.0380024	0.059504	0.0341242	0.0544189	0.00415033	0.000189786	1.72294e-05	0.00909436	0.0184432	0.0200967	0.00861711		0.360025	0.360025
Changji Hui Autonomous Prefecture	2007	0.0078442	0.013086	0.00344056	0.032343	0.0385843	0.0371896	0.0586886	0.0396536	0.053499	0.00676795	0.000245267	5.97563e-07	0.0112479	0.0210102	0.0218559	0.0108295		0.356286	0.356286
Changji Hui Autonomous Prefecture	2008	0.00958762	0.00851838	0.00321382	0.0328616	0.04018	0.0376812	0.0558597	0.0461835	0.0503872	0.00752609	0.00161237	0	0.0151455	0.0219073	0.024261	0.0123529		0.367278	0.367278
Changji Hui Autonomous Prefecture	2009	0.00861932	0.0138298	0.00432102	0.032792	0.0406587	0.0389975	0.053325	0.0465872	0.047503	0.00403839	0.00071361	4.81733e-07	0.0162862	0.0215846	0.0409643	0.0150986		0.38532	0.38532
Changji Hui Autonomous Prefecture	2010	0.00864867	0.0200586	0.00405181	0.0342771	0.0406587	0.0386684	0.0500488	0.0465872	0.0441179	0.00292117	0.000474677	2.38698e-05	0.0171141	0.0204568	0.0444995	0.0155708		0.388178	0.388178
Changji Hui Autonomous Prefecture	2011	0.0119986	0.0230956	0.00407023	0.034744	0.0449671	0.0390357	0.0462512	0.0410754	0.0398665	0.0022515	0.000527982	6.28133e-05	0.0187833	0.0231539	0.04083	0.0169412		0.387655	0.387655
Changji Hui Autonomous Prefecture	2012	0.0121771	0.0259931	0.00710754	0.0347489	0.0459245	0.039533	0.047506	0.0471314	0.0405726	0.00188574	0.000509689	0.000188845	0.0208444	0.0233408	0.0418118	0.0194212		0.408697	0.408697
Changji Hui Autonomous Prefecture	2013	0.0123128	0.0300054	0.00568304	0.0345221	0.0475202	0.0418879	0.0412748	0.0471314	0.0305458	0.00120732	0.000468587	0.000146163	0.0205933	0.0238638	0.0436742	0.0233045		0.404141	0.404141
Changji Hui Autonomous Prefecture	2014	0.0119289	0.0171931	0.00472354	0.034371	0.0519882	0.0396228	0.0384879	0.0471841	0.0257392	0.000958804	0.000558878	0.00013053	0.0203379	0.0224605	0.0452108	0.0279859		0.388882	0.388882
Changji Hui Autonomous Prefecture	2015	0.0137127	0.0195881	0.00379198	0.0339053	0.0532648	0.0407438	0.0379874	0.0473771	0.0234449	0.000900756	0.000311114	0.000191547	0.0209897	0.02406	0.0465198	0.0326701		0.399459	0.399459
Changji Hui Autonomous Prefecture	2016	0.0121856	0.0236279	0.0039684	0.0336407	0.0562966	0.0408361	0.0388907	0.0447968	0.0237829	0.000784233	0.000165105	0.000226707	0.0178836	0.0224105	0.0338384	0.0374441		0.390778	0.390778
Changji Hui Autonomous Prefecture	2017	0.012605	0.035666	0.00460765	0.0333932	0.0601264	0.0400548	0.0394276	0.0483075	0.0250658	0.000419641	6.58964e-05	0.000260166	0.0186832	0.0221417	0.0771532	0.0408477		0.458825	0.458825
Changji Hui Autonomous Prefecture	2018	0.0127603	0.02985	0.00373096	0.0331237	0.0618816	0.0373805	0.0409002	0.0465521	0.0276636	0.000505033	1.18016e-05	0.000367213	0.0201012	0.0224776	0.082768	0.0388632		0.458937	0.458937
prefectures and cities directly under Ili Kazak Autonomous Prefecture	2000	0.00280342	0.00496369	0.0010565	0.0318626	0.0220048	0.0347418	0.064286	0.0535736	0.0598737	0.00415025	1.24277e-05	0.000664594	0.00233855	0.0122668	0.0129875	0.00272377		0.31031	0.31031
prefectures and cities directly under Ili Kazak Autonomous Prefecture	2001	0.00370692	0.00243623	0.000904597	0.028522	0.0308451	0.0348328	0.0623745	0.0341066	0.057685	0.0016263	7.62222e-05	0.000911068	0.00361572	0	0.0136221	0.00245526		0.277721	0.277721
Counties (Cities) Direct Under Ili Prefecture	2002	0.00405658	0.00207743	0.00110016	0.0302209	0.0329355	0.0360131	0.0619091	0.0481495	0.0571869	0.00242295	0	0.000595133	0.00440845	0.010714	0.0145551	0.00285921		0.309204	0.309204
Counties (Cities) Direct Under Ili Prefecture	2003	0.00395022	0.00355388	0.00149802	0.0296316	0.0368769	0.0363577	0.0630309	0.0488516	0.0584686	0.00682114	1.69158e-05	0.000467593	0.00465508	0.0112965	0.0150732	0.0024577		0.323007	0.323007
Counties (Cities) Direct Under Ili Prefecture	2004	0.00390009	0.0035239	0.00156773	0.0293866	0.0408183	0.035956	0.0625269	0.0488516	0.0577818	0.00676942	0.000515372	0.000978197	0.00469912	0.0115848	0.0159477	0.00307624		0.327884	0.327884
Counties (Cities) Direct Under Ili Prefecture	2005	0.00424853	0.00657779	0.00174703	0.0303659	0.0452862	0.0309685	0.0606742	0.0479564	0.0557667	0.0105433	0.000385532	0.00194915	0.0047828	0.0120765	0.0166196	0.00314724		0.333095	0.333095
Counties (Cities) Direct Under Ili Prefecture	2006	0.0041226	0.00325013	0.00164935	0.0305329	0.0478394	0.0304821	0.0582609	0.0484655	0.053029	0.010475	0.00013448	0.00075697	0.0053333	0.0121133	0.0175026	0.00353164		0.327479	0.327479
Counties (Cities) Direct Under Ili Prefecture	2007	0.00396244	0.00338588	0.00157209	0.0300143	0.0481585	0.0299053	0.058419	0.0494836	0.0528747	0.00967317	8.85954e-05	0.000573075	0.00626696	0.0117879	0.0192916	0.00385414		0.329311	0.329311
Counties (Cities) Direct Under Ili Prefecture	2008	0.00551392	0.00335222	0.00171727	0.0298306	0.0510308	0.0297032	0.0591391	0.0453585	0.0535244	0.0175855	0.000194465	0.000904357	0.0070685	0.0120186	0.0202963	0.00431819		0.341556	0.341556
Counties (Cities) Direct Under Ili Prefecture	2009	0.00782586	0.00761932	0.00276918	0.0294442	0.0495947	0.029505	0.0579372	0.0469734	0.0517445	0.00880657	0.000645752	0.000981153	0.00867157	0.0124638	0.015488	0.00516784		0.335638	0.335638
Counties (Cities) Direct Under Ili Prefecture	2010	0.0094947	0.00552784	0.00249251	0.0294434	0.0495947	0.0302487	0.0560675	0.0470612	0.0494676	0.00939635	0.00155114	0.00345386	0.0117808	0.0123149	0.0157247	0.00539098		0.339011	0.339011
Counties (Cities) Direct Under Ili Prefecture	2011	0.00722678	0.00538281	0.00273516	0.0305591	0.0508712	0.0289637	0.0568055	0.0474474	0.050224	0.00844442	0.00033232	0.0103828	0.010856	0.0111725	0.0299778	0.00588188		0.357263	0.357263
Counties (Cities) Direct Under Ili Prefecture	2012	0.00784664	0.00895711	0.00289168	0.0306247	0.0503925	0.028807	0.056731	0.047816	0.0501932	0.00724046	0.000324115	0.0100657	0.0129567	0.0110614	0.030485	0.00683		0.363223	0.363223
Counties (Cities) Direct Under Ili Prefecture	2013	0.00870001	0.0175171	0.00419812	0.0309445	0.0503925	0.0291945	0.0520348	0.0506948	0.0448041	0.00791909	0.000261117	0.0101912	0.0136922	0.0109562	0.0304432	0.00749217		0.369436	0.369436
Counties (Cities) Direct Under Ili Prefecture	2014	0.00817797	0.00889362	0.00346218	0.030805	0.0500734	0.0318783	0.0513194	0.0508352	0.0433616	0.00759429	0.000107303	0.00966632	0.0142295	0.0107144	0.0303691	0.00855203		0.36004	0.36004
Counties (Cities) Direct Under Ili Prefecture	2015	0.00922451	0.0116207	0.00286809	0.0303175	0.0511904	0.0331929	0.0583769	0.0445159	0.0521499	0.0041924	0.000284575	0.0107444	0.0159515	0.0107885	0.0306031	0.00941727		0.375439	0.375439
Counties (Cities) Direct Under Ili Prefecture	2016	0.00914015	0.015603	0.0036377	0.0328015	0.0502329	0.0330397	0.0583344	0.0442702	0.0519111	0.00444771	0.0011259	0.014801	0.0117462	0.010914	0.0199667	0.0115633		0.373535	0.373535
Counties (Cities) Direct Under Ili Prefecture	2017	0.0103346	0.00838789	0.00354412	0.0302479	0.0569349	0.0322507	0.058578	0.0421286	0.0520679	0.00453277	0.00189577	0.0162075	0.012692	0.0121388	0.0693111	0.0125669		0.42382	0.42382
Counties (Cities) Direct Under Ili Prefecture	2018	0.0116367	0.00863648	0.00332639	0.0303088	0.0582115	0.0277611	0.0596512	0.0431994	0.0531881	0.00434885	0.000304694	0.0304647	0.0134905	0.0129415	0.0831477	0.0131186		0.453736	0.453736
Tarbagatai Administrative Offices	2000	0.000969521	0.000268056	0.000434986	0.0313522	0.0288823	0.0405172	0.0671887	0.0351774	0.0632353	0.00246584	1.56502e-05	2.60732e-05	0.00401209	0.0132194	0.0219951	0.00347744		0.313237	0.313237
Tarbagatai Administrative Offices	2001	0.000531831	0.00024267	0.000320499	0.0323511	0.0288983	0.0421539	0.0672801	0.0349843	0.063302	0.00221801	0	5.75834e-05	0.00343956	0.012902	0.0450819	0.003813		0.337577	0.337577
Tarbagatai Administrative Offices	2002	0.000782463	0.000104568	0.000270821	0.0327827	0.0292015	0.0423406	0.0664073	0.0332289	0.062305	0.00178733	0	3.4689e-05	0.00396805	0.0135188	0.0254971	0.00416944		0.316399	0.316399
Tarbagatai Administrative Offices	2003	0.000864378	0.000116945	0.000138757	0.0343338	0.0291855	0.0427983	0.0661301	0.038495	0.0620664	0.005856	0	1.11366e-05	0.00327221	0.0136961	0.0174114	0.00249565		0.316872	0.316872
Tarbagatai Administrative Offices	2004	0.000210287	0.000156279	0.000137402	0.0301271	0.0291696	0.0438848	0.0659878	0.0386706	0.0618246	0.00347661	0	0.000139703	0.00427193	0.0138828	0.0174071	0.0025371		0.311884	0.311884
Tarbagatai Administrative Offices	2005	0.000377783	0.000793423	0.000467001	0.0288486	0.0227867	0.0445776	0.0667275	0.038495	0.062547	0.00417077	0	0.000353371	0.00421027	0.0141194	0.0159424	0.0032926		0.30771	0.30771
Tarbagatai Administrative Offices	2006	5.13492e-05	0.000134098	0.000149119	0.03235	0.0250207	0.0434504	0.0664803	0.0310523	0.0622439	0.00304233	6.39234e-05	0.000507223	0.00547864	0.0139604	0.0163138	0.00361038		0.303909	0.303909
Tarbagatai Administrative Offices	2007	0	0.000264913	0.000275882	0.0322303	0.0296483	0.044418	0.0664813	0.0413036	0.0621639	0.00350427	8.85701e-06	6.81182e-05	0.00592785	0.014062	0.0147472	0.00392861		0.319033	0.319033
Tarbagatai Administrative Offices	2008	0.000132041	0.000766884	0.000219061	0.0302674	0.034595	0.0433952	0.0672052	0.0454989	0.0629122	0.0031061	1.1367e-05	0.000138902	0.00697601	0.0135624	0.0151479	0.0043214		0.328256	0.328256
Tarbagatai Administrative Offices	2009	0.000612522	0.00993941	0.00358949	0.0307655	0.0302866	0.0427756	0.0678114	0.046008	0.0637029	0.00232827	4.25335e-05	0.000113911	0.00725787	0.0131583	0.0301426	0.00520419		0.353739	0.353739
Tarbagatai Administrative Offices	2010	0.000717666	0.00671456	0.00273319	0.0343582	0.0291696	0.0407646	0.0660317	0.0462537	0.0615755	0.00149505	0	0.000488395	0.00555351	0.012592	0.0305246	0.00507041		0.344043	0.344043
Tarbagatai Administrative Offices	2011	0.000897388	0.00698115	0.00338951	0.0345524	0.0322014	0.0415813	0.0656736	0.0471489	0.0612714	0.000961514	0	0.000440526	0.0085923	0.0125184	0.0321924	0.00599955		0.354402	0.354402
Tarbagatai Administrative Offices	2012	0.000747008	0.00128479	0.00107112	0.0337718	0.0320419	0.0403626	0.0650243	0.0475351	0.0605365	0.00067322	0.000138761	0.000407752	0.0102394	0.0124337	0.0328842	0.00683411		0.345986	0.345986
Tarbagatai Administrative Offices	2013	0.000838703	0.00214337	0.00120682	0.0335711	0.0328397	0.0425377	0.065301	0.0503261	0.0608615	0.00158499	6.99312e-05	0.000501855	0.0110145	0.0117933	0.0335734	0.00806899		0.356233	0.356233
Tarbagatai Administrative Offices	2014	0.00112357	0.00397314	0.00130645	0.0334178	0.0325206	0.0409882	0.0650513	0.0498522	0.0606449	0.00105132	0.0001087	0.000455463	0.0127321	0.0113223	0.0342537	0.00944514		0.358247	0.358247
Tarbagatai Administrative Offices	2015	0.0011737	0.00330244	0.00140262	0.0328049	0.0306057	0.0432484	0.0672229	0.0519937	0.0631514	0.000467026	3.32465e-07	0.000593183	0.0148064	0.0118895	0.0355483	0.0125744		0.370785	0.370785
Tarbagatai Administrative Offices	2016	0.00112112	0.00276445	0.00131153	0.0334013	0.026776	0.044152	0.0673353	0.0495099	0.0635477	0.000775687	0.0014745	0.000792533	0.0129073	0.0116635	0.0221087	0.0149593		0.354601	0.354601
Tarbagatai Administrative Offices	2017	0.000956072	0.00231058	0.00126752	0.0329469	0.0336376	0.0436459	0.0667483	0.0470261	0.063067	0.00110078	0	0.000891701	0.013325	0.0111195	0.0757226	0.0165131		0.410279	0.410279
Tarbagatai Administrative Offices	2018	0.00112601	0.00301213	0.00133018	0.0332594	0.027893	0.0418383	0.0672285	0.048268	0.0634649	0.000709876	0.00011925	0.00135157	0.0154979	0.0116073	0.0907294	0.0160442		0.42348	0.42348
Altay Administrative Offices	2000	0.000405903	0.000794845	0.000617527	0.0269085	0.0283239	0.0446513	0.0662514	0.0381966	0.0617685	0.00279849	2.49656e-05	0.000600803	0.00801977	0.0134424	0.0222381	0.00396714		0.31901	0.31901
Altay Administrative Offices	2001	0.000326434	0.000341464	0	0.0285149	0.0296962	0.0438313	0.066634	0.0388461	0.0621553	0.00177291	0	0.000431932	0.00700684	0.0130162	0.0261934	0.00423849		0.323005	0.323005
Altay Administrative Offices	2002	0.000524495	0.000458537	0.000117521	0.0287485	0.0320099	0.0436018	0.066927	0.0402504	0.0625583	0.00171635	0.000243637	0.000943222	0.00564159	0.0138524	0.0226369	0.00461708		0.324848	0.324848
Altay Administrative Offices	2003	0.000548947	0.000483986	0.000170001	0.0301851	0.0348184	0.0419974	0.067812	0.0406015	0.06362	0.00710396	0	0.000599879	0.00427193	0.0137201	0.0251962	0.00586983		0.336999	0.336999
Altay Administrative Offices	2004	0.00068221	0.000888108	0.000407036	0.0289444	0.0376268	0.0387034	0.0683175	0.0414791	0.0642027	0.00240847	0	0.000831438	0.00580894	0.013897	0.0259334	0.00561511		0.335746	0.335746
Altay Administrative Offices	2005	1.58938e-05	0.00415646	0.00108403	0.0299425	0.0385843	0.0401369	0.0674476	0.0414791	0.063055	0.000708138	0	0.00134895	0.00367738	0.0129022	0.0273228	0.0065261		0.338387	0.338387
Altay Administrative Offices	2006	0.00018828	0.000509547	0.00030858	0.0289929	0.049116	0.0333636	0.0679701	0.0394956	0.0635598	0.000334363	0	0.000826547	0.00479601	0.0126362	0.0319203	0.00645802		0.340476	0.340476
Altay Administrative Offices	2007	0.000273862	0.000153029	4.9513e-05	0.0270743	0.0531052	0.0316397	0.0669631	0.0376349	0.0623394	0.000474494	0	0.000657722	0.00548745	0.0116979	0.0302628	0.00681403		0.334628	0.334628
Altay Administrative Offices	2008	0.00016016	0.000224798	9.25789e-05	0.0264358	0.0545414	0.0299962	0.0666395	0.041602	0.0619904	0.00191267	0.00196298	0.000415412	0.00648276	0.0109811	0.031404	0.00713319		0.341975	0.341975
Altay Administrative Offices	2009	0.000748231	0.00232963	0.0020667	0.0262803	0.0505521	0.0356808	0.0662649	0.040777	0.0615227	0.00315167	3.59354e-05	0.000355009	0.00795371	0.0101063	0.0264144	0.00845348		0.342693	0.342693
Altay Administrative Offices	2010	0.00147445	0.00117381	0.00130695	0.0286659	0.0532648	0.0353294	0.0655324	0.0442526	0.060637	0.00399394	0.00321654	0.00171985	0.0104288	0.0102823	0.0276333	0.00900829		0.35792	0.35792
Altay Administrative Offices	2011	0.00235228	0.00112927	0.00152673	0.0278086	0.0562966	0.0340998	0.0645138	0.058629	0.0593355	0.00393078	0.000553911	0.00231788	0.0101425	0.010093	0.0419613	0.00947337		0.384164	0.384164
Altay Administrative Offices	2012	0.00259313	0.00209932	0.00192756	0.0282697	0.0564562	0.032648	0.0676035	0.0102864	0.062835	0.00353862	0.000675369	0.00316694	0.0121728	0.0109869	0.0432162	0.0107174		0.349193	0.349193
Altay Administrative Offices	2013	0.00240118	0.00258812	0.00164132	0.0288971	0.0569349	0.0361434	0.0667881	0.00660015	0.0627087	0.00377799	0.000658565	0.00494589	0.0135645	0.0105197	0.0437359	0.0121426		0.354048	0.354048
Altay Administrative Offices	2014	0.00204541	0.00284421	0.0017417	0.0292212	0.0574136	0.0376974	0.0633128	0.0442877	0.0595486	0.00489443	0.000693188	0.00460457	0.0142471	0.00978541	0.0430994	0.0137872		0.389224	0.389224
Altay Administrative Offices	2015	0.00185591	0.00372084	0.00189673	0.0290784	0.0547009	0.0407394	0.0660377	0.0446212	0.0627095	0.002817	0.000629484	0.00604433	0.0177659	0.0101146	0.0431282	0.0166619		0.402522	0.402522
Altay Administrative Offices	2016	0.000952405	0.00465359	0.00164935	0.0295663	0.0519882	0.0419108	0.0644235	0.0454901	0.0611127	0.00336516	0	0.00735735	0.0118062	0.00938694	0.0312187	0.0210064		0.385888	0.385888
Altay Administrative Offices	2017	0.000869268	0.00205358	0.0014191	0.0289976	0.0601264	0.0419968	0.0631737	0.046359	0.0597747	0.00345574	0	0.0081658	0.012803	0.0093278	0.0808019	0.0212116		0.440536	0.440536
Altay Administrative Offices	2018	0.000970744	0.00290057	0.00146405	0.0313561	0.0593285	0.0420067	0.0630251	0.0459246	0.0596121	0.00257755	0	0.00238623	0.0128271	0.00987826	0.090218	0.0209419		0.445417	0.445417
Bortala Mongolian Autonomous Prefecture	2000	0.000294646	0.00181351	0.000735493	0.0325176	0.0203453	0.0458757	0.065824	0.026032	0.0616627	0.0186606	0.000105177	8.46579e-05	0.00586179	0.0131845	0.0110691	0.00330033		0.307367	0.307367
Bortala Mongolian Autonomous Prefecture	2001	0.00036678	0.00348364	0.000929973	0.0324082	0.024925	0.0462646	0.0660333	0.028665	0.061961	0.0159678	0	3.80757e-05	0.00599391	0.0149958	0.0126767	0.00376784		0.318478	0.318478
Bortala Mongolian Autonomous Prefecture	2002	0.000876604	0.00308293	0.00108456	0.0309997	0.0271749	0.046137	0.0658868	0.0360375	0.061801	0.0265802	0	5.46251e-05	0.00687472	0.0157598	0.012031	0.00427818		0.33866	0.33866
Bortala Mongolian Autonomous Prefecture	2003	0.000356999	0.00613686	0.00125625	0.0322261	0.0253	0.0467284	0.0664949	0.0393727	0.0624702	0.032863	7.78943e-06	2.46876e-06	0.00659727	0.0140933	0.0129067	0.0034359		0.350249	0.350249
Bortala Mongolian Autonomous Prefecture	2004	2.4452e-05	0.00497748	0.00103109	0.0326682	0.023425	0.0464087	0.0652357	0.0414791	0.0608757	0.0419991	0	8.09628e-05	0.0084822	0.0133475	0.014094	0.00391691		0.358046	0.358046
Bortala Mongolian Autonomous Prefecture	2005	7.45785e-05	0.00263797	0.00125157	0.0326232	0.0389034	0.0369216	0.0661474	0.0425323	0.0619035	0.0295999	4.20984e-05	7.51077e-05	0.00767185	0.0145982	0.0146531	0.00345686		0.353093	0.353093
Bortala Mongolian Autonomous Prefecture	2006	6.84655e-05	0.00401781	0.00174298	0.0329572	0.0400204	0.0376648	0.0677503	0.0393551	0.0638779	0.0233761	0	0.000163675	0.00954798	0.0146087	0.0157534	0.0034782		0.354383	0.354383
Bortala Mongolian Autonomous Prefecture	2007	0.000176054	0.005529	0.00413045	0.0325452	0.0371481	0.038195	0.0671896	0.0323864	0.0631772	0.0196057	0	7.2216e-05	0.00857028	0.0142862	0.0176537	0.00368175		0.344347	0.344347
Bortala Mongolian Autonomous Prefecture	2008	0.000666316	0.000848313	0.00113993	0.0321865	0.0417757	0.0374384	0.0664017	0.0373189	0.0621849	0.0201	0.00136371	0.000134614	0.00952156	0.014318	0.0184699	0.00430185		0.34817	0.34817
Bortala Mongolian Autonomous Prefecture	2009	0.000693214	0.000986518	0.00360355	0.0323774	0.04018	0.0380956	0.0650312	0.0401451	0.0606063	0.00861121	0.000247486	0.000112297	0.00949513	0.0139863	0.017416	0.00494589		0.336533	0.336533
Bortala Mongolian Autonomous Prefecture	2010	0.00070544	0.000880396	0.00365824	0.0331073	0.0282122	0.0399344	0.0646302	0.0377227	0.0600826	0.00364643	0	0.00133325	0.0120098	0.0127447	0.0209351	0.00435358		0.323956	0.323956
Bortala Mongolian Autonomous Prefecture	2011	0.000537944	0.000485888	0.00392686	0.0330921	0.0328397	0.0388976	0.0655269	0.0374418	0.0611592	0.00797807	0	0.001598	0.0135425	0.0116957	0.031512	0.00496059		0.345195	0.345195
Bortala Mongolian Autonomous Prefecture	2012	0.00061619	0.00057453	0.00286928	0.0329982	0.039063	0.0384733	0.0661612	0.0287177	0.0617285	0.00970885	0	0.00144806	0.0147624	0.0121635	0.0323341	0.00572649		0.347345	0.347345
Bortala Mongolian Autonomous Prefecture	2013	0.000176054	0.00237671	0.00294079	0.0332262	0.0449671	0.0385063	0.0650102	0.0330007	0.0603698	0.00873137	0	0.00120399	0.0157445	0.0111173	0.0318726	0.00689018		0.356134	0.356134
Bortala Mongolian Autonomous Prefecture	2014	2.20068e-05	0.00263807	0.00315017	0.0332411	0.0499138	0.023346	0.0655918	0.0321231	0.0610746	0.00603862	8.28989e-06	0.00116302	0.0169864	0.0101986	0.031728	0.00792884		0.345152	0.345152
Bortala Mongolian Autonomous Prefecture	2015	0.000138154	0.00238564	0.00335132	0.0325797	0.0529457	0.0217761	0.0674546	0.0419355	0.0634361	0.00547111	0	0.0015434	0.0170965	0.0104355	0.0330855	0.00936282		0.362998	0.362998
Bortala Mongolian Autonomous Prefecture	2016	0.000332547	0.00248396	0.00273445	0.0177268	0.0527861	0.0186421	0.0672013	0.0379684	0.0630317	0.00298585	0.000179561	0.00195169	0.0121546	0.0111169	0.0252924	0.0112986		0.327887	0.327887
Bortala Mongolian Autonomous Prefecture	2017	0.000328879	0.000607637	0.00273207	0.0323484	0.0588498	0.0182503	0.0669598	0.04341	0.0627477	0.0035781	0	0.00229178	0.0152417	0.0107286	0.0676501	0.0127287		0.398454	0.398454
Bortala Mongolian Autonomous Prefecture	2018	0.000514714	0.00102743	0.00271416	0.0324404	0.0566158	0.0182641	0.067463	0.0413327	0.0633359	0.00317371	0	0.000248587	0.0133917	0.0113206	0.0725557	0.0139748		0.398373	0.398373
Bayangol Mongolian Autonomous Prefecture	2000	0.00104043	0.0004238	0.000779826	0.0300806	0.060254	0.0269268	0.0609408	0.0367046	0.0580213	0.000409813	0	0.000328533	0.0107503	0.0130726	0.0095873	0.00625119		0.315572	0.315572
Bayangol Mongolian Autonomous Prefecture	2001	0.000836258	0.000346318	0.000571945	0.031134	0.059887	0.0281767	0.0542755	0.0376173	0.0529715	0.000322764	0.00012053	8.64073e-05	0.010486	0.0137539	0.0149802	0.00665391		0.31222	0.31222
Bayangol Mongolian Autonomous Prefecture	2002	0.00150502	0.00233965	0.000866341	0.0309353	0.0597913	0.0296811	0.0584565	0.0402504	0.0562572	0.000289444	0.000243166	9.03154e-05	0.00832806	0.0152414	0.0190389	0.00708491		0.330399	0.330399
Bayangol Mongolian Autonomous Prefecture	2003	0.00138765	0.0121246	0.00216383	0.0311907	0.0599588	0.0293705	0.05564	0.0423568	0.0512461	0.000174707	0.000455034	7.7668e-05	0.00944228	0.0148659	0.0215412	0.00560087		0.337597	0.337597
Bayangol Mongolian Autonomous Prefecture	2004	0.00183757	0.000708664	0.000928691	0.0307612	0.0601264	0.0292577	0.0559921	0.0470963	0.0537799	0.000169702	0.00013764	0.000210209	0.00954358	0.0149356	0.0238518	0.0074736		0.336811	0.336811
Bayangol Mongolian Autonomous Prefecture	2005	0.00176788	0.000354182	0.000935656	0.0312592	0.0639561	0.0283009	0.0587512	0.0477984	0.0563417	7.74679e-05	1.43374e-05	0.000163673	0.0103055	0.0166019	0.0256086	0.00462007		0.346857	0.346857
Bayangol Mongolian Autonomous Prefecture	2006	0.00122138	0.000958522	0.00111362	0.0313551	0.0663496	0.0269055	0.0580959	0.0446563	0.0555591	0.000204372	0.000189761	0.000116663	0.0108824	0.015641	0.0282941	0.00372483		0.345268	0.345268
Bayangol Mongolian Autonomous Prefecture	2007	0.00148179	0.000455914	0.0012962	0.0318766	0.0647539	0.0282396	0.0591887	0.045477	0.0564464	0.000457856	3.33739e-06	0.000142461	0.0130888	0.0164305	0.0316421	0.00409198		0.355073	0.355073
Bayangol Mongolian Autonomous Prefecture	2008	0.00239874	0.0298412	0.00729394	0.0319128	0.0685836	0.0274882	0.0580381	0.0459004	0.0558836	0.000625913	0	9.04173e-05	0.0134015	0.0164928	0.0326394	0.00406908		0.39466	0.39466
Bayangol Mongolian Autonomous Prefecture	2009	0.00373749	0.0256775	0.0051103	0.0328349	0.0626795	0.0160502	0.0568596	0.0463239	0.0541487	0.000179008	0	9.73835e-05	0.0145906	0.0163262	0.0236903	0.00527461		0.36358	0.36358
Bayangol Mongolian Autonomous Prefecture	2010	0.00563863	0.0313771	0.00740849	0.0327457	0.0612433	0.031936	0.0555533	0.0416722	0.0529836	0.0001461	0.000295378	0.000169528	0.016753	0.0176558	0.0248877	0.00539584		0.385862	0.385862
Bayangol Mongolian Autonomous Prefecture	2011	0.00572054	0.0311662	0.00836121	0.0330986	0.0622008	0.0278802	0.0555282	0.0405312	0.0527542	0.000152419	0.000315811	0.000222372	0.0158854	0.0157622	0.0379886	0.00547847		0.393046	0.393046
Bayangol Mongolian Autonomous Prefecture	2012	0.00595283	0.0196471	0.00971924	0.032995	0.0609242	0.0311536	0.0555953	0.0411017	0.0524329	0.000132573	0.000314776	0.000411004	0.0161541	0.0157964	0.0405129	0.00630308		0.389147	0.389147
Bayangol Mongolian Autonomous Prefecture	2013	0.00723534	0.022567	0.00715401	0.0329859	0.0604455	0.0327901	0.0536291	0.0387583	0.0495308	0.000132365	0.000304828	0.000319007	0.0174665	0.0166486	0.042803	0.00632786		0.389098	0.389098
Bayangol Mongolian Autonomous Prefecture	2014	0.0069627	0.0138184	0.00765837	0.0330164	0.0618816	0.0329977	0.0563991	0.0400924	0.0525387	0.000137988	0.000255672	0.000208716	0.0186247	0.0163938	0.0443758	0.00653342		0.391896	0.391896
Bayangol Mongolian Autonomous Prefecture	2015	0.00621203	0.015273	0.00817792	0.0326561	0.0602859	0.0299741	0.0588547	0.0394254	0.0552832	0.000254745	0.000259746	0.000265016	0.0190519	0.0158703	0.0451666	0.00868043		0.395691	0.395691
Bayangol Mongolian Autonomous Prefecture	2016	0.00536843	0.0179885	0.00680949	0.0226376	0.0531052	0.0342058	0.0595818	0.0397589	0.0554195	0.000332959	0	0.000362958	0.0181854	0.0185904	0.0455494	0.0114548		0.389351	0.389351
Bayangol Mongolian Autonomous Prefecture	2017	0.00738328	0.0212472	0.00511213	0.0325729	0.0590094	0.0353605	0.0585413	0.0395921	0.0535086	0.000299543	0.000297304	0.000464131	0.0209512	0.0210363	0.0850016	0.0124695		0.452847	0.452847
Bayangol Mongolian Autonomous Prefecture	2018	0.00797379	0.0180014	0.00543073	0.0325359	0.0641156	0.0338067	0.058307	0.0396755	0.0534809	0.000166884	0	3.93076e-05	0.0237818	0.0224184	0.0932229	0.0135089		0.466466	0.466466
Aksu Administrative Offices	2000	0.00154047	0.0017332	0.000831559	0.0254133	0.0146327	0.035928	0.065864	0.0421111	0.0623957	1.04989e-05	0.000140144	2.73141e-05	0.00321936	0.010781	0.00865965	0.00166929		0.274957	0.274957
Aksu Administrative Offices	2001	0.00224102	0.00109026	0.000534952	0.0280766	0.0203932	0.0361502	0.0645496	0.0439366	0.0615246	8.47168e-05	0	0.000331325	0.00352764	0.0124443	0.0215045	0.0018611		0.298251	0.298251
Aksu Administrative Offices	2002	0.00162239	0.00131833	0.000795677	0.0259127	0.0222761	0.0371603	0.0616759	0.0428834	0.0591399	0	1.34478e-05	0.000248806	0.00330744	0.0121853	0.00878244	0.00206531		0.279387	0.279387
Aksu Administrative Offices	2003	0.00184979	0.00156738	0.000900338	0.0288406	0.0250846	0.0360135	0.0618239	0.0444632	0.059142	6.87685e-06	0.00132524	9.88507e-05	0.00334267	0.0130379	0.010177	0.00219949		0.289873	0.289873
Aksu Administrative Offices	2004	0.00255156	0.00094623	0.000947645	0.029952	0.027893	0.037812	0.0606877	0.0458675	0.0578183	2.85759e-05	0.000546162	0.000713885	0.00320615	0.0142507	0.0113822	0.00304415		0.297648	0.297648
Aksu Administrative Offices	2005	0.00165051	0.000688396	0.00146597	0.0296406	0.0250207	0.038877	0.0522016	0.0467452	0.0504367	0.000115066	0	0.000441348	0.00310045	0.0145827	0.0116198	0.00361018		0.280196	0.280196
Aksu Administrative Offices	2006	0.00191092	0.00289953	0.00221528	0.029962	0.026776	0.0385374	0.0496374	0.0477458	0.048075	9.65077e-05	4.55991e-05	0.000102271	0.00421027	0.0145827	0.0114739	0.00350114		0.281772	0.281772
Aksu Administrative Offices	2007	0.000638197	0.00643807	0.00120174	0.0284046	0.0296483	0.0379207	0.0481546	0.0462186	0.0464718	9.89159e-05	0	3.67447e-05	0.0070729	0.0149924	0.0116585	0.00386511		0.282821	0.282821
Aksu Administrative Offices	2008	0.00161628	0.00224776	0.00159657	0.0271895	0.033478	0.0415308	0.0515184	0.0508176	0.0494555	0.000245621	9.09984e-05	5.18672e-05	0.00681307	0.0143841	0.0120099	0.00459001		0.297636	0.297636
Aksu Administrative Offices	2009	0.00429499	0.0120636	0.00262445	0.0281944	0.0336376	0.038508	0.0503089	0.0514145	0.0479645	0.000343734	0	4.12149e-05	0.00854386	0.0132205	0.0290486	0.0050879		0.325297	0.325297
Aksu Administrative Offices	2010	0.0053342	0.00900943	0.00201507	0.0293143	0.0326801	0.0372793	0.0492832	0.0502735	0.0470886	0.00051781	0	0.00030298	0.0102218	0.0122217	0.0288537	0.00438495		0.318781	0.318781
Aksu Administrative Offices	2011	0.00405536	0.00861054	0.00187946	0.0280565	0.0373077	0.0372021	0.0451199	0.0484479	0.0434926	0.000474879	0.000118406	0.000193569	0.0113492	0.0114955	0.031599	0.00495335		0.314356	0.314356
Aksu Administrative Offices	2012	0.00449672	0.00458154	0.00210894	0.0282917	0.0382651	0.0380598	0.045703	0.0491325	0.0435627	0.000660277	0.000477129	0.000191331	0.0120891	0.0112681	0.0318246	0.00563191		0.316344	0.316344
Aksu Administrative Offices	2013	0.00658247	0.00561003	0.00215173	0.0288392	0.0374673	0.0396715	0.0450057	0.0354231	0.0420019	0.000604671	0.00048216	0.000140217	0.0136349	0.0115718	0.0314949	0.00684246		0.307524	0.307524
Aksu Administrative Offices	2014	0.00382551	0.0121296	0.00234372	0.0290734	0.041297	0.0387257	0.0447644	0.038969	0.0408043	0.000534121	0.000429954	6.23297e-05	0.0134984	0.0101769	0.0306296	0.00764599		0.31491	0.31491
Aksu Administrative Offices	2015	0.00394044	0.00969365	0.00252109	0.0294411	0.0416161	0.0393549	0.0511655	0.0371961	0.0483531	0.000248474	6.96149e-05	5.91035e-05	0.0141018	0.0106301	0.0150302	0.00798516		0.311406	0.311406
Aksu Administrative Offices	2016	0.00436468	0.00833937	0.00219102	0.0217636	0.041297	0.0389537	0.0544609	0.0405225	0.0519692	0.000148483	0.000268554	7.16084e-05	0.0124538	0.0110458	0.0190363	0.00972594		0.316612	0.316612
Aksu Administrative Offices	2017	0.00729769	0.0032503	0.0014359	0.0287089	0.0489564	0.0371025	0.0540567	0.0438489	0.0513462	0.000265808	0	7.22645e-05	0.014616	0.0129462	0.0866192	0.0104105		0.400933	0.400933
Aksu Administrative Offices	2018	0.0106867	0.00359864	0.00167116	0.028695	0.047999	0.0364856	0.054326	0.0421857	0.0516326	0.000212681	0	6.49262e-05	0.0148221	0.0149591	0.0956088	0.0104937		0.413442	0.413442
Kizilsu Kirgiz Autonomous Prefecture	2000	0.000306872	0	0	0.0187193	0.0228825	0.0426103	0.0657086	0.0146046	0.061798	0.00344489	0	1.77823e-05	0.0048929	0.0105797	0.0104553	0.000677238		0.256698	0.256698
Kizilsu Kirgiz Autonomous Prefecture	2001	0.000361889	0	0	0.0284291	0.0348982	0.0429886	0.0698753	0.0102337	0.0663558	0.00178333	0	0.00526882	0.00436441	0.0129293	0.0109692	0.000721195		0.289179	0.289179
Kizilsu Kirgiz Autonomous Prefecture	2002	0.000552615	0	0	0.0132084	0.036462	0.0423229	0.0695813	0.0177818	0.0659861	0.00104458	0	0.00467605	0.00317532	0.0141595	0.0169998	0.00080438		0.286755	0.286755
Kizilsu Kirgiz Autonomous Prefecture	2003	0.000643087	0	0	0.0222473	0.038321	0.0433417	0.0698528	0.0181329	0.0663291	0.00170614	0	0.000809491	0.00384474	0.0157732	0.0143817	0.000895706		0.296279	0.296279
Kizilsu Kirgiz Autonomous Prefecture	2004	0.000658981	0	0	0.0222931	0.04018	0.0441045	0.0686985	0.0193616	0.0649022	0.00378695	1.82897e-05	0.000203699	0.00323257	0.0163441	0.0160393	0.00126175		0.301086	0.301086
Kizilsu Kirgiz Autonomous Prefecture	2005	0.000292201	0	0	0.0223863	0.0400204	0.0442611	0.071402	0.0235745	0.0680995	0.0045409	0	0.000985512	0.00328983	0.0165575	0.0168545	0.000995513		0.31326	0.31326
Kizilsu Kirgiz Autonomous Prefecture	2006	0.000215177	0	0	0.0215129	0.0448075	0.0446417	0.0712772	0.0254352	0.0679583	0.00552333	0	0.00245812	0.00471233	0.0173688	0.0162929	0.00116431		0.323368	0.323368
Kizilsu Kirgiz Autonomous Prefecture	2007	0.000206619	0.000237293	0	0.0205225	0.0478394	0.0400908	0.0711952	0.0235745	0.0677922	0.0117432	0.000370657	0.00200884	0.00780838	0.0152967	0.0166305	0.00129568		0.326612	0.326612
Kizilsu Kirgiz Autonomous Prefecture	2008	0.000140599	0.000345647	0.000120876	0.0200107	0.0502329	0.0437506	0.0709916	0.0272081	0.0674123	0.0101939	0.013999	0.00395534	0.0090239	0.0114357	0.0171356	0.00151526		0.347472	0.347472
Kizilsu Kirgiz Autonomous Prefecture	2009	4.8904e-05	0.0136241	0.0017929	0.0190161	0.0518287	0.0414975	0.0706422	0.029332	0.0672458	0.00365766	0.000766338	0.00321786	0.011565	0.0115024	0.0384764	0.00164998		0.365864	0.365864
Kizilsu Kirgiz Autonomous Prefecture	2010	0.000198061	0.00903355	0.00140981	0.0170208	0.0561371	0.0403417	0.0671651	0.021626	0.0635834	0.00207479	0.00241535	0.0138248	0.0132342	0.0109902	0.0381449	0.00190486		0.359105	0.359105
Kizilsu Kirgiz Autonomous Prefecture	2011	9.53627e-05	0.00938121	0.00173098	0.01789	0.0582115	0.0397912	0.0655226	0.0223457	0.0620364	0.00242467	0.00140761	0.0045668	0.0146038	0.00948827	0.0412316	0.00204005		0.352768	0.352768
Kizilsu Kirgiz Autonomous Prefecture	2012	0.00033377	0.00629164	0.00146562	0.015238	0.0609242	0.0397769	0.0649914	0.021626	0.0604852	0.00312689	1.80156e-05	0.00387484	0.0148505	0.0100007	0.0436443	0.00232704		0.348975	0.348975
Kizilsu Kirgiz Autonomous Prefecture	2013	0.000556283	0.00532194	0.0009947	0.018127	0.0628391	0.0370349	0.0634804	0.0333167	0.0587537	0.00398672	0	0.00402798	0.0134324	0.0107343	0.0436239	0.00260451		0.358835	0.358835
Kizilsu Kirgiz Autonomous Prefecture	2014	0.000826477	0.00345713	0.000666518	0.0204961	0.0647539	0.0360524	0.0661122	0.0308943	0.062021	0.00433405	0.000999371	0.00240075	0.0137274	0.0113931	0.0422497	0.00305564		0.36344	0.36344
Kizilsu Kirgiz Autonomous Prefecture	2015	0.000718888	0.00338643	0.000365639	0.0198184	0.0655518	0.0365532	0.0677221	0.0328515	0.0628653	0.00203503	0.00056187	0.00221498	0.0157489	0.0103989	0.041013	0.00355078		0.365357	0.365357
Kizilsu Kirgiz Autonomous Prefecture	2016	0.000369225	0.00367741	0.000534816	0.031134	0.0642752	0.036955	0.0669827	0.0348088	0.0610598	0.0023407	0.000150903	0.00254684	0.0189909	0.0105178	0.0194958	0.00428325		0.358123	0.358123
Kizilsu Kirgiz Autonomous Prefecture	2017	0.000877826	0.00262394	0.000337557	0.0202573	0.0693815	0.0311004	0.0667866	0.0362652	0.0616666	0.00262492	1.35211e-05	0.00221181	0.0171891	0.0115906	0.098373	0.00418874		0.425488	0.425488
Kizilsu Kirgiz Autonomous Prefecture	2018	0.000528163	0.00256701	0.000410166	0.0235002	0.0689028	0.0304558	0.068659	0.0381204	0.0642045	0.000962429	1.30071e-05	0.000358659	0.0178281	0.0119982	0.110362	0.00439107		0.443261	0.443261
Kashgar Administrative Offices	2000	0.00290367	1.26806e-05	0	0.0213114	0.00164358	0.0386697	0.069327	0.0151136	0.0660247	0.000814	2.60647e-05	0.00799304	4.84445e-05	0.0097761	0.0316704	0.000594364		0.265929	0.265929
Kashgar Administrative Offices	2001	0.00288044	3.40508e-05	1.83861e-05	0.0175369	0.00457969	0.0394493	0.069955	0.0312981	0.0665507	0.00024422	7.13781e-05	0.0045079	0.000136526	0.0113004	0.00697389	0.000663231		0.2562	0.2562
Kashgar Administrative Offices	2002	0.00542956	3.04434e-05	1.57594e-05	0.0169432	0.00689347	0.0384635	0.0693086	0.0297182	0.0658661	0.000151077	2.12721e-05	0.00302039	4.84445e-05	0.0129189	0.00663732	0.000732117		0.256198	0.256198
Kashgar Administrative Offices	2003	0.00673774	0.000193735	0.000211763	0.0184648	0.012287	0.0383926	0.0692846	0.0363886	0.065754	0.000297172	9.97206e-05	0.00222534	0	0.0143313	0.00848216	0.00100608		0.274157	0.274157
Kashgar Administrative Offices	2004	0.00586481	0.000402273	0.00019632	0.0187359	0.0176805	0.0376035	0.0691482	0.0222931	0.0655069	0.000523093	0.00014141	0.00624299	0.000387556	0.0149926	0.00889781	0.00126497		0.269882	0.269882
Kashgar Administrative Offices	2005	0.00440625	0.000300293	0.000218166	0.0191763	0.0187177	0.0370412	0.0685742	0.0225037	0.0648303	0.000765689	7.62771e-06	0.00157977	0.00053289	0.0145747	0.00881208	0.00160101		0.263642	0.263642
Kashgar Administrative Offices	2006	0.00481337	0.00027004	8.92661e-05	0.0192279	0.0197549	0.0371483	0.0688272	0.0225037	0.0651395	0.00273935	4.30495e-05	0.00245848	0.000748688	0.0164668	0.0091225	0.00201135		0.271364	0.271364
Kashgar Administrative Offices	2007	0.00497965	0.00424401	0.000547975	0.0219232	0.0207921	0.0375669	0.0686021	0.0225037	0.0648744	0.00536073	0.000160723	0.00243379	0.00311807	0.0175592	0.00927379	0.00258132		0.286522	0.286522
Kashgar Administrative Offices	2008	0.00549803	0.00278558	0.00104985	0.0208723	0.0218293	0.0377007	0.0687011	0.026857	0.0649731	0.00643123	0	0.00155091	0.00362453	0.0159291	0.0112037	0.00297002		0.291976	0.291976
Kashgar Administrative Offices	2009	0.0113457	0.0125571	0.000420436	0.0221195	0.023425	0.0372186	0.0686838	0.0344577	0.0649965	0.00244135	0	0.00129599	0.00535973	0.015617	0.0120652	0.00370339		0.315707	0.315707
Kashgar Administrative Offices	2010	0.0116281	0.00955345	0.000930191	0.0210447	0.0208719	0.0399246	0.0692733	0.0342646	0.0656887	0.00195007	5.5088e-05	0.00273309	0.00785682	0.0146414	0.0296117	0.00327148		0.333299	0.333299
Kashgar Administrative Offices	2011	0.00844938	0.0102221	0.000961578	0.0241793	0.0309249	0.0385823	0.068993	0.0298411	0.0653806	0.00179555	0	0.00254673	0.00928374	0.0126123	0.035703	0.00428787		0.343763	0.343763
Kashgar Administrative Offices	2012	0.0119729	0.00693738	0.000602138	0.0252069	0.0341163	0.0381968	0.0691133	0.0322108	0.0654772	0.00153148	0.00013138	0.00179958	0.00929695	0.0135195	0.0389385	0.00502492		0.354076	0.354076
Kashgar Administrative Offices	2013	0.0129828	0.00603084	0.000694761	0.0270236	0.0387438	0.0383022	0.069258	0.0276908	0.0655892	0.00233849	4.51343e-05	0.000947418	0.00997517	0.0140321	0.0389817	0.00625154		0.358888	0.358888
Kashgar Administrative Offices	2014	0.0124424	0.00545946	0.000661545	0.0274705	0.0403395	0.0378011	0.0699779	0.0231707	0.066411	0.00198542	4.42218e-05	0.000271364	0.00993994	0.013488	0.038348	0.00623863		0.35405	0.35405
Kashgar Administrative Offices	2015	0.0113286	0.00498981	0.00063124	0.0270023	0.0417757	0.0392708	0.0695013	0.0234691	0.0659174	0.00145679	0.000127406	0.000282927	0.0124679	0.013029	0.0393773	0.0067822		0.35741	0.35741
Kashgar Administrative Offices	2016	0.0113347	0.00529966	0.000612568	0.034371	0.0336376	0.0418177	0.0698159	0.0260144	0.0663345	0.00290165	0	0.000347506	0.0144294	0.0138654	0.0387062	0.00820701		0.367695	0.367695
Kashgar Administrative Offices	2017	0.0203538	0.00448248	0.000637499	0.0262147	0.037946	0.0411547	0.0698347	0.0247418	0.0663676	0.00292467	2.04455e-06	0.00054018	0.0153165	0.0168167	0.11098	0.00830008		0.446613	0.446613
Kashgar Administrative Offices	2018	0.019498	0.00444346	0.000603586	0.0263025	0.0377864	0.0411333	0.0699631	0.0253781	0.0664889	0.00141097	2.17775e-05	4.63287e-05	0.0153666	0.0181937	0.112752	0.00895812		0.448347	0.448347
Hotan Administrative Offices	2000	0.00163828	0.000518557	5.27013e-05	0.00957141	0	0.0405944	0.067136	0.0295427	0.0635721	0.00124735	0	0.000412398	0.000885214	0.00866412	0	3.02075e-05		0.223865	0.223865
Hotan Administrative Offices	2001	0.00154537	0.000571945	0.000131145	0.00139321	0.00328716	0.0428598	0.0686109	0.0295427	0.0650276	0.00126687	0	0.000779093	0.000929255	0.0096352	0.0104741	3.84615e-06		0.236058	0.236058
Hotan Administrative Offices	2002	0.00185346	0.000334421	9.04705e-06	0	0.00630305	0.0431666	0.0689418	0.0251543	0.0652475	0.000526812	0	0.000586516	0.00128158	0.0100518	0.000401277	6.24985e-06		0.223864	0.223864
Hotan Administrative Offices	2003	0.00263226	0.00106441	0.000193481	0.00658747	0.0105556	0.0413769	0.069363	0.0156754	0.0657685	8.24788e-06	0	0.000161587	0.00187172	0.00943213	0.00580837	0		0.230499	0.230499
Hotan Administrative Offices	2004	0.00401624	0.000261822	9.29079e-06	0.00780398	0.0148082	0.0402492	0.0691699	0.0172201	0.0655555	0.000209389	0	0.00180461	0.00138728	0.0108707	0.005975	0.000843499		0.240185	0.240185
Hotan Administrative Offices	2005	0.0020992	0.0014649	4.3413e-05	0.010036	0.0160848	0.0384954	0.0694823	0.0177467	0.0659074	8.04958e-05	0	0.00444779	0.00202146	0.0103033	0.00664071	0.000452167		0.245306	0.245306
Hotan Administrative Offices	2006	0.00200262	0.00198266	0.000171669	0.0109364	0.0239037	0.0376041	0.0694107	0.0205553	0.0657968	4.51748e-05	0	0.00123844	0.00321496	0.00997183	0.00696271	0.00071655		0.254514	0.254514
Hotan Administrative Offices	2007	0.0017202	0.0933585	0.00208603	0.0115225	0.0242229	0.037281	0.0687863	0.0183435	0.0650921	7.61447e-05	0	0.00126628	0.00209633	0.0106046	0.00702917	0.000893245		0.344379	0.344379
Hotan Administrative Offices	2008	0.00248799	0.00184236	0.000265346	0.0137045	0.0261377	0.0363867	0.0691142	0.018835	0.0654093	0.00056451	0	0.00135881	0.0049986	0.0114726	0.00759932	0.00102755		0.261205	0.261205
Hotan Administrative Offices	2009	0.00315553	0.00324609	0.000561387	0.0149973	0.0309249	0.0365857	0.0690005	0.0189228	0.0650791	4.12942e-06	0	0.00110246	0.00963606	0.011248	0.0201312	0.00108123		0.285676	0.285676
Hotan Administrative Offices	2010	0.00486594	0.00291106	0.000492274	0.0170156	0.0322014	0.0366196	0.0693114	0.0167461	0.0654351	5.22165e-05	0	0.00178254	0.0120319	0.0102175	0.0214547	0.00112421		0.292262	0.292262
Hotan Administrative Offices	2011	0.00441114	0.00248071	0.000416592	0.0198884	0.0369886	0.0384567	0.0698232	0.015886	0.0659872	2.38359e-05	3.62391e-05	0.00240656	0.0127277	0.00911916	0.0390748	0.0011657		0.318893	0.318893
Hotan Administrative Offices	2012	0.0115206	0.00223226	0.000355218	0.0204191	0.0387438	0.0378008	0.0700791	0.0140604	0.0661633	3.41259e-05	0	0.00182321	0.0140797	0.0109188	0.0393119	0.0012905		0.328833	0.328833
Hotan Administrative Offices	2013	0.0126319	0.0019138	0.000238724	0.0221015	0.0389034	0.0382163	0.0693239	0.0124806	0.0652493	5.08569e-05	0	0.000543833	0.0151543	0.0110031	0.0392079	0.00138241		0.328402	0.328402
Hotan Administrative Offices	2014	0.00849951	0.00143013	0.000193863	0.0224663	0.0411374	0.0346268	0.0697354	0.0124806	0.0657859	3.60553e-05	0	0.000169242	0.0149253	0.00869799	0.0373192	0.00149727		0.319001	0.319001
Hotan Administrative Offices	2015	0.0103848	0.00125473	0.000151426	0.0231177	0.0454458	0.0345194	0.0697597	0.00911031	0.0649075	2.80944e-05	0.000939046	0.000161406	0.0157048	0.00835369	0.0353455	0.00154676		0.320731	0.320731
Hotan Administrative Offices	2016	0.00950204	0.00128452	0.000306422	0.0296247	0.0444884	0.0341725	0.0692112	0	0.0655177	5.8809e-05	7.42957e-05	0.000199463	0.0277773	0.00789677	0.00972105	0.00176828		0.301603	0.301603
Hotan Administrative Offices	2017	0.0132187	0.000658672	6.87078e-05	0.0230748	0.0526265	0.0335957	0.0696093	0.00724963	0.0659531	2.69311e-05	0	0.000227471	0.0192078	0.0094105	0.0899194	0.00188185		0.386729	0.386729
Hotan Administrative Offices	2018	0.0140795	0.00066694	0.000136552	0.0232081	0.0523074	0.0327739	0.0692771	0.00362482	0.0655666	8.17349e-05	0	3.68301e-05	0.0198755	0.0104135	0.0967993	0.0018495		0.390697	0.390697

## Sheet: results
id	year	environmental regulation composite index
Urumqi City	2000	0.385446
Urumqi City	2001	0.399018
Urumqi City	2002	0.438602
Urumqi City	2003	0.451281
Urumqi City	2004	0.470792
Urumqi City	2005	0.466821
Urumqi City	2006	0.468332
Urumqi City	2007	0.485781
Urumqi City	2008	0.515799
Urumqi City	2009	0.588845
Urumqi City	2010	0.594324
Urumqi City	2011	0.599078
Urumqi City	2012	0.617302
Urumqi City	2013	0.638859
Urumqi City	2014	0.646311
Urumqi City	2015	0.653265
Urumqi City	2016	0.673363
Urumqi City	2017	0.716157
Urumqi City	2018	0.72903
Karamay City	2000	0.422277
Karamay City	2001	0.43623
Karamay City	2002	0.399708
Karamay City	2003	0.425006
Karamay City	2004	0.4468
Karamay City	2005	0.453711
Karamay City	2006	0.452795
Karamay City	2007	0.459416
Karamay City	2008	0.432981
Karamay City	2009	0.500719
Karamay City	2010	0.454185
Karamay City	2011	0.458429
Karamay City	2012	0.471484
Karamay City	2013	0.443504
Karamay City	2014	0.456719
Karamay City	2015	0.489392
Karamay City	2016	0.448845
Karamay City	2017	0.466077
Karamay City	2018	0.469893
Turpan City	2000	0.308457
Turpan City	2001	0.319539
Turpan City	2002	0.343141
Turpan City	2003	0.346202
Turpan City	2004	0.344145
Turpan City	2005	0.33991
Turpan City	2006	0.31318
Turpan City	2007	0.325135
Turpan City	2008	0.315245
Turpan City	2009	0.386287
Turpan City	2010	0.356585
Turpan City	2011	0.346087
Turpan City	2012	0.365636
Turpan City	2013	0.38693
Turpan City	2014	0.389242
Turpan City	2015	0.409927
Turpan City	2016	0.38694
Turpan City	2017	0.410881
Turpan City	2018	0.416085
Hami City	2000	0.320243
Hami City	2001	0.336956
Hami City	2002	0.331283
Hami City	2003	0.332561
Hami City	2004	0.33818
Hami City	2005	0.33347
Hami City	2006	0.341822
Hami City	2007	0.351729
Hami City	2008	0.351502
Hami City	2009	0.357244
Hami City	2010	0.362971
Hami City	2011	0.378083
Hami City	2012	0.372132
Hami City	2013	0.341672
Hami City	2014	0.292867
Hami City	2015	0.338079
Hami City	2016	0.329532
Hami City	2017	0.381798
Hami City	2018	0.367913
Changji Hui Autonomous Prefecture	2000	0.29063
Changji Hui Autonomous Prefecture	2001	0.28282
Changji Hui Autonomous Prefecture	2002	0.301979
Changji Hui Autonomous Prefecture	2003	0.313182
Changji Hui Autonomous Prefecture	2004	0.316928
Changji Hui Autonomous Prefecture	2005	0.324395
Changji Hui Autonomous Prefecture	2006	0.360025
Changji Hui Autonomous Prefecture	2007	0.356286
Changji Hui Autonomous Prefecture	2008	0.367278
Changji Hui Autonomous Prefecture	2009	0.38532
Changji Hui Autonomous Prefecture	2010	0.388178
Changji Hui Autonomous Prefecture	2011	0.387655
Changji Hui Autonomous Prefecture	2012	0.408697
Changji Hui Autonomous Prefecture	2013	0.404141
Changji Hui Autonomous Prefecture	2014	0.388882
Changji Hui Autonomous Prefecture	2015	0.399459
Changji Hui Autonomous Prefecture	2016	0.390778
Changji Hui Autonomous Prefecture	2017	0.458825
Changji Hui Autonomous Prefecture	2018	0.458937
Counties (Cities) Direct Under Ili Prefecture	2000	0.31031
Counties (Cities) Direct Under Ili Prefecture	2001	0.277721
Counties (Cities) Direct Under Ili Prefecture	2002	0.309204
Counties (Cities) Direct Under Ili Prefecture	2003	0.323007
Counties (Cities) Direct Under Ili Prefecture	2004	0.327884
Counties (Cities) Direct Under Ili Prefecture	2005	0.333095
Counties (Cities) Direct Under Ili Prefecture	2006	0.327479
Counties (Cities) Direct Under Ili Prefecture	2007	0.329311
Counties (Cities) Direct Under Ili Prefecture	2008	0.341556
Counties (Cities) Direct Under Ili Prefecture	2009	0.335638
Counties (Cities) Direct Under Ili Prefecture	2010	0.339011
Counties (Cities) Direct Under Ili Prefecture	2011	0.357263
Counties (Cities) Direct Under Ili Prefecture	2012	0.363223
Counties (Cities) Direct Under Ili Prefecture	2013	0.369436
Counties (Cities) Direct Under Ili Prefecture	2014	0.36004
Counties (Cities) Direct Under Ili Prefecture	2015	0.375439
Counties (Cities) Direct Under Ili Prefecture	2016	0.373535
Counties (Cities) Direct Under Ili Prefecture	2017	0.42382
Counties (Cities) Direct Under Ili Prefecture	2018	0.453736
Tarbagatai Administrative Offices	2000	0.313237
Tarbagatai Administrative Offices	2001	0.337577
Tarbagatai Administrative Offices	2002	0.316399
Tarbagatai Administrative Offices	2003	0.316872
Tarbagatai Administrative Offices	2004	0.311884
Tarbagatai Administrative Offices	2005	0.30771
Tarbagatai Administrative Offices	2006	0.303909
Tarbagatai Administrative Offices	2007	0.319033
Tarbagatai Administrative Offices	2008	0.328256
Tarbagatai Administrative Offices	2009	0.353739
Tarbagatai Administrative Offices	2010	0.344043
Tarbagatai Administrative Offices	2011	0.354402
Tarbagatai Administrative Offices	2012	0.345986
Tarbagatai Administrative Offices	2013	0.356233
Tarbagatai Administrative Offices	2014	0.358247
Tarbagatai Administrative Offices	2015	0.370785
Tarbagatai Administrative Offices	2016	0.354601
Tarbagatai Administrative Offices	2017	0.410279
Tarbagatai Administrative Offices	2018	0.42348
Altay Administrative Offices	2000	0.31901
Altay Administrative Offices	2001	0.323005
Altay Administrative Offices	2002	0.324848
Altay Administrative Offices	2003	0.336999
Altay Administrative Offices	2004	0.335746
Altay Administrative Offices	2005	0.338387
Altay Administrative Offices	2006	0.340476
Altay Administrative Offices	2007	0.334628
Altay Administrative Offices	2008	0.341975
Altay Administrative Offices	2009	0.342693
Altay Administrative Offices	2010	0.35792
Altay Administrative Offices	2011	0.384164
Altay Administrative Offices	2012	0.349193
Altay Administrative Offices	2013	0.354048
Altay Administrative Offices	2014	0.389224
Altay Administrative Offices	2015	0.402522
Altay Administrative Offices	2016	0.385888
Altay Administrative Offices	2017	0.440536
Altay Administrative Offices	2018	0.445417
Bortala Mongolian Autonomous Prefecture	2000	0.307367
Bortala Mongolian Autonomous Prefecture	2001	0.318478
Bortala Mongolian Autonomous Prefecture	2002	0.33866
Bortala Mongolian Autonomous Prefecture	2003	0.350249
Bortala Mongolian Autonomous Prefecture	2004	0.358046
Bortala Mongolian Autonomous Prefecture	2005	0.353093
Bortala Mongolian Autonomous Prefecture	2006	0.354383
Bortala Mongolian Autonomous Prefecture	2007	0.344347
Bortala Mongolian Autonomous Prefecture	2008	0.34817
Bortala Mongolian Autonomous Prefecture	2009	0.336533
Bortala Mongolian Autonomous Prefecture	2010	0.323956
Bortala Mongolian Autonomous Prefecture	2011	0.345195
Bortala Mongolian Autonomous Prefecture	2012	0.347345
Bortala Mongolian Autonomous Prefecture	2013	0.356134
Bortala Mongolian Autonomous Prefecture	2014	0.345152
Bortala Mongolian Autonomous Prefecture	2015	0.362998
Bortala Mongolian Autonomous Prefecture	2016	0.327887
Bortala Mongolian Autonomous Prefecture	2017	0.398454
Bortala Mongolian Autonomous Prefecture	2018	0.398373
Bayangol Mongolian Autonomous Prefecture	2000	0.315572
Bayangol Mongolian Autonomous Prefecture	2001	0.31222
Bayangol Mongolian Autonomous Prefecture	2002	0.330399
Bayangol Mongolian Autonomous Prefecture	2003	0.337597
Bayangol Mongolian Autonomous Prefecture	2004	0.336811
Bayangol Mongolian Autonomous Prefecture	2005	0.346857
Bayangol Mongolian Autonomous Prefecture	2006	0.345268
Bayangol Mongolian Autonomous Prefecture	2007	0.355073
Bayangol Mongolian Autonomous Prefecture	2008	0.39466
Bayangol Mongolian Autonomous Prefecture	2009	0.36358
Bayangol Mongolian Autonomous Prefecture	2010	0.385862
Bayangol Mongolian Autonomous Prefecture	2011	0.393046
Bayangol Mongolian Autonomous Prefecture	2012	0.389147
Bayangol Mongolian Autonomous Prefecture	2013	0.389098
Bayangol Mongolian Autonomous Prefecture	2014	0.391896
Bayangol Mongolian Autonomous Prefecture	2015	0.395691
Bayangol Mongolian Autonomous Prefecture	2016	0.389351
Bayangol Mongolian Autonomous Prefecture	2017	0.452847
Bayangol Mongolian Autonomous Prefecture	2018	0.466466
Aksu Administrative Offices	2000	0.274957
Aksu Administrative Offices	2001	0.298251
Aksu Administrative Offices	2002	0.279387
Aksu Administrative Offices	2003	0.289873
Aksu Administrative Offices	2004	0.297648
Aksu Administrative Offices	2005	0.280196
Aksu Administrative Offices	2006	0.281772
Aksu Administrative Offices	2007	0.282821
Aksu Administrative Offices	2008	0.297636
Aksu Administrative Offices	2009	0.325297
Aksu Administrative Offices	2010	0.318781
Aksu Administrative Offices	2011	0.314356
Aksu Administrative Offices	2012	0.316344
Aksu Administrative Offices	2013	0.307524
Aksu Administrative Offices	2014	0.31491
Aksu Administrative Offices	2015	0.311406
Aksu Administrative Offices	2016	0.316612
Aksu Administrative Offices	2017	0.400933
Aksu Administrative Offices	2018	0.413442
Kizilsu Kirgiz Autonomous Prefecture	2000	0.256698
Kizilsu Kirgiz Autonomous Prefecture	2001	0.289179
Kizilsu Kirgiz Autonomous Prefecture	2002	0.286755
Kizilsu Kirgiz Autonomous Prefecture	2003	0.296279
Kizilsu Kirgiz Autonomous Prefecture	2004	0.301086
Kizilsu Kirgiz Autonomous Prefecture	2005	0.31326
Kizilsu Kirgiz Autonomous Prefecture	2006	0.323368
Kizilsu Kirgiz Autonomous Prefecture	2007	0.326612
Kizilsu Kirgiz Autonomous Prefecture	2008	0.347472
Kizilsu Kirgiz Autonomous Prefecture	2009	0.365864
Kizilsu Kirgiz Autonomous Prefecture	2010	0.359105
Kizilsu Kirgiz Autonomous Prefecture	2011	0.352768
Kizilsu Kirgiz Autonomous Prefecture	2012	0.348975
Kizilsu Kirgiz Autonomous Prefecture	2013	0.358835
Kizilsu Kirgiz Autonomous Prefecture	2014	0.36344
Kizilsu Kirgiz Autonomous Prefecture	2015	0.365357
Kizilsu Kirgiz Autonomous Prefecture	2016	0.358123
Kizilsu Kirgiz Autonomous Prefecture	2017	0.425488
Kizilsu Kirgiz Autonomous Prefecture	2018	0.443261
Kashgar Administrative Offices	2000	0.265929
Kashgar Administrative Offices	2001	0.2562
Kashgar Administrative Offices	2002	0.256198
Kashgar Administrative Offices	2003	0.274157
Kashgar Administrative Offices	2004	0.269882
Kashgar Administrative Offices	2005	0.263642
Kashgar Administrative Offices	2006	0.271364
Kashgar Administrative Offices	2007	0.286522
Kashgar Administrative Offices	2008	0.291976
Kashgar Administrative Offices	2009	0.315707
Kashgar Administrative Offices	2010	0.333299
Kashgar Administrative Offices	2011	0.343763
Kashgar Administrative Offices	2012	0.354076
Kashgar Administrative Offices	2013	0.358888
Kashgar Administrative Offices	2014	0.35405
Kashgar Administrative Offices	2015	0.35741
Kashgar Administrative Offices	2016	0.367695
Kashgar Administrative Offices	2017	0.446613
Kashgar Administrative Offices	2018	0.448347
Hotan Administrative Offices	2000	0.223865
Hotan Administrative Offices	2001	0.236058
Hotan Administrative Offices	2002	0.223864
Hotan Administrative Offices	2003	0.230499
Hotan Administrative Offices	2004	0.240185
Hotan Administrative Offices	2005	0.245306
Hotan Administrative Offices	2006	0.254514
Hotan Administrative Offices	2007	0.344379
Hotan Administrative Offices	2008	0.261205
Hotan Administrative Offices	2009	0.285676
Hotan Administrative Offices	2010	0.292262
Hotan Administrative Offices	2011	0.318893
Hotan Administrative Offices	2012	0.328833
Hotan Administrative Offices	2013	0.328402
Hotan Administrative Offices	2014	0.319001
Hotan Administrative Offices	2015	0.320731
Hotan Administrative Offices	2016	0.301603
Hotan Administrative Offices	2017	0.386729
Hotan Administrative Offices	2018	0.390697
