# Supplementary material for: Decarbonization, Environmental Regulation, and Economic Boom: An Indicator Assessment Based on the Industrial Waste
Source: Frontiers journal article supplement (doi:10.3389/fenrg.2021.838852), 2022-02-03
Supplement: Data_Sheet_2.ZIP [file Calculation process and result of economic high quality development subsystem index.xlsx]

## Sheet: calculation process
		Innovation development			Coordinated development			Green development			Open development			Shared developmen
wj		0.0853301	0.0933585	0.0871317	0.0347489	0.0877321	0.0467284	0.071402	0.058629	0.0680995	0.0419991	0.013999	0.0304647	0.0534231	0.0466206	0.11502	0.0653132
Grouping the weight		0.321007	0.351209	0.327784	0.205361	0.518483	0.276157	0.360379	0.295911	0.34371	0.485748	0.161908	0.352345	0.19054	0.166278	0.410234	0.232948
Xij
Urumqi City	2000	1.23422	1.23102	1.17653	1.89722	1.97963	1.87218	1.54594	1.23174	1.52792	1.05367	1.04617	1.31319	1.27295	1.36359	1.1775	1.27136
Urumqi City	2001	1.33679	1.17406	1.1285	1.87138	1.98236	1.71251	1.53046	1.37814	1.51067	1.03143	1.04499	1.30606	1.38094	1.59343	1.18347	1.27344
Urumqi City	2002	1.3301	1.22502	1.22492	1.87702	1.97945	1.78207	1.54964	1.43802	1.52411	1.03297	1.0412	1.29276	1.33643	1.60477	1.34742	1.2948
Urumqi City	2003	1.42329	1.2197	1.20643	1.8866	1.97881	1.78125	1.55863	1.3482	1.53849	1.05154	1.01668	1.10945	1.49908	1.65478	1.39159	1.28389
Urumqi City	2004	1.42524	1.23843	1.19365	1.89216	1.97817	1.78872	1.56742	1.39012	1.54691	1.078	1.04118	1.12716	1.59149	1.66931	1.42504	1.33148
Urumqi City	2005	1.44938	1.2099	1.20154	1.83009	1.97817	1.76957	1.57204	1.39311	1.54676	1.09625	1.04164	1.14008	1.43733	1.68551	1.44762	1.36545
Urumqi City	2006	1.5346	1.18463	1.15492	1.87953	1.98181	1.75593	1.58593	1.26766	1.55497	1.08041	1.1084	1.1639	1.57277	1.7218	1.3855	1.40048
Urumqi City	2007	1.56109	1.17819	1.16559	1.91774	1.96908	1.72043	1.61251	1.39521	1.58093	1.09664	1.11473	1.15068	1.59338	1.72655	1.41706	1.39806
Urumqi City	2008	1.66681	1.35609	1.19165	1.91659	1.97272	1.67335	1.6202	1.35778	1.5766	1.0983	1.0158	1.09321	1.55464	1.79515	1.46341	1.43768
Urumqi City	2009	1.90185	1.38108	1.26025	1.92546	1.97817	1.88456	1.65195	1.65808	1.59018	1.06388	1.0996	1.08595	1.62801	1.9646	1.4342	1.51821
Urumqi City	2010	2	1.3683	1.25916	1.9312	1.97817	1.85231	1.65631	1.67455	1.58946	1.0836	1.02882	1.15178	1.46742	2	1.47922	1.49339
Urumqi City	2011	1.90311	1.34643	1.28113	1.93508	1.98181	1.67124	1.65435	1.71647	1.58912	1.09531	1.05058	1.09068	1.68349	1.9193	1.55094	1.55304
Urumqi City	2012	1.88947	1.41687	1.34486	1.94651	1.98181	1.63091	1.69887	1.74042	1.63577	1.09055	1.06268	1.09611	1.6543	1.873	1.56587	1.59669
Urumqi City	2013	1.90807	1.49512	1.3397	1.94316	1.98363	1.63159	1.74414	1.76737	1.68813	1.06055	1.0566	1.09072	1.65257	1.85176	1.58351	1.67669
Urumqi City	2014	1.91239	1.52676	1.30569	1.91574	1.98545	1.62384	1.7508	1.78533	1.70515	1.05708	1.05168	1.05366	1.6947	1.85924	1.59094	1.72954
Urumqi City	2015	1.84083	1.53141	1.29587	1.90184	1.98363	1.65422	1.79327	1.83922	1.76074	1.03816	1.06445	1.06453	1.7116	1.80857	1.60523	1.77281
Urumqi City	2016	1.81159	1.61016	1.3061	1.90428	1.98545	1.61375	1.82456	1.85719	1.79416	1.03653	1.00779	1.15776	1.7113	1.7762	1.58765	1.95658
Urumqi City	2017	1.81379	1.50242	1.25941	1.90679	1.98909	1.60153	1.80975	1.88413	1.77413	1.04648	1.00218	1.16313	1.94789	1.97611	1.86969	2
Urumqi City	2018	1.81235	1.52893	1.27152	1.91204	1.99091	1.62329	1.8168	1.88713	1.77969	1.04572	1.00033	1.06426	2	1.98071	1.95204	1.96401
Karamay City	2000	1.01729	1.74168	1.47847	1.81075	1.99873	1.69035	1.05877	1.39581	1.14281	1.00759	1	1.00132	1.24575	1.35692	1.73348	1.15612
Karamay City	2001	1.0056	1.58357	1.48799	1.7265	2	1.31077	1.06461	1.81826	1.1518	1.00757	1	1.00039	1.23091	1.26842	2	1.12444
Karamay City	2002	1.00851	1.61535	1.47579	1.84457	1.99964	1.59501	1.09085	1.56377	1.16832	1.00668	1	1.00039	1.26965	1.26788	1.59048	1.1396
Karamay City	2003	1.00759	1.36065	1.60769	1.87766	1.99982	1.62093	1.07109	1.6506	1.15523	1.00726	1.0026	1.00022	1.3093	1.32362	1.85089	1.1055
Karamay City	2004	1.00633	1.51371	1.82735	1.88464	2	1.43259	1.02395	1.72545	1.11053	1.00497	1	1.00066	1.41293	1.34147	1.79751	1.08908
Karamay City	2005	1.00788	1.58675	2	1.91777	1.99818	1.19783	1.00879	1.72545	1.09999	1.00454	1.0001	1.00111	1.40617	1.38025	1.76027	1.08195
Karamay City	2006	1.01727	1.49934	1.85399	1.91525	1.99818	1.16648	1.11211	1.82455	1.21267	1.00323	1	1.00059	1.41763	1.45307	1.73237	1.06865
Karamay City	2007	1.03118	1.51757	1.88022	1.91987	1.99636	1.12851	1.17923	1.91497	1.27174	1.00471	1.00005	1.00038	1.29447	1.55612	1.64784	1.077
Karamay City	2008	1.03285	1.38236	1.67483	1.9275	1.99636	1.09473	1.19917	1.8979	1.29285	1.00352	1	1.00033	1.3741	1.57047	1.64539	1.05869
Karamay City	2009	1.03264	1.70166	1.98573	1.92656	1.99272	1.27025	1.12618	1.91317	1.22197	1.00707	1	1.0004	1.35596	1.56928	1.7271	1.1142
Karamay City	2010	1.0257	1.4725	1.91478	1.97149	1.99636	1.20769	1.0574	1.91707	1.143	1.00731	1	1.00059	1.19216	1.55343	1.75509	1.09878
Karamay City	2011	1.02184	1.45084	1.90747	1.97073	1.99454	1.17596	1.03561	1.91737	1.13337	1.01039	1.01367	1.0005	1.3431	1.52459	1.78533	1.10764
Karamay City	2012	1.01894	1.75622	1.5956	1.96777	1.99454	1.12032	1.05546	1.91766	1.14959	1.00509	1.01515	1.00144	1.28169	1.49197	1.92078	1.13101
Karamay City	2013	1.02082	1.42159	1.56923	1.98143	1.99454	1.09359	1.04067	1.91796	1.1394	1.01557	1.0143	1.00176	1.27567	1.50309	1.96862	1.15806
Karamay City	2014	1.02194	1.67664	1.54787	1.96192	1.99454	1	1	1.92126	1.10262	1.01019	1	1.00265	1.30213	1.49464	1.96606	1.17505
Karamay City	2015	1.01984	1.6973	1.52743	1.95897	1.99091	1.21008	1.12972	1.92994	1.21757	1.00255	1	1.00505	1.29595	1.47104	1.96152	1.29617
Karamay City	2016	1.02284	1.48991	1.45254	1.96345	1.98909	1.07163	1.1033	1.92246	1.1853	1.00384	1.28685	1.00604	1.31912	1.49808	1.83946	1.35009
Karamay City	2017	1.02374	1.46577	1.50193	1.96518	1.99272	1.10243	1.17621	1.92156	1.25056	1.00224	1	1.00679	1.35343	1.50269	1.92249	1.29117
Karamay City	2018	1.03764	1.37169	1.45133	1.96799	1.99454	1.10655	1.22417	1.92874	1.28471	1.00266	1	1.00504	1.37407	1.5621	1.9997	1.23733
Turpan City	2000	1.00398	1.02953	1.01137	1.74717	1.77846	1.55087	1.84373	1.56796	1.85021	1.00436	1.00376	1.1457	1.06356	1.25556	1.08064	1.05617
Turpan City	2001	1.00311	1.03	1.01283	1.78815	1.80611	1.55351	1.89222	1.59371	1.89408	1.00159	1	1.12207	1.06933	1.26234	1.07574	1.05433
Turpan City	2002	1.00917	1.03222	1.01956	1.77812	1.80648	1.59964	1.91241	1.81228	1.90979	1.00054	1.01413	1.08772	1.09159	1.27561	1.08825	1.0968
Turpan City	2003	1.0101	1.03092	1.01567	1.81005	1.8032	1.57571	1.92033	1.92605	1.91595	1.0009	1.01241	1.03484	1.10494	1.26565	1.09054	1.05375
Turpan City	2004	1.00506	1.00918	1.00819	1.89276	1.79993	1.55721	1.88329	1.92605	1.88905	1.00122	1	1.14571	1.08821	1.25832	1.09091	1.08108
Turpan City	2005	1.00403	1.00624	1.00716	1.91198	1.8163	1.52234	1.86152	1.93503	1.87049	1.00033	1.03914	1.06896	1.09159	1.24613	1.0913	1.08421
Turpan City	2006	1.00195	1.05827	1.05153	1.90845	1.8363	1.53761	1.84802	1.30359	1.85417	1.00057	1	1.09138	1.08763	1.22892	1.10973	1.08763
Turpan City	2007	1.00221	1.07712	1.09576	1.90392	1.83085	1.56315	1.80668	1.53084	1.79358	1.00063	1.0019	1.16824	1.07675	1.20311	1.10185	1.08514
Turpan City	2008	1.0012	1.11325	1.02358	1.89273	1.8363	1.57633	1.77238	1.52934	1.75196	1.00067	1.00586	1.0538	1.08376	1.19036	1.11222	1.08868
Turpan City	2009	1.01337	1.63834	1.04867	1.87784	1.76719	1.77989	1.75758	1.53009	1.72926	1.00126	1.00285	1.06802	1.07848	1.19354	1.24578	1.13126
Turpan City	2010	1.00914	1.49141	1.05707	1.84043	1.76173	1.79624	1.65338	1.39858	1.60772	1.0009	1	1.22081	1.08928	1.17882	1.2742	1.13627
Turpan City	2011	1.01212	1.50706	1.05726	1.83198	1.78356	1.75267	1.58186	1.26707	1.51818	1.00241	1	1.17735	1.10148	1.17351	1.3609	1.1054
Turpan City	2012	1.01387	1.69494	1.11959	1.84147	1.75264	1.77071	1.56848	1.16407	1.49236	1.00243	1.0088	1.13757	1.12341	1.18236	1.40812	1.11754
Turpan City	2013	1.00926	1.67313	1.15088	1.84708	1.72717	1.7732	1.53999	1.64341	1.45847	1.00604	1.00927	1.05291	1.17872	1.16403	1.39825	1.12695
Turpan City	2014	1.01	1.5598	1.13276	1.8538	1.7108	1.8128	1.60334	1.71078	1.51529	1.00239	1.00021	1.04544	1.20774	1.15783	1.38618	1.15837
Turpan City	2015	1.01241	1.58884	1.10772	1.83642	1.60531	1.99714	1.68123	1.83952	1.60077	1.00341	1.01749	1.05515	1.23552	1.15702	1.33848	1.24602
Turpan City	2016	1.01188	1.45173	1.10534	1.83545	1.5944	1.96137	1.62233	1.85479	1.52204	1.00173	1	1.06461	1.26382	1.17889	1.32092	1.26005
Turpan City	2017	1.00769	1.27516	1.09424	1.83777	1.68352	1.89937	1.5166	1.78503	1.37075	1.0006	1	1.06782	1.32015	1.17761	1.80486	1.26043
Turpan City	2018	1.00969	1.16099	1.07949	1.84369	1.71444	1.8662	1.52841	1.81991	1.36362	1.00186	1.00022	1.0615	1.32045	1.19191	1.91808	1.25491
Hami City	2000	1.00804	1.01105	1.0153	1.63406	1.64714	1.85434	1.79914	1.68144	1.76027	1.02964	1.01606	1.00258	1.19381	1.30494	1.15467	1.0883
Hami City	2001	1.00484	1.02755	1.00658	1.87872	1.68425	1.87628	1.80421	1.6985	1.7587	1.03433	1.00278	1.00553	1.18804	1.28153	1.18238	1.09256
Hami City	2002	1.00954	1.02588	1.00787	1.64919	1.70517	1.89983	1.79383	1.71647	1.74965	1.01858	1.00325	1.00712	1.19958	1.32277	1.15684	1.09745
Hami City	2003	1.01006	1.02325	1.00584	1.70602	1.69343	1.90728	1.78684	1.73443	1.73925	1.02334	1.00157	1.00027	1.17699	1.32151	1.17174	1.09898
Hami City	2004	1.00838	1.01289	1.00642	1.74263	1.6817	1.91213	1.7501	1.78832	1.68909	1.01254	1.01931	1.01429	1.21838	1.37329	1.19957	1.11495
Hami City	2005	1.00324	1.00694	1.00269	1.7713	1.71444	1.83458	1.75293	1.67754	1.69961	1.00881	1.0123	1.06468	1.18243	1.36226	1.23118	1.10665
Hami City	2006	1.00321	1.01289	1.0074	1.79458	1.72899	1.80794	1.73815	1.67665	1.67983	1.01549	1.04228	1.07344	1.19266	1.36465	1.28751	1.12043
Hami City	2007	1.00249	1.01671	1.01149	1.80987	1.72354	1.80955	1.76054	1.76168	1.70532	1.01364	1.00626	1.04641	1.21195	1.35634	1.29069	1.13886
Hami City	2008	1.00221	1.00717	1.01955	1.87737	1.75264	1.51416	1.77026	1.83563	1.71999	1.0095	1.13638	1.03693	1.22654	1.33971	1.3032	1.13976
Hami City	2009	1.00692	1.07266	1.05682	1.87751	1.72354	1.80289	1.72138	1.87156	1.66679	1.00892	1.02721	1.03384	1.222	1.33678	1.21301	1.17713
Hami City	2010	1.00777	1.04679	1.05209	1.87773	1.74354	1.81711	1.72638	1.86377	1.67032	1.00236	1.10439	1.05659	1.24632	1.32202	1.24237	1.18366
Hami City	2011	1.00655	1.04419	1.06195	1.88758	1.76719	1.8015	1.71419	1.90958	1.64695	1.00206	1.06653	1.04422	1.29644	1.29359	1.33811	1.20272
Hami City	2012	1.00685	1.04464	1.04836	1.8865	1.78174	1.7284	1.65928	1.93114	1.59177	1.00166	1.0621	1.04368	1.28812	1.31339	1.34565	1.24112
Hami City	2013	1.01325	1.05646	1.0436	1.90185	1.80175	1.64301	1.44186	1.91826	1.34535	1.00413	1.03459	1.03083	1.29818	1.32367	1.35117	1.27305
Hami City	2014	1.01417	1.03531	1.04101	1.89906	1.83267	1.57645	1.14117	1.84731	1	1.01703	1.02429	1.01439	1.30972	1.31755	1.35334	1.31108
Hami City	2015	1.01575	1.06505	1.03744	1.893	1.8363	1.59703	1.39874	1.77305	1.29613	1.01756	1.05596	1.01679	1.34574	1.32258	1.36224	1.36644
Hami City	2016	1.01374	1.10134	1.04192	1.89648	1.83085	1.56882	1.34418	1.80719	1.23353	1.02476	1.00082	1.02018	1.25744	1.36647	1.31733	1.42588
Hami City	2017	1.0111	1.0617	1.03997	1.89655	1.85813	1.55042	1.44116	1.80269	1.3425	1.00445	1.00132	1.01803	1.26298	1.36825	1.67932	1.42036
Hami City	2018	1.01248	1.07353	1.03932	1.8985	1.86722	1.52964	1.30943	1.80494	1.19925	1.00433	1.00709	1.0008	1.27528	1.35931	1.71713	1.41954
Changji Hui Autonomous Prefecture	2000	1.02765	1.01516	1.0091	1.95493	1.34885	1.81404	1.79637	1.54132	1.75578	1.03722	1.02415	1.00058	1.07015	1.27446	1.18443	1.06878
Changji Hui Autonomous Prefecture	2001	1.01075	1.03318	1.00638	1.95251	1.42015	1.8094	1.81999	1.41407	1.78352	1.01702	1.01435	1.00054	1.07675	1.26158	1.1069	1.0729
Changji Hui Autonomous Prefecture	2002	1.02292	1.01061	1.00749	1.95649	1.42506	1.80399	1.83187	1.55778	1.79889	1.03441	1.00069	1.00047	1.10478	1.3032	1.15033	1.08093
Changji Hui Autonomous Prefecture	2003	1.03463	1.02798	1.01056	1.98038	1.4388	1.83138	1.83798	1.61168	1.79295	1.05591	1.04355	1.00039	1.12415	1.32522	1.13559	1.08003
Changji Hui Autonomous Prefecture	2004	1.04734	1.00885	1.0069	1.99448	1.45253	1.81674	1.81055	1.60868	1.76109	1.03347	1.01758	1.00044	1.1638	1.36443	1.16766	1.1065
Changji Hui Autonomous Prefecture	2005	1.04174	1.0161	1.0082	1.97362	1.43252	1.81153	1.83321	1.6506	1.80019	1.06689	1.01458	1.00023	1.17411	1.36738	1.17214	1.11541
Changji Hui Autonomous Prefecture	2006	1.0646	1.3201	1.04438	1.97165	1.4598	1.81326	1.83337	1.58204	1.79911	1.09882	1.01356	1.00057	1.17023	1.3956	1.17472	1.13194
Changji Hui Autonomous Prefecture	2007	1.09193	1.14017	1.03949	1.93076	1.4398	1.79587	1.82195	1.67635	1.7856	1.16115	1.01752	1.00002	1.21054	1.45066	1.19002	1.16581
Changji Hui Autonomous Prefecture	2008	1.11236	1.09124	1.03688	1.94569	1.45798	1.80639	1.78233	1.78772	1.73991	1.1792	1.11518	1	1.2835	1.46991	1.21093	1.18913
Changji Hui Autonomous Prefecture	2009	1.10101	1.14814	1.04959	1.94368	1.46344	1.83456	1.74683	1.79461	1.69755	1.09615	1.05098	1.00002	1.30485	1.46299	1.35615	1.23117
Changji Hui Autonomous Prefecture	2010	1.10136	1.21486	1.0465	1.98642	1.46344	1.82751	1.70094	1.79461	1.64785	1.06955	1.03391	1.00078	1.32035	1.43879	1.38688	1.2384
Changji Hui Autonomous Prefecture	2011	1.14061	1.24739	1.04671	1.99986	1.51255	1.83538	1.64776	1.7006	1.58542	1.05361	1.03772	1.00206	1.35159	1.49665	1.35498	1.25938
Changji Hui Autonomous Prefecture	2012	1.14271	1.27842	1.08157	2	1.52346	1.84602	1.66533	1.80389	1.59578	1.0449	1.03641	1.0062	1.39018	1.50065	1.36352	1.29735
Changji Hui Autonomous Prefecture	2013	1.1443	1.3214	1.06522	1.99347	1.54165	1.89641	1.57806	1.80389	1.44855	1.02875	1.03347	1.0048	1.38548	1.51187	1.37971	1.35681
Changji Hui Autonomous Prefecture	2014	1.1398	1.18416	1.05421	1.98912	1.59258	1.84794	1.53903	1.80479	1.37796	1.02283	1.03992	1.00428	1.3807	1.48177	1.39307	1.42849
Changji Hui Autonomous Prefecture	2015	1.1607	1.20982	1.04352	1.97572	1.60713	1.87193	1.53202	1.80808	1.34427	1.02145	1.02222	1.00629	1.3929	1.51608	1.40445	1.50021
Changji Hui Autonomous Prefecture	2016	1.14281	1.25309	1.04554	1.96811	1.64169	1.87391	1.54467	1.76407	1.34924	1.01867	1.01179	1.00744	1.33475	1.4807	1.2942	1.5733
Changji Hui Autonomous Prefecture	2017	1.14772	1.38203	1.05288	1.96098	1.68534	1.85718	1.55219	1.82395	1.36808	1.00999	1.00471	1.00854	1.34972	1.47493	1.67078	1.62541
Changji Hui Autonomous Prefecture	2018	1.14954	1.31974	1.04282	1.95323	1.70535	1.79995	1.57282	1.79401	1.40622	1.01202	1.00084	1.01205	1.37626	1.48214	1.7196	1.59503
prefectures and cities directly under Ili Kazak Autonomous Prefecture	2000	1.03285	1.05317	1.01213	1.91694	1.25082	1.74348	1.90034	1.91377	1.87921	1.09882	1.00089	1.02182	1.04377	1.26312	1.11292	1.0417
prefectures and cities directly under Ili Kazak Autonomous Prefecture	2001	1.04344	1.0261	1.01038	1.8208	1.35158	1.74543	1.87357	1.58174	1.84707	1.03872	1.00544	1.02991	1.06768	1	1.11843	1.03759
Counties (Cities) Direct Under Ili Prefecture	2002	1.04754	1.02225	1.01263	1.86969	1.37541	1.77069	1.86705	1.82126	1.83976	1.05769	1	1.01954	1.08252	1.22981	1.12654	1.04378
Counties (Cities) Direct Under Ili Prefecture	2003	1.04629	1.03807	1.01719	1.85273	1.42033	1.77806	1.88276	1.83323	1.85858	1.16241	1.00121	1.01535	1.08714	1.24231	1.13105	1.03763
Counties (Cities) Direct Under Ili Prefecture	2004	1.04571	1.03775	1.01799	1.84568	1.46526	1.76947	1.8757	1.83323	1.84849	1.16118	1.03681	1.03211	1.08796	1.24849	1.13865	1.0471
Counties (Cities) Direct Under Ili Prefecture	2005	1.04979	1.07046	1.02005	1.87386	1.51619	1.66274	1.84975	1.81796	1.8189	1.25104	1.02754	1.06398	1.08953	1.25904	1.14449	1.04819
Counties (Cities) Direct Under Ili Prefecture	2006	1.04831	1.03481	1.01893	1.87867	1.54529	1.65233	1.81596	1.82665	1.7787	1.24941	1.00961	1.02485	1.09983	1.25983	1.15217	1.05407
Counties (Cities) Direct Under Ili Prefecture	2007	1.04644	1.03627	1.01804	1.86375	1.54893	1.63998	1.81817	1.84401	1.77643	1.23032	1.00633	1.01881	1.11731	1.25285	1.16772	1.05901
Counties (Cities) Direct Under Ili Prefecture	2008	1.06462	1.03591	1.01971	1.85846	1.58167	1.63566	1.82825	1.77365	1.78597	1.41871	1.01389	1.02969	1.13231	1.2578	1.17646	1.06612
Counties (Cities) Direct Under Ili Prefecture	2009	1.09171	1.08161	1.03178	1.84734	1.5653	1.63141	1.81142	1.8012	1.75984	1.20968	1.04613	1.03221	1.16232	1.26735	1.13465	1.07912
Counties (Cities) Direct Under Ili Prefecture	2010	1.11127	1.05921	1.02861	1.84732	1.5653	1.64733	1.78524	1.80269	1.7264	1.22373	1.1108	1.11337	1.22052	1.26415	1.13671	1.08254
Counties (Cities) Direct Under Ili Prefecture	2011	1.08469	1.05766	1.03139	1.87943	1.57985	1.61983	1.79557	1.80928	1.73751	1.20106	1.02374	1.34082	1.20321	1.23965	1.26063	1.09006
Counties (Cities) Direct Under Ili Prefecture	2012	1.09196	1.09594	1.03319	1.88131	1.57439	1.61648	1.79453	1.81557	1.73706	1.1724	1.02315	1.3304	1.24253	1.23726	1.26504	1.10457
Counties (Cities) Direct Under Ili Prefecture	2013	1.10196	1.18763	1.04818	1.89052	1.57439	1.62477	1.72876	1.86467	1.65792	1.18855	1.01865	1.33452	1.2563	1.23501	1.26468	1.11471
Counties (Cities) Direct Under Ili Prefecture	2014	1.09584	1.09526	1.03974	1.8865	1.57075	1.6822	1.71874	1.86707	1.63674	1.18082	1.00767	1.3173	1.26635	1.22982	1.26403	1.13094
Counties (Cities) Direct Under Ili Prefecture	2015	1.1081	1.12447	1.03292	1.87247	1.58348	1.71034	1.81758	1.75928	1.76579	1.09982	1.02033	1.35268	1.29859	1.23141	1.26607	1.14419
Counties (Cities) Direct Under Ili Prefecture	2016	1.10712	1.16713	1.04175	1.94396	1.57257	1.70706	1.81699	1.75509	1.76228	1.1059	1.08043	1.48584	1.21987	1.2341	1.17359	1.17704
Counties (Cities) Direct Under Ili Prefecture	2017	1.12111	1.08985	1.04068	1.87047	1.64896	1.69018	1.8204	1.71856	1.76459	1.10793	1.13542	1.53201	1.23758	1.26037	1.6026	1.19241
Counties (Cities) Direct Under Ili Prefecture	2018	1.13637	1.09251	1.03818	1.87222	1.66351	1.5941	1.83543	1.73683	1.78103	1.10355	1.02177	2	1.25252	1.27759	1.7229	1.20086
Tarbagatai Administrative Offices	2000	1.01136	1.00287	1.00499	1.90225	1.32921	1.86708	1.94099	1.6	1.92857	1.05871	1.00112	1.00086	1.0751	1.28355	1.19123	1.05324
Tarbagatai Administrative Offices	2001	1.00623	1.0026	1.00368	1.93099	1.32939	1.90211	1.94227	1.59671	1.92955	1.05281	1	1.00189	1.06438	1.27674	1.39195	1.05838
Tarbagatai Administrative Offices	2002	1.00917	1.00112	1.00311	1.94342	1.33285	1.9061	1.93005	1.56677	1.91491	1.04256	1	1.00114	1.07428	1.28997	1.22168	1.06384
Tarbagatai Administrative Offices	2003	1.01013	1.00125	1.00159	1.98805	1.33267	1.9159	1.92617	1.65659	1.91141	1.13943	1	1.00037	1.06125	1.29378	1.15138	1.03821
Tarbagatai Administrative Offices	2004	1.00246	1.00167	1.00158	1.86699	1.33248	1.93915	1.92417	1.65958	1.90786	1.08278	1	1.00459	1.07996	1.29778	1.15134	1.03885
Tarbagatai Administrative Offices	2005	1.00443	1.0085	1.00536	1.8302	1.25973	1.95397	1.93453	1.65659	1.91847	1.09931	1	1.0116	1.07881	1.30286	1.13861	1.05041
Tarbagatai Administrative Offices	2006	1.0006	1.00144	1.00171	1.93096	1.28519	1.92985	1.93107	1.52964	1.91401	1.07244	1.00457	1.01665	1.10255	1.29945	1.14183	1.05528
Tarbagatai Administrative Offices	2007	1	1.00284	1.00317	1.92752	1.33794	1.95056	1.93108	1.70449	1.91284	1.08344	1.00063	1.00224	1.11096	1.30163	1.12821	1.06015
Tarbagatai Administrative Offices	2008	1.00155	1.00821	1.00251	1.87103	1.39433	1.92867	1.94122	1.77605	1.92383	1.07396	1.00081	1.00456	1.13058	1.29091	1.1317	1.06616
Tarbagatai Administrative Offices	2009	1.00718	1.10647	1.0412	1.88537	1.34522	1.91541	1.94971	1.78473	1.93544	1.05544	1.00304	1.00374	1.13586	1.28224	1.26206	1.07968
Tarbagatai Administrative Offices	2010	1.00841	1.07192	1.03137	1.98875	1.33248	1.87237	1.92479	1.78892	1.9042	1.0356	1	1.01603	1.10395	1.27009	1.26538	1.07763
Tarbagatai Administrative Offices	2011	1.01052	1.07478	1.0389	1.99434	1.36704	1.88985	1.91977	1.80419	1.89973	1.02289	1	1.01446	1.16084	1.26852	1.27989	1.09186
Tarbagatai Administrative Offices	2012	1.00875	1.01376	1.01229	1.97188	1.36522	1.86377	1.91068	1.81078	1.88894	1.01603	1.00991	1.01338	1.19167	1.2667	1.2859	1.10464
Tarbagatai Administrative Offices	2013	1.00983	1.02296	1.01385	1.9661	1.37432	1.91032	1.91455	1.85838	1.89371	1.03774	1.005	1.01647	1.20618	1.25296	1.29189	1.12354
Tarbagatai Administrative Offices	2014	1.01317	1.04256	1.01499	1.96169	1.37068	1.87716	1.91106	1.8503	1.89053	1.02503	1.00776	1.01495	1.23833	1.24286	1.29781	1.14461
Tarbagatai Administrative Offices	2015	1.01375	1.03537	1.0161	1.94406	1.34885	1.92553	1.94147	1.88683	1.92734	1.01112	1.00002	1.01947	1.27715	1.25503	1.30906	1.19252
Tarbagatai Administrative Offices	2016	1.01314	1.02961	1.01505	1.96122	1.3052	1.94486	1.94304	1.84446	1.93316	1.01847	1.10533	1.02601	1.2416	1.25018	1.19222	1.22904
Tarbagatai Administrative Offices	2017	1.0112	1.02475	1.01455	1.94814	1.38341	1.93403	1.93482	1.8021	1.9261	1.02621	1	1.02927	1.24942	1.23851	1.65834	1.25283
Tarbagatai Administrative Offices	2018	1.0132	1.03226	1.01527	1.95713	1.31793	1.89535	1.94155	1.82328	1.93194	1.0169	1.00852	1.04437	1.2901	1.24897	1.78881	1.24565
Altay Administrative Offices	2000	1.00476	1.00851	1.00709	1.77437	1.32284	1.95555	1.92786	1.6515	1.90703	1.06663	1.00178	1.01972	1.15012	1.28834	1.19334	1.06074
Altay Administrative Offices	2001	1.00383	1.00366	1	1.8206	1.33849	1.938	1.93322	1.66257	1.91271	1.04221	1	1.01418	1.13116	1.27919	1.22773	1.06489
Altay Administrative Offices	2002	1.00615	1.00491	1.00135	1.82732	1.36486	1.93309	1.93733	1.68653	1.91863	1.04087	1.0174	1.03096	1.1056	1.29713	1.19681	1.07069
Altay Administrative Offices	2003	1.00643	1.00518	1.00195	1.86866	1.39687	1.89876	1.94972	1.69251	1.93422	1.16915	1	1.01969	1.07996	1.29429	1.21906	1.08987
Altay Administrative Offices	2004	1.00799	1.00951	1.00467	1.83296	1.42888	1.82826	1.9568	1.70749	1.94278	1.05735	1	1.02729	1.10873	1.29809	1.22547	1.08597
Altay Administrative Offices	2005	1.00019	1.04452	1.01244	1.86168	1.4398	1.85894	1.94462	1.70749	1.92593	1.01686	1	1.04428	1.06884	1.27675	1.23755	1.09992
Altay Administrative Offices	2006	1.00221	1.00546	1.00354	1.83435	1.55984	1.71399	1.95193	1.67365	1.93334	1.00796	1	1.02713	1.08977	1.27104	1.27752	1.09888
Altay Administrative Offices	2007	1.00321	1.00164	1.00057	1.77914	1.60531	1.6771	1.93783	1.64192	1.91542	1.0113	1	1.02159	1.10272	1.25092	1.26311	1.10433
Altay Administrative Offices	2008	1.00188	1.00241	1.00106	1.76077	1.62168	1.64193	1.9333	1.70958	1.91029	1.04554	1.14022	1.01364	1.12135	1.23554	1.27303	1.10922
Altay Administrative Offices	2009	1.00877	1.02495	1.02372	1.75629	1.57621	1.76358	1.92805	1.69551	1.90342	1.07504	1.00257	1.01165	1.14888	1.21678	1.22965	1.12943
Altay Administrative Offices	2010	1.01728	1.01257	1.015	1.82494	1.60713	1.75606	1.91779	1.75479	1.89042	1.0951	1.22977	1.05645	1.19521	1.22055	1.24025	1.13792
Altay Administrative Offices	2011	1.02757	1.0121	1.01752	1.80027	1.64169	1.72975	1.90353	2	1.87131	1.09359	1.03957	1.07608	1.18985	1.21649	1.36482	1.14505
Altay Administrative Offices	2012	1.03039	1.02249	1.02212	1.81354	1.64351	1.69868	1.9468	1.17545	1.92269	1.08425	1.04824	1.10395	1.22786	1.23567	1.37573	1.16409
Altay Administrative Offices	2013	1.02814	1.02772	1.01884	1.8316	1.64896	1.77348	1.93538	1.11257	1.92084	1.08995	1.04704	1.16235	1.25391	1.22564	1.38025	1.18591
Altay Administrative Offices	2014	1.02397	1.03047	1.01999	1.84092	1.65442	1.80674	1.88671	1.75539	1.87444	1.11654	1.04952	1.15114	1.26668	1.20989	1.37471	1.21109
Altay Administrative Offices	2015	1.02175	1.03986	1.02177	1.83681	1.6235	1.87184	1.92487	1.76108	1.92085	1.06707	1.04497	1.1984	1.33255	1.21696	1.37496	1.25511
Altay Administrative Offices	2016	1.01116	1.04985	1.01893	1.85085	1.59258	1.8969	1.90226	1.7759	1.8974	1.08012	1	1.2415	1.22099	1.20135	1.27142	1.32163
Altay Administrative Offices	2017	1.01019	1.022	1.01629	1.83449	1.68534	1.89874	1.88476	1.79072	1.87776	1.08228	1	1.26804	1.23965	1.20008	1.7025	1.32477
Altay Administrative Offices	2018	1.01138	1.03107	1.0168	1.90236	1.67625	1.89895	1.88268	1.78331	1.87537	1.06137	1	1.07833	1.2401	1.21189	1.78437	1.32064
Bortala Mongolian Autonomous Prefecture	2000	1.00345	1.01943	1.00844	1.93579	1.2319	1.98175	1.92188	1.44401	1.90548	1.44431	1.00751	1.00278	1.10972	1.28281	1.09624	1.05053
Bortala Mongolian Autonomous Prefecture	2001	1.0043	1.03731	1.01067	1.93264	1.2841	1.99008	1.92481	1.48892	1.90986	1.38019	1	1.00125	1.1122	1.32166	1.11021	1.05769
Bortala Mongolian Autonomous Prefecture	2002	1.01027	1.03302	1.01245	1.8921	1.30975	1.98735	1.92276	1.61467	1.90751	1.63287	1	1.00179	1.12868	1.33804	1.1046	1.0655
Bortala Mongolian Autonomous Prefecture	2003	1.00418	1.06573	1.01442	1.9274	1.28838	2	1.93127	1.67156	1.91734	1.78247	1.00056	1.00008	1.12349	1.3023	1.11221	1.05261
Bortala Mongolian Autonomous Prefecture	2004	1.00029	1.05332	1.01183	1.94012	1.26701	1.99316	1.91364	1.70749	1.89392	2	1	1.00266	1.15877	1.2863	1.12253	1.05997
Bortala Mongolian Autonomous Prefecture	2005	1.00087	1.02826	1.01436	1.93883	1.44343	1.79013	1.92641	1.72545	1.90902	1.70477	1.00301	1.00247	1.14361	1.31313	1.1274	1.05293
Bortala Mongolian Autonomous Prefecture	2006	1.0008	1.04304	1.02	1.94844	1.45617	1.80604	1.94886	1.67126	1.93801	1.55659	1	1.00537	1.17872	1.31335	1.13696	1.05325
Bortala Mongolian Autonomous Prefecture	2007	1.00206	1.05922	1.0474	1.93658	1.42343	1.81738	1.941	1.5524	1.92772	1.46681	1	1.00237	1.16042	1.30644	1.15348	1.05637
Bortala Mongolian Autonomous Prefecture	2008	1.00781	1.00909	1.01308	1.92626	1.47617	1.80119	1.92997	1.63653	1.91315	1.47858	1.09741	1.00442	1.17823	1.30712	1.16058	1.06586
Bortala Mongolian Autonomous Prefecture	2009	1.00812	1.01057	1.04136	1.93175	1.45798	1.81526	1.91077	1.68473	1.88997	1.20503	1.01768	1.00369	1.17773	1.3	1.15142	1.07573
Bortala Mongolian Autonomous Prefecture	2010	1.00827	1.00943	1.04199	1.95276	1.32157	1.85461	1.90516	1.64341	1.88228	1.08682	1	1.04376	1.22481	1.27337	1.18201	1.06666
Bortala Mongolian Autonomous Prefecture	2011	1.0063	1.0052	1.04507	1.95232	1.37432	1.83242	1.91772	1.63862	1.89809	1.18996	1	1.05245	1.25349	1.25087	1.27397	1.07595
Bortala Mongolian Autonomous Prefecture	2012	1.00722	1.00615	1.03293	1.94962	1.44525	1.82334	1.9266	1.48982	1.90645	1.23117	1	1.04753	1.27633	1.2609	1.28112	1.08768
Bortala Mongolian Autonomous Prefecture	2013	1.00206	1.02546	1.03375	1.95618	1.51255	1.82404	1.91048	1.56287	1.88649	1.20789	1	1.03952	1.29471	1.23846	1.2771	1.10549
Bortala Mongolian Autonomous Prefecture	2014	1.00026	1.02826	1.03615	1.95661	1.56893	1.49961	1.91863	1.5479	1.89684	1.14378	1.00059	1.03818	1.31796	1.21876	1.27585	1.1214
Bortala Mongolian Autonomous Prefecture	2015	1.00162	1.02555	1.03846	1.93757	1.60349	1.46601	1.94472	1.71527	1.93152	1.13027	1	1.05066	1.32002	1.22384	1.28765	1.14335
Bortala Mongolian Autonomous Prefecture	2016	1.0039	1.02661	1.03138	1.51014	1.60167	1.39895	1.94117	1.6476	1.92558	1.07109	1.01283	1.06406	1.22752	1.23846	1.2199	1.17299
Bortala Mongolian Autonomous Prefecture	2017	1.00385	1.00651	1.03136	1.93092	1.67079	1.39056	1.93779	1.74042	1.92141	1.08519	1	1.07523	1.2853	1.23012	1.58816	1.19489
Bortala Mongolian Autonomous Prefecture	2018	1.00603	1.01101	1.03115	1.93356	1.64533	1.39086	1.94483	1.70499	1.93005	1.07557	1	1.00816	1.25067	1.24282	1.63081	1.21397
Bayangol Mongolian Autonomous Prefecture	2000	1.01219	1.00454	1.00895	1.86565	1.6868	1.57624	1.85349	1.62605	1.85201	1.00976	1	1.01078	1.20123	1.2804	1.08335	1.09571
Bayangol Mongolian Autonomous Prefecture	2001	1.0098	1.00371	1.00656	1.89597	1.68261	1.60299	1.76014	1.64162	1.77785	1.00769	1.00861	1.00284	1.19628	1.29502	1.13024	1.10188
Bayangol Mongolian Autonomous Prefecture	2002	1.01764	1.02506	1.00994	1.89025	1.68152	1.63518	1.8187	1.68653	1.8261	1.00689	1.01737	1.00296	1.15589	1.32692	1.16553	1.10848
Bayangol Mongolian Autonomous Prefecture	2003	1.01626	1.12987	1.02483	1.8976	1.68343	1.62854	1.77925	1.72246	1.75252	1.00416	1.0325	1.00255	1.17675	1.31887	1.18728	1.08575
Bayangol Mongolian Autonomous Prefecture	2004	1.02153	1.00759	1.01066	1.88524	1.68534	1.62612	1.78418	1.80329	1.78973	1.00404	1.00983	1.0069	1.17864	1.32036	1.20737	1.11443
Bayangol Mongolian Autonomous Prefecture	2005	1.02072	1.00379	1.01074	1.89957	1.72899	1.60565	1.82282	1.81527	1.82734	1.00184	1.00102	1.00537	1.1929	1.35611	1.22264	1.07074
Bayangol Mongolian Autonomous Prefecture	2006	1.01431	1.01027	1.01278	1.90233	1.75628	1.57578	1.81364	1.76168	1.81585	1.00487	1.01356	1.00383	1.2037	1.33549	1.24599	1.05703
Bayangol Mongolian Autonomous Prefecture	2007	1.01737	1.00488	1.01488	1.91734	1.73809	1.60434	1.82895	1.77567	1.82888	1.0109	1.00024	1.00468	1.245	1.35243	1.2751	1.06265
Bayangol Mongolian Autonomous Prefecture	2008	1.02811	1.31964	1.08371	1.91838	1.78174	1.58825	1.81284	1.7829	1.82062	1.0149	1	1.00297	1.25086	1.35377	1.28377	1.0623
Bayangol Mongolian Autonomous Prefecture	2009	1.0438	1.27504	1.05865	1.94492	1.71444	1.34348	1.79633	1.79012	1.79514	1.00426	1	1.0032	1.27311	1.35019	1.20597	1.08076
Bayangol Mongolian Autonomous Prefecture	2010	1.06608	1.33609	1.08503	1.94235	1.69807	1.68344	1.77804	1.71078	1.77803	1.00348	1.0211	1.00556	1.31359	1.37871	1.21638	1.08261
Bayangol Mongolian Autonomous Prefecture	2011	1.06704	1.33383	1.09596	1.95251	1.70899	1.59664	1.77768	1.69132	1.77466	1.00363	1.02256	1.0073	1.29735	1.3381	1.33028	1.08388
Bayangol Mongolian Autonomous Prefecture	2012	1.06976	1.21045	1.11155	1.94953	1.69443	1.6667	1.77862	1.70105	1.76995	1.00316	1.02249	1.01349	1.30238	1.33883	1.35222	1.09651
Bayangol Mongolian Autonomous Prefecture	2013	1.08479	1.24172	1.08211	1.94926	1.68898	1.70172	1.75109	1.66108	1.72733	1.00315	1.02177	1.01047	1.32695	1.35711	1.37213	1.09688
Bayangol Mongolian Autonomous Prefecture	2014	1.0816	1.14801	1.08789	1.95014	1.70535	1.70616	1.78988	1.68383	1.7715	1.00329	1.01826	1.00685	1.34863	1.35164	1.38581	1.10003
Bayangol Mongolian Autonomous Prefecture	2015	1.0728	1.1636	1.09386	1.93977	1.68716	1.64145	1.82427	1.67246	1.8118	1.00607	1.01855	1.0087	1.35662	1.34041	1.39268	1.1329
Bayangol Mongolian Autonomous Prefecture	2016	1.06291	1.19268	1.07815	1.65146	1.60531	1.73201	1.83446	1.67814	1.8138	1.00793	1	1.01191	1.3404	1.39876	1.39601	1.17538
Bayangol Mongolian Autonomous Prefecture	2017	1.08653	1.22759	1.05867	1.93738	1.67261	1.75673	1.81988	1.6753	1.78574	1.00713	1.02124	1.01524	1.39218	1.45122	1.73901	1.19092
Bayangol Mongolian Autonomous Prefecture	2018	1.09345	1.19282	1.06233	1.93631	1.73081	1.72347	1.8166	1.67672	1.78534	1.00397	1	1.00129	1.44516	1.48087	1.81049	1.20683
Aksu Administrative Offices	2000	1.01805	1.01856	1.00954	1.73134	1.16679	1.76887	1.92244	1.71826	1.91624	1.00025	1.01001	1.0009	1.06026	1.23125	1.07529	1.02556
Aksu Administrative Offices	2001	1.02626	1.01168	1.00614	1.80798	1.23245	1.77363	1.90403	1.7494	1.90345	1.00202	1	1.01088	1.06603	1.26693	1.18696	1.02849
Aksu Administrative Offices	2002	1.01901	1.01412	1.00913	1.74571	1.25391	1.79524	1.86378	1.73144	1.86843	1	1.00096	1.00817	1.06191	1.26137	1.07636	1.03162
Aksu Administrative Offices	2003	1.02168	1.01679	1.01033	1.82997	1.28592	1.7707	1.86586	1.75838	1.86846	1.00016	1.09467	1.00324	1.06257	1.27966	1.08848	1.03368
Aksu Administrative Offices	2004	1.0299	1.01014	1.01088	1.86195	1.31793	1.80919	1.84994	1.78234	1.84903	1.00068	1.03901	1.02343	1.06001	1.30567	1.09896	1.04661
Aksu Administrative Offices	2005	1.01934	1.00737	1.01682	1.85299	1.28519	1.83198	1.73109	1.79731	1.74063	1.00274	1	1.01449	1.05804	1.31279	1.10102	1.05527
Aksu Administrative Offices	2006	1.02239	1.03106	1.02542	1.86224	1.3052	1.82471	1.69518	1.81437	1.70595	1.0023	1.00326	1.00336	1.07881	1.3128	1.09976	1.05361
Aksu Administrative Offices	2007	1.00748	1.06896	1.01379	1.81742	1.33794	1.81151	1.67441	1.78832	1.68241	1.00236	1	1.00121	1.13239	1.32158	1.10136	1.05918
Aksu Administrative Offices	2008	1.01894	1.02408	1.01832	1.78246	1.38159	1.88877	1.72153	1.86677	1.72622	1.00585	1.0065	1.0017	1.12753	1.30853	1.10442	1.07028
Aksu Administrative Offices	2009	1.05033	1.12922	1.03012	1.81137	1.38341	1.82408	1.70459	1.87695	1.70433	1.00818	1	1.00135	1.15993	1.28358	1.25255	1.0779
Aksu Administrative Offices	2010	1.06251	1.0965	1.02313	1.8436	1.3725	1.79779	1.69022	1.85749	1.69147	1.01233	1	1.00995	1.19134	1.26215	1.25086	1.06714
Aksu Administrative Offices	2011	1.04753	1.09223	1.02157	1.80741	1.42525	1.79614	1.63191	1.82635	1.63866	1.01131	1.00846	1.00635	1.21244	1.24658	1.27473	1.07584
Aksu Administrative Offices	2012	1.0527	1.04907	1.0242	1.81417	1.43616	1.81449	1.64008	1.83802	1.63969	1.01572	1.03408	1.00628	1.22629	1.2417	1.27669	1.08623
Aksu Administrative Offices	2013	1.07714	1.06009	1.0247	1.82993	1.42706	1.84898	1.63031	1.60419	1.61677	1.0144	1.03444	1.0046	1.25523	1.24821	1.27382	1.10476
Aksu Administrative Offices	2014	1.04483	1.12992	1.0269	1.83667	1.47072	1.82874	1.62693	1.66467	1.59919	1.01272	1.03071	1.00205	1.25267	1.21829	1.2663	1.11707
Aksu Administrative Offices	2015	1.04618	1.10383	1.02893	1.84725	1.47435	1.84221	1.71658	1.63443	1.71004	1.00592	1.00497	1.00194	1.26396	1.22801	1.13067	1.12226
Aksu Administrative Offices	2016	1.05115	1.08933	1.02515	1.62631	1.47072	1.83362	1.76274	1.69117	1.76314	1.00354	1.01918	1.00235	1.23312	1.23693	1.1655	1.14891
Aksu Administrative Offices	2017	1.08552	1.03482	1.01648	1.82618	1.55802	1.794	1.75708	1.7479	1.75399	1.00633	1	1.00237	1.27359	1.27769	1.75308	1.15939
Aksu Administrative Offices	2018	1.12524	1.03855	1.01918	1.82578	1.54711	1.7808	1.76085	1.71954	1.75819	1.00506	1	1.00213	1.27745	1.32087	1.83124	1.16067
Kizilsu Kirgiz Autonomous Prefecture	2000	1.0036	1	1	1.5387	1.26082	1.91187	1.92026	1.2491	1.90747	1.08202	1	1.00058	1.09159	1.22693	1.0909	1.01037
Kizilsu Kirgiz Autonomous Prefecture	2001	1.00424	1	1	1.81813	1.39778	1.91997	1.97862	1.17455	1.9744	1.04246	1	1.17295	1.0817	1.27733	1.09537	1.01104
Kizilsu Kirgiz Autonomous Prefecture	2002	1.00648	1	1	1.38011	1.41561	1.90572	1.9745	1.30329	1.96897	1.02487	1	1.15349	1.05944	1.30372	1.1478	1.01232
Kizilsu Kirgiz Autonomous Prefecture	2003	1.00754	1	1	1.64023	1.4368	1.92753	1.9783	1.30928	1.974	1.04062	1	1.02657	1.07197	1.33833	1.12504	1.01371
Kizilsu Kirgiz Autonomous Prefecture	2004	1.00772	1	1	1.64155	1.45798	1.94385	1.96214	1.33024	1.95305	1.09017	1.00131	1.00669	1.06051	1.35058	1.13945	1.01932
Kizilsu Kirgiz Autonomous Prefecture	2005	1.00342	1	1	1.64423	1.45617	1.9472	2	1.4021	2	1.10812	1	1.03235	1.06158	1.35515	1.14654	1.01524
Kizilsu Kirgiz Autonomous Prefecture	2006	1.00252	1	1	1.6191	1.51073	1.95535	1.99825	1.43383	1.99793	1.13151	1	1.08069	1.08821	1.37256	1.14165	1.01783
Kizilsu Kirgiz Autonomous Prefecture	2007	1.00242	1.00254	1	1.59059	1.54529	1.85796	1.9971	1.4021	1.99549	1.27961	1.02648	1.06594	1.14616	1.32811	1.14459	1.01984
Kizilsu Kirgiz Autonomous Prefecture	2008	1.00165	1.0037	1.00139	1.57586	1.57257	1.93628	1.99425	1.46407	1.98991	1.24272	2	1.12983	1.16891	1.24529	1.14898	1.0232
Kizilsu Kirgiz Autonomous Prefecture	2009	1.00057	1.14593	1.02058	1.54724	1.59076	1.88806	1.98936	1.5003	1.98746	1.08709	1.05474	1.10563	1.21648	1.24672	1.33452	1.02526
Kizilsu Kirgiz Autonomous Prefecture	2010	1.00232	1.09676	1.01618	1.48982	1.63987	1.86332	1.94066	1.36886	1.93369	1.0494	1.17254	1.4538	1.24772	1.23574	1.33164	1.02917
Kizilsu Kirgiz Autonomous Prefecture	2011	1.00112	1.10049	1.01987	1.51484	1.66351	1.85154	1.91766	1.38114	1.91097	1.05773	1.10055	1.1499	1.27336	1.20352	1.35847	1.03123
Kizilsu Kirgiz Autonomous Prefecture	2012	1.00391	1.06739	1.01682	1.43852	1.69443	1.85124	1.91022	1.36886	1.88819	1.07445	1.00129	1.12719	1.27798	1.21451	1.37945	1.03563
Kizilsu Kirgiz Autonomous Prefecture	2013	1.00652	1.05701	1.01142	1.52166	1.71626	1.79256	1.88906	1.56826	1.86276	1.09492	1	1.13222	1.25143	1.23025	1.37927	1.03988
Kizilsu Kirgiz Autonomous Prefecture	2014	1.00969	1.03703	1.00765	1.58983	1.73809	1.77153	1.92591	1.52695	1.91074	1.10319	1.07139	1.0788	1.25696	1.24438	1.36732	1.04678
Kizilsu Kirgiz Autonomous Prefecture	2015	1.00842	1.03627	1.0042	1.57033	1.74718	1.78225	1.94846	1.56033	1.92314	1.04845	1.04014	1.07271	1.2948	1.22305	1.35657	1.05437
Kizilsu Kirgiz Autonomous Prefecture	2016	1.00433	1.03939	1.00614	1.89597	1.73263	1.79085	1.93811	1.59371	1.89663	1.05573	1.01078	1.0836	1.35548	1.2256	1.1695	1.06558
Kizilsu Kirgiz Autonomous Prefecture	2017	1.01029	1.02811	1.00387	1.58296	1.79083	1.66556	1.93536	1.61855	1.90554	1.0625	1.00097	1.0726	1.32175	1.24861	1.85527	1.06413
Kizilsu Kirgiz Autonomous Prefecture	2018	1.00619	1.0275	1.00471	1.67629	1.78538	1.65176	1.96158	1.6502	1.9428	1.02292	1.00093	1.01177	1.33372	1.25736	1.9595	1.06723
Kashgar Administrative Offices	2000	1.03403	1.00014	1	1.6133	1.01873	1.82754	1.97094	1.25778	1.96953	1.01938	1.00186	1.26237	1.00091	1.20969	1.27535	1.0091
Kashgar Administrative Offices	2001	1.03376	1.00036	1.00021	1.50467	1.0522	1.84423	1.97973	1.53383	1.97726	1.00581	1.0051	1.14797	1.00256	1.24239	1.06063	1.01015
Kashgar Administrative Offices	2002	1.06363	1.00033	1.00018	1.48759	1.07857	1.82313	1.97068	1.50689	1.9672	1.0036	1.00152	1.09914	1.00091	1.27711	1.05771	1.01121
Kashgar Administrative Offices	2003	1.07896	1.00208	1.00243	1.53138	1.14005	1.82161	1.97035	1.62066	1.96556	1.00708	1.00712	1.07305	1	1.3074	1.07374	1.0154
Kashgar Administrative Offices	2004	1.06873	1.00431	1.00225	1.53918	1.20153	1.80472	1.96843	1.38024	1.96193	1.01245	1.0101	1.20493	1.00725	1.32159	1.07736	1.01937
Kashgar Administrative Offices	2005	1.05164	1.00322	1.0025	1.55185	1.21335	1.79269	1.9604	1.38383	1.95199	1.01823	1.00054	1.05186	1.00997	1.31262	1.07661	1.02451
Kashgar Administrative Offices	2006	1.05641	1.00289	1.00102	1.55334	1.22517	1.79498	1.96394	1.38383	1.95653	1.06522	1.00308	1.0807	1.01401	1.35321	1.07931	1.0308
Kashgar Administrative Offices	2007	1.05836	1.04546	1.00629	1.6309	1.237	1.80394	1.96079	1.38383	1.95264	1.12764	1.01148	1.07989	1.05837	1.37664	1.08063	1.03952
Kashgar Administrative Offices	2008	1.06443	1.02984	1.01205	1.60066	1.24882	1.80681	1.96217	1.45808	1.95409	1.15313	1	1.05091	1.06785	1.34167	1.09741	1.04547
Kashgar Administrative Offices	2009	1.13296	1.1345	1.00483	1.63655	1.26701	1.79649	1.96193	1.58772	1.95443	1.05813	1	1.04254	1.10033	1.33498	1.1049	1.0567
Kashgar Administrative Offices	2010	1.13627	1.10233	1.01068	1.60562	1.2379	1.8544	1.97019	1.58443	1.9646	1.04643	1.00394	1.08971	1.14707	1.31405	1.25745	1.05009
Kashgar Administrative Offices	2011	1.09902	1.10949	1.01104	1.69583	1.35249	1.82567	1.96626	1.50898	1.96008	1.04275	1	1.0836	1.17378	1.27053	1.31041	1.06565
Kashgar Administrative Offices	2012	1.14031	1.07431	1.00691	1.7254	1.38887	1.81742	1.96795	1.5494	1.96149	1.03646	1.00938	1.05907	1.17403	1.28999	1.33854	1.07694
Kashgar Administrative Offices	2013	1.15215	1.0646	1.00797	1.77768	1.44162	1.81968	1.96997	1.47231	1.96314	1.05568	1.00322	1.0311	1.18672	1.30099	1.33891	1.09572
Kashgar Administrative Offices	2014	1.14581	1.05848	1.00759	1.79054	1.4598	1.80895	1.98005	1.39521	1.97521	1.04727	1.00316	1.00891	1.18606	1.28931	1.3334	1.09552
Kashgar Administrative Offices	2015	1.13276	1.05345	1.00724	1.77707	1.47617	1.84041	1.97338	1.4003	1.96796	1.03469	1.0091	1.00929	1.23338	1.27947	1.34235	1.10384
Kashgar Administrative Offices	2016	1.13283	1.05677	1.00703	1.98912	1.38341	1.89491	1.97779	1.44371	1.97408	1.06909	1	1.01141	1.2701	1.29741	1.33652	1.12566
Kashgar Administrative Offices	2017	1.23853	1.04801	1.00732	1.7544	1.43252	1.88072	1.97805	1.42201	1.97457	1.06964	1.00015	1.01773	1.2867	1.36071	1.96487	1.12708
Kashgar Administrative Offices	2018	1.2285	1.0476	1.00693	1.75693	1.4307	1.88026	1.97985	1.43286	1.97635	1.0336	1.00156	1.00152	1.28764	1.39025	1.98028	1.13716
Hotan Administrative Offices	2000	1.0192	1.00555	1.0006	1.27544	1	1.86873	1.94025	1.50389	1.93352	1.0297	1	1.01354	1.01657	1.18584	1	1.00046
Hotan Administrative Offices	2001	1.01811	1.00613	1.00151	1.04009	1.03747	1.91721	1.96091	1.50389	1.95489	1.03016	1	1.02557	1.01739	1.20667	1.09106	1.00006
Hotan Administrative Offices	2002	1.02172	1.00358	1.0001	1	1.07184	1.92378	1.96554	1.42904	1.95812	1.01254	1	1.01925	1.02399	1.21561	1.00349	1.0001
Hotan Administrative Offices	2003	1.03085	1.0114	1.00222	1.18957	1.12032	1.88548	1.97144	1.26737	1.96577	1.0002	1	1.0053	1.03504	1.20232	1.0505	1
Hotan Administrative Offices	2004	1.04707	1.0028	1.00011	1.22458	1.16879	1.86134	1.96874	1.29371	1.96264	1.00499	1	1.05924	1.02597	1.23317	1.05195	1.01291
Hotan Administrative Offices	2005	1.0246	1.01569	1.0005	1.28882	1.18334	1.82381	1.97311	1.30269	1.96781	1.00192	1	1.146	1.03784	1.221	1.05774	1.00692
Hotan Administrative Offices	2006	1.02347	1.02124	1.00197	1.31473	1.27246	1.80474	1.97211	1.3506	1.96619	1.00108	1	1.04065	1.06018	1.21389	1.06053	1.01097
Hotan Administrative Offices	2007	1.02016	2	1.02394	1.33159	1.2761	1.79782	1.96337	1.31287	1.95584	1.00181	1	1.04157	1.03924	1.22747	1.06111	1.01368
Hotan Administrative Offices	2008	1.02916	1.01973	1.00305	1.39439	1.29793	1.77869	1.96796	1.32126	1.9605	1.01344	1	1.0446	1.09357	1.24608	1.06607	1.01573
Hotan Administrative Offices	2009	1.03698	1.03477	1.00644	1.43159	1.35249	1.78294	1.96637	1.32275	1.95565	1.0001	1	1.03619	1.18037	1.24127	1.17502	1.01655
Hotan Administrative Offices	2010	1.05702	1.03118	1.00565	1.48967	1.36704	1.78367	1.97072	1.28563	1.96088	1.00124	1	1.05851	1.22522	1.21916	1.18653	1.01721
Hotan Administrative Offices	2011	1.05169	1.02657	1.00478	1.57235	1.42161	1.82298	1.97789	1.27096	1.96898	1.00057	1.00259	1.079	1.23824	1.1956	1.33972	1.01785
Hotan Administrative Offices	2012	1.13501	1.02391	1.00408	1.58762	1.44162	1.80895	1.98147	1.23982	1.97157	1.00081	1	1.05985	1.26355	1.23421	1.34178	1.01976
Hotan Administrative Offices	2013	1.14804	1.0205	1.00274	1.63603	1.44343	1.81784	1.9709	1.21287	1.95815	1.00121	1	1.01785	1.28367	1.23601	1.34088	1.02117
Hotan Administrative Offices	2014	1.09961	1.01532	1.00222	1.64653	1.4689	1.74102	1.97666	1.21287	1.96603	1.00086	1	1.00556	1.27938	1.18657	1.32446	1.02292
Hotan Administrative Offices	2015	1.1217	1.01344	1.00174	1.66528	1.51801	1.73873	1.977	1.15539	1.95313	1.00067	1.06708	1.0053	1.29397	1.17918	1.3073	1.02368
Hotan Administrative Offices	2016	1.11136	1.01376	1.00352	1.85254	1.50709	1.7313	1.96932	1	1.96209	1.0014	1.00531	1.00655	1.51995	1.16938	1.08452	1.02707
Hotan Administrative Offices	2017	1.15491	1.00706	1.00079	1.66404	1.59985	1.71896	1.97489	1.12365	1.96848	1.00064	1	1.00747	1.35954	1.20185	1.78177	1.02881
Hotan Administrative Offices	2018	1.165	1.00714	1.00157	1.66788	1.59622	1.70137	1.97024	1.06183	1.96281	1.00195	1	1.00121	1.37204	1.22337	1.84159	1.02832
		Innovation development			Coordinated development			Green development			Open development			Shared developmen					创新	协调	绿色	开放	共享
Urumqi City	2000	0.0751855	0.0811377	0.0578628	0.184254	0.50792	0.240858	0.196746	0.0685734	0.18145	0.0260719	0.00747555	0.110351	0.0520079	0.060457	0.0728173	0.0632132		0.214186	0.933032	0.44677	0.143898	0.248495
Urumqi City	2001	0.108112	0.0611305	0.0421198	0.178947	0.509335	0.196765	0.191166	0.111897	0.175522	0.0152679	0.00728388	0.107837	0.0725848	0.0986751	0.0752654	0.0636967		0.211363	0.885048	0.478585	0.130389	0.310222
Urumqi City	2002	0.105964	0.0790296	0.0737249	0.180105	0.507826	0.215975	0.19808	0.129616	0.18014	0.0160156	0.00667036	0.103151	0.0641027	0.10056	0.142522	0.0686739		0.258719	0.903906	0.507837	0.125837	0.375859
Urumqi City	2003	0.135878	0.0771595	0.0676632	0.182073	0.507496	0.215748	0.20132	0.103037	0.185084	0.0250332	0.00270066	0.0385653	0.0950938	0.108876	0.160643	0.066132		0.280701	0.905317	0.489441	0.0662991	0.430746
Urumqi City	2004	0.136504	0.0837405	0.0634739	0.183214	0.507166	0.21781	0.204487	0.115441	0.187979	0.0378894	0.00666701	0.0448039	0.112702	0.111292	0.174367	0.0772176		0.283718	0.90819	0.507907	0.0893603	0.475578
Urumqi City	2005	0.144254	0.0737191	0.0660613	0.170467	0.507166	0.212522	0.206152	0.116327	0.187925	0.0467549	0.0067421	0.049357	0.0833288	0.113986	0.183629	0.0851313		0.284034	0.890155	0.510404	0.102854	0.466075
Urumqi City	2006	0.171611	0.0648428	0.0507791	0.18062	0.509052	0.208756	0.211156	0.0792049	0.190747	0.0390583	0.0175509	0.0577506	0.109136	0.12002	0.158145	0.0932902		0.287233	0.898428	0.481109	0.11436	0.480592
Urumqi City	2007	0.180115	0.0625832	0.0542779	0.188468	0.502451	0.198952	0.220737	0.116947	0.199673	0.0469436	0.0185757	0.0530903	0.113063	0.120809	0.171092	0.0927281		0.296976	0.889871	0.537357	0.11861	0.497693
Urumqi City	2008	0.214049	0.125062	0.0628204	0.188232	0.504337	0.18595	0.223506	0.105872	0.198184	0.047749	0.00255785	0.0328404	0.105681	0.132216	0.190106	0.101956		0.401931	0.878519	0.527563	0.0831472	0.529959
Urumqi City	2009	0.289501	0.133838	0.0853045	0.190053	0.507166	0.244277	0.234949	0.194734	0.20285	0.0310281	0.0161264	0.0302843	0.119661	0.160392	0.178124	0.120716		0.508644	0.941496	0.632533	0.0774389	0.578892
Urumqi City	2010	0.321007	0.129351	0.0849477	0.191232	0.507166	0.235373	0.236521	0.199607	0.202604	0.0406072	0.00466614	0.0534781	0.0890621	0.166278	0.196591	0.114933		0.535305	0.93377	0.638732	0.0987515	0.566865
Urumqi City	2011	0.289906	0.121669	0.0921507	0.192028	0.509052	0.185369	0.235812	0.21201	0.202488	0.0462968	0.00819	0.0319518	0.130232	0.152859	0.226015	0.128829		0.503726	0.886449	0.650311	0.0864386	0.637934
Urumqi City	2012	0.285527	0.146409	0.11304	0.194377	0.509052	0.17423	0.25186	0.219098	0.218522	0.0439852	0.0101482	0.0338644	0.124671	0.145161	0.232139	0.138997		0.544976	0.877659	0.68948	0.0879978	0.640968
Urumqi City	2013	0.291497	0.173891	0.111347	0.193688	0.509995	0.174418	0.268173	0.227072	0.236519	0.0294138	0.00916425	0.0319632	0.124341	0.141629	0.239376	0.157632		0.576735	0.878101	0.731764	0.0705412	0.66298
Urumqi City	2014	0.292882	0.185002	0.100199	0.188058	0.510938	0.172277	0.270573	0.232388	0.242367	0.0277251	0.00836711	0.0189066	0.132368	0.142872	0.242425	0.169945		0.578083	0.871273	0.745328	0.0549988	0.68761
Urumqi City	2015	0.269913	0.186636	0.0969819	0.185202	0.509995	0.180668	0.285876	0.248335	0.261474	0.0185344	0.0104345	0.0227368	0.135588	0.134447	0.248287	0.180025		0.553531	0.875865	0.795685	0.0517057	0.698347
Urumqi City	2016	0.260525	0.214293	0.100334	0.185704	0.510938	0.169491	0.297155	0.253651	0.27296	0.0177454	0.00126104	0.0555862	0.135531	0.129066	0.241073	0.222834		0.575152	0.866133	0.823765	0.0745927	0.728503
Urumqi City	2017	0.261234	0.176454	0.0850297	0.186219	0.512824	0.166116	0.291816	0.261624	0.266077	0.0225775	0.000352442	0.0574763	0.180612	0.162306	0.356778	0.232948		0.522717	0.865159	0.819517	0.0804062	0.932643
Urumqi City	2018	0.260769	0.185765	0.0890008	0.187296	0.513767	0.172126	0.294358	0.26251	0.267987	0.0222103	5.27788e-05	0.0226422	0.19054	0.163071	0.390557	0.224564		0.535535	0.87319	0.824855	0.0449052	0.968733
Karamay City	2000	0.00555141	0.260486	0.156834	0.166496	0.517822	0.190645	0.0211792	0.117124	0.049086	0.00368606	0	0.000465516	0.0468244	0.0593484	0.3009	0.0363679		0.422872	0.874964	0.187389	0.00415158	0.443441
Karamay City	2001	0.00179834	0.204956	0.159955	0.149194	0.518483	0.085822	0.0232829	0.242133	0.0521761	0.00367729	0	0.000137288	0.043997	0.0446331	0.410234	0.0289878		0.366709	0.753499	0.317592	0.00381458	0.527852
Karamay City	2002	0.00273201	0.216118	0.155956	0.173441	0.518294	0.164317	0.032742	0.166826	0.0578539	0.00324489	0	0.000136438	0.0513796	0.0445426	0.242236	0.0325203		0.374805	0.856051	0.257422	0.00338132	0.370678
Karamay City	2003	0.00243765	0.126665	0.199191	0.180236	0.518388	0.171474	0.02562	0.192519	0.0533533	0.00352558	0.000420527	7.7975e-05	0.0589349	0.0538102	0.349063	0.0245768		0.328294	0.870099	0.271493	0.00402408	0.486384
Karamay City	2004	0.00203291	0.180419	0.271191	0.18167	0.518483	0.119462	0.00863229	0.214668	0.0379896	0.0024163	0	0.000232408	0.0786794	0.0567788	0.327165	0.0207505		0.453643	0.819615	0.26129	0.00264871	0.483374
Karamay City	2005	0.00252964	0.206071	0.327784	0.188474	0.517539	0.0546326	0.00316905	0.214668	0.0343661	0.00220393	1.55569e-05	0.000391493	0.0773914	0.0632274	0.311889	0.0190898		0.536385	0.760646	0.252204	0.00261098	0.471597
Karamay City	2006	0.00554221	0.175374	0.279925	0.187957	0.517539	0.0459737	0.0404038	0.243994	0.0730962	0.00156933	0	0.000208522	0.0795747	0.0753351	0.300443	0.0159916		0.460841	0.75147	0.357494	0.00177785	0.471344
Karamay City	2007	0.0100082	0.181776	0.288522	0.188904	0.516596	0.0354882	0.0645918	0.27075	0.0934001	0.0022864	8.10988e-06	0.000132409	0.0561076	0.0924702	0.265766	0.0179369		0.480306	0.740989	0.428742	0.00242692	0.432281
Karamay City	2008	0.0105463	0.134289	0.2212	0.190472	0.516596	0.0261595	0.071777	0.2657	0.100656	0.00170962	0	0.000117053	0.0712811	0.0948562	0.264762	0.0136708		0.366035	0.733228	0.438133	0.00182667	0.44457
Karamay City	2009	0.0104773	0.246431	0.323106	0.190279	0.51471	0.0746301	0.0454727	0.270218	0.0762936	0.00343476	0	0.000142264	0.0678254	0.0946583	0.298282	0.0266032		0.580014	0.77962	0.391984	0.00357702	0.487369
Karamay City	2010	0.00825122	0.165947	0.299851	0.199506	0.516596	0.0573537	0.0206872	0.27137	0.0491492	0.00355296	0	0.000207227	0.0366144	0.0920227	0.309763	0.0230101		0.474049	0.773456	0.341206	0.00376019	0.46141
Karamay City	2011	0.0070094	0.158341	0.297455	0.199349	0.515653	0.0485925	0.012834	0.271458	0.0458416	0.00504586	0.00221313	0.000176826	0.065375	0.0872279	0.32217	0.0250748		0.462805	0.763595	0.330134	0.00743581	0.499847
Karamay City	2012	0.00608033	0.265592	0.195227	0.198743	0.515653	0.0332269	0.0199849	0.271547	0.0514145	0.00247286	0.00245268	0.00050735	0.0536729	0.0818034	0.377737	0.0305189		0.4669	0.747623	0.342946	0.00543289	0.543732
Karamay City	2013	0.00668285	0.148065	0.186585	0.201546	0.515653	0.0258446	0.0146578	0.271636	0.0479148	0.00756402	0.00231554	0.000621245	0.0525262	0.0836524	0.39736	0.0368207		0.341333	0.743044	0.334208	0.0105008	0.570359
Karamay City	2014	0.0070416	0.237643	0.179585	0.19754	0.515653	0	0	0.27261	0.0352724	0.00495079	0	0.000933512	0.0575684	0.0822486	0.396309	0.0407784		0.424269	0.713193	0.307883	0.0058843	0.576904
Karamay City	2015	0.00637009	0.244898	0.172882	0.196935	0.513767	0.0580138	0.0467472	0.27518	0.0747805	0.0012398	0	0.00177953	0.0563903	0.078324	0.394449	0.0689923		0.42415	0.768716	0.396707	0.00301933	0.598156
Karamay City	2016	0.00733136	0.17206	0.148335	0.197855	0.512824	0.0197802	0.0372265	0.272965	0.0636899	0.00186683	0.046444	0.00212737	0.0608046	0.0828193	0.344376	0.081553		0.327726	0.730459	0.373881	0.0504382	0.569553
Karamay City	2017	0.00762111	0.163582	0.164525	0.19821	0.51471	0.0282861	0.0635035	0.272699	0.0861197	0.00108973	0	0.00239133	0.0673433	0.0835857	0.378435	0.0678281		0.335729	0.741206	0.422322	0.00348106	0.597192
Karamay City	2018	0.0120825	0.13054	0.14794	0.198788	0.515653	0.0294241	0.0807858	0.274825	0.0978571	0.00129253	0	0.00177485	0.0712745	0.0934658	0.410111	0.0552848		0.290562	0.743865	0.453468	0.00306738	0.630136
Turpan City	2000	0.00127862	0.0103719	0.00372549	0.15344	0.40362	0.152125	0.304061	0.168067	0.292227	0.00211637	0.000608042	0.0513376	0.0121106	0.0424933	0.0330793	0.0130837		0.015376	0.709185	0.764355	0.054062	0.100767
Turpan City	2001	0.000998058	0.0105358	0.00420489	0.161855	0.417955	0.152857	0.321538	0.175686	0.307305	0.000770374	0	0.043009	0.0132101	0.043622	0.0310696	0.0126555		0.0157387	0.732666	0.804529	0.0437794	0.100557
Turpan City	2002	0.00294358	0.011315	0.0064102	0.159794	0.418143	0.165593	0.328813	0.240361	0.312703	0.00026241	0.00228843	0.0309079	0.0174511	0.0458276	0.0362043	0.0225486		0.0206688	0.743531	0.881877	0.0334588	0.122032
Turpan City	2003	0.00324254	0.0108587	0.00513737	0.166352	0.416446	0.158987	0.331669	0.274028	0.31482	0.000436662	0.00201002	0.012276	0.0199958	0.0441722	0.0371427	0.0125215		0.0192386	0.741785	0.920517	0.0147227	0.113832
Turpan City	2004	0.00162357	0.00322285	0.00268463	0.183337	0.414748	0.153877	0.318319	0.274028	0.305577	0.000591312	0	0.0513401	0.0168071	0.042953	0.0372945	0.0188878		0.00753105	0.751963	0.897924	0.0519314	0.115943
Turpan City	2005	0.00129242	0.00219152	0.00234826	0.187286	0.423236	0.144246	0.310474	0.276686	0.299197	0.000161661	0.00633768	0.0242985	0.0174511	0.0409253	0.037455	0.0196169		0.0058322	0.754768	0.886357	0.0307978	0.115448
Turpan City	2006	0.000625511	0.0204647	0.0168923	0.18656	0.433609	0.148465	0.305608	0.0898364	0.293585	0.000277775	0	0.0321985	0.0166972	0.0380646	0.0450131	0.0204125		0.0379824	0.768634	0.68903	0.0324763	0.120187
Turpan City	2007	0.000708299	0.0270838	0.0313872	0.185629	0.43078	0.155517	0.290711	0.157081	0.27276	0.000304002	0.000307608	0.0592791	0.0146238	0.0337727	0.0417828	0.0198343		0.0591793	0.771926	0.720552	0.0598907	0.110014
Turpan City	2008	0.000386345	0.0397747	0.00773078	0.183332	0.433609	0.159158	0.27835	0.156638	0.258457	0.000326925	0.000948093	0.0189567	0.0159589	0.0316523	0.0460382	0.0206574		0.0478918	0.7761	0.693445	0.0202317	0.114307
Turpan City	2009	0.00429119	0.224192	0.0159528	0.180273	0.397774	0.215372	0.273017	0.156859	0.250656	0.000611194	0.000461303	0.023967	0.0149536	0.0321817	0.100826	0.0305758		0.244436	0.793419	0.680532	0.0250395	0.178537
Turpan City	2010	0.00293438	0.172587	0.018707	0.172592	0.394944	0.219887	0.235465	0.117944	0.208879	0.000438116	0	0.0778023	0.0170113	0.0297343	0.112484	0.031744		0.194229	0.787424	0.562288	0.0782404	0.190974
Turpan City	2011	0.00389105	0.178085	0.0187679	0.170856	0.406261	0.207856	0.209691	0.0790277	0.178104	0.00117101	0	0.0624874	0.0193361	0.0288503	0.148053	0.0245521		0.200744	0.784973	0.466823	0.0636584	0.220791
Turpan City	2012	0.00445217	0.244068	0.0392005	0.172805	0.390229	0.212836	0.204869	0.0485507	0.16923	0.00117951	0.00142493	0.048473	0.0235143	0.0303224	0.167426	0.0273801		0.28772	0.77587	0.422649	0.0510774	0.248642
Turpan City	2013	0.00297118	0.23641	0.0494563	0.173956	0.377027	0.213524	0.194601	0.190393	0.157579	0.00293155	0.00150043	0.0186408	0.0340541	0.0272746	0.163376	0.0295733		0.288838	0.764507	0.542574	0.0230728	0.254278
Turpan City	2014	0.00321034	0.196606	0.0435182	0.175337	0.368539	0.224461	0.21743	0.210327	0.177112	0.00116184	3.46091e-05	0.0160113	0.0395832	0.0262441	0.158423	0.0368913		0.243334	0.768338	0.604869	0.0172077	0.261141
Turpan City	2015	0.00398303	0.206805	0.0353099	0.171768	0.313843	0.275368	0.2455	0.248423	0.20649	0.00165839	0.00283209	0.0194323	0.0448766	0.0261091	0.138856	0.0573086		0.246098	0.760979	0.700413	0.0239228	0.267151
Turpan City	2016	0.00381286	0.158651	0.0345299	0.171569	0.308185	0.265489	0.224275	0.252942	0.179429	0.000838977	0	0.0227667	0.050268	0.0297458	0.131651	0.0605781		0.196993	0.745243	0.656646	0.0236057	0.272243
Turpan City	2017	0.00246985	0.0966388	0.0308905	0.172044	0.354394	0.248367	0.186173	0.232299	0.127432	0.000289568	0	0.0238976	0.0610012	0.0295325	0.330182	0.0606657		0.129999	0.774805	0.545904	0.0241871	0.481381
Turpan City	2018	0.00310916	0.0565399	0.0260571	0.17326	0.370425	0.239207	0.19043	0.24262	0.12498	0.00090303	3.5116e-05	0.0216679	0.0610584	0.0319103	0.376626	0.0593799		0.0857062	0.782892	0.55803	0.022606	0.528974
Hami City	2000	0.00258023	0.00388066	0.00501467	0.130212	0.335533	0.235932	0.287993	0.201645	0.261314	0.014396	0.00259998	0.000907876	0.0369286	0.0507055	0.063452	0.0205686		0.0114756	0.701676	0.750952	0.0179038	0.171655
Hami City	2001	0.00155458	0.00967646	0.00215642	0.180454	0.354771	0.241991	0.289819	0.206695	0.260774	0.0166743	0.000449935	0.00194836	0.035829	0.0468116	0.0748198	0.021562		0.0133875	0.777216	0.757288	0.0190726	0.179023
Hami City	2002	0.00306316	0.00908902	0.00258053	0.133319	0.365616	0.248495	0.28608	0.21201	0.257662	0.00902516	0.000526687	0.0025097	0.0380281	0.053669	0.0643406	0.0227019		0.0147327	0.74743	0.755753	0.0120615	0.17874
Hami City	2003	0.00322874	0.0081646	0.00191527	0.14499	0.359533	0.250552	0.283562	0.217326	0.254089	0.0113356	0.000254191	9.51816e-05	0.0337242	0.0534595	0.0704555	0.0230568		0.0133086	0.755075	0.754978	0.011685	0.180696
Hami City	2004	0.00269062	0.00452767	0.00210406	0.152507	0.353451	0.25189	0.27032	0.233274	0.236847	0.00608997	0.00312625	0.0050333	0.0416094	0.0620695	0.081869	0.0267765		0.00932234	0.757848	0.740441	0.0142495	0.212324
Hami City	2005	0.00103945	0.00243876	0.000880217	0.158395	0.370425	0.230475	0.27134	0.200493	0.240464	0.00428077	0.00199085	0.0227889	0.0347609	0.0602363	0.0948376	0.0248431		0.00435843	0.759295	0.712296	0.0290605	0.214678
Hami City	2006	0.00103025	0.0045262	0.00242577	0.163174	0.37797	0.223118	0.266014	0.200227	0.233664	0.0075256	0.00684486	0.0258748	0.0367087	0.0606335	0.117945	0.0280529		0.00798223	0.764262	0.699905	0.0402453	0.243341
Hami City	2007	0.000800286	0.00586787	0.00376562	0.166316	0.375141	0.223561	0.274084	0.225388	0.242426	0.00662476	0.00101423	0.0163525	0.0403842	0.0592516	0.11925	0.0323471		0.0104338	0.765018	0.741899	0.0239915	0.251233
Hami City	2008	0.000708299	0.00251892	0.00640828	0.180177	0.390229	0.141988	0.277586	0.247272	0.247469	0.00461677	0.0220807	0.0130124	0.0431645	0.0564857	0.124384	0.0325556		0.0096355	0.712394	0.772327	0.0397099	0.25659
Hami City	2009	0.00222148	0.0255192	0.0186254	0.180205	0.375141	0.221725	0.25997	0.257903	0.229182	0.00433067	0.00440624	0.011923	0.0423006	0.0559986	0.087384	0.0412626		0.046366	0.777071	0.747056	0.0206599	0.226946
Hami City	2010	0.00249284	0.0164334	0.0170754	0.180251	0.385514	0.225651	0.261773	0.2556	0.230395	0.00114625	0.0169014	0.0199404	0.0469343	0.0535456	0.0994301	0.0427833		0.0360017	0.791417	0.747768	0.0379881	0.242693
Hami City	2011	0.0021019	0.0155196	0.0203071	0.182275	0.397774	0.221339	0.25738	0.269155	0.222363	0.00100151	0.0107725	0.0155804	0.0564845	0.0488183	0.138704	0.0472228		0.0379285	0.801387	0.748898	0.0273544	0.29123
Hami City	2012	0.00219849	0.0156791	0.0158509	0.182053	0.405318	0.201153	0.23759	0.275534	0.203397	0.00080415	0.0100542	0.0153895	0.0548981	0.05211	0.141796	0.0561679		0.0337284	0.788524	0.71652	0.0262479	0.304972
Hami City	2013	0.00425439	0.0198275	0.0142913	0.185205	0.415691	0.177573	0.159238	0.271724	0.1187	0.00200727	0.00559962	0.0108645	0.0568144	0.0538194	0.144064	0.0636056		0.0383732	0.778469	0.549662	0.0184714	0.318303
Hami City	2014	0.00454875	0.0124026	0.0134428	0.18463	0.431723	0.15919	0.0508733	0.250727	0	0.00827157	0.00393249	0.00507179	0.0590135	0.052801	0.144951	0.0724652		0.0303942	0.775543	0.3016	0.0172758	0.329231
Hami City	2015	0.00505468	0.0228476	0.0122721	0.183386	0.433609	0.164874	0.143696	0.228755	0.101782	0.008529	0.00905986	0.00591574	0.0658777	0.0536387	0.148603	0.0853606		0.0401744	0.78187	0.474233	0.0235046	0.353479
Hami City	2016	0.00441077	0.0355898	0.013742	0.184101	0.43078	0.157083	0.124037	0.238855	0.0802653	0.012029	0.000132543	0.00711063	0.0490527	0.0609368	0.130179	0.0992077		0.0537425	0.771964	0.443157	0.0192721	0.339376
Hami City	2017	0.00356449	0.0216701	0.0131004	0.184117	0.444926	0.152002	0.158986	0.237526	0.117719	0.00216034	0.000213894	0.00635446	0.0501091	0.0612315	0.27868	0.0979223		0.038335	0.781044	0.514231	0.00872869	0.487943
Hami City	2018	0.00400603	0.025824	0.0128869	0.184515	0.449641	0.146262	0.111514	0.238191	0.0684853	0.00210352	0.00114726	0.00028094	0.0524514	0.0597458	0.294189	0.09773		0.042717	0.780419	0.41819	0.00353171	0.504117
Changji Hui Autonomous Prefecture	2000	0.00887674	0.00532479	0.00298328	0.196104	0.180875	0.224803	0.286995	0.160182	0.259769	0.018079	0.00390971	0.000204966	0.0133672	0.0456359	0.07566	0.0160217		0.0171848	0.601782	0.706946	0.0221937	0.150685
Changji Hui Autonomous Prefecture	2001	0.00344951	0.0116547	0.00209177	0.195608	0.217842	0.22352	0.295508	0.122528	0.269305	0.00826715	0.00232355	0.0001903	0.0146238	0.0434948	0.0438557	0.0169814		0.0171959	0.63697	0.687341	0.010781	0.118956
Changji Hui Autonomous Prefecture	2002	0.00735895	0.00372476	0.00245468	0.196425	0.220388	0.222027	0.29979	0.165055	0.274588	0.0167166	0.000111132	0.000164535	0.0199644	0.0504149	0.0616698	0.0188525		0.0135384	0.63884	0.739432	0.0169923	0.150901
Changji Hui Autonomous Prefecture	2003	0.0111166	0.0098283	0.00346113	0.201332	0.227508	0.22959	0.30199	0.181002	0.272546	0.0271583	0.00705159	0.000138485	0.0236556	0.0540768	0.0556223	0.0186439		0.024406	0.65843	0.755538	0.0343484	0.151999
Changji Hui Autonomous Prefecture	2004	0.0151962	0.00310798	0.0022619	0.204228	0.234628	0.225547	0.292105	0.180116	0.261595	0.0162571	0.00284675	0.000153948	0.031211	0.0605973	0.0687809	0.0248089		0.0205661	0.664403	0.733815	0.0192578	0.185398
Changji Hui Autonomous Prefecture	2005	0.0133979	0.00565346	0.00268817	0.199943	0.224255	0.224109	0.300273	0.192519	0.275033	0.0324935	0.0023603	8.27878e-05	0.0331745	0.0610878	0.0706178	0.0268834		0.0217395	0.648306	0.767825	0.0349366	0.191763
Changji Hui Autonomous Prefecture	2006	0.0207384	0.112421	0.0145479	0.199538	0.2384	0.224588	0.300327	0.172231	0.274662	0.0480013	0.00219501	0.00019927	0.0324362	0.06578	0.0716773	0.030734		0.147707	0.662527	0.74722	0.0503956	0.200627
Changji Hui Autonomous Prefecture	2007	0.0295094	0.0492286	0.0129432	0.191142	0.228027	0.219785	0.296212	0.200139	0.270019	0.0782759	0.00283667	6.91121e-06	0.0401172	0.0749355	0.077952	0.038625		0.0916812	0.638953	0.766369	0.0811195	0.23163
Changji Hui Autonomous Prefecture	2008	0.0360681	0.0320456	0.0120902	0.194207	0.237457	0.22269	0.281934	0.233096	0.254313	0.0870442	0.0186481	0	0.0540184	0.078135	0.0865298	0.044058		0.0802039	0.654354	0.769343	0.105692	0.262741
Changji Hui Autonomous Prefecture	2009	0.0324254	0.0520267	0.0162554	0.193796	0.240286	0.230469	0.269141	0.235134	0.239756	0.0467066	0.00825338	5.57157e-06	0.0580867	0.0769844	0.146104	0.053851		0.100708	0.664551	0.744031	0.0549656	0.335026
Changji Hui Autonomous Prefecture	2010	0.0325358	0.0754592	0.0152427	0.202572	0.240286	0.228524	0.252605	0.235134	0.222671	0.0337852	0.00548996	0.00027607	0.0610397	0.0729616	0.158713	0.0555351		0.123238	0.671382	0.71041	0.0395513	0.34825
Changji Hui Autonomous Prefecture	2011	0.045138	0.0868844	0.0153119	0.205331	0.265748	0.230695	0.233438	0.207315	0.201213	0.0260401	0.00610647	0.000726478	0.0669929	0.0825814	0.145625	0.0604228		0.147334	0.701774	0.641966	0.0328731	0.355623
Changji Hui Autonomous Prefecture	2012	0.0458095	0.0977847	0.0267381	0.205361	0.271406	0.233633	0.239771	0.237881	0.204777	0.0218099	0.00589489	0.00218412	0.0743441	0.0832479	0.149127	0.069268		0.170332	0.7104	0.682429	0.0298889	0.375987
Changji Hui Autonomous Prefecture	2013	0.04632	0.112879	0.0213792	0.20402	0.280837	0.247551	0.208321	0.237881	0.15417	0.0139635	0.00541952	0.00169047	0.0734487	0.0851132	0.15577	0.0831184		0.180578	0.732408	0.600372	0.0210734	0.39745
Changji Hui Autonomous Prefecture	2014	0.0448758	0.0646796	0.0177697	0.203127	0.307242	0.234164	0.194255	0.238146	0.12991	0.0110892	0.0064638	0.00150966	0.0725377	0.0801081	0.16125	0.0998153		0.127325	0.744534	0.562312	0.0190627	0.413711
Changji Hui Autonomous Prefecture	2015	0.0515863	0.0736893	0.0142652	0.200375	0.314786	0.240789	0.191729	0.239121	0.11833	0.0104178	0.00359825	0.00221537	0.0748624	0.0858129	0.165919	0.116522		0.139541	0.75595	0.54918	0.0162315	0.443116
Changji Hui Autonomous Prefecture	2016	0.0458417	0.0888866	0.0149289	0.198811	0.332704	0.241335	0.196288	0.226097	0.120036	0.00907017	0.00190955	0.00262201	0.063784	0.0799299	0.120689	0.133549		0.149657	0.77285	0.542422	0.0136017	0.397952
Changji Hui Autonomous Prefecture	2017	0.0474192	0.134173	0.0173337	0.197348	0.355337	0.236717	0.198998	0.243816	0.126512	0.00485342	0.000762136	0.00300899	0.0666361	0.0789711	0.275177	0.145688		0.198926	0.789402	0.569326	0.00862455	0.566472
Changji Hui Autonomous Prefecture	2018	0.0480034	0.112294	0.0140356	0.195756	0.36571	0.220912	0.206431	0.234957	0.139623	0.00584104	0.000136493	0.00424706	0.0716935	0.0801692	0.295202	0.138611		0.174333	0.782378	0.581011	0.0102246	0.585676
prefectures and cities directly under Ili Kazak Autonomous Prefecture	2000	0.0105463	0.0186731	0.00397449	0.188303	0.130045	0.205318	0.324463	0.270395	0.302193	0.0480004	0.000143734	0.00768647	0.00834074	0.0437512	0.0463217	0.00971466		0.0331939	0.523666	0.897051	0.0558306	0.108128
prefectures and cities directly under Ili Kazak Autonomous Prefecture	2001	0.0139452	0.00916496	0.00340304	0.16856	0.182289	0.205856	0.314815	0.172142	0.291147	0.0188093	0.000881561	0.0105371	0.0128959	0	0.0485851	0.008757		0.0265132	0.556706	0.778104	0.0302279	0.0702381
Counties (Cities) Direct Under Ili Prefecture	2002	0.0152606	0.00781517	0.00413873	0.178601	0.194643	0.212832	0.312466	0.243019	0.288633	0.028023	0	0.00688311	0.0157233	0.038213	0.0519126	0.0101977		0.0272145	0.586076	0.844118	0.0349062	0.116047
Counties (Cities) Direct Under Ili Prefecture	2003	0.0148605	0.0133695	0.00563547	0.175118	0.217936	0.214868	0.318128	0.246563	0.295102	0.078891	0.000195643	0.00540802	0.0166029	0.0402903	0.0537604	0.0087657		0.0338654	0.607922	0.859793	0.0844947	0.119419
Counties (Cities) Direct Under Ili Prefecture	2004	0.0146719	0.0132567	0.00589771	0.17367	0.241229	0.212494	0.315584	0.246563	0.291635	0.0782928	0.00596062	0.0113135	0.01676	0.0413187	0.0568793	0.0109718		0.0338263	0.627393	0.853782	0.0955669	0.12593
Counties (Cities) Direct Under Ili Prefecture	2005	0.0159827	0.0247453	0.00657221	0.179457	0.267634	0.183019	0.306233	0.242045	0.281464	0.121941	0.00445893	0.0225432	0.0170585	0.0430724	0.059276	0.011225		0.0473002	0.630111	0.829742	0.148943	0.130632
Counties (Cities) Direct Under Ili Prefecture	2006	0.015509	0.0122268	0.00620475	0.180444	0.282723	0.180144	0.294053	0.244614	0.267647	0.12115	0.00155535	0.00875486	0.0190219	0.0432038	0.0624251	0.012596		0.0339406	0.643312	0.806314	0.13146	0.137247
Counties (Cities) Direct Under Ili Prefecture	2007	0.0149065	0.0127375	0.00591413	0.17738	0.284609	0.176735	0.294851	0.249752	0.266868	0.111877	0.00102466	0.006628	0.0223519	0.042043	0.0688059	0.0137463		0.0335581	0.638724	0.811472	0.119529	0.146947
Counties (Cities) Direct Under Ili Prefecture	2008	0.020743	0.0126109	0.00646029	0.176294	0.301584	0.175541	0.298485	0.228932	0.270147	0.203388	0.00224912	0.0104595	0.0252107	0.0428659	0.0723894	0.0154014		0.0398142	0.653418	0.797565	0.216096	0.155867
Counties (Cities) Direct Under Ili Prefecture	2009	0.0294404	0.0286634	0.0104175	0.17401	0.293096	0.17437	0.292419	0.237083	0.261164	0.101854	0.00746855	0.0113477	0.0309283	0.0444537	0.05524	0.0184318		0.0685213	0.641476	0.790666	0.12067	0.149054
Counties (Cities) Direct Under Ili Prefecture	2010	0.0357185	0.0207954	0.00937668	0.174006	0.293096	0.178765	0.282983	0.237526	0.249672	0.108675	0.01794	0.0399462	0.0420178	0.0439228	0.056084	0.0192276		0.0658906	0.645867	0.770181	0.166561	0.161252
Counties (Cities) Direct Under Ili Prefecture	2011	0.0271867	0.0202498	0.0102895	0.180599	0.300641	0.171171	0.286707	0.239475	0.253489	0.0976653	0.00384351	0.120084	0.0387192	0.039848	0.10692	0.0209785		0.057726	0.652411	0.779672	0.221593	0.206465
Counties (Cities) Direct Under Ili Prefecture	2012	0.0295186	0.0336961	0.0108783	0.180987	0.297812	0.170245	0.286331	0.241336	0.253334	0.0837407	0.0037486	0.116416	0.0462118	0.0394518	0.108729	0.0243601		0.074093	0.649043	0.781001	0.203906	0.218752
Counties (Cities) Direct Under Ili Prefecture	2013	0.0327289	0.0658983	0.0157931	0.182877	0.297812	0.172535	0.262629	0.255866	0.226135	0.0915895	0.00301999	0.117868	0.0488349	0.0390768	0.108579	0.0267218		0.11442	0.653223	0.744629	0.212477	0.223213
Counties (Cities) Direct Under Ili Prefecture	2014	0.030765	0.0334573	0.0130245	0.182052	0.295925	0.188395	0.259018	0.256574	0.218854	0.087833	0.00124104	0.111797	0.0507513	0.0382144	0.108315	0.0305019		0.0772468	0.666373	0.734446	0.200871	0.227783
Counties (Cities) Direct Under Ili Prefecture	2015	0.0347021	0.0437164	0.0107896	0.179172	0.302527	0.196165	0.294639	0.22468	0.26321	0.0484879	0.0032913	0.124266	0.0568929	0.0384785	0.10915	0.0335879		0.0892081	0.677863	0.782528	0.176045	0.238109
Counties (Cities) Direct Under Ili Prefecture	2016	0.0343847	0.0586976	0.0136848	0.193851	0.296868	0.195259	0.294424	0.223439	0.262004	0.0514407	0.0130218	0.171183	0.0418944	0.038926	0.0712138	0.0412421		0.106767	0.685979	0.779868	0.235645	0.193276
Counties (Cities) Direct Under Ili Prefecture	2017	0.0388783	0.0315547	0.0133328	0.17876	0.336476	0.190597	0.295654	0.212631	0.262796	0.0524245	0.0219259	0.18745	0.0452677	0.0432946	0.247207	0.0448216		0.0837658	0.705833	0.771081	0.2618	0.380591
Counties (Cities) Direct Under Ili Prefecture	2018	0.0437766	0.0324899	0.0125137	0.17912	0.34402	0.164064	0.30107	0.218035	0.26845	0.0502973	0.00352399	0.352345	0.0481156	0.0461576	0.296557	0.0467891		0.0887802	0.687204	0.787555	0.406166	0.437619
Tarbagatai Administrative Offices	2000	0.00364728	0.00100841	0.00163639	0.185287	0.17069	0.23945	0.339114	0.177547	0.31916	0.0285191	0.000181005	0.000301554	0.0143096	0.0471485	0.0784482	0.0124027		0.00629208	0.595427	0.83582	0.0290017	0.152309
Tarbagatai Administrative Offices	2001	0.00200071	0.00091291	0.0012057	0.19119	0.170784	0.249123	0.339575	0.176572	0.319496	0.0256527	0	0.00066599	0.0122676	0.0460166	0.16079	0.0135995		0.00411932	0.611096	0.835643	0.0263187	0.232674
Tarbagatai Administrative Offices	2002	0.00294358	0.000393379	0.00101881	0.19374	0.172576	0.250226	0.335169	0.167712	0.314464	0.0206716	0	0.000401202	0.0141525	0.0482165	0.0909387	0.0148708		0.00435577	0.616543	0.817346	0.0210728	0.168179
Tarbagatai Administrative Offices	2003	0.00325174	0.000439941	0.000521996	0.202907	0.172482	0.252931	0.333771	0.194291	0.31326	0.0677286	0	0.000128802	0.0116707	0.0488489	0.0621	0.00890105		0.00421367	0.62832	0.841322	0.0678574	0.131521
Tarbagatai Administrative Offices	2004	0.000791087	0.000587912	0.000516898	0.178046	0.172387	0.259352	0.333052	0.195177	0.31204	0.0402094	0	0.00161576	0.0152364	0.0495147	0.0620845	0.0090489		0.0018959	0.609786	0.840269	0.0418251	0.135884
Tarbagatai Administrative Offices	2005	0.0014212	0.00298481	0.00175683	0.170491	0.134666	0.263447	0.336786	0.194291	0.315686	0.0482378	0	0.00408697	0.0150165	0.0503585	0.0568606	0.0117435		0.00616284	0.568603	0.846763	0.0523247	0.133979
Tarbagatai Administrative Offices	2006	0.000193172	0.000504469	0.000560975	0.191183	0.147868	0.256785	0.335538	0.156727	0.314156	0.0351865	0.000739317	0.00586637	0.0195403	0.0497916	0.0581853	0.0128769		0.00125862	0.595837	0.806421	0.0417922	0.140394
Tarbagatai Administrative Offices	2007	0	0.000996586	0.00103785	0.190476	0.175217	0.262503	0.335543	0.208467	0.313752	0.0405292	0.000102437	0.000787832	0.0211424	0.0501538	0.0525978	0.0140119		0.00203444	0.628196	0.857762	0.0414194	0.137906
Tarbagatai Administrative Offices	2008	0.000496729	0.00288497	0.000824094	0.178875	0.204451	0.256458	0.339196	0.229641	0.317529	0.0359241	0.000131466	0.00160649	0.0248808	0.0483721	0.0540269	0.0154128		0.0042058	0.639784	0.886366	0.0376621	0.142693
Tarbagatai Administrative Offices	2009	0.00230427	0.0373915	0.0135034	0.181819	0.178989	0.252797	0.342256	0.23221	0.32152	0.026928	0.000491928	0.00131746	0.0258861	0.0469306	0.107507	0.0185614		0.0531992	0.613604	0.895986	0.0287374	0.198885
Tarbagatai Administrative Offices	2010	0.00269982	0.0252598	0.0102821	0.203051	0.172387	0.240912	0.333274	0.233451	0.310783	0.0172912	0	0.00564861	0.0198073	0.0449108	0.10887	0.0180842		0.0382417	0.616351	0.877507	0.0229398	0.191672
Tarbagatai Administrative Offices	2011	0.00337592	0.0262627	0.0127511	0.204199	0.190305	0.245739	0.331466	0.237969	0.309248	0.0111205	0	0.00509497	0.0306455	0.0446483	0.114818	0.0213982		0.0423897	0.640243	0.878683	0.0162155	0.21151
Tarbagatai Administrative Offices	2012	0.0028102	0.00483331	0.0040295	0.199586	0.189362	0.238536	0.328189	0.239918	0.305539	0.00778623	0.00160486	0.00471592	0.0365202	0.0443464	0.117286	0.0243747		0.011673	0.627484	0.873646	0.014107	0.222527
Tarbagatai Administrative Offices	2013	0.00315515	0.00806324	0.00453997	0.1984	0.194077	0.251391	0.329586	0.254005	0.307179	0.0183315	0.000808801	0.00580429	0.0392847	0.0420621	0.119744	0.0287791		0.0157584	0.643868	0.89077	0.0249446	0.22987
Tarbagatai Administrative Offices	2014	0.0042268	0.0149467	0.00491478	0.197494	0.192191	0.242233	0.328326	0.251613	0.306086	0.0121592	0.00125719	0.00526774	0.0454107	0.0403826	0.12217	0.0336873		0.0240883	0.631918	0.886024	0.0186841	0.241651
Tarbagatai Administrative Offices	2015	0.00441537	0.0124236	0.00527657	0.193872	0.180875	0.255591	0.339286	0.262422	0.318736	0.00540147	3.84517e-06	0.00686056	0.052809	0.0424054	0.126788	0.0448481		0.0221155	0.630338	0.920444	0.0122659	0.26685
Tarbagatai Administrative Offices	2016	0.0042176	0.0103997	0.00493391	0.197396	0.158242	0.260931	0.339853	0.249885	0.320737	0.00897134	0.0170536	0.00916617	0.0460354	0.0415995	0.0788533	0.0533542		0.0195512	0.616569	0.910475	0.0351911	0.219842
Tarbagatai Administrative Offices	2017	0.00359669	0.00869228	0.00476832	0.194711	0.198793	0.25794	0.336891	0.237349	0.31831	0.0127313	0	0.0103131	0.0475254	0.0396592	0.270074	0.0588959		0.0170573	0.651443	0.89255	0.0230444	0.416155
Tarbagatai Administrative Offices	2018	0.004236	0.0113315	0.00500406	0.196558	0.164843	0.247258	0.339314	0.243617	0.320319	0.00821019	0.0013792	0.0156318	0.0552752	0.0413988	0.323598	0.0572236		0.0205715	0.608658	0.90325	0.0252212	0.477496
Altay Administrative Offices	2000	0.00152698	0.00299016	0.0023231	0.159025	0.167389	0.263882	0.334383	0.192785	0.311757	0.0323664	0.000288744	0.00694869	0.0286035	0.0479442	0.0793149	0.0141493		0.00684024	0.590296	0.838924	0.0396038	0.170012
Altay Administrative Offices	2001	0.00122803	0.00128457	0	0.168518	0.175499	0.259036	0.336313	0.196063	0.313709	0.0205049	0	0.00499558	0.0249908	0.046424	0.0934219	0.0151171		0.00251259	0.603053	0.846086	0.0255005	0.179954
Altay Administrative Offices	2002	0.00197312	0.00172499	0.000442108	0.169899	0.189174	0.257679	0.337793	0.203151	0.315743	0.0198507	0.00281782	0.010909	0.0201214	0.0494064	0.0807374	0.0164674		0.00414022	0.616752	0.856687	0.0335775	0.166733
Altay Administrative Offices	2003	0.00206511	0.00182073	0.000639534	0.178389	0.205771	0.248197	0.342259	0.204923	0.321102	0.082162	0	0.006938	0.0152364	0.0489344	0.0898654	0.0209355		0.00452537	0.632357	0.868284	0.0891	0.174972
Altay Administrative Offices	2004	0.00256643	0.00334101	0.00153125	0.171057	0.222368	0.22873	0.344811	0.209353	0.324043	0.0278556	0	0.00961614	0.0207183	0.0495656	0.0924949	0.020027		0.00743869	0.622156	0.878206	0.0374717	0.182806
Altay Administrative Offices	2005	5.97915e-05	0.0156363	0.00407806	0.176955	0.228027	0.237202	0.34042	0.209353	0.31825	0.00819008	0	0.0156015	0.0131158	0.0460172	0.0974502	0.0232762		0.0197742	0.642184	0.868023	0.0237916	0.179859
Altay Administrative Offices	2006	0.000708299	0.00191689	0.00116086	0.171343	0.290267	0.197173	0.343057	0.199341	0.320798	0.00386713	0	0.00955956	0.0171056	0.0450686	0.113848	0.0230333		0.00378605	0.658784	0.863196	0.0134267	0.199055
Altay Administrative Offices	2007	0.00103025	0.000575687	0.000186265	0.160005	0.313843	0.186986	0.337975	0.18995	0.314638	0.00548784	0	0.00760699	0.0195717	0.041722	0.107936	0.0243031		0.00179221	0.660834	0.842563	0.0130948	0.193533
Altay Administrative Offices	2008	0.000602514	0.000845678	0.000348276	0.156231	0.322331	0.177273	0.336341	0.209973	0.312877	0.0221213	0.0227031	0.00480452	0.0231216	0.0391654	0.112006	0.0254414		0.00179647	0.655834	0.859191	0.049629	0.199735
Altay Administrative Offices	2009	0.0028148	0.00876395	0.00777479	0.155312	0.298755	0.210868	0.334451	0.205809	0.310516	0.0364512	0.000415617	0.00410591	0.0283679	0.0360455	0.0942103	0.0301504		0.0193535	0.664935	0.850776	0.0409727	0.188774
Altay Administrative Offices	2010	0.00554681	0.00441581	0.00491667	0.169411	0.314786	0.208791	0.330754	0.223351	0.306046	0.0461926	0.0372015	0.0198912	0.0371956	0.0366733	0.0985578	0.0321292		0.0148793	0.692988	0.86015	0.103285	0.204556
Altay Administrative Offices	2011	0.00884914	0.00424825	0.00574348	0.164344	0.332704	0.201524	0.325613	0.295911	0.299477	0.0454621	0.00640635	0.0268079	0.0361746	0.035998	0.14966	0.033788		0.0188409	0.698572	0.921001	0.0786763	0.255621
Altay Administrative Offices	2012	0.00975521	0.00789751	0.00725138	0.16707	0.333647	0.192945	0.341207	0.0519173	0.31714	0.0409264	0.00781109	0.0366278	0.0434158	0.0391863	0.154136	0.0382249		0.0249041	0.693661	0.710264	0.0853654	0.274963
Altay Administrative Offices	2013	0.00903311	0.00973635	0.00617454	0.170777	0.336476	0.213602	0.337091	0.0333121	0.316502	0.043695	0.00761675	0.0572025	0.0483794	0.0375197	0.15599	0.0433082		0.024944	0.720855	0.686905	0.108514	0.285197
Altay Administrative Offices	2014	0.0076947	0.0106998	0.00655219	0.172693	0.339305	0.222785	0.319551	0.223528	0.300552	0.0566073	0.00801718	0.0532549	0.0508141	0.0349009	0.153719	0.0491739		0.0249466	0.734783	0.843631	0.117879	0.288608
Altay Administrative Offices	2015	0.00698181	0.0139976	0.0071354	0.171849	0.323274	0.240763	0.333304	0.225211	0.316506	0.0325805	0.0072804	0.0699067	0.0633645	0.0360751	0.153822	0.0594267		0.0281148	0.735886	0.875021	0.109768	0.312688
Altay Administrative Offices	2016	0.00358289	0.0175065	0.00620477	0.174732	0.307242	0.247686	0.325157	0.229597	0.308447	0.0389203	0	0.0850926	0.0421083	0.0334797	0.111345	0.0749218		0.0272942	0.72966	0.8632	0.124013	0.261855
Altay Administrative Offices	2017	0.00327013	0.00772543	0.00533857	0.171371	0.355337	0.248194	0.318849	0.233982	0.301694	0.0399679	0	0.0944429	0.0456636	0.0332688	0.28819	0.0756539		0.0163341	0.774902	0.854525	0.134411	0.442777
Altay Administrative Offices	2018	0.00365188	0.0109118	0.00550768	0.185309	0.350622	0.248252	0.318099	0.23179	0.300873	0.0298111	0	0.0275983	0.0457494	0.035232	0.321774	0.074692		0.0200713	0.784184	0.850761	0.0574094	0.477447
Bortala Mongolian Autonomous Prefecture	2000	0.00110844	0.00682231	0.00276688	0.192174	0.120237	0.271118	0.332225	0.131388	0.311223	0.215823	0.00121645	0.000979125	0.0209068	0.0470243	0.0394795	0.0117711		0.0106976	0.583529	0.774836	0.218018	0.119182
Bortala Mongolian Autonomous Prefecture	2001	0.0013798	0.0131052	0.0034985	0.191527	0.147303	0.273416	0.333282	0.144677	0.312728	0.184679	0	0.000440371	0.021378	0.0534844	0.0452129	0.0134385		0.0179835	0.612246	0.790687	0.185119	0.133514
Bortala Mongolian Autonomous Prefecture	2002	0.00329773	0.0115978	0.00408005	0.183203	0.160599	0.272662	0.332543	0.181888	0.311921	0.307417	0	0.000631775	0.0245196	0.0562094	0.04291	0.0152587		0.0189756	0.616465	0.826351	0.308049	0.138898
Bortala Mongolian Autonomous Prefecture	2003	0.00134301	0.0230865	0.00472593	0.190451	0.149519	0.276157	0.335612	0.198721	0.315298	0.380082	9.00899e-05	2.85528e-05	0.02353	0.0502654	0.0460333	0.0122546		0.0291555	0.616127	0.849631	0.380201	0.132083
Bortala Mongolian Autonomous Prefecture	2004	9.19869e-05	0.018725	0.0038789	0.193064	0.138438	0.274268	0.329256	0.209353	0.307251	0.485748	0	0.000936388	0.0302528	0.0476056	0.050268	0.0139702		0.0226959	0.605769	0.845859	0.486684	0.142097
Bortala Mongolian Autonomous Prefecture	2005	0.00028056	0.00992388	0.00470835	0.192798	0.229913	0.2182	0.333858	0.214668	0.312438	0.342342	0.000486895	0.00086867	0.0273626	0.0520663	0.0522623	0.0123293		0.0149128	0.640911	0.860964	0.343698	0.144021
Bortala Mongolian Autonomous Prefecture	2006	0.000257563	0.0151148	0.00655697	0.194772	0.236514	0.222593	0.341948	0.198632	0.322403	0.27036	0	0.00189301	0.0340541	0.0521038	0.0561866	0.0124054		0.0219293	0.653878	0.862983	0.272253	0.15475
Bortala Mongolian Autonomous Prefecture	2007	0.000662306	0.0207998	0.0155385	0.192337	0.219539	0.225726	0.339118	0.16346	0.318867	0.226752	0	0.000835226	0.030567	0.0509537	0.0629643	0.0131314		0.0370006	0.637602	0.821445	0.227588	0.157616
Bortala Mongolian Autonomous Prefecture	2008	0.00250664	0.0031913	0.00428834	0.190217	0.246887	0.221255	0.335141	0.188355	0.313859	0.23247	0.0157722	0.00155691	0.0339598	0.051067	0.0658753	0.0153431		0.00998629	0.658359	0.837355	0.249799	0.166245
Bortala Mongolian Autonomous Prefecture	2009	0.00260783	0.00371122	0.0135563	0.191345	0.237457	0.225139	0.328224	0.202619	0.305891	0.0995944	0.00286234	0.00129878	0.0338656	0.049884	0.0621165	0.0176401		0.0198754	0.653941	0.836734	0.103756	0.163506
Bortala Mongolian Autonomous Prefecture	2010	0.00265382	0.003312	0.0137621	0.195659	0.166729	0.236006	0.3262	0.190393	0.303248	0.0421733	0	0.0154199	0.0428346	0.0454554	0.0746677	0.0155276		0.0197279	0.598394	0.819841	0.0575932	0.178485
Bortala Mongolian Autonomous Prefecture	2011	0.00202371	0.00182788	0.0147726	0.195569	0.194077	0.229878	0.330726	0.188975	0.308681	0.0922717	0	0.0184819	0.0483009	0.0417144	0.112392	0.0176926		0.0186242	0.619524	0.828383	0.110754	0.220099
Bortala Mongolian Autonomous Prefecture	2012	0.00231807	0.00216135	0.0107941	0.195014	0.230856	0.227371	0.333927	0.144943	0.311555	0.112289	0	0.0167477	0.0526519	0.0433827	0.115324	0.0204243		0.0152735	0.65324	0.790426	0.129037	0.231782
Bortala Mongolian Autonomous Prefecture	2013	0.000662306	0.00894103	0.0110631	0.196361	0.265748	0.227566	0.328118	0.166561	0.304697	0.100984	0	0.0139249	0.0561547	0.0396511	0.113678	0.0245747		0.0206664	0.689675	0.799376	0.114909	0.234058
Bortala Mongolian Autonomous Prefecture	2014	8.27882e-05	0.00992427	0.0118507	0.196449	0.294982	0.137971	0.331053	0.162131	0.308255	0.0698406	9.5878e-05	0.0134511	0.0605842	0.0363746	0.113162	0.0282792		0.0218578	0.629403	0.801439	0.0833876	0.2384
Bortala Mongolian Autonomous Prefecture	2015	0.000519726	0.00897462	0.0126075	0.192541	0.3129	0.128693	0.340456	0.211656	0.320174	0.063277	0	0.0178505	0.0609769	0.0372196	0.118003	0.0333937		0.0221018	0.634134	0.872285	0.0811275	0.249594
Bortala Mongolian Autonomous Prefecture	2016	0.00125102	0.00934451	0.0102868	0.104762	0.311957	0.110172	0.339177	0.191633	0.318132	0.0345333	0.00207675	0.0225726	0.0433511	0.0396499	0.0902085	0.0402979		0.0208824	0.526891	0.848943	0.0591827	0.213507
Bortala Mongolian Autonomous Prefecture	2017	0.00123722	0.0022859	0.0102779	0.191174	0.347793	0.107856	0.337958	0.219098	0.316699	0.0413831	0	0.0265059	0.0543616	0.0382648	0.241283	0.0453985		0.013801	0.646823	0.873755	0.067889	0.379307
Bortala Mongolian Autonomous Prefecture	2018	0.00193632	0.00386514	0.0102105	0.191717	0.33459	0.107938	0.340498	0.208614	0.319668	0.036706	0	0.00287508	0.047763	0.0403763	0.258779	0.0498431		0.016012	0.634245	0.868779	0.0395811	0.396761
Bayangol Mongolian Autonomous Prefecture	2000	0.00391404	0.00159431	0.00293366	0.177771	0.356091	0.159133	0.307579	0.185254	0.292844	0.00473976	0	0.0037997	0.0383423	0.0466252	0.0341943	0.0222956		0.00844201	0.692996	0.785678	0.00853946	0.141457
Bayangol Mongolian Autonomous Prefecture	2001	0.00314595	0.00130283	0.00215162	0.183997	0.353922	0.166519	0.273938	0.189861	0.267357	0.00373298	0.00139401	0.000999357	0.0373998	0.0490549	0.0534287	0.023732		0.0066004	0.704439	0.731156	0.00612634	0.163615
Bayangol Mongolian Autonomous Prefecture	2002	0.00566179	0.00880163	0.00325912	0.182822	0.353356	0.17541	0.295041	0.203151	0.28394	0.00334761	0.00281238	0.00104456	0.0297031	0.0543605	0.0679047	0.0252692		0.0177225	0.711589	0.782132	0.00720455	0.177238
Bayangol Mongolian Autonomous Prefecture	2003	0.00522026	0.0456121	0.00814022	0.184332	0.354347	0.173575	0.280825	0.213782	0.258648	0.0020206	0.00526277	0.000898282	0.0336771	0.0530211	0.0768295	0.0199762		0.0589725	0.712253	0.753256	0.00818165	0.183504
Bayangol Mongolian Autonomous Prefecture	2004	0.00691282	0.00266595	0.00349368	0.181794	0.355337	0.172908	0.282602	0.237703	0.271437	0.00196272	0.0015919	0.00243121	0.0340384	0.0532697	0.0850703	0.0266555		0.0130724	0.710039	0.791742	0.00598582	0.199034
Bayangol Mongolian Autonomous Prefecture	2005	0.00665065	0.00133241	0.00351988	0.184737	0.37797	0.167254	0.296528	0.241247	0.284367	0.000895968	0.000165822	0.00189299	0.0367558	0.0592127	0.0913364	0.0164781		0.0115029	0.72996	0.822142	0.00295478	0.203783
Bayangol Mongolian Autonomous Prefecture	2006	0.00459475	0.0036059	0.00418936	0.185304	0.392115	0.159007	0.29322	0.225388	0.280417	0.00236369	0.00219471	0.00134929	0.0388135	0.0557855	0.100914	0.0132851		0.01239	0.736426	0.799026	0.00590769	0.208799
Bayangol Mongolian Autonomous Prefecture	2007	0.00557441	0.00171512	0.00487624	0.188385	0.382685	0.166891	0.298736	0.22953	0.284895	0.00529541	3.85991e-05	0.00164766	0.046683	0.0586015	0.112856	0.0145946		0.0121658	0.737962	0.813161	0.00698166	0.232735
Bayangol Mongolian Autonomous Prefecture	2008	0.00902391	0.112261	0.0274394	0.188599	0.405318	0.162451	0.292929	0.231668	0.282054	0.0072391	0	0.00104574	0.0477982	0.0588238	0.116413	0.0145129		0.148724	0.756368	0.806651	0.00828483	0.237548
Bayangol Mongolian Autonomous Prefecture	2009	0.0140602	0.0965973	0.0192247	0.194049	0.370425	0.094854	0.28698	0.233805	0.273298	0.00207035	0	0.00112631	0.0520393	0.0582296	0.0844944	0.0188125		0.129882	0.659329	0.794083	0.00319665	0.213576
Bayangol Mongolian Autonomous Prefecture	2010	0.0212122	0.118039	0.0278703	0.193522	0.361938	0.188737	0.280387	0.210327	0.267418	0.00168975	0.00341625	0.0019607	0.0597517	0.0629718	0.088765	0.0192449		0.167121	0.744196	0.758132	0.0070667	0.230733
Bayangol Mongolian Autonomous Prefecture	2011	0.0215203	0.117245	0.0314544	0.195607	0.367596	0.164767	0.280261	0.204568	0.26626	0.00176283	0.00365257	0.00257189	0.0566573	0.056218	0.135491	0.0195397		0.17022	0.727971	0.751089	0.00798728	0.267906
Bayangol Mongolian Autonomous Prefecture	2012	0.0223942	0.0739114	0.0365632	0.194995	0.360052	0.184113	0.280599	0.207448	0.264638	0.0015333	0.00364059	0.00475354	0.0576155	0.05634	0.144494	0.0224807		0.132869	0.73916	0.752685	0.00992743	0.280931
Bayangol Mongolian Autonomous Prefecture	2013	0.0272189	0.0848957	0.026913	0.194941	0.357223	0.193784	0.270676	0.19562	0.249991	0.00153089	0.00352554	0.00368953	0.0622963	0.0593792	0.152662	0.0225691		0.139028	0.745948	0.716287	0.00874596	0.296907
Bayangol Mongolian Autonomous Prefecture	2014	0.0261933	0.0519839	0.0288103	0.195121	0.36571	0.195011	0.284656	0.202354	0.265172	0.00159592	0.00295701	0.00241393	0.0664274	0.0584706	0.158272	0.0233023		0.106988	0.755843	0.752182	0.00696687	0.306472
Bayangol Mongolian Autonomous Prefecture	2015	0.0233693	0.0574562	0.0307648	0.192992	0.35628	0.177142	0.29705	0.198987	0.279024	0.0029463	0.00300413	0.00306509	0.0679511	0.0566033	0.161093	0.0309599		0.11159	0.726414	0.775061	0.00901552	0.316607
Bayangol Mongolian Autonomous Prefecture	2016	0.0201957	0.0676716	0.0256169	0.133785	0.313843	0.202151	0.30072	0.20067	0.279712	0.00385089	0	0.00419785	0.0648605	0.0663051	0.162458	0.0408551		0.113484	0.649779	0.781102	0.00804874	0.334478
Bayangol Mongolian Autonomous Prefecture	2017	0.0277754	0.0799306	0.0192315	0.1925	0.348736	0.208975	0.295468	0.199829	0.270068	0.00346442	0.00343851	0.00536798	0.0747251	0.0750285	0.303169	0.0444741		0.126938	0.750211	0.765364	0.0122709	0.497397
Bayangol Mongolian Autonomous Prefecture	2018	0.0299969	0.0677202	0.0204301	0.192282	0.378913	0.199792	0.294286	0.200249	0.269928	0.00193013	0	0.000454619	0.0848206	0.0799582	0.332491	0.0481814		0.118147	0.770987	0.764463	0.00238475	0.545452
Aksu Administrative Offices	2000	0.00579517	0.0065202	0.00312827	0.150188	0.0864766	0.212329	0.332427	0.212542	0.314922	0.000121427	0.00162086	0.000315906	0.0114823	0.0384518	0.0308858	0.00595374		0.0154436	0.448994	0.859892	0.00205819	0.0867735
Aksu Administrative Offices	2001	0.0084306	0.00410151	0.00201246	0.165928	0.12052	0.213642	0.325793	0.221756	0.310526	0.000979806	0	0.00383199	0.0125818	0.0443843	0.0766984	0.00663784		0.0145446	0.50009	0.858075	0.0048118	0.140302
Aksu Administrative Offices	2002	0.00610333	0.00495949	0.00299329	0.15314	0.131648	0.219611	0.311289	0.21644	0.29849	0	0.000155533	0.00287761	0.0117964	0.0434606	0.0313237	0.00736619		0.0140561	0.504399	0.826219	0.00303314	0.0939469
Aksu Administrative Offices	2003	0.00695881	0.00589639	0.00338702	0.170443	0.148246	0.212834	0.312036	0.224414	0.2985	7.95353e-05	0.0153272	0.00114327	0.0119221	0.0465013	0.0362977	0.00784475		0.0162422	0.531523	0.83495	0.0165501	0.102566
Aksu Administrative Offices	2004	0.00959883	0.00355966	0.00356499	0.177011	0.164843	0.223463	0.306302	0.231502	0.291819	0.0003305	0.00631672	0.00825656	0.0114351	0.0508269	0.0405959	0.0108573		0.0167235	0.565317	0.829622	0.0149038	0.113715
Aksu Administrative Offices	2005	0.00620912	0.0025897	0.0055149	0.175171	0.147868	0.229757	0.263471	0.235931	0.254563	0.00133081	0	0.00510449	0.0110582	0.0520109	0.0414437	0.0128762		0.0143137	0.552797	0.753965	0.0064353	0.117389
Aksu Administrative Offices	2006	0.00718878	0.0109079	0.00833375	0.177071	0.158242	0.22775	0.250529	0.240981	0.242643	0.00111618	0.000527384	0.00118283	0.0150165	0.052011	0.0409229	0.0124872		0.0264304	0.563062	0.734153	0.00282639	0.120438
Aksu Administrative Offices	2007	0.00240086	0.0242196	0.00452087	0.167867	0.175217	0.224105	0.243045	0.233274	0.234552	0.00114403	0	0.000424977	0.0252264	0.0534723	0.0415814	0.0137854		0.0311414	0.567188	0.71087	0.00156901	0.134066
Aksu Administrative Offices	2008	0.00608033	0.00845593	0.00600619	0.160686	0.197849	0.24544	0.260022	0.256486	0.249611	0.00284077	0.00105246	0.000599879	0.0242997	0.0513026	0.042835	0.0163709		0.0205424	0.603975	0.766119	0.0044931	0.134808
Aksu Administrative Offices	2009	0.0161575	0.0453825	0.00987303	0.166624	0.198793	0.227576	0.253918	0.259498	0.242085	0.00397551	0	0.000476677	0.0304727	0.0471526	0.103606	0.0181467		0.0714131	0.592993	0.755501	0.00445219	0.199378
Aksu Administrative Offices	2010	0.0200669	0.0338929	0.00758058	0.173243	0.193134	0.220315	0.248741	0.253739	0.237665	0.00598882	0	0.00350417	0.0364573	0.0435901	0.10291	0.0156395		0.0615405	0.586692	0.740145	0.00949298	0.198597
Aksu Administrative Offices	2011	0.015256	0.0323923	0.00707043	0.165809	0.220482	0.219859	0.227728	0.244525	0.219515	0.00549229	0.00136944	0.00223876	0.0404785	0.0410003	0.112702	0.0176668		0.0547188	0.60615	0.691769	0.00910049	0.211847
Aksu Administrative Offices	2012	0.0169164	0.0172355	0.00793369	0.167199	0.226141	0.224927	0.230671	0.24798	0.219868	0.00763654	0.00551832	0.00221287	0.0431174	0.0401889	0.113506	0.0200869		0.0420856	0.618267	0.69852	0.0153677	0.2169
Aksu Administrative Offices	2013	0.0247629	0.0211046	0.00809468	0.170435	0.221425	0.234452	0.227152	0.178787	0.211991	0.00699342	0.0055765	0.0016217	0.0486307	0.0412722	0.112331	0.0244045		0.0539622	0.626312	0.61793	0.0141916	0.226638
Aksu Administrative Offices	2014	0.0143913	0.0456307	0.00881693	0.171819	0.244058	0.228863	0.225934	0.196683	0.205946	0.00617747	0.0049727	0.000720885	0.0481438	0.0362972	0.109244	0.0272704		0.068839	0.64474	0.628564	0.0118711	0.220956
Aksu Administrative Offices	2015	0.0148237	0.0364669	0.0094842	0.173992	0.245944	0.232581	0.258241	0.187735	0.244047	0.00287377	0.000805142	0.000683572	0.0502957	0.0379135	0.0536072	0.0284801		0.0607748	0.652517	0.690023	0.00436248	0.170297
Aksu Administrative Offices	2016	0.0164197	0.0313722	0.0082425	0.12862	0.244058	0.23021	0.274874	0.204524	0.262298	0.0017173	0.00310601	0.000828199	0.0444182	0.0393961	0.0678953	0.0346888		0.0560344	0.602888	0.741696	0.00565151	0.186398
Aksu Administrative Offices	2017	0.0274535	0.0122274	0.00540176	0.169665	0.289324	0.21927	0.272834	0.221313	0.259154	0.00307424	0	0.000835786	0.0521299	0.0461742	0.308938	0.0371303		0.0450827	0.678259	0.7533	0.00391003	0.444373
Aksu Administrative Offices	2018	0.0402029	0.0135379	0.00628681	0.169583	0.283666	0.215624	0.274193	0.212919	0.260599	0.0024598	0	0.000750914	0.0528649	0.0533534	0.341001	0.0374272		0.0600275	0.668873	0.74771	0.00321071	0.484646
Kizilsu Kirgiz Autonomous Prefecture	2000	0.00115444	0	0	0.110628	0.135232	0.25182	0.331643	0.073712	0.311906	0.0398424	0	0.000205664	0.0174511	0.0377338	0.0372902	0.00241545		0.00115444	0.49768	0.717261	0.0400481	0.0948906
Kizilsu Kirgiz Autonomous Prefecture	2001	0.00136141	0	0	0.168011	0.206243	0.254056	0.352673	0.0516515	0.33491	0.0206254	0	0.0609375	0.0155662	0.0461139	0.0391231	0.00257223		0.00136141	0.628309	0.739234	0.0815628	0.103376
Kizilsu Kirgiz Autonomous Prefecture	2002	0.0020789	0	0	0.0780594	0.215484	0.250121	0.351189	0.0897479	0.333044	0.0120813	0	0.0540817	0.0113252	0.0505017	0.0606319	0.00286892		0.0020789	0.543665	0.773981	0.066163	0.125328
Kizilsu Kirgiz Autonomous Prefecture	2003	0.00241926	0	0	0.131478	0.226471	0.256143	0.352559	0.0915198	0.334775	0.0197326	0	0.0093623	0.0137127	0.0562569	0.0512941	0.00319465		0.00241926	0.614091	0.778854	0.0290949	0.124458
Kizilsu Kirgiz Autonomous Prefecture	2004	0.00247905	0	0	0.131749	0.237457	0.260651	0.346734	0.0977215	0.327573	0.0437986	0.000211533	0.00235591	0.0115294	0.0582934	0.0572061	0.00450018		0.00247905	0.629856	0.772029	0.046366	0.131529
Kizilsu Kirgiz Autonomous Prefecture	2005	0.00109924	0	0	0.132299	0.236514	0.261576	0.360379	0.118985	0.34371	0.0525186	0	0.0113981	0.0117336	0.0590543	0.0601138	0.00355062		0.00109924	0.630389	0.823074	0.0639167	0.134452
Kizilsu Kirgiz Autonomous Prefecture	2006	0.000809485	0	0	0.127138	0.264805	0.263825	0.359749	0.128376	0.342998	0.0638809	0	0.0284298	0.0168071	0.0619481	0.0581107	0.00415265		0.000809485	0.655769	0.831122	0.0923108	0.141019
Kizilsu Kirgiz Autonomous Prefecture	2007	0.000777289	0.000892681	0	0.121285	0.282723	0.23693	0.359335	0.118985	0.342159	0.135818	0.00428689	0.0232336	0.0278496	0.0545577	0.0593149	0.00462122		0.00166997	0.640938	0.820478	0.163338	0.146343
Kizilsu Kirgiz Autonomous Prefecture	2008	0.000528925	0.0013003	0.000454729	0.11826	0.296868	0.258559	0.358307	0.137324	0.340242	0.117899	0.161908	0.0457462	0.0321849	0.0407868	0.0611163	0.00540435		0.00228396	0.673687	0.835873	0.325553	0.139492
Kizilsu Kirgiz Autonomous Prefecture	2009	0.000183974	0.0512531	0.00674477	0.112382	0.306299	0.245243	0.356544	0.148044	0.339402	0.0423033	0.00886321	0.0372167	0.0412482	0.0410248	0.137231	0.00588485		0.0581819	0.663924	0.843989	0.0883832	0.225389
Kizilsu Kirgiz Autonomous Prefecture	2010	0.000745094	0.0339837	0.00530362	0.10059	0.331761	0.238413	0.338994	0.10915	0.320917	0.0239963	0.0279351	0.159893	0.0472013	0.039198	0.136048	0.00679393		0.0400324	0.670764	0.769062	0.211824	0.229242
Kizilsu Kirgiz Autonomous Prefecture	2011	0.000358749	0.0352916	0.00651185	0.105727	0.34402	0.23516	0.330704	0.112783	0.313109	0.0280429	0.01628	0.0528181	0.0520864	0.0338411	0.147058	0.0072761		0.0421622	0.684907	0.756596	0.0971409	0.240261
Kizilsu Kirgiz Autonomous Prefecture	2012	0.00125562	0.0236688	0.00551358	0.0900539	0.360052	0.235075	0.328023	0.10915	0.305279	0.0361645	0.000208362	0.0448151	0.052966	0.0356686	0.155663	0.00829969		0.030438	0.685181	0.742453	0.0811879	0.252597
Kizilsu Kirgiz Autonomous Prefecture	2013	0.0020927	0.0200208	0.003742	0.107128	0.371369	0.21887	0.320397	0.168155	0.296541	0.0461091	0	0.0465863	0.0479082	0.0382851	0.15559	0.00928932		0.0258555	0.697367	0.785093	0.0926953	0.251073
Kizilsu Kirgiz Autonomous Prefecture	2014	0.00310916	0.0130055	0.0025074	0.121128	0.382685	0.213064	0.33368	0.155929	0.313031	0.0501262	0.0115584	0.0277663	0.0489606	0.040635	0.150689	0.0108983		0.0186221	0.716877	0.80264	0.0894508	0.251183
Kizilsu Kirgiz Autonomous Prefecture	2015	0.00270441	0.0127395	0.00137551	0.117123	0.3874	0.216024	0.341806	0.165808	0.317293	0.0235365	0.0064984	0.0256178	0.0561704	0.0370889	0.146278	0.0126643		0.0168195	0.720547	0.824906	0.0556527	0.252202
Kizilsu Kirgiz Autonomous Prefecture	2016	0.001389	0.0138342	0.00201194	0.183997	0.379856	0.218398	0.338074	0.175686	0.30818	0.0270717	0.00174529	0.0294559	0.0677333	0.0375131	0.0695342	0.0152768		0.0172352	0.782251	0.821939	0.0582729	0.190057
Kizilsu Kirgiz Autonomous Prefecture	2017	0.00330233	0.00987112	0.00126987	0.119718	0.410033	0.183798	0.337084	0.183037	0.311242	0.0303589	0.000156381	0.0255811	0.061307	0.0413393	0.35086	0.0149397		0.0144433	0.713549	0.831363	0.0560964	0.468446
Kizilsu Kirgiz Autonomous Prefecture	2018	0.00198692	0.00965693	0.00154302	0.138882	0.407204	0.179989	0.346534	0.192401	0.324052	0.0111311	0.000150435	0.00414813	0.0635862	0.0427932	0.39362	0.0156613		0.0131869	0.726075	0.862986	0.0154297	0.51566
Kashgar Administrative Offices	2000	0.0109234	4.77038e-05	0	0.125947	0.0097133	0.228532	0.349906	0.0762812	0.333238	0.00941445	0.000301455	0.0924448	0.000172784	0.0348677	0.112956	0.00211987		0.0109711	0.364192	0.759425	0.102161	0.150117
Kashgar Administrative Offices	2001	0.0108361	0.000128097	6.91674e-05	0.10364	0.0270652	0.233139	0.353075	0.157967	0.335893	0.00282456	0.000825535	0.0521368	0.000486936	0.0403041	0.0248732	0.0023655		0.0110333	0.363844	0.846935	0.0557869	0.0680298
Kashgar Administrative Offices	2002	0.0204257	0.000114526	5.92858e-05	0.100132	0.0407393	0.227313	0.349813	0.149993	0.332438	0.00174731	0.000246026	0.0349328	0.000172784	0.0460768	0.0236728	0.00261119		0.0205995	0.368184	0.832244	0.0369261	0.0725337
Kashgar Administrative Offices	2003	0.025347	0.00072882	0.000796639	0.109124	0.072614	0.226894	0.349692	0.18366	0.331872	0.00343699	0.00115333	0.0257376	0	0.0511144	0.0302527	0.00358831		0.0268724	0.408632	0.865224	0.0303279	0.0849554
Kashgar Administrative Offices	2004	0.0220631	0.00151333	0.000738545	0.110726	0.104489	0.22223	0.349003	0.112517	0.330625	0.00604992	0.0016355	0.0722043	0.00138227	0.0534729	0.0317352	0.00451166		0.0243149	0.437445	0.792145	0.0798898	0.091102
Kashgar Administrative Offices	2005	0.016576	0.00112968	0.000820728	0.113329	0.110618	0.218907	0.346106	0.11358	0.32721	0.0088557	8.82195e-05	0.018271	0.00190062	0.0519825	0.0314294	0.0057102		0.0185264	0.442854	0.786896	0.027215	0.0910227
Kashgar Administrative Offices	2006	0.0181076	0.00101587	0.000335814	0.113634	0.116748	0.21954	0.347383	0.11358	0.328771	0.0316824	0.000497896	0.0284339	0.00267029	0.058731	0.0325365	0.00717373		0.0194593	0.449922	0.789734	0.0606142	0.101112
Kashgar Administrative Offices	2007	0.0187331	0.0159657	0.00206145	0.129562	0.122878	0.222014	0.346247	0.11358	0.327433	0.0620004	0.00185887	0.0281484	0.011121	0.0626272	0.0330761	0.00920661		0.0367603	0.474455	0.78726	0.0920077	0.116031
Kashgar Administrative Offices	2008	0.0206833	0.0104792	0.00394948	0.123352	0.129008	0.222805	0.346747	0.135552	0.327931	0.0743814	0	0.0179373	0.0129274	0.0568131	0.0399593	0.010593		0.0351119	0.475165	0.81023	0.0923187	0.120293
Kashgar Administrative Offices	2009	0.0426819	0.0472391	0.00158166	0.130722	0.138438	0.219956	0.346659	0.173914	0.328049	0.0282358	0	0.0149889	0.0191162	0.0557	0.0430321	0.0132086		0.0915027	0.489116	0.848622	0.0432247	0.131057
Kashgar Administrative Offices	2010	0.0437444	0.0359395	0.00349932	0.124371	0.123349	0.235948	0.349635	0.17294	0.331543	0.0225538	0.000637129	0.03161	0.0280224	0.0522203	0.105614	0.0116681		0.0831832	0.483668	0.854117	0.0548009	0.197525
Kashgar Administrative Offices	2011	0.0317861	0.0384549	0.0036174	0.142896	0.182761	0.228015	0.34822	0.150613	0.329988	0.0207668	0	0.0294546	0.0331116	0.0449834	0.127339	0.0152932		0.0738583	0.553672	0.828821	0.0502213	0.220727
Kashgar Administrative Offices	2012	0.0450414	0.026098	0.00226521	0.148968	0.201622	0.225737	0.348827	0.162574	0.330475	0.0177126	0.0015195	0.0208133	0.0331587	0.048219	0.138879	0.017922		0.0734046	0.576327	0.841876	0.0400454	0.238179
Kashgar Administrative Offices	2013	0.0488404	0.0226877	0.00261365	0.159705	0.22897	0.22636	0.349558	0.13976	0.33104	0.0270462	0.000522008	0.0109575	0.0355777	0.0500473	0.139033	0.0222969		0.0741418	0.615035	0.820358	0.0385257	0.246955
Kashgar Administrative Offices	2014	0.0468075	0.0205382	0.00248869	0.162346	0.2384	0.223398	0.353191	0.116947	0.335188	0.0229626	0.000511455	0.0031385	0.0354521	0.0481068	0.136773	0.0222509		0.0698344	0.624145	0.805326	0.0266126	0.242583
Kashgar Administrative Offices	2015	0.0426175	0.0187714	0.00237469	0.159579	0.246887	0.232084	0.350786	0.118453	0.332697	0.0168487	0.00147353	0.00327223	0.0444682	0.0464695	0.140444	0.0241896		0.0637636	0.638551	0.801935	0.0215945	0.255571
Kashgar Administrative Offices	2016	0.0426405	0.019937	0.00230444	0.203127	0.198793	0.247136	0.352373	0.131299	0.334802	0.0335595	0	0.00401914	0.0514644	0.0494528	0.138051	0.0292714		0.064882	0.649055	0.818475	0.0375786	0.268239
Kashgar Administrative Offices	2017	0.0765699	0.0168628	0.00239823	0.154925	0.224255	0.243218	0.352468	0.124876	0.334969	0.0338257	2.36466e-05	0.00624754	0.0546283	0.0599788	0.395824	0.0296033		0.095831	0.622397	0.812314	0.0400969	0.540034
Kashgar Administrative Offices	2018	0.0733503	0.016716	0.00227066	0.155443	0.223311	0.243091	0.353116	0.128088	0.335581	0.0163188	0.000251871	0.000535822	0.0548068	0.0648902	0.402146	0.0319503		0.092337	0.621846	0.816785	0.0171065	0.553793
Hotan Administrative Offices	2000	0.00616312	0.00195078	0.000198259	0.0565655	0	0.239906	0.338848	0.149107	0.32086	0.0144265	0	0.00476966	0.00315723	0.0309017	0	0.000107739		0.00831216	0.296472	0.808815	0.0191961	0.0341667
Hotan Administrative Offices	2001	0.00581357	0.00215162	0.000493358	0.00823363	0.0194266	0.253294	0.346291	0.149107	0.328206	0.0146522	0	0.00901072	0.0033143	0.0343652	0.0373573	1.37178e-05		0.00845855	0.280955	0.823605	0.023663	0.0750505
Hotan Administrative Offices	2002	0.00697261	0.00125807	3.40345e-05	0	0.03725	0.255107	0.347962	0.126958	0.329316	0.00609294	0	0.00678345	0.00457091	0.035851	0.00143121	2.22909e-05		0.00826471	0.292357	0.804235	0.0128764	0.0418754
Hotan Administrative Offices	2003	0.00990239	0.00400423	0.000727866	0.0389309	0.062382	0.244531	0.350088	0.0791163	0.331945	9.53922e-05	0	0.00186886	0.00667573	0.0336409	0.0207163	0		0.0146345	0.345844	0.761149	0.00196425	0.0610329
Hotan Administrative Offices	2004	0.0151088	0.00098496	3.49514e-05	0.0461202	0.087514	0.237866	0.349113	0.0869128	0.33087	0.00242172	0	0.0208715	0.00494789	0.0387716	0.0213106	0.00300845		0.0161288	0.3715	0.766896	0.0232932	0.0680385
Hotan Administrative Offices	2005	0.00789707	0.00551087	0.000163317	0.0593114	0.0950583	0.227501	0.35069	0.0895707	0.332647	0.000930987	0	0.0514417	0.00720979	0.0367481	0.0236849	0.00161271		0.0135713	0.381871	0.772907	0.0523727	0.0692555
Hotan Administrative Offices	2006	0.00753373	0.00745863	0.000645808	0.0646326	0.141267	0.222234	0.350328	0.103746	0.332088	0.000522476	0	0.0143234	0.0114665	0.0355658	0.0248334	0.00255567		0.0156382	0.428134	0.786162	0.0148459	0.0744214
Hotan Administrative Offices	2007	0.00647128	0.351209	0.00784752	0.0680962	0.143153	0.220325	0.347177	0.0925829	0.328531	0.000880664	0	0.0146454	0.00747682	0.0378225	0.0250704	0.00318587		0.365528	0.431574	0.768291	0.0155261	0.0735557
Hotan Administrative Offices	2008	0.00935967	0.00693083	0.000998216	0.0809913	0.15447	0.215039	0.348832	0.0950636	0.330133	0.00652893	0	0.0157155	0.0178281	0.0409185	0.0271039	0.00366488		0.0172887	0.4505	0.774028	0.0222444	0.0895154
Hotan Administrative Offices	2009	0.0118709	0.0122116	0.00211191	0.0886314	0.182761	0.216215	0.348258	0.0955066	0.328466	4.77595e-05	0	0.0127507	0.0343682	0.0401174	0.0718006	0.00385633		0.0261944	0.487607	0.77223	0.0127984	0.150143
Hotan Administrative Offices	2010	0.0183054	0.0109512	0.00185191	0.100559	0.190305	0.216416	0.349827	0.0845207	0.330263	0.000603919	0	0.0206162	0.0429132	0.036442	0.076521	0.00400963		0.0311085	0.50728	0.76461	0.0212202	0.159886
Hotan Administrative Offices	2011	0.0165944	0.00933227	0.00156719	0.117537	0.218596	0.227273	0.35241	0.0801795	0.333049	0.000275678	0.00041913	0.0278335	0.045395	0.0325246	0.139365	0.00415761		0.0274939	0.563407	0.765639	0.0285283	0.221442
Hotan Administrative Offices	2012	0.0433396	0.00839764	0.00133631	0.120674	0.22897	0.223396	0.353702	0.0709655	0.333938	0.000394689	0	0.0210866	0.0502172	0.0389433	0.140211	0.00460272		0.0530736	0.57304	0.758605	0.0214813	0.233974
Hotan Administrative Offices	2013	0.0475204	0.0071996	0.000898065	0.130616	0.229913	0.225852	0.34989	0.0629918	0.329325	0.000588194	0	0.0062898	0.0540499	0.0392438	0.13984	0.00493053		0.0556181	0.586381	0.742207	0.00687799	0.238064
Hotan Administrative Offices	2014	0.0319746	0.00538007	0.0007293	0.132772	0.243115	0.204639	0.351967	0.0629918	0.332033	0.000417003	0	0.00195739	0.0532331	0.0310225	0.133104	0.00534021		0.038084	0.580526	0.746992	0.0023744	0.222699
Hotan Administrative Offices	2015	0.0390668	0.0047202	0.000569655	0.136622	0.268577	0.204004	0.35209	0.0459814	0.3276	0.00032493	0.0108607	0.00186677	0.0560133	0.0297945	0.126064	0.00551671		0.0443567	0.609203	0.725671	0.0130524	0.217389
Hotan Administrative Offices	2016	0.0357461	0.0048323	0.00115274	0.175077	0.262919	0.201954	0.349321	0	0.330679	0.000680165	0.000859279	0.00230692	0.0990712	0.0281648	0.0346713	0.00630679		0.0417311	0.63995	0.680001	0.00384636	0.168214
Hotan Administrative Offices	2017	0.0497281	0.00247789	0.000258475	0.136368	0.311014	0.198545	0.351331	0.0365902	0.332877	0.000311476	0	0.00263085	0.0685071	0.0335637	0.320709	0.00671185		0.0524645	0.645928	0.720798	0.00294233	0.429492
Hotan Administrative Offices	2018	0.0529661	0.00250899	0.000513701	0.137156	0.309128	0.193688	0.349654	0.0182951	0.330926	0.000945319	0	0.000425965	0.0708885	0.0371412	0.345247	0.00659649		0.0559887	0.639973	0.698875	0.00137128	0.459873

## Sheet: results
name	year	Innovation development	Coordinated development	Green development	Open development	Shared developmen
Urumqi City	2000	0.214186	0.933032	0.44677	0.143898	0.248495
Urumqi City	2001	0.211363	0.885048	0.478585	0.130389	0.310222
Urumqi City	2002	0.258719	0.903906	0.507837	0.125837	0.375859
Urumqi City	2003	0.280701	0.905317	0.489441	0.0662991	0.430746
Urumqi City	2004	0.283718	0.90819	0.507907	0.0893603	0.475578
Urumqi City	2005	0.284034	0.890155	0.510404	0.102854	0.466075
Urumqi City	2006	0.287233	0.898428	0.481109	0.11436	0.480592
Urumqi City	2007	0.296976	0.889871	0.537357	0.11861	0.497693
Urumqi City	2008	0.401931	0.878519	0.527563	0.0831472	0.529959
Urumqi City	2009	0.508644	0.941496	0.632533	0.0774389	0.578892
Urumqi City	2010	0.535305	0.93377	0.638732	0.0987515	0.566865
Urumqi City	2011	0.503726	0.886449	0.650311	0.0864386	0.637934
Urumqi City	2012	0.544976	0.877659	0.68948	0.0879978	0.640968
Urumqi City	2013	0.576735	0.878101	0.731764	0.0705412	0.66298
Urumqi City	2014	0.578083	0.871273	0.745328	0.0549988	0.68761
Urumqi City	2015	0.553531	0.875865	0.795685	0.0517057	0.698347
Urumqi City	2016	0.575152	0.866133	0.823765	0.0745927	0.728503
Urumqi City	2017	0.522717	0.865159	0.819517	0.0804062	0.932643
Urumqi City	2018	0.535535	0.87319	0.824855	0.0449052	0.968733
Karamay City	2000	0.422872	0.874964	0.187389	0.00415158	0.443441
Karamay City	2001	0.366709	0.753499	0.317592	0.00381458	0.527852
Karamay City	2002	0.374805	0.856051	0.257422	0.00338132	0.370678
Karamay City	2003	0.328294	0.870099	0.271493	0.00402408	0.486384
Karamay City	2004	0.453643	0.819615	0.26129	0.00264871	0.483374
Karamay City	2005	0.536385	0.760646	0.252204	0.00261098	0.471597
Karamay City	2006	0.460841	0.75147	0.357494	0.00177785	0.471344
Karamay City	2007	0.480306	0.740989	0.428742	0.00242692	0.432281
Karamay City	2008	0.366035	0.733228	0.438133	0.00182667	0.44457
Karamay City	2009	0.580014	0.77962	0.391984	0.00357702	0.487369
Karamay City	2010	0.474049	0.773456	0.341206	0.00376019	0.46141
Karamay City	2011	0.462805	0.763595	0.330134	0.00743581	0.499847
Karamay City	2012	0.4669	0.747623	0.342946	0.00543289	0.543732
Karamay City	2013	0.341333	0.743044	0.334208	0.0105008	0.570359
Karamay City	2014	0.424269	0.713193	0.307883	0.0058843	0.576904
Karamay City	2015	0.42415	0.768716	0.396707	0.00301933	0.598156
Karamay City	2016	0.327726	0.730459	0.373881	0.0504382	0.569553
Karamay City	2017	0.335729	0.741206	0.422322	0.00348106	0.597192
Karamay City	2018	0.290562	0.743865	0.453468	0.00306738	0.630136
Turpan City	2000	0.015376	0.709185	0.764355	0.054062	0.100767
Turpan City	2001	0.0157387	0.732666	0.804529	0.0437794	0.100557
Turpan City	2002	0.0206688	0.743531	0.881877	0.0334588	0.122032
Turpan City	2003	0.0192386	0.741785	0.920517	0.0147227	0.113832
Turpan City	2004	0.00753105	0.751963	0.897924	0.0519314	0.115943
Turpan City	2005	0.0058322	0.754768	0.886357	0.0307978	0.115448
Turpan City	2006	0.0379824	0.768634	0.68903	0.0324763	0.120187
Turpan City	2007	0.0591793	0.771926	0.720552	0.0598907	0.110014
Turpan City	2008	0.0478918	0.7761	0.693445	0.0202317	0.114307
Turpan City	2009	0.244436	0.793419	0.680532	0.0250395	0.178537
Turpan City	2010	0.194229	0.787424	0.562288	0.0782404	0.190974
Turpan City	2011	0.200744	0.784973	0.466823	0.0636584	0.220791
Turpan City	2012	0.28772	0.77587	0.422649	0.0510774	0.248642
Turpan City	2013	0.288838	0.764507	0.542574	0.0230728	0.254278
Turpan City	2014	0.243334	0.768338	0.604869	0.0172077	0.261141
Turpan City	2015	0.246098	0.760979	0.700413	0.0239228	0.267151
Turpan City	2016	0.196993	0.745243	0.656646	0.0236057	0.272243
Turpan City	2017	0.129999	0.774805	0.545904	0.0241871	0.481381
Turpan City	2018	0.0857062	0.782892	0.55803	0.022606	0.528974
Hami City	2000	0.0114756	0.701676	0.750952	0.0179038	0.171655
Hami City	2001	0.0133875	0.777216	0.757288	0.0190726	0.179023
Hami City	2002	0.0147327	0.74743	0.755753	0.0120615	0.17874
Hami City	2003	0.0133086	0.755075	0.754978	0.011685	0.180696
Hami City	2004	0.00932234	0.757848	0.740441	0.0142495	0.212324
Hami City	2005	0.00435843	0.759295	0.712296	0.0290605	0.214678
Hami City	2006	0.00798223	0.764262	0.699905	0.0402453	0.243341
Hami City	2007	0.0104338	0.765018	0.741899	0.0239915	0.251233
Hami City	2008	0.0096355	0.712394	0.772327	0.0397099	0.25659
Hami City	2009	0.046366	0.777071	0.747056	0.0206599	0.226946
Hami City	2010	0.0360017	0.791417	0.747768	0.0379881	0.242693
Hami City	2011	0.0379285	0.801387	0.748898	0.0273544	0.29123
Hami City	2012	0.0337284	0.788524	0.71652	0.0262479	0.304972
Hami City	2013	0.0383732	0.778469	0.549662	0.0184714	0.318303
Hami City	2014	0.0303942	0.775543	0.3016	0.0172758	0.329231
Hami City	2015	0.0401744	0.78187	0.474233	0.0235046	0.353479
Hami City	2016	0.0537425	0.771964	0.443157	0.0192721	0.339376
Hami City	2017	0.038335	0.781044	0.514231	0.00872869	0.487943
Hami City	2018	0.042717	0.780419	0.41819	0.00353171	0.504117
Changji Hui Autonomous Prefecture	2000	0.0171848	0.601782	0.706946	0.0221937	0.150685
Changji Hui Autonomous Prefecture	2001	0.0171959	0.63697	0.687341	0.010781	0.118956
Changji Hui Autonomous Prefecture	2002	0.0135384	0.63884	0.739432	0.0169923	0.150901
Changji Hui Autonomous Prefecture	2003	0.024406	0.65843	0.755538	0.0343484	0.151999
Changji Hui Autonomous Prefecture	2004	0.0205661	0.664403	0.733815	0.0192578	0.185398
Changji Hui Autonomous Prefecture	2005	0.0217395	0.648306	0.767825	0.0349366	0.191763
Changji Hui Autonomous Prefecture	2006	0.147707	0.662527	0.74722	0.0503956	0.200627
Changji Hui Autonomous Prefecture	2007	0.0916812	0.638953	0.766369	0.0811195	0.23163
Changji Hui Autonomous Prefecture	2008	0.0802039	0.654354	0.769343	0.105692	0.262741
Changji Hui Autonomous Prefecture	2009	0.100708	0.664551	0.744031	0.0549656	0.335026
Changji Hui Autonomous Prefecture	2010	0.123238	0.671382	0.71041	0.0395513	0.34825
Changji Hui Autonomous Prefecture	2011	0.147334	0.701774	0.641966	0.0328731	0.355623
Changji Hui Autonomous Prefecture	2012	0.170332	0.7104	0.682429	0.0298889	0.375987
Changji Hui Autonomous Prefecture	2013	0.180578	0.732408	0.600372	0.0210734	0.39745
Changji Hui Autonomous Prefecture	2014	0.127325	0.744534	0.562312	0.0190627	0.413711
Changji Hui Autonomous Prefecture	2015	0.139541	0.75595	0.54918	0.0162315	0.443116
Changji Hui Autonomous Prefecture	2016	0.149657	0.77285	0.542422	0.0136017	0.397952
Changji Hui Autonomous Prefecture	2017	0.198926	0.789402	0.569326	0.00862455	0.566472
Changji Hui Autonomous Prefecture	2018	0.174333	0.782378	0.581011	0.0102246	0.585676
Counties (Cities) Direct Under Ili Prefecture	2000	0.0331939	0.523666	0.897051	0.0558306	0.108128
Counties (Cities) Direct Under Ili Prefecture	2001	0.0265132	0.556706	0.778104	0.0302279	0.0702381
Counties (Cities) Direct Under Ili Prefecture	2002	0.0272145	0.586076	0.844118	0.0349062	0.116047
Counties (Cities) Direct Under Ili Prefecture	2003	0.0338654	0.607922	0.859793	0.0844947	0.119419
Counties (Cities) Direct Under Ili Prefecture	2004	0.0338263	0.627393	0.853782	0.0955669	0.12593
Counties (Cities) Direct Under Ili Prefecture	2005	0.0473002	0.630111	0.829742	0.148943	0.130632
Counties (Cities) Direct Under Ili Prefecture	2006	0.0339406	0.643312	0.806314	0.13146	0.137247
Counties (Cities) Direct Under Ili Prefecture	2007	0.0335581	0.638724	0.811472	0.119529	0.146947
Counties (Cities) Direct Under Ili Prefecture	2008	0.0398142	0.653418	0.797565	0.216096	0.155867
Counties (Cities) Direct Under Ili Prefecture	2009	0.0685213	0.641476	0.790666	0.12067	0.149054
Counties (Cities) Direct Under Ili Prefecture	2010	0.0658906	0.645867	0.770181	0.166561	0.161252
Counties (Cities) Direct Under Ili Prefecture	2011	0.057726	0.652411	0.779672	0.221593	0.206465
Counties (Cities) Direct Under Ili Prefecture	2012	0.074093	0.649043	0.781001	0.203906	0.218752
Counties (Cities) Direct Under Ili Prefecture	2013	0.11442	0.653223	0.744629	0.212477	0.223213
Counties (Cities) Direct Under Ili Prefecture	2014	0.0772468	0.666373	0.734446	0.200871	0.227783
Counties (Cities) Direct Under Ili Prefecture	2015	0.0892081	0.677863	0.782528	0.176045	0.238109
Counties (Cities) Direct Under Ili Prefecture	2016	0.106767	0.685979	0.779868	0.235645	0.193276
Counties (Cities) Direct Under Ili Prefecture	2017	0.0837658	0.705833	0.771081	0.2618	0.380591
Counties (Cities) Direct Under Ili Prefecture	2018	0.0887802	0.687204	0.787555	0.406166	0.437619
Tarbagatai Administrative Offices	2000	0.00629208	0.595427	0.83582	0.0290017	0.152309
Tarbagatai Administrative Offices	2001	0.00411932	0.611096	0.835643	0.0263187	0.232674
Tarbagatai Administrative Offices	2002	0.00435577	0.616543	0.817346	0.0210728	0.168179
Tarbagatai Administrative Offices	2003	0.00421367	0.62832	0.841322	0.0678574	0.131521
Tarbagatai Administrative Offices	2004	0.0018959	0.609786	0.840269	0.0418251	0.135884
Tarbagatai Administrative Offices	2005	0.00616284	0.568603	0.846763	0.0523247	0.133979
Tarbagatai Administrative Offices	2006	0.00125862	0.595837	0.806421	0.0417922	0.140394
Tarbagatai Administrative Offices	2007	0.00203444	0.628196	0.857762	0.0414194	0.137906
Tarbagatai Administrative Offices	2008	0.0042058	0.639784	0.886366	0.0376621	0.142693
Tarbagatai Administrative Offices	2009	0.0531992	0.613604	0.895986	0.0287374	0.198885
Tarbagatai Administrative Offices	2010	0.0382417	0.616351	0.877507	0.0229398	0.191672
Tarbagatai Administrative Offices	2011	0.0423897	0.640243	0.878683	0.0162155	0.21151
Tarbagatai Administrative Offices	2012	0.011673	0.627484	0.873646	0.014107	0.222527
Tarbagatai Administrative Offices	2013	0.0157584	0.643868	0.89077	0.0249446	0.22987
Tarbagatai Administrative Offices	2014	0.0240883	0.631918	0.886024	0.0186841	0.241651
Tarbagatai Administrative Offices	2015	0.0221155	0.630338	0.920444	0.0122659	0.26685
Tarbagatai Administrative Offices	2016	0.0195512	0.616569	0.910475	0.0351911	0.219842
Tarbagatai Administrative Offices	2017	0.0170573	0.651443	0.89255	0.0230444	0.416155
Tarbagatai Administrative Offices	2018	0.0205715	0.608658	0.90325	0.0252212	0.477496
Altay Administrative Offices	2000	0.00684024	0.590296	0.838924	0.0396038	0.170012
Altay Administrative Offices	2001	0.00251259	0.603053	0.846086	0.0255005	0.179954
Altay Administrative Offices	2002	0.00414022	0.616752	0.856687	0.0335775	0.166733
Altay Administrative Offices	2003	0.00452537	0.632357	0.868284	0.0891	0.174972
Altay Administrative Offices	2004	0.00743869	0.622156	0.878206	0.0374717	0.182806
Altay Administrative Offices	2005	0.0197742	0.642184	0.868023	0.0237916	0.179859
Altay Administrative Offices	2006	0.00378605	0.658784	0.863196	0.0134267	0.199055
Altay Administrative Offices	2007	0.00179221	0.660834	0.842563	0.0130948	0.193533
Altay Administrative Offices	2008	0.00179647	0.655834	0.859191	0.049629	0.199735
Altay Administrative Offices	2009	0.0193535	0.664935	0.850776	0.0409727	0.188774
Altay Administrative Offices	2010	0.0148793	0.692988	0.86015	0.103285	0.204556
Altay Administrative Offices	2011	0.0188409	0.698572	0.921001	0.0786763	0.255621
Altay Administrative Offices	2012	0.0249041	0.693661	0.710264	0.0853654	0.274963
Altay Administrative Offices	2013	0.024944	0.720855	0.686905	0.108514	0.285197
Altay Administrative Offices	2014	0.0249466	0.734783	0.843631	0.117879	0.288608
Altay Administrative Offices	2015	0.0281148	0.735886	0.875021	0.109768	0.312688
Altay Administrative Offices	2016	0.0272942	0.72966	0.8632	0.124013	0.261855
Altay Administrative Offices	2017	0.0163341	0.774902	0.854525	0.134411	0.442777
Altay Administrative Offices	2018	0.0200713	0.784184	0.850761	0.0574094	0.477447
Bortala Mongolian Autonomous Prefecture	2000	0.0106976	0.583529	0.774836	0.218018	0.119182
Bortala Mongolian Autonomous Prefecture	2001	0.0179835	0.612246	0.790687	0.185119	0.133514
Bortala Mongolian Autonomous Prefecture	2002	0.0189756	0.616465	0.826351	0.308049	0.138898
Bortala Mongolian Autonomous Prefecture	2003	0.0291555	0.616127	0.849631	0.380201	0.132083
Bortala Mongolian Autonomous Prefecture	2004	0.0226959	0.605769	0.845859	0.486684	0.142097
Bortala Mongolian Autonomous Prefecture	2005	0.0149128	0.640911	0.860964	0.343698	0.144021
Bortala Mongolian Autonomous Prefecture	2006	0.0219293	0.653878	0.862983	0.272253	0.15475
Bortala Mongolian Autonomous Prefecture	2007	0.0370006	0.637602	0.821445	0.227588	0.157616
Bortala Mongolian Autonomous Prefecture	2008	0.00998629	0.658359	0.837355	0.249799	0.166245
Bortala Mongolian Autonomous Prefecture	2009	0.0198754	0.653941	0.836734	0.103756	0.163506
Bortala Mongolian Autonomous Prefecture	2010	0.0197279	0.598394	0.819841	0.0575932	0.178485
Bortala Mongolian Autonomous Prefecture	2011	0.0186242	0.619524	0.828383	0.110754	0.220099
Bortala Mongolian Autonomous Prefecture	2012	0.0152735	0.65324	0.790426	0.129037	0.231782
Bortala Mongolian Autonomous Prefecture	2013	0.0206664	0.689675	0.799376	0.114909	0.234058
Bortala Mongolian Autonomous Prefecture	2014	0.0218578	0.629403	0.801439	0.0833876	0.2384
Bortala Mongolian Autonomous Prefecture	2015	0.0221018	0.634134	0.872285	0.0811275	0.249594
Bortala Mongolian Autonomous Prefecture	2016	0.0208824	0.526891	0.848943	0.0591827	0.213507
Bortala Mongolian Autonomous Prefecture	2017	0.013801	0.646823	0.873755	0.067889	0.379307
Bortala Mongolian Autonomous Prefecture	2018	0.016012	0.634245	0.868779	0.0395811	0.396761
Bayangol Mongolian Autonomous Prefecture	2000	0.00844201	0.692996	0.785678	0.00853946	0.141457
Bayangol Mongolian Autonomous Prefecture	2001	0.0066004	0.704439	0.731156	0.00612634	0.163615
Bayangol Mongolian Autonomous Prefecture	2002	0.0177225	0.711589	0.782132	0.00720455	0.177238
Bayangol Mongolian Autonomous Prefecture	2003	0.0589725	0.712253	0.753256	0.00818165	0.183504
Bayangol Mongolian Autonomous Prefecture	2004	0.0130724	0.710039	0.791742	0.00598582	0.199034
Bayangol Mongolian Autonomous Prefecture	2005	0.0115029	0.72996	0.822142	0.00295478	0.203783
Bayangol Mongolian Autonomous Prefecture	2006	0.01239	0.736426	0.799026	0.00590769	0.208799
Bayangol Mongolian Autonomous Prefecture	2007	0.0121658	0.737962	0.813161	0.00698166	0.232735
Bayangol Mongolian Autonomous Prefecture	2008	0.148724	0.756368	0.806651	0.00828483	0.237548
Bayangol Mongolian Autonomous Prefecture	2009	0.129882	0.659329	0.794083	0.00319665	0.213576
Bayangol Mongolian Autonomous Prefecture	2010	0.167121	0.744196	0.758132	0.0070667	0.230733
Bayangol Mongolian Autonomous Prefecture	2011	0.17022	0.727971	0.751089	0.00798728	0.267906
Bayangol Mongolian Autonomous Prefecture	2012	0.132869	0.73916	0.752685	0.00992743	0.280931
Bayangol Mongolian Autonomous Prefecture	2013	0.139028	0.745948	0.716287	0.00874596	0.296907
Bayangol Mongolian Autonomous Prefecture	2014	0.106988	0.755843	0.752182	0.00696687	0.306472
Bayangol Mongolian Autonomous Prefecture	2015	0.11159	0.726414	0.775061	0.00901552	0.316607
Bayangol Mongolian Autonomous Prefecture	2016	0.113484	0.649779	0.781102	0.00804874	0.334478
Bayangol Mongolian Autonomous Prefecture	2017	0.126938	0.750211	0.765364	0.0122709	0.497397
Bayangol Mongolian Autonomous Prefecture	2018	0.118147	0.770987	0.764463	0.00238475	0.545452
Aksu Administrative Offices	2000	0.0154436	0.448994	0.859892	0.00205819	0.0867735
Aksu Administrative Offices	2001	0.0145446	0.50009	0.858075	0.0048118	0.140302
Aksu Administrative Offices	2002	0.0140561	0.504399	0.826219	0.00303314	0.0939469
Aksu Administrative Offices	2003	0.0162422	0.531523	0.83495	0.0165501	0.102566
Aksu Administrative Offices	2004	0.0167235	0.565317	0.829622	0.0149038	0.113715
Aksu Administrative Offices	2005	0.0143137	0.552797	0.753965	0.0064353	0.117389
Aksu Administrative Offices	2006	0.0264304	0.563062	0.734153	0.00282639	0.120438
Aksu Administrative Offices	2007	0.0311414	0.567188	0.71087	0.00156901	0.134066
Aksu Administrative Offices	2008	0.0205424	0.603975	0.766119	0.0044931	0.134808
Aksu Administrative Offices	2009	0.0714131	0.592993	0.755501	0.00445219	0.199378
Aksu Administrative Offices	2010	0.0615405	0.586692	0.740145	0.00949298	0.198597
Aksu Administrative Offices	2011	0.0547188	0.60615	0.691769	0.00910049	0.211847
Aksu Administrative Offices	2012	0.0420856	0.618267	0.69852	0.0153677	0.2169
Aksu Administrative Offices	2013	0.0539622	0.626312	0.61793	0.0141916	0.226638
Aksu Administrative Offices	2014	0.068839	0.64474	0.628564	0.0118711	0.220956
Aksu Administrative Offices	2015	0.0607748	0.652517	0.690023	0.00436248	0.170297
Aksu Administrative Offices	2016	0.0560344	0.602888	0.741696	0.00565151	0.186398
Aksu Administrative Offices	2017	0.0450827	0.678259	0.7533	0.00391003	0.444373
Aksu Administrative Offices	2018	0.0600275	0.668873	0.74771	0.00321071	0.484646
Kizilsu Kirgiz Autonomous Prefecture	2000	0.00115444	0.49768	0.717261	0.0400481	0.0948906
Kizilsu Kirgiz Autonomous Prefecture	2001	0.00136141	0.628309	0.739234	0.0815628	0.103376
Kizilsu Kirgiz Autonomous Prefecture	2002	0.0020789	0.543665	0.773981	0.066163	0.125328
Kizilsu Kirgiz Autonomous Prefecture	2003	0.00241926	0.614091	0.778854	0.0290949	0.124458
Kizilsu Kirgiz Autonomous Prefecture	2004	0.00247905	0.629856	0.772029	0.046366	0.131529
Kizilsu Kirgiz Autonomous Prefecture	2005	0.00109924	0.630389	0.823074	0.0639167	0.134452
Kizilsu Kirgiz Autonomous Prefecture	2006	0.000809485	0.655769	0.831122	0.0923108	0.141019
Kizilsu Kirgiz Autonomous Prefecture	2007	0.00166997	0.640938	0.820478	0.163338	0.146343
Kizilsu Kirgiz Autonomous Prefecture	2008	0.00228396	0.673687	0.835873	0.325553	0.139492
Kizilsu Kirgiz Autonomous Prefecture	2009	0.0581819	0.663924	0.843989	0.0883832	0.225389
Kizilsu Kirgiz Autonomous Prefecture	2010	0.0400324	0.670764	0.769062	0.211824	0.229242
Kizilsu Kirgiz Autonomous Prefecture	2011	0.0421622	0.684907	0.756596	0.0971409	0.240261
Kizilsu Kirgiz Autonomous Prefecture	2012	0.030438	0.685181	0.742453	0.0811879	0.252597
Kizilsu Kirgiz Autonomous Prefecture	2013	0.0258555	0.697367	0.785093	0.0926953	0.251073
Kizilsu Kirgiz Autonomous Prefecture	2014	0.0186221	0.716877	0.80264	0.0894508	0.251183
Kizilsu Kirgiz Autonomous Prefecture	2015	0.0168195	0.720547	0.824906	0.0556527	0.252202
Kizilsu Kirgiz Autonomous Prefecture	2016	0.0172352	0.782251	0.821939	0.0582729	0.190057
Kizilsu Kirgiz Autonomous Prefecture	2017	0.0144433	0.713549	0.831363	0.0560964	0.468446
Kizilsu Kirgiz Autonomous Prefecture	2018	0.0131869	0.726075	0.862986	0.0154297	0.51566
Kashgar Administrative Offices	2000	0.0109711	0.364192	0.759425	0.102161	0.150117
Kashgar Administrative Offices	2001	0.0110333	0.363844	0.846935	0.0557869	0.0680298
Kashgar Administrative Offices	2002	0.0205995	0.368184	0.832244	0.0369261	0.0725337
Kashgar Administrative Offices	2003	0.0268724	0.408632	0.865224	0.0303279	0.0849554
Kashgar Administrative Offices	2004	0.0243149	0.437445	0.792145	0.0798898	0.091102
Kashgar Administrative Offices	2005	0.0185264	0.442854	0.786896	0.027215	0.0910227
Kashgar Administrative Offices	2006	0.0194593	0.449922	0.789734	0.0606142	0.101112
Kashgar Administrative Offices	2007	0.0367603	0.474455	0.78726	0.0920077	0.116031
Kashgar Administrative Offices	2008	0.0351119	0.475165	0.81023	0.0923187	0.120293
Kashgar Administrative Offices	2009	0.0915027	0.489116	0.848622	0.0432247	0.131057
Kashgar Administrative Offices	2010	0.0831832	0.483668	0.854117	0.0548009	0.197525
Kashgar Administrative Offices	2011	0.0738583	0.553672	0.828821	0.0502213	0.220727
Kashgar Administrative Offices	2012	0.0734046	0.576327	0.841876	0.0400454	0.238179
Kashgar Administrative Offices	2013	0.0741418	0.615035	0.820358	0.0385257	0.246955
Kashgar Administrative Offices	2014	0.0698344	0.624145	0.805326	0.0266126	0.242583
Kashgar Administrative Offices	2015	0.0637636	0.638551	0.801935	0.0215945	0.255571
Kashgar Administrative Offices	2016	0.064882	0.649055	0.818475	0.0375786	0.268239
Kashgar Administrative Offices	2017	0.095831	0.622397	0.812314	0.0400969	0.540034
Kashgar Administrative Offices	2018	0.092337	0.621846	0.816785	0.0171065	0.553793
Hotan Administrative Offices	2000	0.00831216	0.296472	0.808815	0.0191961	0.0341667
Hotan Administrative Offices	2001	0.00845855	0.280955	0.823605	0.023663	0.0750505
Hotan Administrative Offices	2002	0.00826471	0.292357	0.804235	0.0128764	0.0418754
Hotan Administrative Offices	2003	0.0146345	0.345844	0.761149	0.00196425	0.0610329
Hotan Administrative Offices	2004	0.0161288	0.3715	0.766896	0.0232932	0.0680385
Hotan Administrative Offices	2005	0.0135713	0.381871	0.772907	0.0523727	0.0692555
Hotan Administrative Offices	2006	0.0156382	0.428134	0.786162	0.0148459	0.0744214
Hotan Administrative Offices	2007	0.365528	0.431574	0.768291	0.0155261	0.0735557
Hotan Administrative Offices	2008	0.0172887	0.4505	0.774028	0.0222444	0.0895154
Hotan Administrative Offices	2009	0.0261944	0.487607	0.77223	0.0127984	0.150143
Hotan Administrative Offices	2010	0.0311085	0.50728	0.76461	0.0212202	0.159886
Hotan Administrative Offices	2011	0.0274939	0.563407	0.765639	0.0285283	0.221442
Hotan Administrative Offices	2012	0.0530736	0.57304	0.758605	0.0214813	0.233974
Hotan Administrative Offices	2013	0.0556181	0.586381	0.742207	0.00687799	0.238064
Hotan Administrative Offices	2014	0.038084	0.580526	0.746992	0.0023744	0.222699
Hotan Administrative Offices	2015	0.0443567	0.609203	0.725671	0.0130524	0.217389
Hotan Administrative Offices	2016	0.0417311	0.63995	0.680001	0.00384636	0.168214
Hotan Administrative Offices	2017	0.0524645	0.645928	0.720798	0.00294233	0.429492
Hotan Administrative Offices	2018	0.0559887	0.639973	0.698875	0.00137128	0.459873
