# Supplementary material for: Decarbonization, Environmental Regulation, and Economic Boom: An Indicator Assessment Based on the Industrial Waste
Source: Frontiers journal article supplement (doi:10.3389/fenrg.2021.838852), 2022-02-03
Supplement: Data_Sheet_2.ZIP [file Calculation process and results of environmental regulation composite index.xlsx]

## Sheet: 过程
		Waste gas		Waste water		Waste residue
name	year	Industrial exhaust emissions/ GDP	Industrial SO2 emission / GDP	Industrial wastewater discharge /GDP	Industrial chemical oxygen demand emissions/ GDP	Production of industrial solid waste/GDP
Urumqi City	2000	2.04925	0.0182787	14.3603	0.000566718	0.591248
Urumqi City	2001	2.72313	0.0237161	16.235	0.00129678	0.801946
Urumqi City	2002	2.65571	0.0224158	14.2069	0.00116353	0.770706
Urumqi City	2003	2.37631	0.0200601	10.9865	0.000874795	0.7929
Urumqi City	2004	2.29852	0.0199499	10.2746	0.00076881	0.726282
Urumqi City	2005	2.35012	0.0194456	8.63799	0.000806268	0.705383
Urumqi City	2006	2.39536	0.0215196	8.33008	0.00112513	0.523718
Urumqi City	2007	2.70749	0.0196193	7.76427	0.00150644	0.765864
Urumqi City	2008	2.624	0.0171497	7.98567	0.00114159	0.725142
Urumqi City	2009	1.8948	0.0128867	7.18068	0.00105702	0.655027
Urumqi City	2010	2.35177	0.00999538	6.15461	0.00077436	0.731957
Urumqi City	2011	2.99574	0.0118673	4.41904	0.000744844	0.917422
Urumqi City	2012	2.83663	0.00922709	4.4925	0.000532417	1.01638
Urumqi City	2013	2.39681	0.0050439	3.32279	0.000404367	0.766284
Urumqi City	2014	2.50223	0.00438223	2.98205	0.000329185	0.591895
Urumqi City	2015	1.79205	0.00328999	1.95987	0.000305949	0.433632
Urumqi City	2016	1.44287	0.00219817	2.32192	0.000212091	0.396998
Urumqi City	2017	1.77026	0.00179368	1.59691	0.000157324	0.447782
Urumqi City	2018	1.53049	0.000785509	1.21588	0.00012582	0.433409
Karamay City	2000	2.20253	0.00547807	17.3587	0.00599361	0.153413
Karamay City	2001	2.32052	0.0065903	17.2807	0.00411344	0.124671
Karamay City	2002	2.10425	0.00633925	15.5893	0.00167366	0.126988
Karamay City	2003	2.47281	0.00690354	13.6451	0.00126325	0.138327
Karamay City	2004	2.65246	0.0125901	9.91423	0.00111237	0.15474
Karamay City	2005	2.83554	0.0123769	8.60364	0.000931081	0.161845
Karamay City	2006	2.50642	0.0112974	5.43624	0.000695272	0.19088
Karamay City	2007	2.20321	0.00958259	6.42322	0.000793382	0.147329
Karamay City	2008	2.11522	0.00875664	5.78485	0.000508966	0.145487
Karamay City	2009	2.53347	0.0162719	5.34655	0.000481478	0.14818
Karamay City	2010	3.05398	0.0145994	5.34399	0.000543274	0.347282
Karamay City	2011	2.96696	0.0152689	5.28996	0.000549412	0.176018
Karamay City	2012	3.13401	0.0142877	5.19445	0.000619999	0.284521
Karamay City	2013	3.27141	0.0125582	13.395	0.000570702	0.220206
Karamay City	2014	3.32108	0.00905523	5.06563	0.000436693	0.282391
Karamay City	2015	3.02892	0.00607232	3.93197	0.000400437	0.281313
Karamay City	2016	2.79077	0.00327979	4.08332	0.000362402	0.337278
Karamay City	2017	2.59093	0.00224505	3.41137	0.000223865	0.352426
Karamay City	2018	2.43064	0.00200829	3.37854	0.000259434	0.33061
Turpan City	2000	0.588173	0.00529976	1.10005	0.000416786	0.212844
Turpan City	2001	1.49489	0.00707494	1.23707	0.000844657	1.11055
Turpan City	2002	1.42813	0.00665861	0.963954	0.000556288	0.739049
Turpan City	2003	1.15876	0.0075019	0.87408	0.000335311	0.631321
Turpan City	2004	2.34538	0.0223129	0.861497	0.000190731	0.537536
Turpan City	2005	2.42946	0.0196048	0.681599	0.000146718	0.525255
Turpan City	2006	0.853481	0.0131037	0.786009	0.000131228	0.546416
Turpan City	2007	2.4175	0.0296617	0.136861	8.19851e-05	0.878343
Turpan City	2008	1.7414	0.0253354	0.0676342	0.000177856	0.936394
Turpan City	2009	1.6105	0.0165776	1.24686	0.000112381	1.45739
Turpan City	2010	1.96058	0.0135212	0.164487	0.000160439	0.994997
Turpan City	2011	2.18726	0.0124742	0.228101	8.86108e-05	1.71093
Turpan City	2012	2.81428	0.0114489	0.232208	0.000142528	2.24732
Turpan City	2013	4.38526	0.0220367	0.764404	0.000416711	1.77878
Turpan City	2014	2.95315	0.0100534	0.497754	0.000924168	1.71113
Turpan City	2015	2.59042	0.0208369	0.172108	0.000303844	1.09387
Turpan City	2016	2.73635	0.00669297	0.206069	3.2711e-05	1.16963
Turpan City	2017	4.80855	0.00575465	0.0422523	5.14667e-06	1.41524
Turpan City	2018	3.85785	0.00354929	0.107043	2.58584e-05	1.42212
Hami City	2000	1.85885	0.0263685	8.0495	0.000768225	0.84083
Hami City	2001	2.15551	0.0269852	12.0176	0.0011588	0.930477
Hami City	2002	2.56536	0.0287532	15.3307	0.00504293	0.957309
Hami City	2003	2.72755	0.0443728	16.2816	0.00361328	1.61798
Hami City	2004	4.93647	0.0850273	22.2423	0.00198897	3.0949
Hami City	2005	5.24521	0.0816086	20.4245	0.00182238	4.269
Hami City	2006	3.44539	0.0548815	15.2799	0.000635567	4.18403
Hami City	2007	4.05443	0.0567826	27.9526	0.00240978	5.56799
Hami City	2008	3.18247	0.0778045	12.0351	0.00171714	7.98484
Hami City	2009	3.29649	0.0554636	10.1296	0.000945439	7.06942
Hami City	2010	3.1748	0.0421279	9.61865	0.000812887	5.93999
Hami City	2011	2.35136	0.0351644	2.50655	0.000166742	4.22234
Hami City	2012	3.88448	0.0307239	3.723	0.000390564	8.40575
Hami City	2013	3.29071	0.0211757	3.66643	0.000309115	8.85376
Hami City	2014	3.31808	0.0219025	3.854	0.00103187	4.93425
Hami City	2015	5.16835	0.0229019	1.57619	0.000581979	5.75801
Hami City	2016	4.9901	0.0171873	0.753326	8.3424e-05	5.49721
Hami City	2017	7.36783	0.0119396	0.465863	6.24271e-05	4.89527
Hami City	2018	6.04309	0.00699457	0.550453	8.20016e-05	5.43446
Changji Hui Autonomous Prefecture	2000	2.42415	0.0246413	12.0416	0.0137445	0.303224
Changji Hui Autonomous Prefecture	2001	2.02275	0.0241474	12.3049	0.00422758	0.577271
Changji Hui Autonomous Prefecture	2002	2.19716	0.0215061	9.37817	0.00400783	1.43997
Changji Hui Autonomous Prefecture	2003	2.72791	0.0242612	8.8604	0.0118014	1.27197
Changji Hui Autonomous Prefecture	2004	2.13182	0.0233369	9.97725	0.00664895	0.645443
Changji Hui Autonomous Prefecture	2005	2.30094	0.0250106	11.3833	0.00816307	0.531203
Changji Hui Autonomous Prefecture	2006	2.1221	0.0163382	9.60895	0.00600921	0.471794
Changji Hui Autonomous Prefecture	2007	2.2491	0.0179096	7.27393	0.00380508	0.44037
Changji Hui Autonomous Prefecture	2008	2.44981	0.0176716	8.29498	0.00443262	0.502086
Changji Hui Autonomous Prefecture	2009	1.97768	0.0196751	7.79016	0.0042933	0.407924
Changji Hui Autonomous Prefecture	2010	2.56779	0.0162399	6.98776	0.0043015	0.676029
Changji Hui Autonomous Prefecture	2011	2.11222	0.0180732	5.81227	0.00290701	0.510826
Changji Hui Autonomous Prefecture	2012	2.65848	0.0108633	5.28007	0.00381284	2.34678
Changji Hui Autonomous Prefecture	2013	4.3394	0.013937	4.59985	0.00341867	2.27031
Changji Hui Autonomous Prefecture	2014	3.72745	0.016502	2.82445	0.00280963	1.13613
Changji Hui Autonomous Prefecture	2015	3.76218	0.0121495	1.90849	0.00260491	1.31246
Changji Hui Autonomous Prefecture	2016	4.82806	0.00461694	2.28231	0.000650041	1.07017
Changji Hui Autonomous Prefecture	2017	4.76224	0.00378999	1.86015	0.000411521	1.05517
Changji Hui Autonomous Prefecture	2018	5.02932	0.0038558	1.49007	0.000484793	1.12774
Counties (Cities) Direct Under Ili Prefecture	2000	0.272815	0.00245416	3.828	0.0174987	0.0731033
Counties (Cities) Direct Under Ili Prefecture	2001	0.866696	0.00919552	3.86597	0.00904336	1.16238
Counties (Cities) Direct Under Ili Prefecture	2002	1.68418	0.0162756	5.37382	0.0101967	0.892574
Counties (Cities) Direct Under Ili Prefecture	2003	1.64993	0.0158556	6.32677	0.0109297	0.563587
Counties (Cities) Direct Under Ili Prefecture	2004	1.82363	0.0143744	7.12703	0.0106769	0.458701
Counties (Cities) Direct Under Ili Prefecture	2005	1.77426	0.0159129	7.32562	0.0102221	0.49974
Counties (Cities) Direct Under Ili Prefecture	2006	2.33807	0.0207674	6.43792	0.00814721	0.524919
Counties (Cities) Direct Under Ili Prefecture	2007	2.36365	0.0140563	8.71949	0.0136239	0.642123
Counties (Cities) Direct Under Ili Prefecture	2008	2.41185	0.0139604	9.3947	0.00971801	0.587985
Counties (Cities) Direct Under Ili Prefecture	2009	2.8205	0.0136576	8.31034	0.00695702	0.586722
Counties (Cities) Direct Under Ili Prefecture	2010	2.9032	0.0114054	7.81599	0.00697997	0.706898
Counties (Cities) Direct Under Ili Prefecture	2011	1.63775	0.00955343	4.39029	0.00405325	1.03959
Counties (Cities) Direct Under Ili Prefecture	2012	2.15392	0.0096707	4.40979	0.00130448	1.15969
Counties (Cities) Direct Under Ili Prefecture	2013	3.235	0.011748	3.7509	0.00123844	1.98066
Counties (Cities) Direct Under Ili Prefecture	2014	4.60999	0.00973303	3.48222	0.00184387	1.1577
Counties (Cities) Direct Under Ili Prefecture	2015	2.3004	0.00735049	2.64997	0.00148436	0.632866
Counties (Cities) Direct Under Ili Prefecture	2016	2.32861	0.00332468	2.15207	0.000125819	1.13975
Counties (Cities) Direct Under Ili Prefecture	2017	1.78598	0.00186438	2.13671	0.000261422	2.28722
Counties (Cities) Direct Under Ili Prefecture	2018	2.77286	0.00166305	1.8269	0.000148989	1.62966
Tarbagatai Administrative Offices	2000	0.612263	0.00625478	1.82663	0.00249617	0.136789
Tarbagatai Administrative Offices	2001	0.578606	0.00249351	2.43383	0.00366129	0.131499
Tarbagatai Administrative Offices	2002	0.757292	0.0032413	2.69956	0.00435363	0.192721
Tarbagatai Administrative Offices	2003	1.20026	0.00435201	3.13995	0.00322347	0.177562
Tarbagatai Administrative Offices	2004	1.22522	0.00477694	5.14338	0.00326499	0.133637
Tarbagatai Administrative Offices	2005	1.28306	0.00569584	6.39108	0.00482511	0.122912
Tarbagatai Administrative Offices	2006	0.865649	0.00925837	4.33431	0.0073998	0.163371
Tarbagatai Administrative Offices	2007	0.878799	0.00869159	5.83294	0.00823083	0.225648
Tarbagatai Administrative Offices	2008	0.907166	0.00833016	6.22993	0.00828104	0.342394
Tarbagatai Administrative Offices	2009	1.44088	0.00748745	4.81939	0.00943688	0.251834
Tarbagatai Administrative Offices	2010	0.512798	0.00555656	5.87124	0.0101871	0.317187
Tarbagatai Administrative Offices	2011	1.00584	0.00772817	5.57112	0.00711778	0.490382
Tarbagatai Administrative Offices	2012	1.25476	0.00521604	3.38697	0.00247107	0.536049
Tarbagatai Administrative Offices	2013	1.51557	0.00470496	2.38883	0.00211764	0.56792
Tarbagatai Administrative Offices	2014	1.58442	0.00451149	2.56369	0.00221602	0.420628
Tarbagatai Administrative Offices	2015	1.38303	0.00222004	2.7754	0.000862384	0.332532
Tarbagatai Administrative Offices	2016	1.04094	0.0013829	2.82582	0.000316546	0.321369
Tarbagatai Administrative Offices	2017	0.731445	0.000981307	1.89619	0.000182525	0.345948
Tarbagatai Administrative Offices	2018	0.845929	0.000859549	2.15586	0.000227267	0.37989
Altay Administrative Offices	2000	1.62519	0.0403179	16.6378	0.0148797	1.49154
Altay Administrative Offices	2001	1.18015	0.0249294	15.1932	0.0125866	1.40092
Altay Administrative Offices	2002	0.855222	0.0221662	13.7869	0.014156	0.962439
Altay Administrative Offices	2003	0.911107	0.0208437	12.2946	0.0150594	1.51262
Altay Administrative Offices	2004	2.44396	0.0213847	12.422	0.0164585	1.83627
Altay Administrative Offices	2005	1.42446	0.0262796	10.991	0.0129255	2.26232
Altay Administrative Offices	2006	1.27414	0.0552612	7.98185	0.0185328	2.79822
Altay Administrative Offices	2007	1.38411	0.0666749	10.82	0.0059832	3.85183
Altay Administrative Offices	2008	2.14047	0.0541993	4.53053	0.00570286	2.98512
Altay Administrative Offices	2009	2.28853	0.0542696	3.20101	0.000733098	6.94932
Altay Administrative Offices	2010	1.70745	0.0535482	3.15902	0.00147173	9.36825
Altay Administrative Offices	2011	1.94707	0.0796479	6.98384	0.00203122	12.3292
Altay Administrative Offices	2012	1.9693	0.0895645	3.11629	0.001664	10.3521
Altay Administrative Offices	2013	2.09887	0.0847682	3.87133	0.00061903	10.1109
Altay Administrative Offices	2014	1.65323	0.0625137	4.03499	0.000678128	9.30703
Altay Administrative Offices	2015	1.2655	0.0720403	3.22272	0.000578665	8.12458
Altay Administrative Offices	2016	1.24671	0.00870345	2.9799	0.000614951	6.98329
Altay Administrative Offices	2017	1.123	0.00946271	16.24	0.000813919	7.05246
Altay Administrative Offices	2018	1.10162	0.00970029	8.50849	0.000782213	7.28449
Bortala Mongolian Autonomous Prefecture	2000	0.884582	0.0130609	6.12273	0.0138569	0.740832
Bortala Mongolian Autonomous Prefecture	2001	0.631669	0.00781913	6.91113	0.0083076	0.87701
Bortala Mongolian Autonomous Prefecture	2002	1.65752	0.0114555	11.9525	0.00785287	1.21179
Bortala Mongolian Autonomous Prefecture	2003	1.58398	0.0115654	12.4468	0.00881758	0.824382
Bortala Mongolian Autonomous Prefecture	2004	2.31297	0.0131626	11.1223	0.00916789	0.795712
Bortala Mongolian Autonomous Prefecture	2005	1.80284	0.0120579	9.32721	0.0080974	0.172802
Bortala Mongolian Autonomous Prefecture	2006	1.55243	0.0120373	7.10831	0.00588772	0.205046
Bortala Mongolian Autonomous Prefecture	2007	1.32777	0.0114425	6.04715	0.0141484	0.519347
Bortala Mongolian Autonomous Prefecture	2008	1.35416	0.00875081	5.62432	0.0141057	0.411557
Bortala Mongolian Autonomous Prefecture	2009	1.53802	0.0111659	6.40584	0.0139402	0.266936
Bortala Mongolian Autonomous Prefecture	2010	2.54513	0.00988	8.8489	0.0264309	0.217532
Bortala Mongolian Autonomous Prefecture	2011	2.72607	0.00798102	9.8857	0.0228841	0.251084
Bortala Mongolian Autonomous Prefecture	2012	1.48809	0.00888058	8.38646	0.0176132	0.353908
Bortala Mongolian Autonomous Prefecture	2013	1.51884	0.00838802	3.54186	0.00779989	0.234809
Bortala Mongolian Autonomous Prefecture	2014	1.2957	0.00831367	4.38683	0.00655222	0.241942
Bortala Mongolian Autonomous Prefecture	2015	1.21582	0.00376707	3.94433	0.00538812	0.134787
Bortala Mongolian Autonomous Prefecture	2016	1.20889	0.00334767	2.02935	0.000219381	0.132009
Bortala Mongolian Autonomous Prefecture	2017	1.31971	0.00219448	1.31835	0.000172253	0.160614
Bortala Mongolian Autonomous Prefecture	2018	1.12199	0.00191349	1.06935	0.000145919	0.161642
Bayangol Mongolian Autonomous Prefecture	2000	0.85429	0.00789388	19.1204	0.0199406	0.832694
Bayangol Mongolian Autonomous Prefecture	2001	0.900419	0.00642303	11.0286	0.0094771	0.131838
Bayangol Mongolian Autonomous Prefecture	2002	0.651506	0.00677215	11.1179	0.00824826	1.06461
Bayangol Mongolian Autonomous Prefecture	2003	0.802699	0.00763641	10.6649	0.00974647	0.968797
Bayangol Mongolian Autonomous Prefecture	2004	1.92266	0.0119278	15.4487	0.0155012	0.865578
Bayangol Mongolian Autonomous Prefecture	2005	1.56535	0.0112253	13.713	0.0213745	0.724079
Bayangol Mongolian Autonomous Prefecture	2006	1.2788	0.00680371	12.4359	0.0174659	0.789069
Bayangol Mongolian Autonomous Prefecture	2007	1.08948	0.00842263	10.4753	0.0182618	0.59153
Bayangol Mongolian Autonomous Prefecture	2008	0.825255	0.00805821	12.3523	0.0148243	0.605432
Bayangol Mongolian Autonomous Prefecture	2009	1.1241	0.006869	13.854	0.0140239	0.73196
Bayangol Mongolian Autonomous Prefecture	2010	1.91723	0.00982437	15.4887	0.0168586	1.06682
Bayangol Mongolian Autonomous Prefecture	2011	2.16074	0.0105397	12.5554	0.0144697	0.912569
Bayangol Mongolian Autonomous Prefecture	2012	5.7537	0.0115066	15.6496	0.0159234	0.961658
Bayangol Mongolian Autonomous Prefecture	2013	2.81161	0.011428	14.6479	0.0158961	0.729424
Bayangol Mongolian Autonomous Prefecture	2014	1.86793	0.00807511	14.0693	0.0136117	0.720696
Bayangol Mongolian Autonomous Prefecture	2015	1.19726	0.00460359	9.57845	0.0141616	0.263911
Bayangol Mongolian Autonomous Prefecture	2016	1.23567	0.00234392	4.95707	0.000418296	2.11972
Bayangol Mongolian Autonomous Prefecture	2017	1.59164	0.00177277	4.48466	0.000302878	1.54532
Bayangol Mongolian Autonomous Prefecture	2018	1.99793	0.00174298	4.38338	0.000351781	1.29061
Aksu Administrative Offices	2000	0.809178	0.00627775	1.36845	0.00125187	0.130361
Aksu Administrative Offices	2001	0.496854	0.00351843	1.75382	0.00381776	0.142829
Aksu Administrative Offices	2002	1.53562	0.00463194	2.39038	0.004569	0.326721
Aksu Administrative Offices	2003	1.40328	0.00440749	2.66105	0.00456267	0.360935
Aksu Administrative Offices	2004	1.82768	0.01378	3.73593	0.00355289	0.389198
Aksu Administrative Offices	2005	1.67066	0.00780547	4.56185	0.00429463	0.369891
Aksu Administrative Offices	2006	3.22545	0.0141772	3.79267	0.00643064	0.635133
Aksu Administrative Offices	2007	2.20053	0.0123964	5.4568	0.0025123	0.443029
Aksu Administrative Offices	2008	2.14323	0.0105032	6.03661	0.00384864	0.35228
Aksu Administrative Offices	2009	2.5094	0.00989572	8.06974	0.00432693	0.69586
Aksu Administrative Offices	2010	2.66689	0.0077857	6.60338	0.00316211	0.539403
Aksu Administrative Offices	2011	2.06749	0.0066511	6.3203	0.0045035	0.454021
Aksu Administrative Offices	2012	3.25324	0.00729254	5.75659	0.00465705	0.659752
Aksu Administrative Offices	2013	3.33074	0.00566182	4.18743	0.00420887	0.484465
Aksu Administrative Offices	2014	2.57482	0.00493178	3.37738	0.00373529	0.575197
Aksu Administrative Offices	2015	1.47389	0.00214616	2.71168	0.00276818	0.398317
Aksu Administrative Offices	2016	0.940333	0.000997783	1.78466	0.000150292	0.273202
Aksu Administrative Offices	2017	1.17089	0.00114677	1.85828	0.00014618	0.274528
Aksu Administrative Offices	2018	1.21505	0.00099406	1.64241	0.000133476	0.301502
Kizilsu Kirgiz Autonomous Prefecture	2000	1.43024	0.0128098	22.1058	0.00291027	0.406347
Kizilsu Kirgiz Autonomous Prefecture	2001	2.15463	0.00678846	7.18745	0.00762611	0.317051
Kizilsu Kirgiz Autonomous Prefecture	2002	1.33069	0.00688025	2.24285	0.000355567	0.227938
Kizilsu Kirgiz Autonomous Prefecture	2003	1.38922	0.00513197	1.68549	0.00026473	0.144266
Kizilsu Kirgiz Autonomous Prefecture	2004	1.92648	0.00339072	2.17617	0.00100101	0.0892792
Kizilsu Kirgiz Autonomous Prefecture	2005	2.35677	0.00427331	3.12427	0.00101015	0.170345
Kizilsu Kirgiz Autonomous Prefecture	2006	13.9526	0.0147009	8.69267	0.00163659	0.9365
Kizilsu Kirgiz Autonomous Prefecture	2007	2.47707	0.0159249	8.37943	0.00197322	0.49929
Kizilsu Kirgiz Autonomous Prefecture	2008	1.64233	0.012877	10.9325	0.0018846	0.865383
Kizilsu Kirgiz Autonomous Prefecture	2009	0.901316	0.0139248	2.35432	0.000860771	1.93603
Kizilsu Kirgiz Autonomous Prefecture	2010	13.0253	0.0065718	2.94144	0.0014775	0.842249
Kizilsu Kirgiz Autonomous Prefecture	2011	2.24977	0.00811586	5.87822	0.000892449	5.62189
Kizilsu Kirgiz Autonomous Prefecture	2012	2.17412	0.00861825	1.3877	0.000834147	4.88017
Kizilsu Kirgiz Autonomous Prefecture	2013	1.92365	0.00644792	1.30513	0.000648644	7.55771
Kizilsu Kirgiz Autonomous Prefecture	2014	1.90838	0.00605855	0.369629	0.000141942	5.85201
Kizilsu Kirgiz Autonomous Prefecture	2015	0.78182	0.00250353	0.0424637	3.93551e-05	7.18531
Kizilsu Kirgiz Autonomous Prefecture	2016	0.46891	0.00146916	0.113306	1.52428e-05	8.24716
Kizilsu Kirgiz Autonomous Prefecture	2017	0.432691	0.00125051	0.105913	5.50883e-06	5.70241
Kizilsu Kirgiz Autonomous Prefecture	2018	0.40968	0.00109925	0.0996367	9.26984e-06	7.65776
Kashgar Administrative Offices	2000	0.364456	0.00199108	4.43741	2.65203e-05	0.0255924
Kashgar Administrative Offices	2001	0.413222	0.00386558	2.93329	0.00199553	0.125868
Kashgar Administrative Offices	2002	0.612521	0.00380367	3.05302	0.00173582	0.0595557
Kashgar Administrative Offices	2003	0.776372	0.00489282	2.92322	0.00105918	0.0689693
Kashgar Administrative Offices	2004	0.843258	0.00549491	3.07606	0.000745675	0.0785348
Kashgar Administrative Offices	2005	1.13829	0.00703308	3.60312	0.000723446	0.119107
Kashgar Administrative Offices	2006	0.373904	0.00861781	3.52535	0.00122556	0.655073
Kashgar Administrative Offices	2007	0.307112	0.00562413	3.68946	0.00086075	0.676446
Kashgar Administrative Offices	2008	0.729416	0.00550006	2.63125	0.000481616	0.0875626
Kashgar Administrative Offices	2009	0.520606	0.00574195	2.14997	0.000546664	0.172564
Kashgar Administrative Offices	2010	1.48317	0.0064321	3.79616	0.00105706	0.355447
Kashgar Administrative Offices	2011	1.24096	0.00973673	2.59906	0.00116963	0.406985
Kashgar Administrative Offices	2012	1.6953	0.00868114	1.94724	0.00100825	0.38057
Kashgar Administrative Offices	2013	2.35849	0.00806448	1.11821	0.000763032	1.52927
Kashgar Administrative Offices	2014	1.93158	0.00438759	1.51573	0.000879922	1.3451
Kashgar Administrative Offices	2015	1.26673	0.00325412	0.984146	0.00059669	0.219307
Kashgar Administrative Offices	2016	0.798061	0.00196973	0.358103	0.000163425	0.169179
Kashgar Administrative Offices	2017	0.838805	0.00151956	0.309773	0.000108983	0.160722
Kashgar Administrative Offices	2018	0.763428	0.00148893	0.20357	0.000126205	0.249427
Hotan Administrative Offices	2000	0.61905	0.00628177	1.86211	0.000238082	0.218885
Hotan Administrative Offices	2001	0.86246	0.0100563	1.69634	0.000225893	0.635201
Hotan Administrative Offices	2002	0.9449	0.00751909	1.89382	0.000351601	0.587445
Hotan Administrative Offices	2003	0.820762	0.00561085	1.40032	0.000478847	0.0527511
Hotan Administrative Offices	2004	0.877895	0.00468825	1.67896	0.00050644	0.0974693
Hotan Administrative Offices	2005	0.830331	0.00396238	1.05105	0.000352084	0.0593788
Hotan Administrative Offices	2006	4.77682	0.00752913	0.620217	0.000257214	0.0264116
Hotan Administrative Offices	2007	5.13319	0.00375779	0.821472	0.000166046	0.0359157
Hotan Administrative Offices	2008	1.06151	0.0027656	0.424863	0.000195281	0.0438967
Hotan Administrative Offices	2009	4.96921	0.00273712	0.519425	7.74951e-05	0.0828276
Hotan Administrative Offices	2010	1.62269	0.00264194	0.406827	0.00014471	0.0504542
Hotan Administrative Offices	2011	0.830651	0.00350064	0.473435	0.000426365	0.127382
Hotan Administrative Offices	2012	1.38489	0.0112361	0.370776	0.000187562	0.208892
Hotan Administrative Offices	2013	1.81447	0.00304893	0.235003	0.000174375	0.204311
Hotan Administrative Offices	2014	3.9516	0.00283362	0.180015	0.000120001	0.227984
Hotan Administrative Offices	2015	3.7155	0.0146282	0.159466	0.000115941	0.218268
Hotan Administrative Offices	2016	2.45082	0.00420593	0.140302	3.86355e-05	0.239389
Hotan Administrative Offices	2017	4.85324	0.0014482	0.128073	0.000127486	0.144132
Hotan Administrative Offices	2018	3.71511	0.00161434	0.0735325	0.000116825	0.0877479
Max		13.9526	0.0895645	27.9526	0.0264309	12.3292
Min		0.272815	0.000785509	0.0422523	5.14667e-06	0.0255924
Max-Min		13.6798	0.088779	27.9104	0.0264258	12.3036
Xij
Urumqi City	2000	1.87014	1.80296	1.487	1.97875	1.95403
Urumqi City	2001	1.82088	1.74171	1.41983	1.95112	1.9369
Urumqi City	2002	1.82581	1.75636	1.49249	1.95616	1.93944
Urumqi City	2003	1.84623	1.78289	1.60788	1.96709	1.93764
Urumqi City	2004	1.85192	1.78413	1.63338	1.9711	1.94305
Urumqi City	2005	1.84815	1.78981	1.69202	1.96968	1.94475
Urumqi City	2006	1.84484	1.76645	1.70306	1.95762	1.95951
Urumqi City	2007	1.82202	1.78786	1.72333	1.94319	1.93983
Urumqi City	2008	1.82813	1.81567	1.7154	1.95699	1.94314
Urumqi City	2009	1.88143	1.86369	1.74424	1.9602	1.94884
Urumqi City	2010	1.84803	1.89626	1.781	1.97089	1.94259
Urumqi City	2011	1.80095	1.87518	1.84318	1.97201	1.92751
Urumqi City	2012	1.81258	1.90491	1.84055	1.98005	1.91947
Urumqi City	2013	1.84473	1.95203	1.88246	1.98489	1.9398
Urumqi City	2014	1.83703	1.95949	1.89467	1.98774	1.95397
Urumqi City	2015	1.88894	1.97179	1.93129	1.98862	1.96684
Urumqi City	2016	1.91447	1.98409	1.91832	1.99217	1.96981
Urumqi City	2017	1.89054	1.98864	1.9443	1.99424	1.96569
Urumqi City	2018	1.90806	2	1.95795	1.99543	1.96685
Karamay City	2000	1.85894	1.94714	1.37957	1.77339	1.98961
Karamay City	2001	1.85031	1.93462	1.38236	1.84453	1.99195
Karamay City	2002	1.86612	1.93744	1.44297	1.93686	1.99176
Karamay City	2003	1.83918	1.93109	1.51262	1.95239	1.99084
Karamay City	2004	1.82605	1.86703	1.6463	1.9581	1.9895
Karamay City	2005	1.81266	1.86944	1.69325	1.96496	1.98893
Karamay City	2006	1.83672	1.88159	1.80674	1.97388	1.98657
Karamay City	2007	1.85889	1.90091	1.77138	1.97017	1.99011
Karamay City	2008	1.86532	1.91021	1.79425	1.98093	1.99026
Karamay City	2009	1.83474	1.82556	1.80995	1.98197	1.99004
Karamay City	2010	1.7967	1.8444	1.81004	1.97964	1.97385
Karamay City	2011	1.80306	1.83686	1.81198	1.9794	1.98777
Karamay City	2012	1.79085	1.84791	1.8154	1.97673	1.97895
Karamay City	2013	1.7808	1.86739	1.52159	1.9786	1.98418
Karamay City	2014	1.77717	1.90685	1.82002	1.98367	1.97913
Karamay City	2015	1.79853	1.94045	1.86064	1.98504	1.97922
Karamay City	2016	1.81594	1.9719	1.85521	1.98648	1.97467
Karamay City	2017	1.83054	1.98356	1.87929	1.99172	1.97344
Karamay City	2018	1.84226	1.98623	1.88046	1.99038	1.97521
Turpan City	2000	1.97695	1.94915	1.9621	1.98442	1.98478
Turpan City	2001	1.91067	1.92916	1.95719	1.96823	1.91182
Turpan City	2002	1.91555	1.93385	1.96698	1.97914	1.94201
Turpan City	2003	1.93524	1.92435	1.9702	1.98751	1.95077
Turpan City	2004	1.84849	1.75752	1.97065	1.99298	1.95839
Turpan City	2005	1.84235	1.78802	1.97709	1.99464	1.95939
Turpan City	2006	1.95755	1.86125	1.97335	1.99523	1.95767
Turpan City	2007	1.84322	1.67474	1.99661	1.99709	1.93069
Turpan City	2008	1.89265	1.72347	1.99909	1.99346	1.92597
Turpan City	2009	1.90221	1.82212	1.95684	1.99594	1.88363
Turpan City	2010	1.87662	1.85655	1.99562	1.99412	1.92121
Turpan City	2011	1.86005	1.86834	1.99334	1.99684	1.86302
Turpan City	2012	1.81422	1.87989	1.99319	1.9948	1.81942
Turpan City	2013	1.69938	1.76063	1.97413	1.98443	1.85751
Turpan City	2014	1.80407	1.89561	1.98368	1.96522	1.863
Turpan City	2015	1.83058	1.77414	1.99535	1.9887	1.91317
Turpan City	2016	1.81991	1.93346	1.99413	1.99896	1.90702
Turpan City	2017	1.66843	1.94403	2	2	1.88705
Turpan City	2018	1.73793	1.96887	1.99768	1.99922	1.88649
Hami City	2000	1.88406	1.71183	1.71311	1.97112	1.93374
Hami City	2001	1.86237	1.70489	1.57094	1.95634	1.92645
Hami City	2002	1.83241	1.68497	1.45223	1.80936	1.92427
Hami City	2003	1.82056	1.50904	1.41816	1.86346	1.87058
Hami City	2004	1.65908	1.05111	1.20459	1.92493	1.75053
Hami City	2005	1.63652	1.08961	1.26972	1.93123	1.65511
Hami City	2006	1.76808	1.39067	1.45405	1.97614	1.66201
Hami City	2007	1.72356	1.36925	1	1.909	1.54953
Hami City	2008	1.7873	1.13246	1.57031	1.93522	1.35309
Hami City	2009	1.77897	1.38411	1.63858	1.96442	1.4275
Hami City	2010	1.78786	1.53432	1.65689	1.96943	1.51929
Hami City	2011	1.84806	1.61276	1.91171	1.99388	1.6589
Hami City	2012	1.73599	1.66278	1.86812	1.98542	1.31888
Hami City	2013	1.77939	1.77033	1.87015	1.9885	1.28247
Hami City	2014	1.77739	1.76214	1.86343	1.96115	1.60104
Hami City	2015	1.64213	1.75088	1.94504	1.97817	1.53408
Hami City	2016	1.65516	1.81525	1.97452	1.99704	1.55528
Hami City	2017	1.48135	1.87436	1.98482	1.99783	1.60421
Hami City	2018	1.57819	1.93006	1.98179	1.99709	1.56038
Changji Hui Autonomous Prefecture	2000	1.84274	1.73129	1.57008	1.48008	1.97743
Changji Hui Autonomous Prefecture	2001	1.87208	1.73685	1.56064	1.84022	1.95516
Changji Hui Autonomous Prefecture	2002	1.85933	1.7666	1.6655	1.84853	1.88504
Changji Hui Autonomous Prefecture	2003	1.82053	1.73557	1.68405	1.55361	1.8987
Changji Hui Autonomous Prefecture	2004	1.86411	1.74598	1.64404	1.74859	1.94962
Changji Hui Autonomous Prefecture	2005	1.85174	1.72713	1.59366	1.69129	1.95891
Changji Hui Autonomous Prefecture	2006	1.86482	1.82482	1.65724	1.7728	1.96373
Changji Hui Autonomous Prefecture	2007	1.85553	1.80712	1.7409	1.8562	1.96629
Changji Hui Autonomous Prefecture	2008	1.84086	1.8098	1.70431	1.83246	1.96127
Changji Hui Autonomous Prefecture	2009	1.87537	1.78723	1.7224	1.83773	1.96893
Changji Hui Autonomous Prefecture	2010	1.83224	1.82592	1.75115	1.83742	1.94713
Changji Hui Autonomous Prefecture	2011	1.86554	1.80527	1.79327	1.89019	1.96056
Changji Hui Autonomous Prefecture	2012	1.82561	1.88649	1.81233	1.85591	1.81134
Changji Hui Autonomous Prefecture	2013	1.70273	1.85186	1.83671	1.87083	1.81756
Changji Hui Autonomous Prefecture	2014	1.74746	1.82297	1.90032	1.89387	1.90974
Changji Hui Autonomous Prefecture	2015	1.74493	1.872	1.93313	1.90162	1.89541
Changji Hui Autonomous Prefecture	2016	1.66701	1.95684	1.91974	1.9756	1.9151
Changji Hui Autonomous Prefecture	2017	1.67182	1.96616	1.93487	1.98462	1.91632
Changji Hui Autonomous Prefecture	2018	1.6523	1.96542	1.94813	1.98185	1.91042
prefectures and cities directly under Ili Kazak Autonomous Prefecture	2000	2	1.9812	1.86436	1.33801	1.99614
prefectures and cities directly under Ili Kazak Autonomous Prefecture	2001	1.95659	1.90527	1.863	1.65798	1.90761
Counties (Cities) Direct Under Ili Prefecture	2002	1.89683	1.82552	1.80898	1.61433	1.92953
Counties (Cities) Direct Under Ili Prefecture	2003	1.89933	1.83025	1.77483	1.5866	1.95627
Counties (Cities) Direct Under Ili Prefecture	2004	1.88663	1.84694	1.74616	1.59616	1.9648
Counties (Cities) Direct Under Ili Prefecture	2005	1.89024	1.82961	1.73904	1.61337	1.96146
Counties (Cities) Direct Under Ili Prefecture	2006	1.84903	1.77493	1.77085	1.69189	1.95942
Counties (Cities) Direct Under Ili Prefecture	2007	1.84716	1.85052	1.6891	1.48464	1.94989
Counties (Cities) Direct Under Ili Prefecture	2008	1.84364	1.8516	1.66491	1.63245	1.95429
Counties (Cities) Direct Under Ili Prefecture	2009	1.81376	1.85501	1.70376	1.73693	1.95439
Counties (Cities) Direct Under Ili Prefecture	2010	1.80772	1.88038	1.72147	1.73606	1.94463
Counties (Cities) Direct Under Ili Prefecture	2011	1.90022	1.90124	1.84421	1.84681	1.91758
Counties (Cities) Direct Under Ili Prefecture	2012	1.86249	1.89992	1.84352	1.95083	1.90782
Counties (Cities) Direct Under Ili Prefecture	2013	1.78346	1.87652	1.86712	1.95333	1.8411
Counties (Cities) Direct Under Ili Prefecture	2014	1.68295	1.89922	1.87675	1.93042	1.90799
Counties (Cities) Direct Under Ili Prefecture	2015	1.85178	1.92605	1.90657	1.94402	1.95064
Counties (Cities) Direct Under Ili Prefecture	2016	1.84972	1.9714	1.92441	1.99543	1.90944
Counties (Cities) Direct Under Ili Prefecture	2017	1.88939	1.98785	1.92496	1.9903	1.81618
Counties (Cities) Direct Under Ili Prefecture	2018	1.81725	1.99012	1.93606	1.99456	1.86963
Tarbagatai Administrative Offices	2000	1.97519	1.93839	1.93607	1.90574	1.99096
Tarbagatai Administrative Offices	2001	1.97765	1.98076	1.91431	1.86164	1.99139
Tarbagatai Administrative Offices	2002	1.96458	1.97234	1.90479	1.83545	1.98642
Tarbagatai Administrative Offices	2003	1.9322	1.95983	1.88901	1.87821	1.98765
Tarbagatai Administrative Offices	2004	1.93038	1.95504	1.81723	1.87664	1.99122
Tarbagatai Administrative Offices	2005	1.92615	1.94469	1.77253	1.8176	1.99209
Tarbagatai Administrative Offices	2006	1.95666	1.90456	1.84622	1.72017	1.9888
Tarbagatai Administrative Offices	2007	1.9557	1.91095	1.79253	1.68873	1.98374
Tarbagatai Administrative Offices	2008	1.95363	1.91502	1.7783	1.68683	1.97425
Tarbagatai Administrative Offices	2009	1.91461	1.92451	1.82884	1.64309	1.98161
Tarbagatai Administrative Offices	2010	1.98246	1.94626	1.79115	1.6147	1.9763
Tarbagatai Administrative Offices	2011	1.94642	1.9218	1.80191	1.73085	1.96222
Tarbagatai Administrative Offices	2012	1.92822	1.95009	1.88016	1.90668	1.95851
Tarbagatai Administrative Offices	2013	1.90915	1.95585	1.91592	1.92006	1.95592
Tarbagatai Administrative Offices	2014	1.90412	1.95803	1.90966	1.91634	1.96789
Tarbagatai Administrative Offices	2015	1.91884	1.98384	1.90207	1.96756	1.97505
Tarbagatai Administrative Offices	2016	1.94385	1.99327	1.90027	1.98822	1.97596
Tarbagatai Administrative Offices	2017	1.96647	1.99779	1.93358	1.99329	1.97396
Tarbagatai Administrative Offices	2018	1.95811	1.99917	1.92427	1.99159	1.9712
Altay Administrative Offices	2000	1.90114	1.55471	1.4054	1.43712	1.88085
Altay Administrative Offices	2001	1.93367	1.72805	1.45716	1.52389	1.88822
Altay Administrative Offices	2002	1.95743	1.75917	1.50754	1.4645	1.92386
Altay Administrative Offices	2003	1.95334	1.77407	1.56101	1.43032	1.87914
Altay Administrative Offices	2004	1.84129	1.76797	1.55645	1.37738	1.85283
Altay Administrative Offices	2005	1.91581	1.71284	1.60772	1.51107	1.8182
Altay Administrative Offices	2006	1.9268	1.38639	1.71553	1.29888	1.77465
Altay Administrative Offices	2007	1.91876	1.25783	1.61384	1.77378	1.68901
Altay Administrative Offices	2008	1.86347	1.39835	1.83919	1.78439	1.75946
Altay Administrative Offices	2009	1.85265	1.39756	1.88683	1.97245	1.43726
Altay Administrative Offices	2010	1.89513	1.40569	1.88833	1.9445	1.24065
Altay Administrative Offices	2011	1.87761	1.1117	1.75129	1.92333	1
Altay Administrative Offices	2012	1.87599	1	1.88986	1.93723	1.16069
Altay Administrative Offices	2013	1.86651	1.05403	1.86281	1.97677	1.18029
Altay Administrative Offices	2014	1.89909	1.3047	1.85694	1.97453	1.24563
Altay Administrative Offices	2015	1.92743	1.19739	1.88605	1.9783	1.34174
Altay Administrative Offices	2016	1.92881	1.91081	1.89475	1.97692	1.4345
Altay Administrative Offices	2017	1.93785	1.90226	1.41965	1.96939	1.42888
Altay Administrative Offices	2018	1.93941	1.89958	1.69666	1.97059	1.41002
Bortala Mongolian Autonomous Prefecture	2000	1.95528	1.86173	1.78214	1.47583	1.94187
Bortala Mongolian Autonomous Prefecture	2001	1.97377	1.92077	1.7539	1.68582	1.9308
Bortala Mongolian Autonomous Prefecture	2002	1.89878	1.87981	1.57327	1.70303	1.90359
Bortala Mongolian Autonomous Prefecture	2003	1.90415	1.87858	1.55556	1.66652	1.93508
Bortala Mongolian Autonomous Prefecture	2004	1.85086	1.86059	1.60301	1.65327	1.93741
Bortala Mongolian Autonomous Prefecture	2005	1.88815	1.87303	1.66733	1.69377	1.98804
Bortala Mongolian Autonomous Prefecture	2006	1.90646	1.87326	1.74683	1.77739	1.98541
Bortala Mongolian Autonomous Prefecture	2007	1.92288	1.87996	1.78485	1.46479	1.95987
Bortala Mongolian Autonomous Prefecture	2008	1.92095	1.91028	1.8	1.46641	1.96863
Bortala Mongolian Autonomous Prefecture	2009	1.90751	1.88308	1.772	1.47267	1.98038
Bortala Mongolian Autonomous Prefecture	2010	1.83389	1.89756	1.68447	1	1.9844
Bortala Mongolian Autonomous Prefecture	2011	1.82067	1.91895	1.64732	1.13422	1.98167
Bortala Mongolian Autonomous Prefecture	2012	1.91116	1.90882	1.70104	1.33368	1.97332
Bortala Mongolian Autonomous Prefecture	2013	1.90891	1.91437	1.87461	1.70503	1.983
Bortala Mongolian Autonomous Prefecture	2014	1.92523	1.9152	1.84434	1.75225	1.98242
Bortala Mongolian Autonomous Prefecture	2015	1.93107	1.96642	1.86019	1.7963	1.99112
Bortala Mongolian Autonomous Prefecture	2016	1.93157	1.97114	1.9288	1.99189	1.99135
Bortala Mongolian Autonomous Prefecture	2017	1.92347	1.98413	1.95428	1.99368	1.98903
Bortala Mongolian Autonomous Prefecture	2018	1.93792	1.98729	1.9632	1.99467	1.98894
Bayangol Mongolian Autonomous Prefecture	2000	1.95749	1.91993	1.31645	1.24561	1.9344
Bayangol Mongolian Autonomous Prefecture	2001	1.95412	1.9365	1.60637	1.64156	1.99136
Bayangol Mongolian Autonomous Prefecture	2002	1.97232	1.93257	1.60317	1.68807	1.91555
Bayangol Mongolian Autonomous Prefecture	2003	1.96127	1.92283	1.6194	1.63137	1.92334
Bayangol Mongolian Autonomous Prefecture	2004	1.8794	1.87449	1.448	1.4136	1.93173
Bayangol Mongolian Autonomous Prefecture	2005	1.90552	1.88241	1.51019	1.19135	1.94323
Bayangol Mongolian Autonomous Prefecture	2006	1.92646	1.93221	1.55595	1.33925	1.93795
Bayangol Mongolian Autonomous Prefecture	2007	1.9403	1.91398	1.6262	1.30914	1.954
Bayangol Mongolian Autonomous Prefecture	2008	1.95962	1.91808	1.55894	1.43922	1.95287
Bayangol Mongolian Autonomous Prefecture	2009	1.93777	1.93148	1.50514	1.4695	1.94259
Bayangol Mongolian Autonomous Prefecture	2010	1.87979	1.89819	1.44657	1.36224	1.91537
Bayangol Mongolian Autonomous Prefecture	2011	1.86199	1.89013	1.55167	1.45263	1.92791
Bayangol Mongolian Autonomous Prefecture	2012	1.59934	1.87924	1.44081	1.39762	1.92392
Bayangol Mongolian Autonomous Prefecture	2013	1.81441	1.88012	1.47669	1.39866	1.94279
Bayangol Mongolian Autonomous Prefecture	2014	1.8834	1.91789	1.49743	1.4851	1.9435
Bayangol Mongolian Autonomous Prefecture	2015	1.93242	1.95699	1.65833	1.46429	1.98063
Bayangol Mongolian Autonomous Prefecture	2016	1.92962	1.98245	1.82391	1.98437	1.8298
Bayangol Mongolian Autonomous Prefecture	2017	1.90359	1.98888	1.84083	1.98873	1.87648
Bayangol Mongolian Autonomous Prefecture	2018	1.87389	1.98922	1.84446	1.98688	1.89718
Aksu Administrative Offices	2000	1.96079	1.93814	1.95248	1.95282	1.99148
Aksu Administrative Offices	2001	1.98362	1.96922	1.93868	1.85572	1.99047
Aksu Administrative Offices	2002	1.90769	1.95667	1.91587	1.8273	1.97553
Aksu Administrative Offices	2003	1.91736	1.9592	1.90617	1.82753	1.97274
Aksu Administrative Offices	2004	1.88634	1.85363	1.86766	1.86575	1.97045
Aksu Administrative Offices	2005	1.89782	1.92093	1.83807	1.83768	1.97202
Aksu Administrative Offices	2006	1.78416	1.84916	1.86563	1.75685	1.95046
Aksu Administrative Offices	2007	1.85908	1.86922	1.806	1.90512	1.96607
Aksu Administrative Offices	2008	1.86327	1.89054	1.78523	1.85456	1.97345
Aksu Administrative Offices	2009	1.8365	1.89738	1.71238	1.83646	1.94552
Aksu Administrative Offices	2010	1.82499	1.92115	1.76492	1.88053	1.95824
Aksu Administrative Offices	2011	1.86881	1.93393	1.77506	1.82977	1.96518
Aksu Administrative Offices	2012	1.78213	1.92671	1.79526	1.82396	1.94846
Aksu Administrative Offices	2013	1.77646	1.94507	1.85148	1.84092	1.9627
Aksu Administrative Offices	2014	1.83172	1.9533	1.88051	1.85884	1.95533
Aksu Administrative Offices	2015	1.9122	1.98467	1.90436	1.89544	1.96971
Aksu Administrative Offices	2016	1.9512	1.99761	1.93757	1.99451	1.97987
Aksu Administrative Offices	2017	1.93435	1.99593	1.93493	1.99466	1.97977
Aksu Administrative Offices	2018	1.93112	1.99765	1.94267	1.99514	1.97757
Kizilsu Kirgiz Autonomous Prefecture	2000	1.91539	1.86456	1.20948	1.89006	1.96905
Kizilsu Kirgiz Autonomous Prefecture	2001	1.86244	1.93238	1.74399	1.71161	1.97631
Kizilsu Kirgiz Autonomous Prefecture	2002	1.92267	1.93135	1.92115	1.98674	1.98355
Kizilsu Kirgiz Autonomous Prefecture	2003	1.91839	1.95104	1.94112	1.99018	1.99035
Kizilsu Kirgiz Autonomous Prefecture	2004	1.87912	1.97066	1.92354	1.96231	1.99482
Kizilsu Kirgiz Autonomous Prefecture	2005	1.84766	1.96071	1.88957	1.96197	1.98823
Kizilsu Kirgiz Autonomous Prefecture	2006	1	1.84326	1.69006	1.93826	1.92596
Kizilsu Kirgiz Autonomous Prefecture	2007	1.83887	1.82947	1.70129	1.92552	1.9615
Kizilsu Kirgiz Autonomous Prefecture	2008	1.89989	1.8638	1.60981	1.92888	1.93174
Kizilsu Kirgiz Autonomous Prefecture	2009	1.95406	1.852	1.91716	1.96762	1.84472
Kizilsu Kirgiz Autonomous Prefecture	2010	1.06778	1.93482	1.89613	1.94428	1.93362
Kizilsu Kirgiz Autonomous Prefecture	2011	1.85548	1.91743	1.7909	1.96642	1.54515
Kizilsu Kirgiz Autonomous Prefecture	2012	1.86101	1.91177	1.95179	1.96863	1.60543
Kizilsu Kirgiz Autonomous Prefecture	2013	1.87932	1.93622	1.95475	1.97565	1.38781
Kizilsu Kirgiz Autonomous Prefecture	2014	1.88044	1.9406	1.98827	1.99482	1.52644
Kizilsu Kirgiz Autonomous Prefecture	2015	1.96279	1.98065	1.99999	1.99871	1.41808
Kizilsu Kirgiz Autonomous Prefecture	2016	1.98567	1.9923	1.99745	1.99962	1.33177
Kizilsu Kirgiz Autonomous Prefecture	2017	1.98831	1.99476	1.99772	1.99999	1.5386
Kizilsu Kirgiz Autonomous Prefecture	2018	1.99	1.99647	1.99794	1.99984	1.37968
Kashgar Administrative Offices	2000	1.9933	1.98642	1.84253	1.99919	2
Kashgar Administrative Offices	2001	1.98974	1.96531	1.89642	1.92468	1.99185
Kashgar Administrative Offices	2002	1.97517	1.966	1.89213	1.93451	1.99724
Kashgar Administrative Offices	2003	1.96319	1.95374	1.89678	1.96011	1.99647
Kashgar Administrative Offices	2004	1.9583	1.94695	1.8913	1.97198	1.9957
Kashgar Administrative Offices	2005	1.93673	1.92963	1.87242	1.97282	1.9924
Kashgar Administrative Offices	2006	1.99261	1.91178	1.8752	1.95382	1.94884
Kashgar Administrative Offices	2007	1.99749	1.9455	1.86932	1.96762	1.9471
Kashgar Administrative Offices	2008	1.96662	1.9469	1.90724	1.98197	1.99496
Kashgar Administrative Offices	2009	1.98189	1.94417	1.92448	1.97951	1.98805
Kashgar Administrative Offices	2010	1.91152	1.9364	1.8655	1.96019	1.97319
Kashgar Administrative Offices	2011	1.92923	1.89917	1.90839	1.95593	1.969
Kashgar Administrative Offices	2012	1.89602	1.91106	1.93175	1.96204	1.97115
Kashgar Administrative Offices	2013	1.84754	1.91801	1.96145	1.97132	1.87779
Kashgar Administrative Offices	2014	1.87874	1.95943	1.94721	1.9669	1.89275
Kashgar Administrative Offices	2015	1.92734	1.97219	1.96625	1.97761	1.98426
Kashgar Administrative Offices	2016	1.9616	1.98666	1.98868	1.99401	1.98833
Kashgar Administrative Offices	2017	1.95863	1.99173	1.99042	1.99607	1.98902
Kashgar Administrative Offices	2018	1.96414	1.99208	1.99422	1.99542	1.98181
Hotan Administrative Offices	2000	1.97469	1.93809	1.9348	1.99119	1.98429
Hotan Administrative Offices	2001	1.9569	1.89557	1.94074	1.99165	1.95045
Hotan Administrative Offices	2002	1.95087	1.92415	1.93366	1.98689	1.95433
Hotan Administrative Offices	2003	1.95994	1.94565	1.95134	1.98207	1.99779
Hotan Administrative Offices	2004	1.95577	1.95604	1.94136	1.98103	1.99416
Hotan Administrative Offices	2005	1.95925	1.96422	1.96386	1.98687	1.99725
Hotan Administrative Offices	2006	1.67075	1.92404	1.97929	1.99046	1.99993
Hotan Administrative Offices	2007	1.6447	1.96652	1.97208	1.99391	1.99916
Hotan Administrative Offices	2008	1.94235	1.9777	1.98629	1.9928	1.99851
Hotan Administrative Offices	2009	1.65669	1.97802	1.9829	1.99726	1.99535
Hotan Administrative Offices	2010	1.90132	1.97909	1.98694	1.99472	1.99798
Hotan Administrative Offices	2011	1.95922	1.96942	1.98455	1.98406	1.99173
Hotan Administrative Offices	2012	1.91871	1.88229	1.98823	1.9931	1.9851
Hotan Administrative Offices	2013	1.8873	1.97451	1.99309	1.9936	1.98547
Hotan Administrative Offices	2014	1.73108	1.97693	1.99506	1.99565	1.98355
Hotan Administrative Offices	2015	1.74834	1.84408	1.9958	1.99581	1.98434
Hotan Administrative Offices	2016	1.84079	1.96147	1.99649	1.99873	1.98262
Hotan Administrative Offices	2017	1.66517	1.99254	1.99693	1.99537	1.99037
Hotan Administrative Offices	2018	1.74837	1.99066	1.99888	1.99577	1.99495
sum		495.432	493.046	478.159	493.366	501.761
Rij
Urumqi City	2000	0.00377477	0.00365678	0.00310985	0.00401072	0.00389434
Urumqi City	2001	0.00367534	0.00353256	0.00296937	0.00395472	0.00386021
Urumqi City	2002	0.00368529	0.00356226	0.00312134	0.00396494	0.00386527
Urumqi City	2003	0.00372651	0.00361608	0.00336264	0.00398709	0.00386167
Urumqi City	2004	0.00373799	0.0036186	0.00341599	0.00399522	0.00387246
Urumqi City	2005	0.00373038	0.00363012	0.00353862	0.00399234	0.00387585
Urumqi City	2006	0.0037237	0.00358274	0.00356169	0.00396789	0.00390528
Urumqi City	2007	0.00367765	0.00362615	0.00360409	0.00393864	0.00386605
Urumqi City	2008	0.00368997	0.00368257	0.0035875	0.00396662	0.00387265
Urumqi City	2009	0.00379756	0.00377996	0.00364782	0.00397311	0.00388401
Urumqi City	2010	0.00373013	0.00384601	0.00372471	0.00399479	0.00387155
Urumqi City	2011	0.00363511	0.00380325	0.00385475	0.00399705	0.0038415
Urumqi City	2012	0.00365859	0.00386357	0.00384925	0.00401335	0.00382547
Urumqi City	2013	0.00372349	0.00395913	0.0039369	0.00402317	0.00386598
Urumqi City	2014	0.00370793	0.00397425	0.00396243	0.00402894	0.00389423
Urumqi City	2015	0.00381272	0.0039992	0.00403902	0.00403072	0.00391987
Urumqi City	2016	0.00386424	0.00402415	0.00401189	0.00403792	0.0039258
Urumqi City	2017	0.00381593	0.00403339	0.00406622	0.00404212	0.00391758
Urumqi City	2018	0.00385131	0.00405642	0.00409477	0.00404453	0.00391991
Karamay City	2000	0.00375215	0.00394922	0.00288517	0.00359447	0.00396526
Karamay City	2001	0.00373474	0.00392381	0.00289101	0.00373868	0.00396992
Karamay City	2002	0.00376665	0.00392954	0.00301775	0.00392581	0.00396954
Karamay City	2003	0.00371227	0.00391665	0.00316343	0.00395729	0.0039677
Karamay City	2004	0.00368577	0.00378674	0.00344299	0.00396886	0.00396505
Karamay City	2005	0.00365875	0.00379161	0.0035412	0.00398277	0.00396389
Karamay City	2006	0.00370731	0.00381627	0.00377853	0.00400086	0.00395919
Karamay City	2007	0.00375205	0.00385545	0.00370458	0.00399333	0.00396625
Karamay City	2008	0.00376504	0.00387431	0.00375241	0.00401515	0.00396654
Karamay City	2009	0.00370332	0.00370262	0.00378525	0.00401725	0.00396611
Karamay City	2010	0.00362652	0.00374083	0.00378545	0.00401251	0.00393386
Karamay City	2011	0.00363936	0.00372554	0.00378949	0.00401204	0.0039616
Karamay City	2012	0.00361471	0.00374795	0.00379665	0.00400663	0.00394402
Karamay City	2013	0.00359444	0.00378746	0.00318218	0.00401041	0.00395444
Karamay City	2014	0.00358711	0.00386749	0.0038063	0.00402069	0.00394437
Karamay City	2015	0.00363022	0.00393564	0.00389125	0.00402347	0.00394454
Karamay City	2016	0.00366536	0.00399944	0.00387991	0.00402639	0.00393548
Karamay City	2017	0.00369484	0.00402308	0.00393026	0.00403701	0.00393302
Karamay City	2018	0.00371849	0.00402848	0.00393272	0.00403429	0.00393656
Turpan City	2000	0.00399035	0.00395329	0.00410345	0.00402222	0.00395563
Turpan City	2001	0.00385657	0.00391273	0.00409318	0.0039894	0.00381022
Turpan City	2002	0.00386642	0.00392225	0.00411365	0.00401152	0.0038704
Turpan City	2003	0.00390616	0.00390298	0.00412038	0.00402847	0.00388785
Turpan City	2004	0.00373108	0.00356461	0.00412132	0.00403956	0.00390304
Turpan City	2005	0.00371867	0.00362648	0.0041348	0.00404293	0.00390503
Turpan City	2006	0.0039512	0.003775	0.00412698	0.00404412	0.0039016
Turpan City	2007	0.00372043	0.00339673	0.00417562	0.0040479	0.00384783
Turpan City	2008	0.00382019	0.00349556	0.00418081	0.00404054	0.00383843
Turpan City	2009	0.00383951	0.00369564	0.00409245	0.00404556	0.00375404
Turpan City	2010	0.00378785	0.00376546	0.00417355	0.00404188	0.00382894
Turpan City	2011	0.00375441	0.00378939	0.00416878	0.00404739	0.00371297
Turpan City	2012	0.00366189	0.00381281	0.00416848	0.00404325	0.00362608
Turpan City	2013	0.00343009	0.00357092	0.0041286	0.00402222	0.00370198
Turpan City	2014	0.0036414	0.00384469	0.00414858	0.0039833	0.00371293
Turpan City	2015	0.00369492	0.00359833	0.00417298	0.00403088	0.00381292
Turpan City	2016	0.00367339	0.00392146	0.00417044	0.00405168	0.00380065
Turpan City	2017	0.00336764	0.0039429	0.00418271	0.00405379	0.00376086
Turpan City	2018	0.00350791	0.00399328	0.00417786	0.0040522	0.00375975
Hami City	2000	0.00380286	0.00347196	0.00358272	0.00399526	0.00385391
Hami City	2001	0.00375909	0.00345787	0.00328539	0.0039653	0.00383939
Hami City	2002	0.00369862	0.00341748	0.00303713	0.00366738	0.00383504
Hami City	2003	0.00367469	0.00306064	0.00296588	0.00377704	0.00372802
Hami City	2004	0.00334876	0.00213187	0.00251923	0.00390163	0.00348879
Hami City	2005	0.00330321	0.00220997	0.00265544	0.00391441	0.0032986
Hami City	2006	0.00356877	0.00282056	0.00304094	0.00400544	0.00331236
Hami City	2007	0.00347891	0.00277713	0.00209136	0.00386935	0.00308818
Hami City	2008	0.00360756	0.00229687	0.00328407	0.00392248	0.00269669
Hami City	2009	0.00359074	0.00280727	0.00342685	0.00398167	0.00284498
Hami City	2010	0.0036087	0.00311193	0.00346514	0.00399183	0.00302793
Hami City	2011	0.00373019	0.00327101	0.00399806	0.0040414	0.00330616
Hami City	2012	0.00350398	0.00337246	0.00390691	0.00402423	0.00262851
Hami City	2013	0.00359159	0.00359059	0.00391115	0.00403047	0.00255594
Hami City	2014	0.00358755	0.00357399	0.00389709	0.00397504	0.00319084
Hami City	2015	0.00331455	0.00355116	0.00406777	0.00400955	0.0030574
Hami City	2016	0.00334085	0.00368171	0.00412943	0.00404779	0.00309965
Hami City	2017	0.00299002	0.0038016	0.00415097	0.0040494	0.00319715
Hami City	2018	0.00318548	0.00391457	0.00414463	0.00404789	0.00310981
Changji Hui Autonomous Prefecture	2000	0.00371945	0.00351142	0.00328359	0.00299996	0.00394099
Changji Hui Autonomous Prefecture	2001	0.00377868	0.0035227	0.00326386	0.00372992	0.0038966
Changji Hui Autonomous Prefecture	2002	0.00375294	0.00358304	0.00348316	0.00374678	0.00375686
Changji Hui Autonomous Prefecture	2003	0.00367463	0.0035201	0.00352196	0.003149	0.00378407
Changji Hui Autonomous Prefecture	2004	0.00376259	0.00354122	0.00343827	0.0035442	0.00388556
Changji Hui Autonomous Prefecture	2005	0.00373763	0.00350298	0.00333291	0.00342807	0.00390406
Changji Hui Autonomous Prefecture	2006	0.00376402	0.00370111	0.00346587	0.00359327	0.00391369
Changji Hui Autonomous Prefecture	2007	0.00374528	0.00366521	0.00364083	0.00376233	0.00391878
Changji Hui Autonomous Prefecture	2008	0.00371567	0.00367065	0.00356432	0.0037142	0.00390878
Changji Hui Autonomous Prefecture	2009	0.00378533	0.00362488	0.00360215	0.00372488	0.00392403
Changji Hui Autonomous Prefecture	2010	0.00369826	0.00370336	0.00366228	0.00372425	0.0038806
Changji Hui Autonomous Prefecture	2011	0.00376548	0.00366147	0.00375036	0.00383121	0.00390736
Changji Hui Autonomous Prefecture	2012	0.00368488	0.00382619	0.00379024	0.00376173	0.00360997
Changji Hui Autonomous Prefecture	2013	0.00343686	0.00375597	0.0038412	0.00379197	0.00362236
Changji Hui Autonomous Prefecture	2014	0.00352715	0.00369737	0.00397424	0.00383868	0.00380608
Changji Hui Autonomous Prefecture	2015	0.00352203	0.0037968	0.00404287	0.00385438	0.00377751
Changji Hui Autonomous Prefecture	2016	0.00336476	0.00396889	0.00401486	0.00400433	0.00381676
Changji Hui Autonomous Prefecture	2017	0.00337447	0.00398778	0.00404649	0.00402262	0.00381919
Changji Hui Autonomous Prefecture	2018	0.00333506	0.00398628	0.00407422	0.004017	0.00380743
prefectures and cities directly under Ili Kazak Autonomous Prefecture	2000	0.00403688	0.0040183	0.00389904	0.00271201	0.00397827
prefectures and cities directly under Ili Kazak Autonomous Prefecture	2001	0.00394925	0.00386429	0.0038962	0.00336055	0.00380182
Counties (Cities) Direct Under Ili Prefecture	2002	0.00382863	0.00370254	0.00378321	0.00327208	0.00384553
Counties (Cities) Direct Under Ili Prefecture	2003	0.00383369	0.00371213	0.00371181	0.00321586	0.00389882
Counties (Cities) Direct Under Ili Prefecture	2004	0.00380806	0.00374597	0.00365184	0.00323525	0.00391581
Counties (Cities) Direct Under Ili Prefecture	2005	0.00381534	0.00371083	0.00363696	0.00327013	0.00390916
Counties (Cities) Direct Under Ili Prefecture	2006	0.00373215	0.00359992	0.00370348	0.00342928	0.00390508
Counties (Cities) Direct Under Ili Prefecture	2007	0.00372838	0.00375324	0.00353252	0.00300921	0.0038861
Counties (Cities) Direct Under Ili Prefecture	2008	0.00372127	0.00375543	0.00348192	0.0033088	0.00389487
Counties (Cities) Direct Under Ili Prefecture	2009	0.00366097	0.00376235	0.00356317	0.00352057	0.00389507
Counties (Cities) Direct Under Ili Prefecture	2010	0.00364877	0.0038138	0.00360022	0.00351881	0.0038756
Counties (Cities) Direct Under Ili Prefecture	2011	0.00383549	0.00385611	0.00385691	0.00374329	0.00382171
Counties (Cities) Direct Under Ili Prefecture	2012	0.00375932	0.00385343	0.00385545	0.00395413	0.00380226
Counties (Cities) Direct Under Ili Prefecture	2013	0.00359981	0.00380597	0.00390482	0.00395919	0.00366928
Counties (Cities) Direct Under Ili Prefecture	2014	0.00339693	0.00385201	0.00392495	0.00391276	0.00380258
Counties (Cities) Direct Under Ili Prefecture	2015	0.00373771	0.00390644	0.00398731	0.00394033	0.0038876
Counties (Cities) Direct Under Ili Prefecture	2016	0.00373355	0.00399841	0.00402462	0.00404453	0.00380549
Counties (Cities) Direct Under Ili Prefecture	2017	0.00381362	0.00403177	0.00402577	0.00403413	0.00361962
Counties (Cities) Direct Under Ili Prefecture	2018	0.003668	0.00403637	0.00404899	0.00404276	0.00372613
Tarbagatai Administrative Offices	2000	0.0039868	0.00393147	0.00404901	0.00386272	0.00396795
Tarbagatai Administrative Offices	2001	0.00399176	0.0040174	0.00400351	0.00377336	0.00396881
Tarbagatai Administrative Offices	2002	0.0039654	0.00400032	0.0039836	0.00372025	0.00395889
Tarbagatai Administrative Offices	2003	0.00390004	0.00397494	0.0039506	0.00380694	0.00396135
Tarbagatai Administrative Offices	2004	0.00389635	0.00396523	0.00380048	0.00380375	0.00396846
Tarbagatai Administrative Offices	2005	0.00388782	0.00394424	0.00370699	0.00368409	0.0039702
Tarbagatai Administrative Offices	2006	0.00394941	0.00386285	0.0038611	0.00348661	0.00396365
Tarbagatai Administrative Offices	2007	0.00394747	0.0038758	0.00374881	0.00342287	0.00395356
Tarbagatai Administrative Offices	2008	0.00394328	0.00388406	0.00371906	0.00341902	0.00393465
Tarbagatai Administrative Offices	2009	0.00386453	0.00390331	0.00382475	0.00333036	0.00394932
Tarbagatai Administrative Offices	2010	0.00400147	0.00394742	0.00374594	0.00327282	0.00393873
Tarbagatai Administrative Offices	2011	0.00392872	0.00389781	0.00376843	0.00350824	0.00391068
Tarbagatai Administrative Offices	2012	0.003892	0.0039552	0.00393209	0.00386465	0.00390328
Tarbagatai Administrative Offices	2013	0.00385351	0.00396688	0.00400688	0.00389176	0.00389812
Tarbagatai Administrative Offices	2014	0.00384335	0.0039713	0.00399378	0.00388421	0.00392198
Tarbagatai Administrative Offices	2015	0.00387307	0.00402365	0.00397791	0.00398804	0.00393625
Tarbagatai Administrative Offices	2016	0.00392355	0.00404277	0.00397413	0.0040299	0.00393805
Tarbagatai Administrative Offices	2017	0.00396921	0.00405195	0.00404379	0.00404018	0.00393407
Tarbagatai Administrative Offices	2018	0.00395232	0.00405473	0.00402434	0.00403675	0.00392857
Altay Administrative Offices	2000	0.00383734	0.00315328	0.00293919	0.00291289	0.0037485
Altay Administrative Offices	2001	0.003903	0.00350484	0.00304744	0.00308877	0.00376318
Altay Administrative Offices	2002	0.00395095	0.00356797	0.00315281	0.0029684	0.00383421
Altay Administrative Offices	2003	0.0039427	0.00359818	0.00326463	0.0028991	0.00374509
Altay Administrative Offices	2004	0.00371653	0.00358582	0.00325508	0.0027918	0.00369266
Altay Administrative Offices	2005	0.00386696	0.00347399	0.00336231	0.00306278	0.00362365
Altay Administrative Offices	2006	0.00388914	0.00281189	0.00358779	0.0026327	0.00353684
Altay Administrative Offices	2007	0.00387291	0.00255114	0.00337512	0.00359526	0.00336617
Altay Administrative Offices	2008	0.00376131	0.00283615	0.0038464	0.00361677	0.00350657
Altay Administrative Offices	2009	0.00373946	0.00283454	0.00394602	0.00399795	0.00286443
Altay Administrative Offices	2010	0.0038252	0.00285102	0.00394917	0.0039413	0.0024726
Altay Administrative Offices	2011	0.00378985	0.00225476	0.00366257	0.00389839	0.00199298
Altay Administrative Offices	2012	0.00378657	0.00202821	0.00395237	0.00392655	0.00231323
Altay Administrative Offices	2013	0.00376745	0.00213778	0.00389579	0.0040067	0.0023523
Altay Administrative Offices	2014	0.0038332	0.0026462	0.00388353	0.00400217	0.00248252
Altay Administrative Offices	2015	0.00389041	0.00242856	0.00394439	0.0040098	0.00267406
Altay Administrative Offices	2016	0.00389318	0.00387553	0.00396259	0.00400702	0.00285893
Altay Administrative Offices	2017	0.00391144	0.00385818	0.002969	0.00399176	0.00284772
Altay Administrative Offices	2018	0.00391459	0.00385276	0.00354833	0.00399419	0.00281014
Bortala Mongolian Autonomous Prefecture	2000	0.00394661	0.00377598	0.00372709	0.00299134	0.00387011
Bortala Mongolian Autonomous Prefecture	2001	0.00398393	0.00389573	0.00366802	0.00341698	0.00384805
Bortala Mongolian Autonomous Prefecture	2002	0.00383257	0.00381266	0.00329026	0.00345186	0.00379382
Bortala Mongolian Autonomous Prefecture	2003	0.00384342	0.00381015	0.00325322	0.00337786	0.00385657
Bortala Mongolian Autonomous Prefecture	2004	0.00373586	0.00377366	0.00335247	0.00335099	0.00386122
Bortala Mongolian Autonomous Prefecture	2005	0.00381113	0.00379889	0.00348698	0.0034331	0.00396212
Bortala Mongolian Autonomous Prefecture	2006	0.00384808	0.00379937	0.00365324	0.00360259	0.0039569
Bortala Mongolian Autonomous Prefecture	2007	0.00388122	0.00381295	0.00373276	0.00296898	0.00390598
Bortala Mongolian Autonomous Prefecture	2008	0.00387733	0.00387445	0.00376444	0.00297226	0.00392344
Bortala Mongolian Autonomous Prefecture	2009	0.0038502	0.00381927	0.00370588	0.00298495	0.00394687
Bortala Mongolian Autonomous Prefecture	2010	0.0037016	0.00384865	0.00352282	0.00202689	0.00395487
Bortala Mongolian Autonomous Prefecture	2011	0.0036749	0.00389203	0.00344513	0.00229894	0.00394944
Bortala Mongolian Autonomous Prefecture	2012	0.00385757	0.00387148	0.00355747	0.00270322	0.00393278
Bortala Mongolian Autonomous Prefecture	2013	0.00385303	0.00388274	0.00392048	0.00345592	0.00395208
Bortala Mongolian Autonomous Prefecture	2014	0.00388596	0.00388443	0.00385717	0.00355162	0.00395092
Bortala Mongolian Autonomous Prefecture	2015	0.00389774	0.0039883	0.00389032	0.00364091	0.00396828
Bortala Mongolian Autonomous Prefecture	2016	0.00389876	0.00399789	0.00403382	0.00403736	0.00396873
Bortala Mongolian Autonomous Prefecture	2017	0.00388241	0.00402423	0.00408709	0.00404097	0.00396409
Bortala Mongolian Autonomous Prefecture	2018	0.00391158	0.00403065	0.00410575	0.00404299	0.00396393
Bayangol Mongolian Autonomous Prefecture	2000	0.00395108	0.00389402	0.00275316	0.00252471	0.00385523
Bayangol Mongolian Autonomous Prefecture	2001	0.00394428	0.00392763	0.00335949	0.00332728	0.00396875
Bayangol Mongolian Autonomous Prefecture	2002	0.00398101	0.00391965	0.0033528	0.00342153	0.00381766
Bayangol Mongolian Autonomous Prefecture	2003	0.0039587	0.00389991	0.00338674	0.00330662	0.00383318
Bayangol Mongolian Autonomous Prefecture	2004	0.00379345	0.00380187	0.00302829	0.00286522	0.0038499
Bayangol Mongolian Autonomous Prefecture	2005	0.00384617	0.00381792	0.00315835	0.00241473	0.00387282
Bayangol Mongolian Autonomous Prefecture	2006	0.00388845	0.00391893	0.00325404	0.00271453	0.00386229
Bayangol Mongolian Autonomous Prefecture	2007	0.00391638	0.00388194	0.00340095	0.00265348	0.00389429
Bayangol Mongolian Autonomous Prefecture	2008	0.00395537	0.00389027	0.0032603	0.00291714	0.00389204
Bayangol Mongolian Autonomous Prefecture	2009	0.00391127	0.00391744	0.00314778	0.00297853	0.00387154
Bayangol Mongolian Autonomous Prefecture	2010	0.00379425	0.00384992	0.00302529	0.00276111	0.0038173
Bayangol Mongolian Autonomous Prefecture	2011	0.00375832	0.00383358	0.00324508	0.00294434	0.00384229
Bayangol Mongolian Autonomous Prefecture	2012	0.00322818	0.00381149	0.00301324	0.00283283	0.00383434
Bayangol Mongolian Autonomous Prefecture	2013	0.00366228	0.00381329	0.00308829	0.00283493	0.00387196
Bayangol Mongolian Autonomous Prefecture	2014	0.00380152	0.00388988	0.00313165	0.00301015	0.00387337
Bayangol Mongolian Autonomous Prefecture	2015	0.00390048	0.00396919	0.00346815	0.00296797	0.00394736
Bayangol Mongolian Autonomous Prefecture	2016	0.00389481	0.00402082	0.00381444	0.0040221	0.00364675
Bayangol Mongolian Autonomous Prefecture	2017	0.00384229	0.00403386	0.00384984	0.00403095	0.00373979
Bayangol Mongolian Autonomous Prefecture	2018	0.00378234	0.00403455	0.00385742	0.0040272	0.00378105
Aksu Administrative Offices	2000	0.00395774	0.00393095	0.00408334	0.00395816	0.00396899
Aksu Administrative Offices	2001	0.00400382	0.00399398	0.00405446	0.00376136	0.00396697
Aksu Administrative Offices	2002	0.00385056	0.00396855	0.00400676	0.00370374	0.00393719
Aksu Administrative Offices	2003	0.00387008	0.00397367	0.00398648	0.00370422	0.00393164
Aksu Administrative Offices	2004	0.00380746	0.00375955	0.00390594	0.00378167	0.00392707
Aksu Administrative Offices	2005	0.00383063	0.00389604	0.00384405	0.00372478	0.00393019
Aksu Administrative Offices	2006	0.00360122	0.00375048	0.00390169	0.00356095	0.00388723
Aksu Administrative Offices	2007	0.00375245	0.00379116	0.00377699	0.00386149	0.00391835
Aksu Administrative Offices	2008	0.0037609	0.00383441	0.00373355	0.00375899	0.00393305
Aksu Administrative Offices	2009	0.00370687	0.00384829	0.0035812	0.0037223	0.00387739
Aksu Administrative Offices	2010	0.00368364	0.0038965	0.00369108	0.00381165	0.00390274
Aksu Administrative Offices	2011	0.00377208	0.00392242	0.00371229	0.00370876	0.00391657
Aksu Administrative Offices	2012	0.00359712	0.00390776	0.00375453	0.00369698	0.00388324
Aksu Administrative Offices	2013	0.00358569	0.00394502	0.00387211	0.00373136	0.00391163
Aksu Administrative Offices	2014	0.00369722	0.0039617	0.00393281	0.00376768	0.00389694
Aksu Administrative Offices	2015	0.00385966	0.00402533	0.00398269	0.00384186	0.00392559
Aksu Administrative Offices	2016	0.00393839	0.00405157	0.00405215	0.00404266	0.00394586
Aksu Administrative Offices	2017	0.00390437	0.00404817	0.00404663	0.00404297	0.00394564
Aksu Administrative Offices	2018	0.00389786	0.00405166	0.00406281	0.00404395	0.00394127
Kizilsu Kirgiz Autonomous Prefecture	2000	0.0038661	0.00378172	0.00252946	0.00383096	0.00392429
Kizilsu Kirgiz Autonomous Prefecture	2001	0.00375922	0.00391928	0.00364731	0.00346925	0.00393875
Kizilsu Kirgiz Autonomous Prefecture	2002	0.00388079	0.00391718	0.00401782	0.00402691	0.00395319
Kizilsu Kirgiz Autonomous Prefecture	2003	0.00387216	0.00395712	0.00405958	0.00403388	0.00396674
Kizilsu Kirgiz Autonomous Prefecture	2004	0.00379288	0.0039969	0.00402281	0.00397741	0.00397565
Kizilsu Kirgiz Autonomous Prefecture	2005	0.0037294	0.00397674	0.00395177	0.0039767	0.00396252
Kizilsu Kirgiz Autonomous Prefecture	2006	0.00201844	0.00373851	0.00353453	0.00392866	0.00383841
Kizilsu Kirgiz Autonomous Prefecture	2007	0.00371164	0.00371055	0.003558	0.00390284	0.00390923
Kizilsu Kirgiz Autonomous Prefecture	2008	0.00383481	0.00378018	0.00336669	0.00390963	0.00384993
Kizilsu Kirgiz Autonomous Prefecture	2009	0.00394415	0.00375624	0.00400946	0.00398816	0.0036765
Kizilsu Kirgiz Autonomous Prefecture	2010	0.00215525	0.00392423	0.00396547	0.00394086	0.00385368
Kizilsu Kirgiz Autonomous Prefecture	2011	0.00374518	0.00388895	0.00374542	0.00398573	0.00307945
Kizilsu Kirgiz Autonomous Prefecture	2012	0.00375634	0.00387748	0.00408189	0.0039902	0.0031996
Kizilsu Kirgiz Autonomous Prefecture	2013	0.0037933	0.00392706	0.00408808	0.00400443	0.00276588
Kizilsu Kirgiz Autonomous Prefecture	2014	0.00379555	0.00393595	0.00415818	0.0040433	0.00304218
Kizilsu Kirgiz Autonomous Prefecture	2015	0.00396178	0.00401717	0.00418269	0.00405117	0.0028262
Kizilsu Kirgiz Autonomous Prefecture	2016	0.00400795	0.0040408	0.00417739	0.00405302	0.0026542
Kizilsu Kirgiz Autonomous Prefecture	2017	0.00401329	0.0040458	0.00417794	0.00405376	0.00306641
Kizilsu Kirgiz Autonomous Prefecture	2018	0.00401669	0.00404925	0.00417841	0.00405347	0.00274968
Kashgar Administrative Offices	2000	0.00402336	0.00402888	0.00385338	0.00405215	0.00398596
Kashgar Administrative Offices	2001	0.00401616	0.00398605	0.00396608	0.00390112	0.00396972
Kashgar Administrative Offices	2002	0.00398676	0.00398747	0.00395711	0.00392104	0.00398046
Kashgar Administrative Offices	2003	0.00396258	0.00396259	0.00396684	0.00397294	0.00397894
Kashgar Administrative Offices	2004	0.00395271	0.00394883	0.00395538	0.00399699	0.00397739
Kashgar Administrative Offices	2005	0.00390918	0.00391369	0.00391589	0.0039987	0.00397082
Kashgar Administrative Offices	2006	0.00402197	0.00387749	0.00392172	0.00396018	0.003884
Kashgar Administrative Offices	2007	0.00403182	0.00394588	0.00390942	0.00398816	0.00388054
Kashgar Administrative Offices	2008	0.00396951	0.00394871	0.00398871	0.00401724	0.00397593
Kashgar Administrative Offices	2009	0.00400032	0.00394319	0.00402478	0.00401225	0.00396216
Kashgar Administrative Offices	2010	0.00385829	0.00392742	0.00390143	0.00397311	0.00393253
Kashgar Administrative Offices	2011	0.00389403	0.00385192	0.00399113	0.00396447	0.00392419
Kashgar Administrative Offices	2012	0.00382699	0.00387604	0.00403997	0.00397685	0.00392846
Kashgar Administrative Offices	2013	0.00372914	0.00389013	0.00410209	0.00399566	0.00374239
Kashgar Administrative Offices	2014	0.00379213	0.00397413	0.0040723	0.00398669	0.00377223
Kashgar Administrative Offices	2015	0.00389023	0.00400002	0.00411213	0.00400842	0.00395459
Kashgar Administrative Offices	2016	0.00395938	0.00402937	0.00415904	0.00404165	0.00396271
Kashgar Administrative Offices	2017	0.00395337	0.00403965	0.00416267	0.00404583	0.00396408
Kashgar Administrative Offices	2018	0.00396449	0.00404035	0.00417062	0.0040445	0.00394971
Hotan Administrative Offices	2000	0.00398579	0.00393085	0.00404635	0.00403592	0.00395465
Hotan Administrative Offices	2001	0.00394988	0.00384462	0.00405877	0.00403686	0.00388722
Hotan Administrative Offices	2002	0.00393772	0.00390259	0.00404397	0.00402722	0.00389495
Hotan Administrative Offices	2003	0.00395603	0.00394618	0.00408095	0.00401746	0.00398157
Hotan Administrative Offices	2004	0.0039476	0.00396726	0.00406007	0.00401534	0.00397432
Hotan Administrative Offices	2005	0.00395462	0.00398384	0.00410712	0.00402718	0.00398049
Hotan Administrative Offices	2006	0.00337232	0.00390236	0.0041394	0.00403446	0.00398583
Hotan Administrative Offices	2007	0.00331974	0.00398852	0.00412432	0.00404145	0.00398429
Hotan Administrative Offices	2008	0.00392051	0.00401118	0.00415404	0.00403921	0.003983
Hotan Administrative Offices	2009	0.00334393	0.00401183	0.00414696	0.00404824	0.00397669
Hotan Administrative Offices	2010	0.00383771	0.00401401	0.00415539	0.00404309	0.00398194
Hotan Administrative Offices	2011	0.00395457	0.00399439	0.0041504	0.00402148	0.00396948
Hotan Administrative Offices	2012	0.00387279	0.00381767	0.00415809	0.0040398	0.00395627
Hotan Administrative Offices	2013	0.00380941	0.00400471	0.00416827	0.00404081	0.00395702
Hotan Administrative Offices	2014	0.00349408	0.00400963	0.00417239	0.00404498	0.00395318
Hotan Administrative Offices	2015	0.00352891	0.00374018	0.00417393	0.00404529	0.00395475
Hotan Administrative Offices	2016	0.00371552	0.00397828	0.00417536	0.00405122	0.00395133
Hotan Administrative Offices	2017	0.00336104	0.00404128	0.00417628	0.00404441	0.00396676
Hotan Administrative Offices	2018	0.00352897	0.00403748	0.00418037	0.00404522	0.0039759
Rij*LNRij
Urumqi City	2000	-0.021061	-0.0205188	-0.0179537	-0.0221343	-0.0216067
Urumqi City	2001	-0.0206044	-0.0199439	-0.01728	-0.0218809	-0.0214513
Urumqi City	2002	-0.0206502	-0.0200818	-0.0180085	-0.0219272	-0.0214744
Urumqi City	2003	-0.0208397	-0.0203309	-0.0191503	-0.0220274	-0.021458
Urumqi City	2004	-0.0208924	-0.0203426	-0.0194004	-0.0220642	-0.0215071
Urumqi City	2005	-0.0208575	-0.0203958	-0.019972	-0.0220512	-0.0215226
Urumqi City	2006	-0.0208268	-0.0201766	-0.0200791	-0.0219405	-0.0216564
Urumqi City	2007	-0.020615	-0.0203775	-0.0202755	-0.0218079	-0.0214779
Urumqi City	2008	-0.0206717	-0.0206376	-0.0201987	-0.0219348	-0.021508
Urumqi City	2009	-0.0211653	-0.0210848	-0.0204775	-0.0219642	-0.0215597
Urumqi City	2010	-0.0208563	-0.0213866	-0.0208314	-0.0220623	-0.021503
Urumqi City	2011	-0.0204189	-0.0211913	-0.0214264	-0.0220725	-0.021366
Urumqi City	2012	-0.0205272	-0.0214666	-0.0214013	-0.0221462	-0.0212929
Urumqi City	2013	-0.0208258	-0.0219009	-0.0218	-0.0221905	-0.0214776
Urumqi City	2014	-0.0207543	-0.0219693	-0.0219158	-0.0222166	-0.0216062
Urumqi City	2015	-0.0212346	-0.0220822	-0.0222621	-0.0222246	-0.0217227
Urumqi City	2016	-0.0214697	-0.0221949	-0.0221396	-0.0222571	-0.0217497
Urumqi City	2017	-0.0212493	-0.0222367	-0.0223847	-0.0222761	-0.0217123
Urumqi City	2018	-0.0214108	-0.0223405	-0.0225132	-0.022287	-0.0217229
Karamay City	2000	-0.0209574	-0.0218559	-0.016873	-0.0202309	-0.0219286
Karamay City	2001	-0.0208775	-0.0217406	-0.0169013	-0.0208956	-0.0219497
Karamay City	2002	-0.0210238	-0.0217666	-0.0175128	-0.0217497	-0.021948
Karamay City	2003	-0.0207743	-0.0217081	-0.018209	-0.0218925	-0.0219397
Karamay City	2004	-0.0206524	-0.0211158	-0.0195266	-0.0219449	-0.0219276
Karamay City	2005	-0.0205279	-0.0211381	-0.019984	-0.0220079	-0.0219224
Karamay City	2006	-0.0207515	-0.0212508	-0.0210782	-0.0220897	-0.0219011
Karamay City	2007	-0.0209569	-0.0214296	-0.0207389	-0.0220557	-0.0219331
Karamay City	2008	-0.0210164	-0.0215156	-0.0209586	-0.0221543	-0.0219344
Karamay City	2009	-0.0207331	-0.0207299	-0.021109	-0.0221638	-0.0219325
Karamay City	2010	-0.0203792	-0.0209054	-0.0211099	-0.0221424	-0.0217862
Karamay City	2011	-0.0204385	-0.0208352	-0.0211284	-0.0221403	-0.021912
Karamay City	2012	-0.0203246	-0.0209381	-0.0211611	-0.0221158	-0.0218324
Karamay City	2013	-0.0202308	-0.0211191	-0.0182981	-0.0221329	-0.0218796
Karamay City	2014	-0.0201969	-0.0214845	-0.0212053	-0.0221793	-0.0218339
Karamay City	2015	-0.0203963	-0.0217943	-0.0215926	-0.0221919	-0.0218347
Karamay City	2016	-0.0205584	-0.0220833	-0.021541	-0.0222051	-0.0217936
Karamay City	2017	-0.0206941	-0.0221901	-0.0217699	-0.022253	-0.0217824
Karamay City	2018	-0.0208029	-0.0222145	-0.0217811	-0.0222407	-0.0217985
Turpan City	2000	-0.0220422	-0.0218744	-0.0225523	-0.0221862	-0.021885
Turpan City	2001	-0.0214347	-0.0216903	-0.0225061	-0.0220379	-0.0212232
Turpan City	2002	-0.0214796	-0.0217335	-0.0225981	-0.0221379	-0.0214977
Turpan City	2003	-0.0216604	-0.021646	-0.0226283	-0.0222144	-0.0215772
Turpan City	2004	-0.0208607	-0.0200927	-0.0226326	-0.0222645	-0.0216463
Turpan City	2005	-0.0208037	-0.020379	-0.0226931	-0.0222797	-0.0216553
Turpan City	2006	-0.0218649	-0.0210621	-0.022658	-0.0222851	-0.0216397
Turpan City	2007	-0.0208118	-0.0193102	-0.0228761	-0.0223021	-0.0213949
Turpan City	2008	-0.0212687	-0.0197718	-0.0228993	-0.022269	-0.021352
Turpan City	2009	-0.0213569	-0.0206978	-0.0225028	-0.0222916	-0.020966
Turpan City	2010	-0.0211209	-0.0210184	-0.0228668	-0.022275	-0.0213087
Turpan City	2011	-0.0209677	-0.0211279	-0.0228455	-0.0222998	-0.0207775
Turpan City	2012	-0.0205424	-0.021235	-0.0228441	-0.0222812	-0.0203771
Turpan City	2013	-0.0194664	-0.0201219	-0.0226653	-0.0221863	-0.020727
Turpan City	2014	-0.0204479	-0.0213806	-0.0227549	-0.0220103	-0.0207773
Turpan City	2015	-0.0206945	-0.0202488	-0.0228643	-0.0222253	-0.0212355
Turpan City	2016	-0.0205954	-0.02173	-0.0228529	-0.0223192	-0.0211794
Turpan City	2017	-0.0191738	-0.0218272	-0.0229079	-0.0223287	-0.0209973
Turpan City	2018	-0.0198293	-0.0220555	-0.0228861	-0.0223215	-0.0209922
Hami City	2000	-0.0211896	-0.0196618	-0.0201766	-0.0220644	-0.0214226
Hami City	2001	-0.0209892	-0.0195961	-0.0187867	-0.0219288	-0.0213564
Hami City	2002	-0.0207115	-0.0194074	-0.0176058	-0.0205677	-0.0213365
Hami City	2003	-0.0206014	-0.0177185	-0.0172631	-0.0210714	-0.0208466
Hami City	2004	-0.0190851	-0.0131126	-0.0150746	-0.0216398	-0.0197403
Hami City	2005	-0.0188708	-0.0135135	-0.0157498	-0.0216979	-0.018849
Hami City	2006	-0.0201119	-0.016559	-0.017624	-0.0221104	-0.0189139
Hami City	2007	-0.0196942	-0.0163471	-0.0129035	-0.021493	-0.0178502
Hami City	2008	-0.0202915	-0.0139563	-0.0187805	-0.0217346	-0.0159529
Hami City	2009	-0.0202137	-0.0164942	-0.0194512	-0.0220029	-0.0166778
Hami City	2010	-0.0202968	-0.0179636	-0.01963	-0.0220489	-0.0175616
Hami City	2011	-0.0208566	-0.0187189	-0.0220771	-0.0222728	-0.0188847
Hami City	2012	-0.019811	-0.0191964	-0.0216638	-0.0221953	-0.0156169
Hami City	2013	-0.0202176	-0.020213	-0.0216831	-0.0222235	-0.0152573
Hami City	2014	-0.0201989	-0.0201361	-0.0216192	-0.0219729	-0.0183393
Hami City	2015	-0.0189242	-0.0200302	-0.0223917	-0.022129	-0.0177029
Hami City	2016	-0.019048	-0.0206337	-0.022669	-0.0223016	-0.017905
Hami City	2017	-0.0173794	-0.0211838	-0.0227656	-0.0223089	-0.0183692
Hami City	2018	-0.0183138	-0.0216987	-0.0227372	-0.0223021	-0.0179536
Changji Hui Autonomous Prefecture	2000	-0.0208073	-0.0198456	-0.0187782	-0.0174272	-0.0218186
Changji Hui Autonomous Prefecture	2001	-0.0210789	-0.0198981	-0.0186851	-0.0208554	-0.021617
Changji Hui Autonomous Prefecture	2002	-0.020961	-0.0201781	-0.019714	-0.0209327	-0.0209789
Changji Hui Autonomous Prefecture	2003	-0.0206011	-0.019886	-0.0198946	-0.0181404	-0.0211036
Changji Hui Autonomous Prefecture	2004	-0.0210052	-0.0199841	-0.0195046	-0.0199979	-0.0215668
Changji Hui Autonomous Prefecture	2005	-0.0208908	-0.0198064	-0.0190106	-0.0194569	-0.0216509
Changji Hui Autonomous Prefecture	2006	-0.0210118	-0.020723	-0.0196334	-0.0202254	-0.0216946
Changji Hui Autonomous Prefecture	2007	-0.0209259	-0.0205577	-0.0204453	-0.021004	-0.0217178
Changji Hui Autonomous Prefecture	2008	-0.0207899	-0.0205827	-0.0200913	-0.0207831	-0.0216724
Changji Hui Autonomous Prefecture	2009	-0.0211094	-0.0203716	-0.0202665	-0.0208322	-0.0217416
Changji Hui Autonomous Prefecture	2010	-0.0207099	-0.0207333	-0.0205442	-0.0208293	-0.0215442
Changji Hui Autonomous Prefecture	2011	-0.0210184	-0.0205405	-0.0209491	-0.0213191	-0.0216659
Changji Hui Autonomous Prefecture	2012	-0.0206483	-0.0212961	-0.0211318	-0.0210013	-0.0203027
Changji Hui Autonomous Prefecture	2013	-0.019498	-0.0209749	-0.0213647	-0.0211397	-0.0203599
Changji Hui Autonomous Prefecture	2014	-0.0199188	-0.0207058	-0.0219693	-0.0213532	-0.0212042
Changji Hui Autonomous Prefecture	2015	-0.0198949	-0.0211618	-0.0222795	-0.0214248	-0.0210736
Changji Hui Autonomous Prefecture	2016	-0.0191603	-0.0219451	-0.022153	-0.0221054	-0.0212531
Changji Hui Autonomous Prefecture	2017	-0.0192059	-0.0220306	-0.0222958	-0.0221881	-0.0212642
Changji Hui Autonomous Prefecture	2018	-0.0190207	-0.0220238	-0.0224208	-0.0221627	-0.0212105
prefectures and cities directly under Ili Kazak Autonomous Prefecture	2000	-0.0222524	-0.0221685	-0.0216281	-0.0160281	-0.0219875
prefectures and cities directly under Ili Kazak Autonomous Prefecture	2001	-0.0218561	-0.0214699	-0.0216151	-0.0191405	-0.0211848
Counties (Cities) Direct Under Ili Prefecture	2002	-0.0213073	-0.0207295	-0.0210997	-0.0187239	-0.0213844
Counties (Cities) Direct Under Ili Prefecture	2003	-0.0213304	-0.0207737	-0.0207721	-0.018458	-0.0216271
Counties (Cities) Direct Under Ili Prefecture	2004	-0.0212133	-0.020929	-0.020496	-0.0185498	-0.0217043
Counties (Cities) Direct Under Ili Prefecture	2005	-0.0212466	-0.0207676	-0.0204274	-0.0187147	-0.0216741
Counties (Cities) Direct Under Ili Prefecture	2006	-0.0208656	-0.0202562	-0.0207339	-0.0194626	-0.0216555
Counties (Cities) Direct Under Ili Prefecture	2007	-0.0208483	-0.0209624	-0.0199437	-0.0174717	-0.0215692
Counties (Cities) Direct Under Ili Prefecture	2008	-0.0208156	-0.0209724	-0.0197083	-0.0188971	-0.0216091
Counties (Cities) Direct Under Ili Prefecture	2009	-0.0205381	-0.0210041	-0.020086	-0.0198882	-0.02161
Counties (Cities) Direct Under Ili Prefecture	2010	-0.0204819	-0.0212395	-0.0202576	-0.01988	-0.0215214
Counties (Cities) Direct Under Ili Prefecture	2011	-0.0213386	-0.0214326	-0.0214363	-0.0209167	-0.0212757
Counties (Cities) Direct Under Ili Prefecture	2012	-0.0209902	-0.0214204	-0.0214296	-0.0218782	-0.0211868
Counties (Cities) Direct Under Ili Prefecture	2013	-0.0202557	-0.0212038	-0.0216543	-0.0219011	-0.0205764
Counties (Cities) Direct Under Ili Prefecture	2014	-0.0193112	-0.0214139	-0.0217458	-0.0216904	-0.0211883
Counties (Cities) Direct Under Ili Prefecture	2015	-0.0208911	-0.0216617	-0.0220285	-0.0218156	-0.021576
Counties (Cities) Direct Under Ili Prefecture	2016	-0.020872	-0.0220787	-0.0221971	-0.022287	-0.0212016
Counties (Cities) Direct Under Ili Prefecture	2017	-0.0212387	-0.0222294	-0.0222023	-0.02224	-0.0203473
Counties (Cities) Direct Under Ili Prefecture	2018	-0.0205705	-0.0222501	-0.022307	-0.0222789	-0.020838
Tarbagatai Administrative Offices	2000	-0.0220261	-0.0217754	-0.0223071	-0.0214628	-0.0219408
Tarbagatai Administrative Offices	2001	-0.0220486	-0.0221645	-0.0221017	-0.0210545	-0.0219447
Tarbagatai Administrative Offices	2002	-0.0219292	-0.0220873	-0.0220116	-0.020811	-0.0218998
Tarbagatai Administrative Offices	2003	-0.0216326	-0.0219725	-0.0218622	-0.0212082	-0.0219109
Tarbagatai Administrative Offices	2004	-0.0216159	-0.0219285	-0.0211786	-0.0211936	-0.0219431
Tarbagatai Administrative Offices	2005	-0.021577	-0.0218333	-0.02075	-0.0206447	-0.021951
Tarbagatai Administrative Offices	2006	-0.0218568	-0.0214634	-0.0214554	-0.0197301	-0.0219213
Tarbagatai Administrative Offices	2007	-0.021848	-0.0215223	-0.020942	-0.0194326	-0.0218756
Tarbagatai Administrative Offices	2008	-0.021829	-0.0215599	-0.0208055	-0.0194146	-0.0217898
Tarbagatai Administrative Offices	2009	-0.021471	-0.0216475	-0.0212896	-0.0189986	-0.0218564
Tarbagatai Administrative Offices	2010	-0.0220925	-0.0218478	-0.0209289	-0.0187274	-0.0218083
Tarbagatai Administrative Offices	2011	-0.0217629	-0.0216225	-0.021032	-0.0198308	-0.021681
Tarbagatai Administrative Offices	2012	-0.021596	-0.021883	-0.0217782	-0.0214715	-0.0216473
Tarbagatai Administrative Offices	2013	-0.0214208	-0.0219359	-0.0221169	-0.021595	-0.0216239
Tarbagatai Administrative Offices	2014	-0.0213745	-0.021956	-0.0220577	-0.0215606	-0.0217323
Tarbagatai Administrative Offices	2015	-0.0215099	-0.0221927	-0.0219859	-0.0220317	-0.0217971
Tarbagatai Administrative Offices	2016	-0.0217394	-0.022279	-0.0219688	-0.0222209	-0.0218053
Tarbagatai Administrative Offices	2017	-0.0219465	-0.0223204	-0.0222836	-0.0222673	-0.0217872
Tarbagatai Administrative Offices	2018	-0.02187	-0.0223329	-0.0221958	-0.0222519	-0.0217623
Altay Administrative Offices	2000	-0.021347	-0.0181607	-0.0171344	-0.0170072	-0.0209406
Altay Administrative Offices	2001	-0.0216461	-0.019815	-0.0176552	-0.0178531	-0.0210079
Altay Administrative Offices	2002	-0.0218638	-0.0201082	-0.0181585	-0.0172753	-0.0213327
Altay Administrative Offices	2003	-0.0218264	-0.0202481	-0.0186887	-0.0169405	-0.020925
Altay Administrative Offices	2004	-0.0207939	-0.0201909	-0.0186436	-0.0164188	-0.0206841
Altay Administrative Offices	2005	-0.0214821	-0.0196713	-0.0191488	-0.0177287	-0.0203659
Altay Administrative Offices	2006	-0.021583	-0.0165168	-0.0202	-0.0156376	-0.0199638
Altay Administrative Offices	2007	-0.0215092	-0.0152334	-0.0192089	-0.0202346	-0.0191669
Altay Administrative Offices	2008	-0.0209993	-0.0166349	-0.0213884	-0.0203341	-0.019823
Altay Administrative Offices	2009	-0.0208992	-0.0166271	-0.0218414	-0.0220766	-0.0167723
Altay Administrative Offices	2010	-0.0212916	-0.0167072	-0.0218557	-0.02182	-0.0148418
Altay Administrative Offices	2011	-0.02113	-0.0137421	-0.0205455	-0.0216251	-0.0123926
Altay Administrative Offices	2012	-0.021115	-0.0125761	-0.0218702	-0.0217531	-0.0140392
Altay Administrative Offices	2013	-0.0210275	-0.0131431	-0.0216133	-0.0221161	-0.014237
Altay Administrative Offices	2014	-0.0213281	-0.0157042	-0.0215575	-0.0220957	-0.0148913
Altay Administrative Offices	2015	-0.0215888	-0.0146211	-0.021834	-0.0221301	-0.0158415
Altay Administrative Offices	2016	-0.0216014	-0.0215211	-0.0219165	-0.0221176	-0.0167456
Altay Administrative Offices	2017	-0.0216844	-0.0214421	-0.0172782	-0.0220486	-0.0166912
Altay Administrative Offices	2018	-0.0216988	-0.0214173	-0.0200171	-0.0220596	-0.0165082
Bortala Mongolian Autonomous Prefecture	2000	-0.0218441	-0.0210666	-0.0208424	-0.0173858	-0.0214964
Bortala Mongolian Autonomous Prefecture	2001	-0.0220132	-0.021613	-0.0205706	-0.019405	-0.0213959
Bortala Mongolian Autonomous Prefecture	2002	-0.0213253	-0.0212343	-0.0188097	-0.019568	-0.0211482
Bortala Mongolian Autonomous Prefecture	2003	-0.0213748	-0.0212228	-0.0186348	-0.0192218	-0.0214347
Bortala Mongolian Autonomous Prefecture	2004	-0.0208826	-0.0210559	-0.0191026	-0.0190956	-0.0214559
Bortala Mongolian Autonomous Prefecture	2005	-0.0212273	-0.0211714	-0.0197318	-0.0194804	-0.0219144
Bortala Mongolian Autonomous Prefecture	2006	-0.021396	-0.0211736	-0.0205025	-0.0202685	-0.0218907
Bortala Mongolian Autonomous Prefecture	2007	-0.021547	-0.0212357	-0.0208684	-0.0172781	-0.0216596
Bortala Mongolian Autonomous Prefecture	2008	-0.0215293	-0.0215162	-0.0210137	-0.0172939	-0.021739
Bortala Mongolian Autonomous Prefecture	2009	-0.0214057	-0.0212645	-0.0207449	-0.017355	-0.0218453
Bortala Mongolian Autonomous Prefecture	2010	-0.0207252	-0.0213986	-0.0198986	-0.0125693	-0.0218816
Bortala Mongolian Autonomous Prefecture	2011	-0.0206024	-0.0215962	-0.0195366	-0.0139668	-0.0218569
Bortala Mongolian Autonomous Prefecture	2012	-0.0214393	-0.0215027	-0.0200595	-0.015985	-0.0217814
Bortala Mongolian Autonomous Prefecture	2013	-0.0214186	-0.0215539	-0.0217255	-0.019587	-0.0218689
Bortala Mongolian Autonomous Prefecture	2014	-0.0215686	-0.0215616	-0.0214374	-0.0200324	-0.0218636
Bortala Mongolian Autonomous Prefecture	2015	-0.0216222	-0.0220329	-0.0215884	-0.0204456	-0.0219423
Bortala Mongolian Autonomous Prefecture	2016	-0.0216268	-0.0220763	-0.0222386	-0.0222546	-0.0219443
Bortala Mongolian Autonomous Prefecture	2017	-0.0215524	-0.0221953	-0.0224787	-0.0222709	-0.0219233
Bortala Mongolian Autonomous Prefecture	2018	-0.0216851	-0.0222243	-0.0225626	-0.02228	-0.0219226
Bayangol Mongolian Autonomous Prefecture	2000	-0.0218644	-0.0216053	-0.0162299	-0.0151019	-0.0214286
Bayangol Mongolian Autonomous Prefecture	2001	-0.0218335	-0.021758	-0.0191356	-0.0189841	-0.0219444
Bayangol Mongolian Autonomous Prefecture	2002	-0.0219999	-0.0217217	-0.0191041	-0.0194263	-0.0212572
Bayangol Mongolian Autonomous Prefecture	2003	-0.0218989	-0.021632	-0.0192634	-0.0188868	-0.021328
Bayangol Mongolian Autonomous Prefecture	2004	-0.0211465	-0.021185	-0.0175633	-0.0167762	-0.0214043
Bayangol Mongolian Autonomous Prefecture	2005	-0.0213873	-0.0212584	-0.0181848	-0.0145516	-0.0215088
Bayangol Mongolian Autonomous Prefecture	2006	-0.0215799	-0.0217185	-0.0186387	-0.0160405	-0.0214608
Bayangol Mongolian Autonomous Prefecture	2007	-0.0217069	-0.0215503	-0.01933	-0.0157401	-0.0216065
Bayangol Mongolian Autonomous Prefecture	2008	-0.0218838	-0.0215882	-0.0186683	-0.0170278	-0.0215962
Bayangol Mongolian Autonomous Prefecture	2009	-0.0216837	-0.0217117	-0.0181346	-0.0173241	-0.021503
Bayangol Mongolian Autonomous Prefecture	2010	-0.0211502	-0.0214044	-0.0175489	-0.0162688	-0.0212555
Bayangol Mongolian Autonomous Prefecture	2011	-0.0209856	-0.0213299	-0.0185963	-0.0171592	-0.0213696
Bayangol Mongolian Autonomous Prefecture	2012	-0.0185163	-0.021229	-0.0174911	-0.0166188	-0.0213333
Bayangol Mongolian Autonomous Prefecture	2013	-0.0205442	-0.0212372	-0.0178508	-0.0166289	-0.0215048
Bayangol Mongolian Autonomous Prefecture	2014	-0.0211834	-0.0215864	-0.0180577	-0.0174762	-0.0215113
Bayangol Mongolian Autonomous Prefecture	2015	-0.0216346	-0.0219464	-0.0196441	-0.0172732	-0.0218475
Bayangol Mongolian Autonomous Prefecture	2016	-0.0216088	-0.0221799	-0.0212425	-0.0221857	-0.0204726
Bayangol Mongolian Autonomous Prefecture	2017	-0.0213696	-0.0222388	-0.021404	-0.0222257	-0.0209007
Bayangol Mongolian Autonomous Prefecture	2018	-0.0210957	-0.0222419	-0.0214386	-0.0222087	-0.0210898
Aksu Administrative Offices	2000	-0.0218945	-0.021773	-0.0224618	-0.0218965	-0.0219455
Aksu Administrative Offices	2001	-0.0221031	-0.0220586	-0.0223317	-0.0209996	-0.0219364
Aksu Administrative Offices	2002	-0.0214073	-0.0219435	-0.0221164	-0.020735	-0.0218013
Aksu Administrative Offices	2003	-0.0214963	-0.0219667	-0.0220247	-0.0207373	-0.0217762
Aksu Administrative Offices	2004	-0.0212106	-0.0209913	-0.0216594	-0.0210926	-0.0217554
Aksu Administrative Offices	2005	-0.0213164	-0.0216145	-0.0213777	-0.0208318	-0.0217696
Aksu Administrative Offices	2006	-0.0202622	-0.0209497	-0.0216401	-0.0200756	-0.0215743
Aksu Administrative Offices	2007	-0.0209587	-0.021136	-0.0210712	-0.0214571	-0.0217158
Aksu Administrative Offices	2008	-0.0209975	-0.0213337	-0.020872	-0.0209887	-0.0217826
Aksu Administrative Offices	2009	-0.0207495	-0.021397	-0.0201695	-0.0208204	-0.0215296
Aksu Administrative Offices	2010	-0.0206426	-0.0216165	-0.0206768	-0.0212297	-0.0216449
Aksu Administrative Offices	2011	-0.0210487	-0.0217343	-0.0207744	-0.0207581	-0.0217077
Aksu Administrative Offices	2012	-0.0202432	-0.0216677	-0.0209683	-0.020704	-0.0215562
Aksu Administrative Offices	2013	-0.0201903	-0.0218369	-0.0215055	-0.020862	-0.0216853
Aksu Administrative Offices	2014	-0.0207051	-0.0219125	-0.0217815	-0.0210285	-0.0216185
Aksu Administrative Offices	2015	-0.0214488	-0.0222003	-0.0220075	-0.0213677	-0.0217487
Aksu Administrative Offices	2016	-0.0218068	-0.0223187	-0.0223213	-0.0222785	-0.0218407
Aksu Administrative Offices	2017	-0.0216523	-0.0223033	-0.0222964	-0.0222799	-0.0218397
Aksu Administrative Offices	2018	-0.0216227	-0.0223191	-0.0223693	-0.0222843	-0.0218199
Kizilsu Kirgiz Autonomous Prefecture	2000	-0.0214782	-0.0210928	-0.0151255	-0.0213179	-0.0217428
Kizilsu Kirgiz Autonomous Prefecture	2001	-0.0209898	-0.02172	-0.0204752	-0.0196492	-0.0218084
Kizilsu Kirgiz Autonomous Prefecture	2002	-0.0215451	-0.0217105	-0.0221664	-0.0222074	-0.0218739
Kizilsu Kirgiz Autonomous Prefecture	2003	-0.0215057	-0.0218917	-0.0223548	-0.0222389	-0.0219353
Kizilsu Kirgiz Autonomous Prefecture	2004	-0.0211439	-0.0220718	-0.0221889	-0.0219836	-0.0219757
Kizilsu Kirgiz Autonomous Prefecture	2005	-0.0208529	-0.0219806	-0.0218675	-0.0219804	-0.0219162
Kizilsu Kirgiz Autonomous Prefecture	2006	-0.0125253	-0.0208948	-0.019953	-0.0217626	-0.0213519
Kizilsu Kirgiz Autonomous Prefecture	2007	-0.0207714	-0.0207664	-0.020062	-0.0216453	-0.0216744
Kizilsu Kirgiz Autonomous Prefecture	2008	-0.0213355	-0.0210858	-0.0191694	-0.0216762	-0.0214045
Kizilsu Kirgiz Autonomous Prefecture	2009	-0.0218329	-0.0209761	-0.0221286	-0.0220323	-0.0206097
Kizilsu Kirgiz Autonomous Prefecture	2010	-0.0132329	-0.0217425	-0.0219296	-0.021818	-0.0214216
Kizilsu Kirgiz Autonomous Prefecture	2011	-0.0209254	-0.0215822	-0.0209265	-0.0220213	-0.0178085
Kizilsu Kirgiz Autonomous Prefecture	2012	-0.0209766	-0.02153	-0.0224553	-0.0220415	-0.0183808
Kizilsu Kirgiz Autonomous Prefecture	2013	-0.0211458	-0.0217554	-0.0224831	-0.0221059	-0.0162921
Kizilsu Kirgiz Autonomous Prefecture	2014	-0.0211561	-0.0217957	-0.022798	-0.0222814	-0.01763
Kizilsu Kirgiz Autonomous Prefecture	2015	-0.0219128	-0.0221634	-0.0229078	-0.0223169	-0.0165865
Kizilsu Kirgiz Autonomous Prefecture	2016	-0.0221218	-0.0222701	-0.022884	-0.0223252	-0.0157437
Kizilsu Kirgiz Autonomous Prefecture	2017	-0.0221459	-0.0222926	-0.0228865	-0.0223286	-0.0177461
Kizilsu Kirgiz Autonomous Prefecture	2018	-0.0221613	-0.0223082	-0.0228886	-0.0223273	-0.0162128
Kashgar Administrative Offices	2000	-0.0221914	-0.0222163	-0.0214202	-0.0223213	-0.0220224
Kashgar Administrative Offices	2001	-0.0221589	-0.0220228	-0.0219323	-0.0216375	-0.0219488
Kashgar Administrative Offices	2002	-0.0220259	-0.0220292	-0.0218917	-0.0217281	-0.0219975
Kashgar Administrative Offices	2003	-0.0219165	-0.0219165	-0.0219358	-0.0219634	-0.0219906
Kashgar Administrative Offices	2004	-0.0218718	-0.0218542	-0.0218839	-0.0220722	-0.0219835
Kashgar Administrative Offices	2005	-0.0216742	-0.0216947	-0.0217047	-0.0220799	-0.0219538
Kashgar Administrative Offices	2006	-0.0221851	-0.02153	-0.0217311	-0.0219056	-0.0215597
Kashgar Administrative Offices	2007	-0.0222296	-0.0218408	-0.0216753	-0.0220323	-0.0215439
Kashgar Administrative Offices	2008	-0.0219479	-0.0218536	-0.0220348	-0.0221638	-0.0219769
Kashgar Administrative Offices	2009	-0.0220873	-0.0218286	-0.0221978	-0.0221412	-0.0219146
Kashgar Administrative Offices	2010	-0.0214426	-0.021757	-0.0216389	-0.0219642	-0.0217802
Kashgar Administrative Offices	2011	-0.0216053	-0.0214135	-0.0220457	-0.021925	-0.0217423
Kashgar Administrative Offices	2012	-0.0212998	-0.0215234	-0.0222664	-0.0219811	-0.0217618
Kashgar Administrative Offices	2013	-0.0208518	-0.0215875	-0.0225461	-0.0220662	-0.0209126
Kashgar Administrative Offices	2014	-0.0211405	-0.0219688	-0.0224121	-0.0220257	-0.0210494
Kashgar Administrative Offices	2015	-0.021588	-0.0220859	-0.0225913	-0.0221239	-0.0218802
Kashgar Administrative Offices	2016	-0.021902	-0.0222185	-0.0228018	-0.0222739	-0.021917
Kashgar Administrative Offices	2017	-0.0218747	-0.0222649	-0.0228181	-0.0222928	-0.0219233
Kashgar Administrative Offices	2018	-0.0219251	-0.0222681	-0.0228537	-0.0222868	-0.0218581
Hotan Administrative Offices	2000	-0.0220216	-0.0217726	-0.0222951	-0.0222481	-0.0218806
Hotan Administrative Offices	2001	-0.0218589	-0.0213803	-0.0223511	-0.0222523	-0.0215743
Hotan Administrative Offices	2002	-0.0218037	-0.0216442	-0.0222844	-0.0222088	-0.0216095
Hotan Administrative Offices	2003	-0.0218868	-0.0218421	-0.022451	-0.0221647	-0.0220025
Hotan Administrative Offices	2004	-0.0218486	-0.0219377	-0.022357	-0.0221552	-0.0219697
Hotan Administrative Offices	2005	-0.0218804	-0.0220128	-0.0225688	-0.0222086	-0.0219976
Hotan Administrative Offices	2006	-0.0191958	-0.0216432	-0.0227137	-0.0222415	-0.0220218
Hotan Administrative Offices	2007	-0.0189486	-0.0220339	-0.0226461	-0.022273	-0.0220148
Hotan Administrative Offices	2008	-0.0217256	-0.0221364	-0.0227794	-0.0222629	-0.0220089
Hotan Administrative Offices	2009	-0.0190624	-0.0221393	-0.0227476	-0.0223037	-0.0219804
Hotan Administrative Offices	2010	-0.0213487	-0.0221492	-0.0227855	-0.0222804	-0.0220041
Hotan Administrative Offices	2011	-0.0218802	-0.0220605	-0.0227631	-0.0221829	-0.0219477
Hotan Administrative Offices	2012	-0.0215086	-0.0212572	-0.0227976	-0.0222656	-0.0218879
Hotan Administrative Offices	2013	-0.0212195	-0.0221071	-0.0228432	-0.0222702	-0.0218913
Hotan Administrative Offices	2014	-0.0197649	-0.0221294	-0.0228616	-0.022289	-0.0218739
Hotan Administrative Offices	2015	-0.019927	-0.0209024	-0.0228685	-0.0222904	-0.021881
Hotan Administrative Offices	2016	-0.0207892	-0.0219876	-0.022875	-0.0223171	-0.0218655
Hotan Administrative Offices	2017	-0.0191428	-0.0222723	-0.0228791	-0.0222864	-0.0219354
Hotan Administrative Offices	2018	-0.0199272	-0.0222552	-0.0228974	-0.0222901	-0.0219768
ej		0.999647	0.999068	0.999059	0.998895	0.999085
gj		0.00035275	0.000931829	0.000941201	0.00110495	0.000914557
wj		0.0830921	0.219497	0.221705	0.260277	0.215429
								environmental regulation composite index
Urumqi City	2000	0.0723019	0.176247	0.10797	0.254746	0.205524		0.81679
Urumqi City	2001	0.0682087	0.162804	0.0930784	0.247555	0.201835		0.773481
Urumqi City	2002	0.0686182	0.166019	0.109188	0.248868	0.202382		0.795075
Urumqi City	2003	0.0703153	0.171843	0.134769	0.251711	0.201994		0.830633
Urumqi City	2004	0.0707878	0.172115	0.140424	0.252755	0.20316		0.839243
Urumqi City	2005	0.0704744	0.173362	0.153425	0.252386	0.203526		0.853174
Urumqi City	2006	0.0701996	0.168234	0.155871	0.249246	0.206707		0.850257
Urumqi City	2007	0.0683037	0.172933	0.160365	0.24549	0.202467		0.849559
Urumqi City	2008	0.0688108	0.179038	0.158607	0.249084	0.20318		0.85872
Urumqi City	2009	0.07324	0.189578	0.165001	0.249917	0.204408		0.882144
Urumqi City	2010	0.0704643	0.196727	0.173152	0.252701	0.203061		0.896104
Urumqi City	2011	0.0665528	0.192099	0.186938	0.252991	0.199813		0.898394
Urumqi City	2012	0.0675193	0.198626	0.186355	0.255084	0.198081		0.905664
Urumqi City	2013	0.0701908	0.208969	0.195646	0.256345	0.20246		0.93361
Urumqi City	2014	0.0695505	0.210605	0.198353	0.257085	0.205513		0.941106
Urumqi City	2015	0.0738642	0.213305	0.206472	0.257314	0.208284		0.95924
Urumqi City	2016	0.0759851	0.216005	0.203596	0.258239	0.208926		0.962751
Urumqi City	2017	0.0739965	0.217005	0.209356	0.258778	0.208036		0.967171
Urumqi City	2018	0.0754529	0.219497	0.212382	0.259088	0.208288		0.974709
Karamay City	2000	0.0713709	0.207896	0.0841523	0.201294	0.213191		0.777904
Karamay City	2001	0.0706542	0.205146	0.0847718	0.219813	0.213694		0.794078
Karamay City	2002	0.0719678	0.205766	0.0982076	0.243843	0.213653		0.833438
Karamay City	2003	0.0697292	0.204371	0.113651	0.247885	0.213455		0.849092
Karamay City	2004	0.068638	0.190312	0.143287	0.249371	0.213167		0.864776
Karamay City	2005	0.0675259	0.190839	0.153698	0.251157	0.213043		0.876263
Karamay City	2006	0.069525	0.193508	0.178858	0.25348	0.212535		0.907905
Karamay City	2007	0.0713667	0.197747	0.171018	0.252513	0.213297		0.905943
Karamay City	2008	0.0719012	0.19979	0.176089	0.255315	0.213329		0.916424
Karamay City	2009	0.0693607	0.181209	0.17957	0.255585	0.213282		0.899007
Karamay City	2010	0.0661991	0.185344	0.179591	0.254977	0.209796		0.895907
Karamay City	2011	0.0667277	0.183689	0.18002	0.254916	0.212795		0.898147
Karamay City	2012	0.065713	0.186115	0.180779	0.254221	0.210895		0.897722
Karamay City	2013	0.0648784	0.19039	0.115638	0.254706	0.212021		0.837635
Karamay City	2014	0.0645767	0.199051	0.181802	0.256026	0.210932		0.912389
Karamay City	2015	0.0663513	0.206426	0.190807	0.256383	0.210951		0.930919
Karamay City	2016	0.0677979	0.213331	0.189605	0.256758	0.209971		0.937463
Karamay City	2017	0.0690117	0.215889	0.194942	0.258123	0.209706		0.947672
Karamay City	2018	0.0699853	0.216474	0.195203	0.257772	0.210088		0.949523
Turpan City	2000	0.0811766	0.208336	0.213302	0.256222	0.21215		0.971188
Turpan City	2001	0.0756691	0.203947	0.212214	0.252008	0.196432		0.94027
Turpan City	2002	0.0760746	0.204977	0.214383	0.254848	0.202936		0.95322
Turpan City	2003	0.0777108	0.202892	0.215097	0.257025	0.204823		0.957548
Turpan City	2004	0.0705032	0.166273	0.215197	0.258449	0.206465		0.916887
Turpan City	2005	0.0699925	0.172969	0.216626	0.258882	0.20668		0.92515
Turpan City	2006	0.0795651	0.189042	0.215797	0.259035	0.206309		0.949748
Turpan City	2007	0.0700651	0.148104	0.220953	0.25952	0.200498		0.89914
Turpan City	2008	0.0741718	0.1588	0.221503	0.258576	0.199481		0.912532
Turpan City	2009	0.0749669	0.180453	0.212136	0.259221	0.190359		0.917136
Turpan City	2010	0.0728405	0.18801	0.220734	0.258747	0.198455		0.938786
Turpan City	2011	0.0714636	0.190598	0.220229	0.259455	0.185919		0.927665
Turpan City	2012	0.067655	0.193133	0.220196	0.258924	0.176527		0.916435
Turpan City	2013	0.0581128	0.166956	0.215969	0.256223	0.184731		0.881992
Turpan City	2014	0.0668115	0.196583	0.218087	0.251225	0.185916		0.918623
Turpan City	2015	0.0690148	0.169922	0.220673	0.257335	0.196724		0.913669
Turpan City	2016	0.0681284	0.204892	0.220404	0.260005	0.195397		0.948826
Turpan City	2017	0.0555417	0.207212	0.221705	0.260277	0.191097		0.935832
Turpan City	2018	0.0613163	0.212664	0.22119	0.260073	0.190976		0.94622
Hami City	2000	0.0734584	0.156246	0.1581	0.252761	0.201154		0.841719
Hami City	2001	0.0716564	0.154721	0.126579	0.248914	0.199585		0.801456
Hami City	2002	0.069167	0.15035	0.100262	0.210658	0.199115		0.729552
Hami City	2003	0.0681819	0.111732	0.092708	0.224739	0.187547		0.684908
Hami City	2004	0.0547647	0.0112179	0.0453595	0.240737	0.161687		0.513766
Hami City	2005	0.0528894	0.0196702	0.0597991	0.242378	0.141129		0.515866
Hami City	2006	0.0638216	0.0857504	0.100665	0.254068	0.142617		0.646922
Hami City	2007	0.0601223	0.0810502	0	0.236593	0.118384		0.49615
Hami City	2008	0.0654186	0.0290755	0.12644	0.243415	0.0760665		0.540416
Hami City	2009	0.0647261	0.0843113	0.141576	0.251016	0.092095		0.633724
Hami City	2010	0.0654652	0.117282	0.145635	0.252321	0.111871		0.692575
Hami City	2011	0.0704669	0.134499	0.20213	0.258685	0.141946		0.807727
Hami City	2012	0.0611546	0.145478	0.192467	0.256481	0.0686967		0.724277
Hami City	2013	0.0647611	0.169085	0.192916	0.257283	0.0608523		0.744898
Hami City	2014	0.0645949	0.167288	0.191426	0.250164	0.129481		0.802954
Hami City	2015	0.0533562	0.164817	0.20952	0.254595	0.115057		0.797346
Hami City	2016	0.0544389	0.178946	0.216057	0.259506	0.119624		0.828571
Hami City	2017	0.0399964	0.19192	0.21834	0.259713	0.130163		0.840132
Hami City	2018	0.048043	0.204146	0.217668	0.25952	0.120722		0.850099
Changji Hui Autonomous Prefecture	2000	0.0700247	0.160516	0.126389	0.124953	0.210568		0.692451
Changji Hui Autonomous Prefecture	2001	0.0724628	0.161737	0.124297	0.218689	0.205769		0.782955
Changji Hui Autonomous Prefecture	2002	0.0714035	0.168268	0.147545	0.220853	0.190664		0.798733
Changji Hui Autonomous Prefecture	2003	0.0681797	0.161456	0.151658	0.144092	0.193605		0.718991
Changji Hui Autonomous Prefecture	2004	0.0718004	0.163741	0.142787	0.19484	0.204575		0.777743
Changji Hui Autonomous Prefecture	2005	0.0707731	0.159603	0.131618	0.179927	0.206576		0.748497
Changji Hui Autonomous Prefecture	2006	0.0718594	0.181045	0.145712	0.201141	0.207616		0.807373
Changji Hui Autonomous Prefecture	2007	0.071088	0.17716	0.16426	0.22285	0.208166		0.843524
Changji Hui Autonomous Prefecture	2008	0.0698689	0.177748	0.15615	0.216669	0.207086		0.827522
Changji Hui Autonomous Prefecture	2009	0.0727366	0.172795	0.16016	0.218041	0.208734		0.832467
Changji Hui Autonomous Prefecture	2010	0.0691523	0.181288	0.166534	0.217961	0.20404		0.838974
Changji Hui Autonomous Prefecture	2011	0.0719194	0.176755	0.175871	0.231695	0.206933		0.863174
Changji Hui Autonomous Prefecture	2012	0.0686014	0.194581	0.180099	0.222774	0.174786		0.840841
Changji Hui Autonomous Prefecture	2013	0.0583914	0.186982	0.185502	0.226656	0.176125		0.833656
Changji Hui Autonomous Prefecture	2014	0.0621084	0.18064	0.199605	0.232654	0.195984		0.870991
Changji Hui Autonomous Prefecture	2015	0.0618974	0.191401	0.20688	0.234671	0.192896		0.887746
Changji Hui Autonomous Prefecture	2016	0.0554232	0.210025	0.203911	0.253925	0.197139		0.920423
Changji Hui Autonomous Prefecture	2017	0.055823	0.212069	0.207265	0.256274	0.197401		0.928832
Changji Hui Autonomous Prefecture	2018	0.0542007	0.211906	0.210204	0.255553	0.196131		0.927995
prefectures and cities directly under Ili Kazak Autonomous Prefecture	2000	0.0830921	0.215372	0.191633	0.0879764	0.214597		0.79267
prefectures and cities directly under Ili Kazak Autonomous Prefecture	2001	0.0794848	0.198704	0.191331	0.171256	0.195524		0.836301
Counties (Cities) Direct Under Ili Prefecture	2002	0.0745193	0.1812	0.179354	0.159897	0.200248		0.795218
Counties (Cities) Direct Under Ili Prefecture	2003	0.0747274	0.182238	0.171784	0.152677	0.206009		0.787436
Counties (Cities) Direct Under Ili Prefecture	2004	0.0736723	0.1859	0.165427	0.155167	0.207845		0.788012
Counties (Cities) Direct Under Ili Prefecture	2005	0.0739722	0.182096	0.16385	0.159646	0.207127		0.786691
Counties (Cities) Direct Under Ili Prefecture	2006	0.0705476	0.170094	0.170901	0.180083	0.206686		0.798312
Counties (Cities) Direct Under Ili Prefecture	2007	0.0703922	0.186687	0.152778	0.126141	0.204634		0.740631
Counties (Cities) Direct Under Ili Prefecture	2008	0.0700995	0.186924	0.147414	0.164611	0.205582		0.77463
Counties (Cities) Direct Under Ili Prefecture	2009	0.0676173	0.187672	0.156028	0.191805	0.205604		0.808727
Counties (Cities) Direct Under Ili Prefecture	2010	0.0671149	0.193241	0.159955	0.191579	0.203499		0.815389
Counties (Cities) Direct Under Ili Prefecture	2011	0.0748014	0.19782	0.187166	0.220406	0.197674		0.877867
Counties (Cities) Direct Under Ili Prefecture	2012	0.0716661	0.19753	0.187012	0.247479	0.195571		0.899258
Counties (Cities) Direct Under Ili Prefecture	2013	0.0650996	0.192394	0.192245	0.24813	0.181197		0.879065
Counties (Cities) Direct Under Ili Prefecture	2014	0.0567477	0.197376	0.19438	0.242167	0.195606		0.886276
Counties (Cities) Direct Under Ili Prefecture	2015	0.0707764	0.203266	0.200991	0.245708	0.204796		0.925536
Counties (Cities) Direct Under Ili Prefecture	2016	0.070605	0.21322	0.204946	0.259088	0.19592		0.943779
Counties (Cities) Direct Under Ili Prefecture	2017	0.073901	0.21683	0.205068	0.257753	0.175829		0.92938
Counties (Cities) Direct Under Ili Prefecture	2018	0.0679066	0.217328	0.207529	0.25886	0.187342		0.938966
Tarbagatai Administrative Offices	2000	0.0810303	0.205975	0.207531	0.235742	0.213482		0.94376
Tarbagatai Administrative Offices	2001	0.0812347	0.215275	0.202708	0.224266	0.213574		0.937057
Tarbagatai Administrative Offices	2002	0.0801494	0.213426	0.200597	0.217447	0.212502		0.924121
Tarbagatai Administrative Offices	2003	0.0774587	0.21068	0.197098	0.228578	0.212768		0.926583
Tarbagatai Administrative Offices	2004	0.0773072	0.209629	0.181184	0.228169	0.213537		0.909827
Tarbagatai Administrative Offices	2005	0.0769558	0.207357	0.171273	0.212803	0.213725		0.882114
Tarbagatai Administrative Offices	2006	0.0794912	0.198549	0.187611	0.187444	0.213016		0.866112
Tarbagatai Administrative Offices	2007	0.0794113	0.19995	0.175707	0.179259	0.211926		0.846254
Tarbagatai Administrative Offices	2008	0.079239	0.200844	0.172553	0.178765	0.209882		0.841283
Tarbagatai Administrative Offices	2009	0.0759972	0.202928	0.183758	0.16738	0.211467		0.84153
Tarbagatai Administrative Offices	2010	0.0816344	0.207701	0.175403	0.159991	0.210323		0.835053
Tarbagatai Administrative Offices	2011	0.0786397	0.202332	0.177787	0.190222	0.207291		0.856271
Tarbagatai Administrative Offices	2012	0.0771277	0.208543	0.195136	0.235989	0.206491		0.923287
Tarbagatai Administrative Offices	2013	0.0755435	0.209807	0.203065	0.23947	0.205933		0.933818
Tarbagatai Administrative Offices	2014	0.0751253	0.210285	0.201676	0.238501	0.208512		0.9341
Tarbagatai Administrative Offices	2015	0.0763486	0.215951	0.199994	0.251834	0.210054		0.954182
Tarbagatai Administrative Offices	2016	0.0784265	0.21802	0.199594	0.25721	0.21025		0.9635
Tarbagatai Administrative Offices	2017	0.0803064	0.219013	0.206978	0.25853	0.209819		0.974647
Tarbagatai Administrative Offices	2018	0.079611	0.219314	0.204916	0.258089	0.209225		0.971155
Altay Administrative Offices	2000	0.0748777	0.121757	0.0898788	0.113772	0.189761		0.590046
Altay Administrative Offices	2001	0.0775809	0.159804	0.101354	0.136358	0.191348		0.666444
Altay Administrative Offices	2002	0.0795545	0.166636	0.112525	0.1209	0.199025		0.67864
Altay Administrative Offices	2003	0.0792151	0.169905	0.124379	0.112002	0.189392		0.674893
Altay Administrative Offices	2004	0.0699044	0.168568	0.123367	0.0982224	0.183725		0.643786
Altay Administrative Offices	2005	0.076097	0.156466	0.134734	0.13302	0.176265		0.676581
Altay Administrative Offices	2006	0.07701	0.0848117	0.158637	0.077792	0.166881		0.565132
Altay Administrative Offices	2007	0.076342	0.0565923	0.136092	0.201397	0.148433		0.618857
Altay Administrative Offices	2008	0.0717478	0.087437	0.186052	0.204158	0.163609		0.713004
Altay Administrative Offices	2009	0.0708485	0.0872631	0.196613	0.253107	0.0941979		0.70203
Altay Administrative Offices	2010	0.074378	0.0890469	0.196947	0.245832	0.0518438		0.658048
Altay Administrative Offices	2011	0.0729225	0.0245178	0.166565	0.240321	0		0.504326
Altay Administrative Offices	2012	0.0727875	0	0.197286	0.243938	0.0346165		0.548629
Altay Administrative Offices	2013	0.0720005	0.0118584	0.191289	0.25423	0.0388404		0.568219
Altay Administrative Offices	2014	0.0747074	0.0668806	0.189989	0.253648	0.0529159		0.638141
Altay Administrative Offices	2015	0.0770625	0.0433271	0.196441	0.254628	0.0736198		0.645078
Altay Administrative Offices	2016	0.0771766	0.199921	0.19837	0.254271	0.0936032		0.823341
Altay Administrative Offices	2017	0.077928	0.198044	0.0930388	0.252311	0.0923921		0.713714
Altay Administrative Offices	2018	0.0780579	0.197456	0.154454	0.252623	0.0883293		0.770921
Bortala Mongolian Autonomous Prefecture	2000	0.0793762	0.189148	0.173405	0.123846	0.202905		0.76868
Bortala Mongolian Autonomous Prefecture	2001	0.0809124	0.202107	0.167142	0.178503	0.200521		0.829186
Bortala Mongolian Autonomous Prefecture	2002	0.0746813	0.193117	0.127096	0.182982	0.194659		0.772535
Bortala Mongolian Autonomous Prefecture	2003	0.075128	0.192845	0.12317	0.17348	0.201442		0.766065
Bortala Mongolian Autonomous Prefecture	2004	0.0707001	0.188896	0.133691	0.17003	0.201944		0.765261
Bortala Mongolian Autonomous Prefecture	2005	0.0737986	0.191627	0.14795	0.180573	0.212851		0.806801
Bortala Mongolian Autonomous Prefecture	2006	0.0753197	0.191679	0.165576	0.202337	0.212287		0.847198
Bortala Mongolian Autonomous Prefecture	2007	0.0766842	0.193149	0.174005	0.120975	0.206783		0.771597
Bortala Mongolian Autonomous Prefecture	2008	0.0765239	0.199804	0.177364	0.121396	0.208671		0.783758
Bortala Mongolian Autonomous Prefecture	2009	0.0754071	0.193833	0.171156	0.123026	0.211203		0.774624
Bortala Mongolian Autonomous Prefecture	2010	0.0692899	0.197012	0.15175	0	0.212068		0.63012
Bortala Mongolian Autonomous Prefecture	2011	0.0681908	0.201707	0.143514	0.0349339	0.21148		0.659826
Bortala Mongolian Autonomous Prefecture	2012	0.0757104	0.199483	0.155423	0.0868485	0.20968		0.727145
Bortala Mongolian Autonomous Prefecture	2013	0.0755236	0.200701	0.193906	0.183504	0.211765		0.8654
Bortala Mongolian Autonomous Prefecture	2014	0.076879	0.200885	0.187194	0.195792	0.211641		0.872391
Bortala Mongolian Autonomous Prefecture	2015	0.0773642	0.212126	0.190709	0.207258	0.213517		0.900974
Bortala Mongolian Autonomous Prefecture	2016	0.0774063	0.213163	0.20592	0.258167	0.213565		0.968222
Bortala Mongolian Autonomous Prefecture	2017	0.0767332	0.216014	0.211568	0.258631	0.213065		0.976011
Bortala Mongolian Autonomous Prefecture	2018	0.0779341	0.216709	0.213546	0.25889	0.213047		0.980126
Bayangol Mongolian Autonomous Prefecture	2000	0.0795602	0.201923	0.0701585	0.0639257	0.201297		0.616864
Bayangol Mongolian Autonomous Prefecture	2001	0.07928	0.205559	0.134436	0.166984	0.213568		0.799827
Bayangol Mongolian Autonomous Prefecture	2002	0.0807919	0.204696	0.133726	0.179088	0.197236		0.795537
Bayangol Mongolian Autonomous Prefecture	2003	0.0798736	0.202559	0.137324	0.164331	0.198914		0.783002
Bayangol Mongolian Autonomous Prefecture	2004	0.0730708	0.191949	0.0993243	0.107651	0.200721		0.672716
Bayangol Mongolian Autonomous Prefecture	2005	0.0752412	0.193686	0.113112	0.0498031	0.203199		0.635041
Bayangol Mongolian Autonomous Prefecture	2006	0.0769817	0.204618	0.123256	0.0883	0.202061		0.695217
Bayangol Mongolian Autonomous Prefecture	2007	0.0781316	0.200615	0.138831	0.0804607	0.205519		0.703558
Bayangol Mongolian Autonomous Prefecture	2008	0.0797365	0.201516	0.12392	0.114318	0.205276		0.724767
Bayangol Mongolian Autonomous Prefecture	2009	0.0779213	0.204457	0.111992	0.122201	0.203061		0.719632
Bayangol Mongolian Autonomous Prefecture	2010	0.0731038	0.19715	0.0990064	0.0942814	0.197197		0.660739
Bayangol Mongolian Autonomous Prefecture	2011	0.0716247	0.195381	0.122307	0.11781	0.199898		0.707021
Bayangol Mongolian Autonomous Prefecture	2012	0.0498007	0.19299	0.097729	0.103492	0.199039		0.643051
Bayangol Mongolian Autonomous Prefecture	2013	0.0676713	0.193185	0.105686	0.103761	0.203105		0.673408
Bayangol Mongolian Autonomous Prefecture	2014	0.0734033	0.201475	0.110282	0.126261	0.203258		0.714678
Bayangol Mongolian Autonomous Prefecture	2015	0.077477	0.210058	0.145955	0.120845	0.211256		0.76559
Bayangol Mongolian Autonomous Prefecture	2016	0.0772437	0.215644	0.182664	0.256208	0.178762		0.910522
Bayangol Mongolian Autonomous Prefecture	2017	0.0750815	0.217056	0.186417	0.257344	0.188819		0.924718
Bayangol Mongolian Autonomous Prefecture	2018	0.0726136	0.21713	0.187221	0.256863	0.193279		0.927107
Aksu Administrative Offices	2000	0.0798342	0.205918	0.21117	0.247997	0.213594		0.958515
Aksu Administrative Offices	2001	0.0817313	0.212741	0.208109	0.222725	0.213376		0.938682
Aksu Administrative Offices	2002	0.0754217	0.209988	0.203053	0.215326	0.210156		0.913944
Aksu Administrative Offices	2003	0.0762256	0.210542	0.200903	0.215388	0.209557		0.912616
Aksu Administrative Offices	2004	0.0736477	0.18737	0.192364	0.225334	0.209062		0.887778
Aksu Administrative Offices	2005	0.0746015	0.202141	0.185804	0.218028	0.2094		0.889975
Aksu Administrative Offices	2006	0.0651576	0.186388	0.191914	0.19699	0.204756		0.845205
Aksu Administrative Offices	2007	0.071383	0.190791	0.178695	0.235583	0.20812		0.884571
Aksu Administrative Offices	2008	0.071731	0.195471	0.174089	0.222421	0.209709		0.873421
Aksu Administrative Offices	2009	0.0695069	0.196973	0.157939	0.21771	0.203693		0.845822
Aksu Administrative Offices	2010	0.0685503	0.20219	0.169587	0.229183	0.206432		0.875942
Aksu Administrative Offices	2011	0.0721911	0.204995	0.171836	0.215971	0.207927		0.87292
Aksu Administrative Offices	2012	0.0649888	0.203409	0.176313	0.214459	0.204325		0.863495
Aksu Administrative Offices	2013	0.064518	0.207441	0.188778	0.218873	0.207394		0.887004
Aksu Administrative Offices	2014	0.0691095	0.209246	0.195212	0.223537	0.205805		0.902911
Aksu Administrative Offices	2015	0.0757967	0.216133	0.2005	0.233063	0.208903		0.934396
Aksu Administrative Offices	2016	0.0790376	0.218973	0.207864	0.258847	0.211093		0.975815
Aksu Administrative Offices	2017	0.0776371	0.218604	0.207279	0.258888	0.21107		0.973478
Aksu Administrative Offices	2018	0.0773689	0.218982	0.208994	0.259013	0.210598		0.974955
Kizilsu Kirgiz Autonomous Prefecture	2000	0.0760618	0.189769	0.0464438	0.231663	0.208762		0.752699
Kizilsu Kirgiz Autonomous Prefecture	2001	0.0716618	0.204656	0.164947	0.185215	0.210325		0.836806
Kizilsu Kirgiz Autonomous Prefecture	2002	0.0766665	0.204429	0.204225	0.256825	0.211886		0.954031
Kizilsu Kirgiz Autonomous Prefecture	2003	0.076311	0.208751	0.208652	0.25772	0.213351		0.964785
Kizilsu Kirgiz Autonomous Prefecture	2004	0.0730476	0.213056	0.204754	0.250468	0.214314		0.95564
Kizilsu Kirgiz Autonomous Prefecture	2005	0.070434	0.210874	0.197223	0.250378	0.212894		0.941804
Kizilsu Kirgiz Autonomous Prefecture	2006	0	0.185093	0.152991	0.244208	0.199479		0.781771
Kizilsu Kirgiz Autonomous Prefecture	2007	0.0697033	0.182067	0.155479	0.240893	0.207135		0.855276
Kizilsu Kirgiz Autonomous Prefecture	2008	0.0747736	0.189602	0.135199	0.241765	0.200724		0.842065
Kizilsu Kirgiz Autonomous Prefecture	2009	0.0792745	0.187012	0.203339	0.251849	0.181978		0.903453
Kizilsu Kirgiz Autonomous Prefecture	2010	0.00563217	0.205191	0.198675	0.245775	0.20113		0.856403
Kizilsu Kirgiz Autonomous Prefecture	2011	0.0710839	0.201374	0.175347	0.251537	0.117441		0.816783
Kizilsu Kirgiz Autonomous Prefecture	2012	0.0715434	0.200132	0.211017	0.252112	0.130428		0.865232
Kizilsu Kirgiz Autonomous Prefecture	2013	0.0730648	0.205498	0.211673	0.253939	0.0835454		0.82772
Kizilsu Kirgiz Autonomous Prefecture	2014	0.0731575	0.20646	0.219104	0.258929	0.113411		0.871063
Kizilsu Kirgiz Autonomous Prefecture	2015	0.0800004	0.21525	0.221703	0.25994	0.090066		0.866959
Kizilsu Kirgiz Autonomous Prefecture	2016	0.081901	0.217807	0.22114	0.260177	0.0714735		0.8525
Kizilsu Kirgiz Autonomous Prefecture	2017	0.082121	0.218348	0.221199	0.260273	0.116031		0.897972
Kizilsu Kirgiz Autonomous Prefecture	2018	0.0822608	0.218722	0.221249	0.260236	0.0817937		0.864261
Kashgar Administrative Offices	2000	0.0825355	0.216517	0.186792	0.260066	0.215429		0.961339
Kashgar Administrative Offices	2001	0.0822393	0.211882	0.19874	0.240673	0.213673		0.947207
Kashgar Administrative Offices	2002	0.0810287	0.212035	0.197789	0.243231	0.214834		0.948918
Kashgar Administrative Offices	2003	0.0800335	0.209342	0.19882	0.249895	0.214669		0.952761
Kashgar Administrative Offices	2004	0.0796272	0.207854	0.197606	0.252983	0.214502		0.952572
Kashgar Administrative Offices	2005	0.0778351	0.204051	0.193419	0.253202	0.213791		0.942299
Kashgar Administrative Offices	2006	0.0824781	0.200133	0.194037	0.248257	0.204407		0.929311
Kashgar Administrative Offices	2007	0.0828838	0.207534	0.192733	0.25185	0.204033		0.939034
Kashgar Administrative Offices	2008	0.0803187	0.207841	0.201139	0.255584	0.214344		0.959227
Kashgar Administrative Offices	2009	0.081587	0.207243	0.204962	0.254943	0.212855		0.961591
Kashgar Administrative Offices	2010	0.0757403	0.205537	0.191886	0.249916	0.209653		0.932732
Kashgar Administrative Offices	2011	0.0772115	0.197366	0.201395	0.248807	0.208751		0.933531
Kashgar Administrative Offices	2012	0.0744518	0.199976	0.206573	0.250397	0.209213		0.940611
Kashgar Administrative Offices	2013	0.0704235	0.201501	0.213158	0.252812	0.1891		0.926995
Kashgar Administrative Offices	2014	0.0730166	0.210592	0.21	0.251661	0.192325		0.937594
Kashgar Administrative Offices	2015	0.077055	0.213394	0.214223	0.254451	0.212037		0.971159
Kashgar Administrative Offices	2016	0.0799017	0.21657	0.219196	0.258718	0.212915		0.9873
Kashgar Administrative Offices	2017	0.0796542	0.217683	0.21958	0.259254	0.213063		0.989233
Kashgar Administrative Offices	2018	0.0801121	0.217758	0.220423	0.259084	0.21151		0.988888
Hotan Administrative Offices	2000	0.080989	0.205908	0.207249	0.257983	0.212044		0.964173
Hotan Administrative Offices	2001	0.0795106	0.196576	0.208566	0.258103	0.204755		0.94751
Hotan Administrative Offices	2002	0.0790098	0.202849	0.206997	0.256864	0.205591		0.951312
Hotan Administrative Offices	2003	0.0797638	0.207567	0.210917	0.255611	0.214953		0.968813
Hotan Administrative Offices	2004	0.0794168	0.209848	0.208704	0.255339	0.21417		0.967479
Hotan Administrative Offices	2005	0.0797057	0.211643	0.213692	0.25686	0.214837		0.976737
Hotan Administrative Offices	2006	0.0557344	0.202824	0.217114	0.257794	0.215414		0.948881
Hotan Administrative Offices	2007	0.0535698	0.212149	0.215515	0.258692	0.215248		0.955174
Hotan Administrative Offices	2008	0.0783015	0.214602	0.218666	0.258404	0.215108		0.985081
Hotan Administrative Offices	2009	0.0545658	0.214672	0.217915	0.259564	0.214427		0.961143
Hotan Administrative Offices	2010	0.0748929	0.214908	0.218809	0.258902	0.214993		0.982505
Hotan Administrative Offices	2011	0.0797038	0.212785	0.21828	0.256128	0.213646		0.980543
Hotan Administrative Offices	2012	0.0763373	0.193659	0.219095	0.25848	0.212219		0.959791
Hotan Administrative Offices	2013	0.073728	0.213901	0.220174	0.25861	0.212299		0.978713
Hotan Administrative Offices	2014	0.0607469	0.214434	0.220611	0.259146	0.211885		0.966822
Hotan Administrative Offices	2015	0.0621809	0.185273	0.220774	0.259186	0.212055		0.939468
Hotan Administrative Offices	2016	0.0698627	0.211041	0.220926	0.259947	0.211685		0.973462
Hotan Administrative Offices	2017	0.0552702	0.217859	0.221023	0.259072	0.213353		0.966577
Hotan Administrative Offices	2018	0.0621833	0.217448	0.221456	0.259177	0.21434		0.974605

## Sheet: 结果
id	year	environmental regulation composite index
Urumqi City	2000	0.81679
Urumqi City	2001	0.773481
Urumqi City	2002	0.795075
Urumqi City	2003	0.830633
Urumqi City	2004	0.839243
Urumqi City	2005	0.853174
Urumqi City	2006	0.850257
Urumqi City	2007	0.849559
Urumqi City	2008	0.85872
Urumqi City	2009	0.882144
Urumqi City	2010	0.896104
Urumqi City	2011	0.898394
Urumqi City	2012	0.905664
Urumqi City	2013	0.93361
Urumqi City	2014	0.941106
Urumqi City	2015	0.95924
Urumqi City	2016	0.962751
Urumqi City	2017	0.967171
Urumqi City	2018	0.974709
Karamay City	2000	0.777904
Karamay City	2001	0.794078
Karamay City	2002	0.833438
Karamay City	2003	0.849092
Karamay City	2004	0.864776
Karamay City	2005	0.876263
Karamay City	2006	0.907905
Karamay City	2007	0.905943
Karamay City	2008	0.916424
Karamay City	2009	0.899007
Karamay City	2010	0.895907
Karamay City	2011	0.898147
Karamay City	2012	0.897722
Karamay City	2013	0.837635
Karamay City	2014	0.912389
Karamay City	2015	0.930919
Karamay City	2016	0.937463
Karamay City	2017	0.947672
Karamay City	2018	0.949523
Turpan City	2000	0.971188
Turpan City	2001	0.94027
Turpan City	2002	0.95322
Turpan City	2003	0.957548
Turpan City	2004	0.916887
Turpan City	2005	0.92515
Turpan City	2006	0.949748
Turpan City	2007	0.89914
Turpan City	2008	0.912532
Turpan City	2009	0.917136
Turpan City	2010	0.938786
Turpan City	2011	0.927665
Turpan City	2012	0.916435
Turpan City	2013	0.881992
Turpan City	2014	0.918623
Turpan City	2015	0.913669
Turpan City	2016	0.948826
Turpan City	2017	0.935832
Turpan City	2018	0.94622
Hami City	2000	0.841719
Hami City	2001	0.801456
Hami City	2002	0.729552
Hami City	2003	0.684908
Hami City	2004	0.513766
Hami City	2005	0.515866
Hami City	2006	0.646922
Hami City	2007	0.49615
Hami City	2008	0.540416
Hami City	2009	0.633724
Hami City	2010	0.692575
Hami City	2011	0.807727
Hami City	2012	0.724277
Hami City	2013	0.744898
Hami City	2014	0.802954
Hami City	2015	0.797346
Hami City	2016	0.828571
Hami City	2017	0.840132
Hami City	2018	0.850099
Changji Hui Autonomous Prefecture	2000	0.692451
Changji Hui Autonomous Prefecture	2001	0.782955
Changji Hui Autonomous Prefecture	2002	0.798733
Changji Hui Autonomous Prefecture	2003	0.718991
Changji Hui Autonomous Prefecture	2004	0.777743
Changji Hui Autonomous Prefecture	2005	0.748497
Changji Hui Autonomous Prefecture	2006	0.807373
Changji Hui Autonomous Prefecture	2007	0.843524
Changji Hui Autonomous Prefecture	2008	0.827522
Changji Hui Autonomous Prefecture	2009	0.832467
Changji Hui Autonomous Prefecture	2010	0.838974
Changji Hui Autonomous Prefecture	2011	0.863174
Changji Hui Autonomous Prefecture	2012	0.840841
Changji Hui Autonomous Prefecture	2013	0.833656
Changji Hui Autonomous Prefecture	2014	0.870991
Changji Hui Autonomous Prefecture	2015	0.887746
Changji Hui Autonomous Prefecture	2016	0.920423
Changji Hui Autonomous Prefecture	2017	0.928832
Changji Hui Autonomous Prefecture	2018	0.927995
prefectures and cities directly under Ili Kazak Autonomous Prefecture	2000	0.79267
prefectures and cities directly under Ili Kazak Autonomous Prefecture	2001	0.836301
Counties (Cities) Direct Under Ili Prefecture	2002	0.795218
Counties (Cities) Direct Under Ili Prefecture	2003	0.787436
Counties (Cities) Direct Under Ili Prefecture	2004	0.788012
Counties (Cities) Direct Under Ili Prefecture	2005	0.786691
Counties (Cities) Direct Under Ili Prefecture	2006	0.798312
Counties (Cities) Direct Under Ili Prefecture	2007	0.740631
Counties (Cities) Direct Under Ili Prefecture	2008	0.77463
Counties (Cities) Direct Under Ili Prefecture	2009	0.808727
Counties (Cities) Direct Under Ili Prefecture	2010	0.815389
Counties (Cities) Direct Under Ili Prefecture	2011	0.877867
Counties (Cities) Direct Under Ili Prefecture	2012	0.899258
Counties (Cities) Direct Under Ili Prefecture	2013	0.879065
Counties (Cities) Direct Under Ili Prefecture	2014	0.886276
Counties (Cities) Direct Under Ili Prefecture	2015	0.925536
Counties (Cities) Direct Under Ili Prefecture	2016	0.943779
Counties (Cities) Direct Under Ili Prefecture	2017	0.92938
Counties (Cities) Direct Under Ili Prefecture	2018	0.938966
Tarbagatai Administrative Offices	2000	0.94376
Tarbagatai Administrative Offices	2001	0.937057
Tarbagatai Administrative Offices	2002	0.924121
Tarbagatai Administrative Offices	2003	0.926583
Tarbagatai Administrative Offices	2004	0.909827
Tarbagatai Administrative Offices	2005	0.882114
Tarbagatai Administrative Offices	2006	0.866112
Tarbagatai Administrative Offices	2007	0.846254
Tarbagatai Administrative Offices	2008	0.841283
Tarbagatai Administrative Offices	2009	0.84153
Tarbagatai Administrative Offices	2010	0.835053
Tarbagatai Administrative Offices	2011	0.856271
Tarbagatai Administrative Offices	2012	0.923287
Tarbagatai Administrative Offices	2013	0.933818
Tarbagatai Administrative Offices	2014	0.9341
Tarbagatai Administrative Offices	2015	0.954182
Tarbagatai Administrative Offices	2016	0.9635
Tarbagatai Administrative Offices	2017	0.974647
Tarbagatai Administrative Offices	2018	0.971155
Altay Administrative Offices	2000	0.590046
Altay Administrative Offices	2001	0.666444
Altay Administrative Offices	2002	0.67864
Altay Administrative Offices	2003	0.674893
Altay Administrative Offices	2004	0.643786
Altay Administrative Offices	2005	0.676581
Altay Administrative Offices	2006	0.565132
Altay Administrative Offices	2007	0.618857
Altay Administrative Offices	2008	0.713004
Altay Administrative Offices	2009	0.70203
Altay Administrative Offices	2010	0.658048
Altay Administrative Offices	2011	0.504326
Altay Administrative Offices	2012	0.548629
Altay Administrative Offices	2013	0.568219
Altay Administrative Offices	2014	0.638141
Altay Administrative Offices	2015	0.645078
Altay Administrative Offices	2016	0.823341
Altay Administrative Offices	2017	0.713714
Altay Administrative Offices	2018	0.770921
Bortala Mongolian Autonomous Prefecture	2000	0.76868
Bortala Mongolian Autonomous Prefecture	2001	0.829186
Bortala Mongolian Autonomous Prefecture	2002	0.772535
Bortala Mongolian Autonomous Prefecture	2003	0.766065
Bortala Mongolian Autonomous Prefecture	2004	0.765261
Bortala Mongolian Autonomous Prefecture	2005	0.806801
Bortala Mongolian Autonomous Prefecture	2006	0.847198
Bortala Mongolian Autonomous Prefecture	2007	0.771597
Bortala Mongolian Autonomous Prefecture	2008	0.783758
Bortala Mongolian Autonomous Prefecture	2009	0.774624
Bortala Mongolian Autonomous Prefecture	2010	0.63012
Bortala Mongolian Autonomous Prefecture	2011	0.659826
Bortala Mongolian Autonomous Prefecture	2012	0.727145
Bortala Mongolian Autonomous Prefecture	2013	0.8654
Bortala Mongolian Autonomous Prefecture	2014	0.872391
Bortala Mongolian Autonomous Prefecture	2015	0.900974
Bortala Mongolian Autonomous Prefecture	2016	0.968222
Bortala Mongolian Autonomous Prefecture	2017	0.976011
Bortala Mongolian Autonomous Prefecture	2018	0.980126
Bayangol Mongolian Autonomous Prefecture	2000	0.616864
Bayangol Mongolian Autonomous Prefecture	2001	0.799827
Bayangol Mongolian Autonomous Prefecture	2002	0.795537
Bayangol Mongolian Autonomous Prefecture	2003	0.783002
Bayangol Mongolian Autonomous Prefecture	2004	0.672716
Bayangol Mongolian Autonomous Prefecture	2005	0.635041
Bayangol Mongolian Autonomous Prefecture	2006	0.695217
Bayangol Mongolian Autonomous Prefecture	2007	0.703558
Bayangol Mongolian Autonomous Prefecture	2008	0.724767
Bayangol Mongolian Autonomous Prefecture	2009	0.719632
Bayangol Mongolian Autonomous Prefecture	2010	0.660739
Bayangol Mongolian Autonomous Prefecture	2011	0.707021
Bayangol Mongolian Autonomous Prefecture	2012	0.643051
Bayangol Mongolian Autonomous Prefecture	2013	0.673408
Bayangol Mongolian Autonomous Prefecture	2014	0.714678
Bayangol Mongolian Autonomous Prefecture	2015	0.76559
Bayangol Mongolian Autonomous Prefecture	2016	0.910522
Bayangol Mongolian Autonomous Prefecture	2017	0.924718
Bayangol Mongolian Autonomous Prefecture	2018	0.927107
Aksu Administrative Offices	2000	0.958515
Aksu Administrative Offices	2001	0.938682
Aksu Administrative Offices	2002	0.913944
Aksu Administrative Offices	2003	0.912616
Aksu Administrative Offices	2004	0.887778
Aksu Administrative Offices	2005	0.889975
Aksu Administrative Offices	2006	0.845205
Aksu Administrative Offices	2007	0.884571
Aksu Administrative Offices	2008	0.873421
Aksu Administrative Offices	2009	0.845822
Aksu Administrative Offices	2010	0.875942
Aksu Administrative Offices	2011	0.87292
Aksu Administrative Offices	2012	0.863495
Aksu Administrative Offices	2013	0.887004
Aksu Administrative Offices	2014	0.902911
Aksu Administrative Offices	2015	0.934396
Aksu Administrative Offices	2016	0.975815
Aksu Administrative Offices	2017	0.973478
Aksu Administrative Offices	2018	0.974955
Kizilsu Kirgiz Autonomous Prefecture	2000	0.752699
Kizilsu Kirgiz Autonomous Prefecture	2001	0.836806
Kizilsu Kirgiz Autonomous Prefecture	2002	0.954031
Kizilsu Kirgiz Autonomous Prefecture	2003	0.964785
Kizilsu Kirgiz Autonomous Prefecture	2004	0.95564
Kizilsu Kirgiz Autonomous Prefecture	2005	0.941804
Kizilsu Kirgiz Autonomous Prefecture	2006	0.781771
Kizilsu Kirgiz Autonomous Prefecture	2007	0.855276
Kizilsu Kirgiz Autonomous Prefecture	2008	0.842065
Kizilsu Kirgiz Autonomous Prefecture	2009	0.903453
Kizilsu Kirgiz Autonomous Prefecture	2010	0.856403
Kizilsu Kirgiz Autonomous Prefecture	2011	0.816783
Kizilsu Kirgiz Autonomous Prefecture	2012	0.865232
Kizilsu Kirgiz Autonomous Prefecture	2013	0.82772
Kizilsu Kirgiz Autonomous Prefecture	2014	0.871063
Kizilsu Kirgiz Autonomous Prefecture	2015	0.866959
Kizilsu Kirgiz Autonomous Prefecture	2016	0.8525
Kizilsu Kirgiz Autonomous Prefecture	2017	0.897972
Kizilsu Kirgiz Autonomous Prefecture	2018	0.864261
Kashgar Administrative Offices	2000	0.961339
Kashgar Administrative Offices	2001	0.947207
Kashgar Administrative Offices	2002	0.948918
Kashgar Administrative Offices	2003	0.952761
Kashgar Administrative Offices	2004	0.952572
Kashgar Administrative Offices	2005	0.942299
Kashgar Administrative Offices	2006	0.929311
Kashgar Administrative Offices	2007	0.939034
Kashgar Administrative Offices	2008	0.959227
Kashgar Administrative Offices	2009	0.961591
Kashgar Administrative Offices	2010	0.932732
Kashgar Administrative Offices	2011	0.933531
Kashgar Administrative Offices	2012	0.940611
Kashgar Administrative Offices	2013	0.926995
Kashgar Administrative Offices	2014	0.937594
Kashgar Administrative Offices	2015	0.971159
Kashgar Administrative Offices	2016	0.9873
Kashgar Administrative Offices	2017	0.989233
Kashgar Administrative Offices	2018	0.988888
Hotan Administrative Offices	2000	0.964173
Hotan Administrative Offices	2001	0.94751
Hotan Administrative Offices	2002	0.951312
Hotan Administrative Offices	2003	0.968813
Hotan Administrative Offices	2004	0.967479
Hotan Administrative Offices	2005	0.976737
Hotan Administrative Offices	2006	0.948881
Hotan Administrative Offices	2007	0.955174
Hotan Administrative Offices	2008	0.985081
Hotan Administrative Offices	2009	0.961143
Hotan Administrative Offices	2010	0.982505
Hotan Administrative Offices	2011	0.980543
Hotan Administrative Offices	2012	0.959791
Hotan Administrative Offices	2013	0.978713
Hotan Administrative Offices	2014	0.966822
Hotan Administrative Offices	2015	0.939468
Hotan Administrative Offices	2016	0.973462
Hotan Administrative Offices	2017	0.966577
Hotan Administrative Offices	2018	0.974605
