# Supplementary material for: Decarbonization, Environmental Regulation, and Economic Boom: An Indicator Assessment Based on the Industrial Waste
Source: Frontiers journal article supplement (doi:10.3389/fenrg.2021.838852), 2022-02-03
Supplement: Data_Sheet_2.ZIP [file Coordinated development data.xlsx]

## Sheet: Urban-rural income ratio
Urban-rural income ratio
	2000	2001	2002	2003	2004	2005	2006	2007	2008	2009	2010	2011	2012	2013	2014	2015	2016	2017	2018
Urumqi City	2.1342	2.29231	2.25783	2.19918	2.1652	2.54494	2.24248	2.00865	2.0157	1.96145	1.92633	1.9026	1.83264	1.85317	2.02089	2.10595	2.091	2.07568	2.04357
Karamay City	2.66325	3.1787	2.45636	2.2539	2.21118	2.00847	2.02389	1.99568	1.94897	1.9547	1.67982	1.68451	1.70256	1.61905	1.73841	1.75642	1.72902	1.71844	1.70122
Turpan City	3.05223	2.80152	2.86291	2.66755	2.16152	2.04389	2.0655	2.09324	2.16166	2.25281	2.48164	2.53335	2.4753	2.441	2.39985	2.5062	2.51212	2.49796	2.46175
Hami City	3.74423	2.24742	3.65166	3.30397	3.08001	2.9046	2.76221	2.66862	2.25568	2.25483	2.25346	2.19317	2.19979	2.10587	2.12299	2.16006	2.13876	2.1383	2.12642
Changji Hui Autonomous Prefecture	1.78117	1.79595	1.77161	1.62542	1.53915	1.66681	1.67886	1.92901	1.8377	1.84995	1.58849	1.50628	1.50541	1.54534	1.57194	1.65394	1.70053	1.74411	1.79155
Counties (Cities) Direct Under Ili Prefecture	2.01358	2.60175	2.30263	2.40639	2.44953	2.27711	2.24771	2.33901	2.37136	2.43939	2.43952	2.24309	2.23154	2.17523	2.1998	2.28562	1.84829	2.29788	2.28716
Tarbagatai Administrative Offices	2.10345	1.92759	1.8516	1.57849	2.31915	2.54425	1.92777	1.94885	2.29446	2.20675	1.57421	1.54001	1.67745	1.71278	1.73978	1.84768	1.74267	1.82268	1.76766
Altay Administrative Offices	2.88583	2.60301	2.56188	2.30894	2.52738	2.35166	2.51885	2.85664	2.96906	2.99643	2.57641	2.72736	2.64616	2.53571	2.47864	2.50379	2.41789	2.51801	2.10277
Bortala Mongolian Autonomous Prefecture	1.89826	1.91753	2.16552	1.94959	1.87175	1.87966	1.82087	1.89341	1.95656	1.92294	1.79444	1.79712	1.81365	1.77351	1.77089	1.88733	4.50242	1.92805	1.91186
Bayangol Mongol ian Autonomous Prefecture	2.32734	2.14187	2.17686	2.13189	2.20751	2.11983	2.10294	2.01113	2.00475	1.84239	1.85811	1.79598	1.81421	1.81582	1.81045	1.87389	3.63779	1.88854	1.89505
Aksu Administrative Offices	3.14909	2.68017	3.06116	2.54565	2.34998	2.4048	2.34821	2.62242	2.83636	2.65943	2.46225	2.68371	2.6423	2.5459	2.50467	2.43994	3.79166	2.56884	2.5713
Kizilsu Kirgiz Autonomous Prefecture	4.32767	2.61811	5.29794	3.7065	3.69843	3.68204	3.8358	4.01018	4.1003	4.2754	4.62671	4.47368	4.9406	4.43194	4.01484	4.13415	2.14187	4.05687	3.48591
Kashgar Administrative Offices	3.87129	4.53584	4.64037	4.37247	4.32473	4.2472	4.23812	3.76358	3.94859	3.72901	3.91824	3.36634	3.18543	2.86557	2.78688	2.86932	1.57195	3.00799	2.99253
Hotan Administrative Offices	5.93829	7.37818	7.62348	6.46365	6.24947	5.85648	5.69795	5.59476	5.2106	4.98298	4.62763	4.12182	4.02839	3.73217	3.66796	3.55326	2.4076	3.56081	3.53734

## Sheet: Proportion of non-agricultural 
Proportion of non-agricultural industries
	2000	2001	2002	2003	2004	2005	2006	2007	2008	2009	2010	2011	2012	2013	2014	2015	2016	2017	2018
Urumqi City	98.58	98.73	98.57	98.535	98.5	98.5	98.7	98	98.2	98.5	98.5	98.7	98.7	98.8	98.9	98.8	98.9	99.1	99.2
Karamay City	99.63	99.7	99.68	99.69	99.7	99.6	99.6	99.5	99.5	99.3	99.5	99.4	99.4	99.4	99.4	99.2	99.1	99.3	99.4
Turpan City	87.52	89.04	89.06	88.88	88.7	89.6	90.7	90.4	90.7	86.9	86.6	87.8	86.1	84.7	83.8	78	77.4	82.3	84
Hami City	80.3	82.34	83.49	82.845	82.2	84	84.8	84.5	86.1	84.5	85.6	86.9	87.7	88.8	90.5	90.7	90.4	91.9	92.4
Changji Hui Autonomous Prefecture	63.9	67.82	68.09	68.845	69.6	68.5	70	68.9	69.9	70.2	70.2	72.9	73.5	74.5	77.3	78.1	80	82.4	83.5
Counties (Cities) Direct Under Ili Prefecture	58.51	64.05	65.36	67.83	70.3	73.1	74.7	74.9	76.7	75.8	75.8	76.6	76.3	76.3	76.1	76.8	76.2	80.4	81.2
Tarbagatai Administrative Offices	62.82	62.83	63.02	63.01	63	59	60.4	63.3	66.4	63.7	63	64.9	64.8	65.3	65.1	63.9	61.5	65.8	62.2
Altay Administrative Offices	62.47	63.33	64.78	66.54	68.3	68.9	75.5	78	78.9	76.4	78.1	80	80.1	80.4	80.7	79	77.3	82.4	81.9
Bortala Mongolian Autonomous Prefecture	57.47	60.34	61.75	60.575	59.4	69.1	69.8	68	70.9	69.9	62.4	65.3	69.2	72.9	76	77.9	77.8	81.6	80.2
Bayangol Mongol ian Autonomous Prefecture	82.48	82.25	82.19	82.295	82.4	84.8	86.3	85.3	87.7	84	83.1	83.7	82.9	82.6	83.5	82.5	78	81.7	84.9
Aksu Administrative Offices	53.89	57.5	58.68	60.44	62.2	60.4	61.5	63.3	65.7	65.8	65.2	68.1	68.7	68.2	70.6	70.8	70.6	75.4	74.8
Kizilsu Kirgiz Autonomous Prefecture	59.06	66.59	67.57	68.735	69.9	69.8	72.8	74.7	76.2	77.2	79.9	81.2	82.9	84.1	85.3	85.8	85	88.2	87.9
Kashgar Administrative Offices	45.75	47.59	49.04	52.42	55.8	56.45	57.1	57.75	58.4	59.4	57.8	64.1	66.1	69	70	70.9	65.8	68.5	68.4
Hotan Administrative Offices	44.72	46.78	48.67	51.335	54	54.8	59.7	59.9	61.1	64.1	64.9	67.9	69	69.1	70.5	73.2	72.6	77.7	77.5

## Sheet: Gini coefficient of GDP per cap
Gini coefficient of GDP per capita
	2000	2001	2002	2003	2004	2005	2006	2007	2008	2009	2010	2011	2012	2013	2014	2015	2016	2017	2018
Urumqi City	0.151235	0.245866	0.204638	0.205126	0.200699	0.212049	0.220132	0.241174	0.269078	0.143895	0.163007	0.270326	0.294231	0.293829	0.298424	0.280416	0.304404	0.311647	0.298748
Karamay City	0.259001	0.483975	0.315508	0.300147	0.411777	0.550915	0.569498	0.592003	0.612024	0.507996	0.545074	0.563878	0.596856	0.6127	0.668168	0.543658	0.625715	0.60746	0.605018
Turpan City	0.341674	0.340104	0.312768	0.326947	0.337914	0.358583	0.349529	0.334395	0.326579	0.205932	0.196242	0.222064	0.211376	0.209899	0.186426	0.0771677	0.0983712	0.135119	0.154777
Hami City	0.161807	0.148802	0.134843	0.130429	0.127557	0.173518	0.189308	0.188356	0.36343	0.192298	0.183871	0.193127	0.236449	0.287058	0.326512	0.314311	0.331035	0.341939	0.354257
Changji Hui Autonomous Prefecture	0.185692	0.188445	0.19165	0.175416	0.184094	0.187182	0.186153	0.196462	0.190227	0.173531	0.177706	0.173046	0.166739	0.13687	0.1656	0.151382	0.15021	0.160121	0.194041
Counties (Cities) Direct Under Ili Prefecture	0.22751	0.226355	0.211385	0.207015	0.212109	0.275369	0.281539	0.288855	0.291419	0.293933	0.284499	0.300798	0.302786	0.297871	0.26383	0.247155	0.249099	0.259106	0.316051
Tarbagatai Administrative Offices	0.154255	0.133496	0.131128	0.125323	0.111541	0.102754	0.117051	0.104778	0.117752	0.125611	0.151118	0.140759	0.156217	0.128629	0.148282	0.119613	0.108153	0.114572	0.137499
Altay Administrative Offices	0.101819	0.11222	0.115131	0.135482	0.177262	0.15908	0.244991	0.266856	0.287702	0.215599	0.220057	0.235653	0.254067	0.209732	0.190021	0.151437	0.136579	0.135489	0.135364
Bortala Mongolian Autonomous Prefecture	0.0862891	0.0813562	0.0829747	0.0754746	0.0795296	0.199862	0.190435	0.18371	0.193307	0.184971	0.161648	0.174798	0.180181	0.179762	0.372052	0.391965	0.431715	0.436685	0.43651
Bayangol Mongol ian Autonomous Prefecture	0.326633	0.310781	0.291699	0.295638	0.297069	0.309205	0.326904	0.309983	0.319513	0.464591	0.263098	0.314541	0.273021	0.252264	0.249632	0.287982	0.234308	0.219662	0.23937
Aksu Administrative Offices	0.212464	0.209646	0.196834	0.21138	0.188568	0.175059	0.179368	0.18719	0.141399	0.17974	0.195325	0.196303	0.185425	0.164983	0.176978	0.168998	0.174087	0.197567	0.205392
Kizilsu Kirgiz Autonomous Prefecture	0.127707	0.122908	0.131353	0.11843	0.108755	0.106769	0.101941	0.159664	0.113243	0.141822	0.156482	0.163464	0.163645	0.198425	0.210887	0.204534	0.199437	0.273697	0.281873
Kashgar Administrative Offices	0.177689	0.167801	0.180305	0.181203	0.191213	0.198345	0.196986	0.191676	0.18998	0.196095	0.161772	0.178797	0.183687	0.18235	0.188706	0.170064	0.137761	0.14617	0.146442
Hotan Administrative Offices	0.153277	0.124543	0.120651	0.143351	0.157655	0.1799	0.191205	0.195303	0.206646	0.204123	0.203692	0.18039	0.18871	0.183439	0.228968	0.23033	0.234731	0.242047	0.25247
