# Supplementary material for: Decarbonization, Environmental Regulation, and Economic Boom: An Indicator Assessment Based on the Industrial Waste
Source: Frontiers journal article supplement (doi:10.3389/fenrg.2021.838852), 2022-02-03
Supplement: Data_Sheet_2.ZIP [file Environmental regulation data (waste water, waste gas, waste residue).xlsx]

## Sheet: Sheet1
		Waste gas		Waste water		Waste residue
name	year	Industrial exhaust emissions/ GDP	Industrial SO2 emission / GDP	Industrial wastewater discharge /GDP	Industrial chemical oxygen demand emissions/ GDP	Production of industrial solid waste/GDP
Urumqi City	2000	2.04925	0.0182787	14.3603	0.000566718	0.591248
Urumqi City	2001	2.72313	0.0237161	16.235	0.00129678	0.801946
Urumqi City	2002	2.65571	0.0224158	14.2069	0.00116353	0.770706
Urumqi City	2003	2.37631	0.0200601	10.9865	0.000874795	0.7929
Urumqi City	2004	2.29852	0.0199499	10.2746	0.00076881	0.726282
Urumqi City	2005	2.35012	0.0194456	8.63799	0.000806268	0.705383
Urumqi City	2006	2.39536	0.0215196	8.33008	0.00112513	0.523718
Urumqi City	2007	2.70749	0.0196193	7.76427	0.00150644	0.765864
Urumqi City	2008	2.624	0.0171497	7.98567	0.00114159	0.725142
Urumqi City	2009	1.8948	0.0128867	7.18068	0.00105702	0.655027
Urumqi City	2010	2.35177	0.00999538	6.15461	0.00077436	0.731957
Urumqi City	2011	2.99574	0.0118673	4.41904	0.000744844	0.917422
Urumqi City	2012	2.83663	0.00922709	4.4925	0.000532417	1.01638
Urumqi City	2013	2.39681	0.0050439	3.32279	0.000404367	0.766284
Urumqi City	2014	2.50223	0.00438223	2.98205	0.000329185	0.591895
Urumqi City	2015	1.79205	0.00328999	1.95987	0.000305949	0.433632
Urumqi City	2016	1.44287	0.00219817	2.32192	0.000212091	0.396998
Urumqi City	2017	1.77026	0.00179368	1.59691	0.000157324	0.447782
Urumqi City	2018	1.53049	0.000785509	1.21588	0.00012582	0.433409
Karamay City	2000	2.20253	0.00547807	17.3587	0.00599361	0.153413
Karamay City	2001	2.32052	0.0065903	17.2807	0.00411344	0.124671
Karamay City	2002	2.10425	0.00633925	15.5893	0.00167366	0.126988
Karamay City	2003	2.47281	0.00690354	13.6451	0.00126325	0.138327
Karamay City	2004	2.65246	0.0125901	9.91423	0.00111237	0.15474
Karamay City	2005	2.83554	0.0123769	8.60364	0.000931081	0.161845
Karamay City	2006	2.50642	0.0112974	5.43624	0.000695272	0.19088
Karamay City	2007	2.20321	0.00958259	6.42322	0.000793382	0.147329
Karamay City	2008	2.11522	0.00875664	5.78485	0.000508966	0.145487
Karamay City	2009	2.53347	0.0162719	5.34655	0.000481478	0.14818
Karamay City	2010	3.05398	0.0145994	5.34399	0.000543274	0.347282
Karamay City	2011	2.96696	0.0152689	5.28996	0.000549412	0.176018
Karamay City	2012	3.13401	0.0142877	5.19445	0.000619999	0.284521
Karamay City	2013	3.27141	0.0125582	13.395	0.000570702	0.220206
Karamay City	2014	3.32108	0.00905523	5.06563	0.000436693	0.282391
Karamay City	2015	3.02892	0.00607232	3.93197	0.000400437	0.281313
Karamay City	2016	2.79077	0.00327979	4.08332	0.000362402	0.337278
Karamay City	2017	2.59093	0.00224505	3.41137	0.000223865	0.352426
Karamay City	2018	2.43064	0.00200829	3.37854	0.000259434	0.33061
Turpan City	2000	0.588173	0.00529976	1.10005	0.000416786	0.212844
Turpan City	2001	1.49489	0.00707494	1.23707	0.000844657	1.11055
Turpan City	2002	1.42813	0.00665861	0.963954	0.000556288	0.739049
Turpan City	2003	1.15876	0.0075019	0.87408	0.000335311	0.631321
Turpan City	2004	2.34538	0.0223129	0.861497	0.000190731	0.537536
Turpan City	2005	2.42946	0.0196048	0.681599	0.000146718	0.525255
Turpan City	2006	0.853481	0.0131037	0.786009	0.000131228	0.546416
Turpan City	2007	2.4175	0.0296617	0.136861	8.19851e-05	0.878343
Turpan City	2008	1.7414	0.0253354	0.0676342	0.000177856	0.936394
Turpan City	2009	1.6105	0.0165776	1.24686	0.000112381	1.45739
Turpan City	2010	1.96058	0.0135212	0.164487	0.000160439	0.994997
Turpan City	2011	2.18726	0.0124742	0.228101	8.86108e-05	1.71093
Turpan City	2012	2.81428	0.0114489	0.232208	0.000142528	2.24732
Turpan City	2013	4.38526	0.0220367	0.764404	0.000416711	1.77878
Turpan City	2014	2.95315	0.0100534	0.497754	0.000924168	1.71113
Turpan City	2015	2.59042	0.0208369	0.172108	0.000303844	1.09387
Turpan City	2016	2.73635	0.00669297	0.206069	3.2711e-05	1.16963
Turpan City	2017	4.80855	0.00575465	0.0422523	5.14667e-06	1.41524
Turpan City	2018	3.85785	0.00354929	0.107043	2.58584e-05	1.42212
Hami City	2000	1.85885	0.0263685	8.0495	0.000768225	0.84083
Hami City	2001	2.15551	0.0269852	12.0176	0.0011588	0.930477
Hami City	2002	2.56536	0.0287532	15.3307	0.00504293	0.957309
Hami City	2003	2.72755	0.0443728	16.2816	0.00361328	1.61798
Hami City	2004	4.93647	0.0850273	22.2423	0.00198897	3.0949
Hami City	2005	5.24521	0.0816086	20.4245	0.00182238	4.269
Hami City	2006	3.44539	0.0548815	15.2799	0.000635567	4.18403
Hami City	2007	4.05443	0.0567826	27.9526	0.00240978	5.56799
Hami City	2008	3.18247	0.0778045	12.0351	0.00171714	7.98484
Hami City	2009	3.29649	0.0554636	10.1296	0.000945439	7.06942
Hami City	2010	3.1748	0.0421279	9.61865	0.000812887	5.93999
Hami City	2011	2.35136	0.0351644	2.50655	0.000166742	4.22234
Hami City	2012	3.88448	0.0307239	3.723	0.000390564	8.40575
Hami City	2013	3.29071	0.0211757	3.66643	0.000309115	8.85376
Hami City	2014	3.31808	0.0219025	3.854	0.00103187	4.93425
Hami City	2015	5.16835	0.0229019	1.57619	0.000581979	5.75801
Hami City	2016	4.9901	0.0171873	0.753326	8.3424e-05	5.49721
Hami City	2017	7.36783	0.0119396	0.465863	6.24271e-05	4.89527
Hami City	2018	6.04309	0.00699457	0.550453	8.20016e-05	5.43446
Changji Hui Autonomous Prefecture	2000	2.42415	0.0246413	12.0416	0.0137445	0.303224
Changji Hui Autonomous Prefecture	2001	2.02275	0.0241474	12.3049	0.00422758	0.577271
Changji Hui Autonomous Prefecture	2002	2.19716	0.0215061	9.37817	0.00400783	1.43997
Changji Hui Autonomous Prefecture	2003	2.72791	0.0242612	8.8604	0.0118014	1.27197
Changji Hui Autonomous Prefecture	2004	2.13182	0.0233369	9.97725	0.00664895	0.645443
Changji Hui Autonomous Prefecture	2005	2.30094	0.0250106	11.3833	0.00816307	0.531203
Changji Hui Autonomous Prefecture	2006	2.1221	0.0163382	9.60895	0.00600921	0.471794
Changji Hui Autonomous Prefecture	2007	2.2491	0.0179096	7.27393	0.00380508	0.44037
Changji Hui Autonomous Prefecture	2008	2.44981	0.0176716	8.29498	0.00443262	0.502086
Changji Hui Autonomous Prefecture	2009	1.97768	0.0196751	7.79016	0.0042933	0.407924
Changji Hui Autonomous Prefecture	2010	2.56779	0.0162399	6.98776	0.0043015	0.676029
Changji Hui Autonomous Prefecture	2011	2.11222	0.0180732	5.81227	0.00290701	0.510826
Changji Hui Autonomous Prefecture	2012	2.65848	0.0108633	5.28007	0.00381284	2.34678
Changji Hui Autonomous Prefecture	2013	4.3394	0.013937	4.59985	0.00341867	2.27031
Changji Hui Autonomous Prefecture	2014	3.72745	0.016502	2.82445	0.00280963	1.13613
Changji Hui Autonomous Prefecture	2015	3.76218	0.0121495	1.90849	0.00260491	1.31246
Changji Hui Autonomous Prefecture	2016	4.82806	0.00461694	2.28231	0.000650041	1.07017
Changji Hui Autonomous Prefecture	2017	4.76224	0.00378999	1.86015	0.000411521	1.05517
Changji Hui Autonomous Prefecture	2018	5.02932	0.0038558	1.49007	0.000484793	1.12774
Counties (Cities) Direct Under Ili Prefecture	2000	0.272815	0.00245416	3.828	0.0174987	0.0731033
Counties (Cities) Direct Under Ili Prefecture	2001	0.866696	0.00919552	3.86597	0.00904336	1.16238
Counties (Cities) Direct Under Ili Prefecture	2002	1.68418	0.0162756	5.37382	0.0101967	0.892574
Counties (Cities) Direct Under Ili Prefecture	2003	1.64993	0.0158556	6.32677	0.0109297	0.563587
Counties (Cities) Direct Under Ili Prefecture	2004	1.82363	0.0143744	7.12703	0.0106769	0.458701
Counties (Cities) Direct Under Ili Prefecture	2005	1.77426	0.0159129	7.32562	0.0102221	0.49974
Counties (Cities) Direct Under Ili Prefecture	2006	2.33807	0.0207674	6.43792	0.00814721	0.524919
Counties (Cities) Direct Under Ili Prefecture	2007	2.36365	0.0140563	8.71949	0.0136239	0.642123
Counties (Cities) Direct Under Ili Prefecture	2008	2.41185	0.0139604	9.3947	0.00971801	0.587985
Counties (Cities) Direct Under Ili Prefecture	2009	2.8205	0.0136576	8.31034	0.00695702	0.586722
Counties (Cities) Direct Under Ili Prefecture	2010	2.9032	0.0114054	7.81599	0.00697997	0.706898
Counties (Cities) Direct Under Ili Prefecture	2011	1.63775	0.00955343	4.39029	0.00405325	1.03959
Counties (Cities) Direct Under Ili Prefecture	2012	2.15392	0.0096707	4.40979	0.00130448	1.15969
Counties (Cities) Direct Under Ili Prefecture	2013	3.235	0.011748	3.7509	0.00123844	1.98066
Counties (Cities) Direct Under Ili Prefecture	2014	4.60999	0.00973303	3.48222	0.00184387	1.1577
Counties (Cities) Direct Under Ili Prefecture	2015	2.3004	0.00735049	2.64997	0.00148436	0.632866
Counties (Cities) Direct Under Ili Prefecture	2016	2.32861	0.00332468	2.15207	0.000125819	1.13975
Counties (Cities) Direct Under Ili Prefecture	2017	1.78598	0.00186438	2.13671	0.000261422	2.28722
Counties (Cities) Direct Under Ili Prefecture	2018	2.77286	0.00166305	1.8269	0.000148989	1.62966
Tarbagatai Administrative Offices	2000	0.612263	0.00625478	1.82663	0.00249617	0.136789
Tarbagatai Administrative Offices	2001	0.578606	0.00249351	2.43383	0.00366129	0.131499
Tarbagatai Administrative Offices	2002	0.757292	0.0032413	2.69956	0.00435363	0.192721
Tarbagatai Administrative Offices	2003	1.20026	0.00435201	3.13995	0.00322347	0.177562
Tarbagatai Administrative Offices	2004	1.22522	0.00477694	5.14338	0.00326499	0.133637
Tarbagatai Administrative Offices	2005	1.28306	0.00569584	6.39108	0.00482511	0.122912
Tarbagatai Administrative Offices	2006	0.865649	0.00925837	4.33431	0.0073998	0.163371
Tarbagatai Administrative Offices	2007	0.878799	0.00869159	5.83294	0.00823083	0.225648
Tarbagatai Administrative Offices	2008	0.907166	0.00833016	6.22993	0.00828104	0.342394
Tarbagatai Administrative Offices	2009	1.44088	0.00748745	4.81939	0.00943688	0.251834
Tarbagatai Administrative Offices	2010	0.512798	0.00555656	5.87124	0.0101871	0.317187
Tarbagatai Administrative Offices	2011	1.00584	0.00772817	5.57112	0.00711778	0.490382
Tarbagatai Administrative Offices	2012	1.25476	0.00521604	3.38697	0.00247107	0.536049
Tarbagatai Administrative Offices	2013	1.51557	0.00470496	2.38883	0.00211764	0.56792
Tarbagatai Administrative Offices	2014	1.58442	0.00451149	2.56369	0.00221602	0.420628
Tarbagatai Administrative Offices	2015	1.38303	0.00222004	2.7754	0.000862384	0.332532
Tarbagatai Administrative Offices	2016	1.04094	0.0013829	2.82582	0.000316546	0.321369
Tarbagatai Administrative Offices	2017	0.731445	0.000981307	1.89619	0.000182525	0.345948
Tarbagatai Administrative Offices	2018	0.845929	0.000859549	2.15586	0.000227267	0.37989
Altay Administrative Offices	2000	1.62519	0.0403179	16.6378	0.0148797	1.49154
Altay Administrative Offices	2001	1.18015	0.0249294	15.1932	0.0125866	1.40092
Altay Administrative Offices	2002	0.855222	0.0221662	13.7869	0.014156	0.962439
Altay Administrative Offices	2003	0.911107	0.0208437	12.2946	0.0150594	1.51262
Altay Administrative Offices	2004	2.44396	0.0213847	12.422	0.0164585	1.83627
Altay Administrative Offices	2005	1.42446	0.0262796	10.991	0.0129255	2.26232
Altay Administrative Offices	2006	1.27414	0.0552612	7.98185	0.0185328	2.79822
Altay Administrative Offices	2007	1.38411	0.0666749	10.82	0.0059832	3.85183
Altay Administrative Offices	2008	2.14047	0.0541993	4.53053	0.00570286	2.98512
Altay Administrative Offices	2009	2.28853	0.0542696	3.20101	0.000733098	6.94932
Altay Administrative Offices	2010	1.70745	0.0535482	3.15902	0.00147173	9.36825
Altay Administrative Offices	2011	1.94707	0.0796479	6.98384	0.00203122	12.3292
Altay Administrative Offices	2012	1.9693	0.0895645	3.11629	0.001664	10.3521
Altay Administrative Offices	2013	2.09887	0.0847682	3.87133	0.00061903	10.1109
Altay Administrative Offices	2014	1.65323	0.0625137	4.03499	0.000678128	9.30703
Altay Administrative Offices	2015	1.2655	0.0720403	3.22272	0.000578665	8.12458
Altay Administrative Offices	2016	1.24671	0.00870345	2.9799	0.000614951	6.98329
Altay Administrative Offices	2017	1.123	0.00946271	16.24	0.000813919	7.05246
Altay Administrative Offices	2018	1.10162	0.00970029	8.50849	0.000782213	7.28449
Bortala Mongolian Autonomous Prefecture	2000	0.884582	0.0130609	6.12273	0.0138569	0.740832
Bortala Mongolian Autonomous Prefecture	2001	0.631669	0.00781913	6.91113	0.0083076	0.87701
Bortala Mongolian Autonomous Prefecture	2002	1.65752	0.0114555	11.9525	0.00785287	1.21179
Bortala Mongolian Autonomous Prefecture	2003	1.58398	0.0115654	12.4468	0.00881758	0.824382
Bortala Mongolian Autonomous Prefecture	2004	2.31297	0.0131626	11.1223	0.00916789	0.795712
Bortala Mongolian Autonomous Prefecture	2005	1.80284	0.0120579	9.32721	0.0080974	0.172802
Bortala Mongolian Autonomous Prefecture	2006	1.55243	0.0120373	7.10831	0.00588772	0.205046
Bortala Mongolian Autonomous Prefecture	2007	1.32777	0.0114425	6.04715	0.0141484	0.519347
Bortala Mongolian Autonomous Prefecture	2008	1.35416	0.00875081	5.62432	0.0141057	0.411557
Bortala Mongolian Autonomous Prefecture	2009	1.53802	0.0111659	6.40584	0.0139402	0.266936
Bortala Mongolian Autonomous Prefecture	2010	2.54513	0.00988	8.8489	0.0264309	0.217532
Bortala Mongolian Autonomous Prefecture	2011	2.72607	0.00798102	9.8857	0.0228841	0.251084
Bortala Mongolian Autonomous Prefecture	2012	1.48809	0.00888058	8.38646	0.0176132	0.353908
Bortala Mongolian Autonomous Prefecture	2013	1.51884	0.00838802	3.54186	0.00779989	0.234809
Bortala Mongolian Autonomous Prefecture	2014	1.2957	0.00831367	4.38683	0.00655222	0.241942
Bortala Mongolian Autonomous Prefecture	2015	1.21582	0.00376707	3.94433	0.00538812	0.134787
Bortala Mongolian Autonomous Prefecture	2016	1.20889	0.00334767	2.02935	0.000219381	0.132009
Bortala Mongolian Autonomous Prefecture	2017	1.31971	0.00219448	1.31835	0.000172253	0.160614
Bortala Mongolian Autonomous Prefecture	2018	1.12199	0.00191349	1.06935	0.000145919	0.161642
Bayangol Mongolian Autonomous Prefecture	2000	0.85429	0.00789388	19.1204	0.0199406	0.832694
Bayangol Mongolian Autonomous Prefecture	2001	0.900419	0.00642303	11.0286	0.0094771	0.131838
Bayangol Mongolian Autonomous Prefecture	2002	0.651506	0.00677215	11.1179	0.00824826	1.06461
Bayangol Mongolian Autonomous Prefecture	2003	0.802699	0.00763641	10.6649	0.00974647	0.968797
Bayangol Mongolian Autonomous Prefecture	2004	1.92266	0.0119278	15.4487	0.0155012	0.865578
Bayangol Mongolian Autonomous Prefecture	2005	1.56535	0.0112253	13.713	0.0213745	0.724079
Bayangol Mongolian Autonomous Prefecture	2006	1.2788	0.00680371	12.4359	0.0174659	0.789069
Bayangol Mongolian Autonomous Prefecture	2007	1.08948	0.00842263	10.4753	0.0182618	0.59153
Bayangol Mongolian Autonomous Prefecture	2008	0.825255	0.00805821	12.3523	0.0148243	0.605432
Bayangol Mongolian Autonomous Prefecture	2009	1.1241	0.006869	13.854	0.0140239	0.73196
Bayangol Mongolian Autonomous Prefecture	2010	1.91723	0.00982437	15.4887	0.0168586	1.06682
Bayangol Mongolian Autonomous Prefecture	2011	2.16074	0.0105397	12.5554	0.0144697	0.912569
Bayangol Mongolian Autonomous Prefecture	2012	5.7537	0.0115066	15.6496	0.0159234	0.961658
Bayangol Mongolian Autonomous Prefecture	2013	2.81161	0.011428	14.6479	0.0158961	0.729424
Bayangol Mongolian Autonomous Prefecture	2014	1.86793	0.00807511	14.0693	0.0136117	0.720696
Bayangol Mongolian Autonomous Prefecture	2015	1.19726	0.00460359	9.57845	0.0141616	0.263911
Bayangol Mongolian Autonomous Prefecture	2016	1.23567	0.00234392	4.95707	0.000418296	2.11972
Bayangol Mongolian Autonomous Prefecture	2017	1.59164	0.00177277	4.48466	0.000302878	1.54532
Bayangol Mongolian Autonomous Prefecture	2018	1.99793	0.00174298	4.38338	0.000351781	1.29061
Aksu Administrative Offices	2000	0.809178	0.00627775	1.36845	0.00125187	0.130361
Aksu Administrative Offices	2001	0.496854	0.00351843	1.75382	0.00381776	0.142829
Aksu Administrative Offices	2002	1.53562	0.00463194	2.39038	0.004569	0.326721
Aksu Administrative Offices	2003	1.40328	0.00440749	2.66105	0.00456267	0.360935
Aksu Administrative Offices	2004	1.82768	0.01378	3.73593	0.00355289	0.389198
Aksu Administrative Offices	2005	1.67066	0.00780547	4.56185	0.00429463	0.369891
Aksu Administrative Offices	2006	3.22545	0.0141772	3.79267	0.00643064	0.635133
Aksu Administrative Offices	2007	2.20053	0.0123964	5.4568	0.0025123	0.443029
Aksu Administrative Offices	2008	2.14323	0.0105032	6.03661	0.00384864	0.35228
Aksu Administrative Offices	2009	2.5094	0.00989572	8.06974	0.00432693	0.69586
Aksu Administrative Offices	2010	2.66689	0.0077857	6.60338	0.00316211	0.539403
Aksu Administrative Offices	2011	2.06749	0.0066511	6.3203	0.0045035	0.454021
Aksu Administrative Offices	2012	3.25324	0.00729254	5.75659	0.00465705	0.659752
Aksu Administrative Offices	2013	3.33074	0.00566182	4.18743	0.00420887	0.484465
Aksu Administrative Offices	2014	2.57482	0.00493178	3.37738	0.00373529	0.575197
Aksu Administrative Offices	2015	1.47389	0.00214616	2.71168	0.00276818	0.398317
Aksu Administrative Offices	2016	0.940333	0.000997783	1.78466	0.000150292	0.273202
Aksu Administrative Offices	2017	1.17089	0.00114677	1.85828	0.00014618	0.274528
Aksu Administrative Offices	2018	1.21505	0.00099406	1.64241	0.000133476	0.301502
Kizilsu Kirgiz Autonomous Prefecture	2000	1.43024	0.0128098	22.1058	0.00291027	0.406347
Kizilsu Kirgiz Autonomous Prefecture	2001	2.15463	0.00678846	7.18745	0.00762611	0.317051
Kizilsu Kirgiz Autonomous Prefecture	2002	1.33069	0.00688025	2.24285	0.000355567	0.227938
Kizilsu Kirgiz Autonomous Prefecture	2003	1.38922	0.00513197	1.68549	0.00026473	0.144266
Kizilsu Kirgiz Autonomous Prefecture	2004	1.92648	0.00339072	2.17617	0.00100101	0.0892792
Kizilsu Kirgiz Autonomous Prefecture	2005	2.35677	0.00427331	3.12427	0.00101015	0.170345
Kizilsu Kirgiz Autonomous Prefecture	2006	13.9526	0.0147009	8.69267	0.00163659	0.9365
Kizilsu Kirgiz Autonomous Prefecture	2007	2.47707	0.0159249	8.37943	0.00197322	0.49929
Kizilsu Kirgiz Autonomous Prefecture	2008	1.64233	0.012877	10.9325	0.0018846	0.865383
Kizilsu Kirgiz Autonomous Prefecture	2009	0.901316	0.0139248	2.35432	0.000860771	1.93603
Kizilsu Kirgiz Autonomous Prefecture	2010	13.0253	0.0065718	2.94144	0.0014775	0.842249
Kizilsu Kirgiz Autonomous Prefecture	2011	2.24977	0.00811586	5.87822	0.000892449	5.62189
Kizilsu Kirgiz Autonomous Prefecture	2012	2.17412	0.00861825	1.3877	0.000834147	4.88017
Kizilsu Kirgiz Autonomous Prefecture	2013	1.92365	0.00644792	1.30513	0.000648644	7.55771
Kizilsu Kirgiz Autonomous Prefecture	2014	1.90838	0.00605855	0.369629	0.000141942	5.85201
Kizilsu Kirgiz Autonomous Prefecture	2015	0.78182	0.00250353	0.0424637	3.93551e-05	7.18531
Kizilsu Kirgiz Autonomous Prefecture	2016	0.46891	0.00146916	0.113306	1.52428e-05	8.24716
Kizilsu Kirgiz Autonomous Prefecture	2017	0.432691	0.00125051	0.105913	5.50883e-06	5.70241
Kizilsu Kirgiz Autonomous Prefecture	2018	0.40968	0.00109925	0.0996367	9.26984e-06	7.65776
Kashgar Administrative Offices	2000	0.364456	0.00199108	4.43741	2.65203e-05	0.0255924
Kashgar Administrative Offices	2001	0.413222	0.00386558	2.93329	0.00199553	0.125868
Kashgar Administrative Offices	2002	0.612521	0.00380367	3.05302	0.00173582	0.0595557
Kashgar Administrative Offices	2003	0.776372	0.00489282	2.92322	0.00105918	0.0689693
Kashgar Administrative Offices	2004	0.843258	0.00549491	3.07606	0.000745675	0.0785348
Kashgar Administrative Offices	2005	1.13829	0.00703308	3.60312	0.000723446	0.119107
Kashgar Administrative Offices	2006	0.373904	0.00861781	3.52535	0.00122556	0.655073
Kashgar Administrative Offices	2007	0.307112	0.00562413	3.68946	0.00086075	0.676446
Kashgar Administrative Offices	2008	0.729416	0.00550006	2.63125	0.000481616	0.0875626
Kashgar Administrative Offices	2009	0.520606	0.00574195	2.14997	0.000546664	0.172564
Kashgar Administrative Offices	2010	1.48317	0.0064321	3.79616	0.00105706	0.355447
Kashgar Administrative Offices	2011	1.24096	0.00973673	2.59906	0.00116963	0.406985
Kashgar Administrative Offices	2012	1.6953	0.00868114	1.94724	0.00100825	0.38057
Kashgar Administrative Offices	2013	2.35849	0.00806448	1.11821	0.000763032	1.52927
Kashgar Administrative Offices	2014	1.93158	0.00438759	1.51573	0.000879922	1.3451
Kashgar Administrative Offices	2015	1.26673	0.00325412	0.984146	0.00059669	0.219307
Kashgar Administrative Offices	2016	0.798061	0.00196973	0.358103	0.000163425	0.169179
Kashgar Administrative Offices	2017	0.838805	0.00151956	0.309773	0.000108983	0.160722
Kashgar Administrative Offices	2018	0.763428	0.00148893	0.20357	0.000126205	0.249427
Hotan Administrative Offices	2000	0.61905	0.00628177	1.86211	0.000238082	0.218885
Hotan Administrative Offices	2001	0.86246	0.0100563	1.69634	0.000225893	0.635201
Hotan Administrative Offices	2002	0.9449	0.00751909	1.89382	0.000351601	0.587445
Hotan Administrative Offices	2003	0.820762	0.00561085	1.40032	0.000478847	0.0527511
Hotan Administrative Offices	2004	0.877895	0.00468825	1.67896	0.00050644	0.0974693
Hotan Administrative Offices	2005	0.830331	0.00396238	1.05105	0.000352084	0.0593788
Hotan Administrative Offices	2006	4.77682	0.00752913	0.620217	0.000257214	0.0264116
Hotan Administrative Offices	2007	5.13319	0.00375779	0.821472	0.000166046	0.0359157
Hotan Administrative Offices	2008	1.06151	0.0027656	0.424863	0.000195281	0.0438967
Hotan Administrative Offices	2009	4.96921	0.00273712	0.519425	7.74951e-05	0.0828276
Hotan Administrative Offices	2010	1.62269	0.00264194	0.406827	0.00014471	0.0504542
Hotan Administrative Offices	2011	0.830651	0.00350064	0.473435	0.000426365	0.127382
Hotan Administrative Offices	2012	1.38489	0.0112361	0.370776	0.000187562	0.208892
Hotan Administrative Offices	2013	1.81447	0.00304893	0.235003	0.000174375	0.204311
Hotan Administrative Offices	2014	3.9516	0.00283362	0.180015	0.000120001	0.227984
Hotan Administrative Offices	2015	3.7155	0.0146282	0.159466	0.000115941	0.218268
Hotan Administrative Offices	2016	2.45082	0.00420593	0.140302	3.86355e-05	0.239389
Hotan Administrative Offices	2017	4.85324	0.0014482	0.128073	0.000127486	0.144132
Hotan Administrative Offices	2018	3.71511	0.00161434	0.0735325	0.000116825	0.0877479
