# Supplementary material for: Decarbonization, Environmental Regulation, and Economic Boom: An Indicator Assessment Based on the Industrial Waste
Source: Frontiers journal article supplement (doi:10.3389/fenrg.2021.838852), 2022-02-03
Supplement: Data_Sheet_2.ZIP [file Green development data.xlsx]

## Sheet: Energy consumption per 10 thous
Energy consumption per 10 thousand yuan GDP
	2000	2001	2002	2003	2004	2005	2006	2007	2008	2009	2010	2011	2012	2013	2014	2015	2016	2017	2018
Urumqi City	4.38896	4.53711	4.35355	4.26755	4.18347	4.13926	4.00641	3.75207	3.67855	3.37479	3.33306	3.35187	2.92585	2.49278	2.42906	2.02281	1.7234	1.86514	1.79764
Karamay City	9.04976	8.99391	8.7428	8.93187	9.38284	9.52788	8.5394	7.89728	7.70653	8.40484	9.06282	9.2713	9.08146	9.22288	9.61201	8.371	8.62375	7.92617	7.46737
Turpan City	1.54006	1.0761	0.882968	0.80714	1.16155	1.36982	1.49898	1.89447	2.2226	2.36418	3.36109	4.0453	4.17333	4.44591	3.83986	3.09469	3.65814	4.66964	4.55665
Hami City	1.96661	1.91815	2.01739	2.08424	2.43578	2.40872	2.5501	2.33587	2.24291	2.71055	2.66269	2.7793	3.30469	5.3847	8.26147	5.79728	6.31919	5.39138	6.65163
Changji Hui Autonomous Prefecture	1.9931	1.76712	1.65345	1.59504	1.85746	1.64063	1.63917	1.74843	2.12747	2.46709	2.90606	3.41489	3.24677	4.08167	4.45508	4.52215	4.40112	4.32918	4.13186
Counties (Cities) Direct Under Ili Prefecture	0.998443	1.25456	1.31692	1.16662	1.23415	1.48239	1.80574	1.78456	1.68808	1.84912	2.09963	2.00075	2.01073	2.63997	2.73582	1.79019	1.79589	1.76325	1.61945
Tarbagatai Administrative Offices	0.609516	0.597269	0.714221	0.751356	0.770433	0.671311	0.704432	0.704309	0.607316	0.526088	0.764539	0.812527	0.899526	0.862449	0.895904	0.604943	0.589881	0.668528	0.604192
Altay Administrative Offices	0.73511	0.68385	0.644583	0.526005	0.458269	0.574825	0.504825	0.639743	0.683107	0.733303	0.831446	0.96792	0.553939	0.663198	1.12885	0.763739	0.980031	1.14748	1.1674
Bortala Mongolian Autonomous Prefecture	0.792375	0.764326	0.783955	0.702479	0.8712	0.749037	0.534275	0.609394	0.714965	0.898602	0.952323	0.832178	0.747191	0.901413	0.823491	0.573888	0.607831	0.640192	0.572764
Bayangol Mongol ian Autonomous Prefecture	1.44666	2.33974	1.77953	2.15691	2.10974	1.74004	1.82785	1.68143	1.83559	1.9935	2.16853	2.17189	2.1629	2.42635	2.0552	1.72618	1.62875	1.76817	1.79956
Aksu Administrative Offices	0.787011	0.963127	1.34818	1.32834	1.48057	2.61761	2.96118	3.15987	2.70916	2.87122	3.00865	3.56647	3.48835	3.58178	3.61411	2.75644	2.31489	2.36905	2.33297
Kizilsu Kirgiz Autonomous Prefecture	0.80784	0.24955	0.288937	0.252569	0.407221	0.0449818	0.0617099	0.0727037	0.0999747	0.146799	0.612681	0.832752	0.903927	1.10638	0.753763	0.53805	0.637123	0.663403	0.412522
Kashgar Administrative Offices	0.323013	0.238874	0.325474	0.328692	0.346975	0.423882	0.389985	0.420142	0.406881	0.409196	0.330208	0.367772	0.351645	0.332257	0.235803	0.299654	0.257511	0.254983	0.237786
Hotan Administrative Offices	0.616577	0.418962	0.374623	0.318184	0.344068	0.302207	0.311797	0.395463	0.351525	0.366766	0.3251	0.256526	0.222236	0.323425	0.268289	0.265033	0.338532	0.285186	0.329703

## Sheet: Greenery coverage in built-up a
Greenery coverage in built-up areas
	2000	2001	2002	2003	2004	2005	2006	2007	2008	2009	2010	2011	2012	2013	2014	2015	2016	2017	2018
Urumqi City	20.01	24.9	26.9	23.9	25.3	25.4	21.21	25.47	24.22	34.25	34.8	36.2	37	37.9	38.5	40.3	40.9	41.8	41.9
Karamay City	25.49	39.6	31.1	34	36.5	36.5	39.81	42.83	42.26	42.77	42.9	42.91	42.92	42.93	43.04	43.33	43.08	43.05	43.29
Turpan City	31.24	32.1	39.4	43.2	43.2	43.5	22.41	30	29.95	29.975	25.5825	21.19	17.75	33.76	36.01	40.31	40.82	38.49	39.655
Hami City	35.03	35.6	36.2	36.8	38.6	34.9	34.87	37.71	40.18	41.38	41.12	42.65	43.37	42.94	40.57	38.09	39.23	39.08	39.155
Changji Hui Autonomous Prefecture	30.35	26.1	30.9	32.7	32.6	34	31.71	34.86	38.58	38.81	38.81	35.67	39.12	39.12	39.15	39.26	37.79	39.79	38.79
Counties (Cities) Direct Under Ili Prefecture	42.79	31.7	39.7	40.1	40.1	39.59	39.88	40.46	38.11	39.03	39.08	39.3	39.51	41.15	41.23	37.63	37.49	36.27	36.88
Tarbagatai Administrative Offices	32.31	32.2	31.2	34.2	34.3	34.2	29.96	35.8	38.19	38.48	38.62	39.13	39.35	40.94	40.67	41.89	40.475	39.06	39.7675
Altay Administrative Offices	34.03	34.4	35.2	35.4	35.9	35.9	34.77	33.71	35.97	35.5	37.48	45.67	18.13	16.03	37.5	37.69	38.185	38.68	38.4325
Bortala Mongolian Autonomous Prefecture	27.1	28.6	32.8	34.7	35.9	36.5	34.69	30.72	33.53	35.14	33.76	33.6	28.63	31.07	30.57	36.16	33.9	37	35.8166
Bayangol Mongol ian Autonomous Prefecture	33.18	33.7	35.2	36.4	39.1	39.5	37.71	38.1775	38.4188	38.66	36.01	35.36	35.685	34.35	35.11	34.73	34.92	34.825	34.8725
Aksu Administrative Offices	36.26	37.3	36.7	37.6	38.4	38.9	39.47	38.6	41.22	41.56	40.91	39.87	40.26	32.45	34.47	33.46	35.355	37.25	36.3025
Kizilsu Kirgiz Autonomous Prefecture	20.59	18.1	22.4	22.6	23.3	25.7	26.76	25.7	27.77	28.98	24.59	25	24.59	31.25	29.87	30.985	32.1	32.9297	33.9866
Kashgar Administrative Offices	20.88	30.1	29.2	33	24.97	25.09	25.09	25.09	27.57	31.9	31.79	29.27	30.62	28.045	25.47	25.64	27.09	26.365	26.7275
Hotan Administrative Offices	29.1	29.1	26.6	21.2	22.08	22.38	23.98	22.72	23	23.05	21.81	21.32	20.28	19.38	19.38	17.46	12.27	16.4	14.335

## Sheet: arbon emissions per 10 thousand
Carbon emissions per 10 thousand yuan GDP
	2000	2001	2002	2003	2004	2005	2006	2007	2008	2009	2010	2011	2012	2013	2014	2015	2016	2017	2018
Urumqi City	11.3209	11.7289	11.4111	11.0709	10.8717	10.8754	10.6812	10.067	10.1694	9.84836	9.86527	9.87327	8.76991	7.53153	7.12911	5.8143	5.0239	5.4975	5.36613
Karamay City	20.4293	20.2167	19.826	20.1357	21.1929	21.4422	18.7771	17.3799	16.8806	18.5571	20.425	20.6526	20.2691	20.5099	21.3799	18.6612	19.4244	17.8809	17.0732
Turpan City	3.69804	2.66049	2.28908	2.14339	2.77943	3.21842	3.60461	5.03763	6.02191	6.55872	9.43347	11.5512	12.1618	12.9636	11.6195	9.5979	11.46	15.0381	15.2068
Hami City	5.82532	5.86242	6.0766	6.32244	7.5089	7.26005	7.72797	7.12499	6.77799	8.03635	7.95291	8.50559	9.81075	15.6389	23.8071	16.8032	18.2838	15.7065	19.0944
Changji Hui Autonomous Prefecture	5.93163	5.2754	4.91189	5.05237	5.80598	4.88125	4.90676	5.22628	6.30703	7.30875	8.48442	9.961	9.71574	13.1982	14.8676	15.6644	15.547	15.1014	14.1992
Counties (Cities) Direct Under Ili Prefecture	3.01228	3.77241	3.94541	3.50027	3.73879	4.43868	5.38951	5.4431	5.21743	5.83561	6.62641	6.36372	6.3744	8.24609	8.7471	5.69482	5.77778	5.72329	5.33426
Tarbagatai Administrative Offices	1.84474	1.82159	2.16785	2.25071	2.33468	2.08379	2.18907	2.21685	1.95697	1.68235	2.42121	2.52682	2.78205	2.6692	2.74441	1.87389	1.73624	1.9032	1.76499
Altay Administrative Offices	2.35418	2.21983	2.07986	1.71112	1.50875	1.90735	1.73203	2.1559	2.2771	2.43954	2.74715	3.19918	1.98377	2.02765	3.12519	2.02737	2.58196	3.04665	3.10313
Bortala Mongolian Autonomous Prefecture	2.39093	2.28734	2.34288	2.11046	2.66425	2.3073	1.62157	1.86491	2.20954	2.75784	2.93971	2.5658	2.36807	2.83998	2.59517	1.77499	1.91545	2.01408	1.80981
Bayangol Mongol ian Autonomous Prefecture	3.65562	5.40948	4.2683	6.00873	5.1287	4.23896	4.51077	4.20262	4.39808	5.00064	5.40529	5.48494	5.59654	6.60447	5.5598	4.60659	4.55927	5.22293	5.23254
Aksu Administrative Offices	2.13633	2.43888	3.26711	3.26641	3.72615	6.28983	7.1101	7.66688	6.63063	7.14847	7.45267	8.7016	8.67727	9.21935	9.63529	7.01349	5.75757	5.97396	5.8745
Kizilsu Kirgiz Autonomous Prefecture	2.34392	0.760943	0.889363	0.770218	1.26579	0.155369	0.20439	0.262089	0.394022	0.451848	1.72383	2.26113	2.7999	3.40125	2.26647	1.97324	2.60033	2.38959	1.50813
Kashgar Administrative Offices	0.87597	0.69326	0.931053	0.969975	1.05579	1.29079	1.18341	1.27546	1.24117	1.23307	0.992647	1.09965	1.0661	1.02722	0.741787	0.913229	0.768367	0.756862	0.714739
Hotan Administrative Offices	1.72777	1.22226	1.1459	0.964944	1.03893	0.916678	0.955113	1.19986	1.08968	1.20437	1.08073	0.888983	0.827819	1.14525	0.958889	1.26398	1.05205	0.900808	1.03506
