# Supplementary material for: Decarbonization, Environmental Regulation, and Economic Boom: An Indicator Assessment Based on the Industrial Waste
Source: Frontiers journal article supplement (doi:10.3389/fenrg.2021.838852), 2022-02-03
Supplement: Data_Sheet_2.ZIP [file Innovation development data.xlsx]

## Sheet: Population with college degree 
Population with college degree or above per 10 thousand people
	2000	2001	2002	2003	2004	2005	2006	2007	2008	2009	2010	2011	2012	2013	2014	2015	2016	2017	2018
Urumqi City	16427	23586	23119	29623	29759	31444	37392	39241	46619	63024	69874	63112	62160	63458	63759	58765	56724	56878	56777
Karamay City	1287	471	674	610	522	630	1285	2256	2373	2358	1874	1604	1402	1533	1611	1465	1674	1737	2707
Turpan City	358	297	720	785	433	361	216	234	164	1013	718	926	1048	726	778	946	909	617	756
Hami City	641	418	746	782	665	306	304	254	234	563	622	537	558	1005	1069	1179	1039	855	951
Changji Hui Autonomous Prefecture	2010	830	1680	2497	3384	2993	4589	6496	7922	7130	7154	9894	10040	10151	9837	11296	10047	10390	10517
Counties (Cities) Direct Under Ili Prefecture	2373	3112	3398	3311	3270	3555	3452	3321	4590	6481	7846	5991	6498	7196	6769	7625	7556	8533	9598
Tarbagatai Administrative Offices	873	515	720	787	252	389	122	80	188	581	667	814	691	766	999	1040	997	862	1001
Altay Administrative Offices	412	347	509	529	638	93	234	304	211	692	1286	2004	2201	2044	1753	1598	859	791	874
Bortala Mongolian Autonomous Prefecture	321	380	797	372	100	141	136	224	625	647	657	520	584	224	98	193	352	349	501
Bayangol Mongol ian Autonomous Prefecture	931	764	1311	1215	1583	1526	1079	1292	2042	3137	4692	4759	4949	5998	5775	5161	4471	6119	6602
Aksu Administrative Offices	1340	1913	1407	1593	2167	1430	1643	602	1402	3593	4443	3397	3758	5464	3209	3303	3650	6049	8821
Kizilsu Kirgiz Autonomous Prefecture	331	376	532	606	619	319	256	249	195	120	242	158	353	535	756	668	382	798	512
Kashgar Administrative Offices	2455	2436	4521	5591	4877	3684	4017	4153	4577	9360	9591	6991	9873	10699	10257	9346	9351	16728	16028
Hotan Administrative Offices	1420	1344	1596	2233	3365	1797	1718	1487	2115	2661	4060	3688	9503	10412	7032	8574	7852	10892	11596

## Sheet: R&D expenditure as a percentage
R&D expenditure as a percentage of GDP
	2000	2001	2002	2003	2004	2005	2006	2007	2008	2009	2010	2011	2012	2013	2014	2015	2016	2017	2018
Urumqi City	0.383298	0.288783	0.373339	0.364504	0.395593	0.348252	0.30632	0.295645	0.590798	0.632255	0.611058	0.574771	0.691644	0.821469	0.873959	0.881677	1.01233	0.833575	0.87756
Karamay City	1.23055	0.968221	1.02095	0.59837	0.852307	0.97349	0.828473	0.858716	0.634386	1.16415	0.783942	0.748007	1.25467	0.699466	1.12263	1.15691	0.812818	0.772769	0.616675
Turpan City	0.0489973	0.0497713	0.0534524	0.0512971	0.0152248	0.0103528	0.096676	0.127945	0.187897	1.05909	0.81531	0.841281	1.15299	1.11681	0.928773	0.976956	0.749472	0.456526	0.267097
Hami City	0.0183324	0.045712	0.0429369	0.0385699	0.0213889	0.0115208	0.021382	0.02772	0.0118995	0.120553	0.0776322	0.0733151	0.0740685	0.0936661	0.0585903	0.107933	0.168128	0.10237	0.121994
Changji Hui Autonomous Prefecture	0.0251545	0.0550571	0.0175959	0.0464293	0.0146822	0.0267072	0.53108	0.232558	0.151385	0.245776	0.356472	0.410446	0.461939	0.533243	0.305549	0.348111	0.419904	0.633841	0.530482
Counties (Cities) Direct Under Ili Prefecture	0.0882125	0.0432956	0.0369192	0.063158	0.0626252	0.116898	0.0577599	0.0601724	0.0595742	0.135407	0.0982383	0.0956609	0.159182	0.311306	0.158053	0.206518	0.27729	0.149066	0.153484
Tarbagatai Administrative Offices	0.00476377	0.00431262	0.00185834	0.0020783	0.00277732	0.0141004	0.00238313	0.00470791	0.0136287	0.176639	0.119328	0.124066	0.0228328	0.0380911	0.0706088	0.0586896	0.0491286	0.0410627	0.0535303
Altay Administrative Offices	0.0141256	0.00606835	0.00814892	0.00860118	0.0157831	0.0738667	0.00905544	0.00271957	0.00399502	0.0414012	0.0208605	0.0200689	0.0373082	0.0459949	0.0505461	0.0661252	0.0827015	0.0364952	0.0515476
Bortala Mongolian Autonomous Prefecture	0.0322289	0.0619097	0.0547885	0.109062	0.0884576	0.0468808	0.0714028	0.0982589	0.0150758	0.017532	0.015646	0.00863498	0.0102103	0.0422378	0.0468827	0.0423965	0.0441439	0.0107987	0.0182591
Bayangol Mongol ian Autonomous Prefecture	0.00753158	0.00615461	0.0415792	0.215473	0.0125941	0.00629436	0.0170344	0.0081023	0.530324	0.456329	0.55762	0.553871	0.34916	0.401051	0.245574	0.271425	0.319683	0.377595	0.319913
Aksu Administrative Offices	0.0308017	0.0193757	0.0234288	0.0278548	0.016816	0.0122339	0.0515292	0.114414	0.0399461	0.214389	0.160112	0.153023	0.0814212	0.099699	0.215561	0.172271	0.148204	0.0577629	0.0639534
Kizilsu Kirgiz Autonomous Prefecture	0	0	0	0	0	0	0	0.00421706	0.00614268	0.242122	0.16054	0.166719	0.111812	0.0945792	0.0614385	0.0601821	0.0653534	0.0466316	0.0456197
Kashgar Administrative Offices	0.000225355	0.000605136	0.000541027	0.00344297	0.00714901	0.00533667	0.00479903	0.0754226	0.0495042	0.223159	0.16978	0.181662	0.123288	0.107177	0.0970231	0.0886767	0.0941833	0.0796607	0.0789672
Hotan Administrative Offices	0.00921557	0.0101643	0.00594318	0.0189162	0.00465299	0.0260336	0.0352349	1.65913	0.0327415	0.0576881	0.0517341	0.044086	0.0396708	0.0340112	0.0254157	0.0222984	0.022828	0.0117056	0.0118526

## Sheet: R&D personnel accounted for the
R&D personnel accounted for the proportion of employed personnel
	2000	2001	2002	2003	2004	2005	2006	2007	2008	2009	2010	2011	2012	2013	2014	2015	2016	2017	2018			N=5
Urumqi City	0.262365	0.190982	0.334287	0.306802	0.287807	0.299539	0.230245	0.24611	0.284844	0.386792	0.385175	0.417835	0.512551	0.504875	0.454327	0.439741	0.454939	0.385547	0.403552
Karamay City	0.711126	0.725275	0.707143	0.903185	1.22965	1.48626	1.26925	1.30823	1.00298	1.46504	1.3596	1.34874	0.88521	0.846024	0.814283	0.783893	0.672587	0.746	0.670796
Turpan City	0.0168923	0.0190661	0.0290655	0.0232941	0.0121728	0.0106476	0.0765938	0.142317	0.0350533	0.0723339	0.0848221	0.0850986	0.177745	0.224247	0.197323	0.160104	0.156567	0.140065	0.11815
Hami City	0.0227378	0.00977778	0.0117008	0.00868432	0.00954033	0.00399113	0.0109991	0.0170743	0.0290568	0.0844521	0.0774244	0.0920774	0.0718719	0.0648002	0.0609533	0.0556449	0.0623095	0.0594005	0.0584327
Changji Hui Autonomous Prefecture	0.013527	0.0094846	0.0111301	0.0156936	0.010256	0.0121889	0.0659641	0.0586877	0.0548201	0.0737063	0.0691141	0.0694283	0.121238	0.096939	0.0805723	0.0646821	0.0676914	0.0785954	0.0636412
Counties (Cities) Direct Under Ili Prefecture	0.0180213	0.0154302	0.0187661	0.0255527	0.0267417	0.0298001	0.0281339	0.0268162	0.0292926	0.0472356	0.0425163	0.0466552	0.049325	0.0716098	0.0590565	0.0489227	0.0620505	0.0604541	0.0567403
Tarbagatai Administrative Offices	0.00741982	0.00546695	0.00461957	0.00236686	0.00234375	0.00796591	0.0025436	0.00470588	0.00373665	0.0612281	0.0466216	0.0578169	0.0182708	0.0205854	0.0222849	0.0239253	0.0223716	0.0216208	0.0226897
Altay Administrative Offices	0.0105335	0	0.00200463	0.00289981	0.00694306	0.018491	0.00526364	0.000844573	0.00157917	0.0352529	0.0222935	0.0260424	0.0328796	0.0279969	0.0297093	0.0323537	0.028134	0.0242065	0.0249732
Bortala Mongolian Autonomous Prefecture	0.0125457	0.0158631	0.0185	0.0214286	0.0175879	0.0213489	0.029731	0.0704556	0.0194444	0.0614679	0.0624008	0.0669829	0.0489431	0.0501628	0.0537343	0.0571655	0.0466431	0.0466026	0.046297
Bayangol Mongol ian Autonomous Prefecture	0.013302	0.009756	0.0147777	0.0369098	0.0158412	0.01596	0.0189956	0.0221101	0.124417	0.0871695	0.126371	0.142622	0.165787	0.12203	0.130633	0.139496	0.116154	0.0872007	0.0926352
Aksu Administrative Offices	0.0141844	0.00912499	0.0135723	0.0153576	0.0161646	0.025006	0.0377873	0.0204988	0.0272336	0.0447668	0.0343723	0.0320592	0.0359734	0.0367034	0.0399782	0.0430038	0.0373736	0.024493	0.028506
Kizilsu Kirgiz Autonomous Prefecture	0	0	0	0	0	0	0	0	0.00206186	0.0305825	0.024048	0.0295264	0.025	0.0169672	0.0113692	0.00623693	0.00912267	0.00575791	0.00699645
Kashgar Administrative Offices	0	0.000313623	0.000268817	0.00361217	0.00334875	0.00372139	0.00152267	0.00934714	0.0179079	0.00717164	0.0158668	0.0164022	0.010271	0.0118509	0.0112844	0.0107674	0.0104489	0.0108742	0.0102957
Hotan Administrative Offices	0.000898957	0.00223701	0.000154321	0.00330033	0.000158479	0.000740521	0.00292826	0.0355826	0.00452617	0.00957592	0.00839701	0.00710605	0.00605917	0.00407206	0.00330683	0.00258296	0.00522683	0.00117199	0.00232925
