# Supplementary material for: Decarbonization, Environmental Regulation, and Economic Boom: An Indicator Assessment Based on the Industrial Waste
Source: Frontiers journal article supplement (doi:10.3389/fenrg.2021.838852), 2022-02-03
Supplement: Data_Sheet_2.ZIP [file Open development data.xlsx]

## Sheet: Total imports and exports as a 
Total imports and exports as a percentage of GDP
	2000	2001	2002	2003	2004	2005	2006	2007	2008	2009	2010	2011	2012	2013	2014	2015	2016	2017	2018
Urumqi City	19.4418	11.3929	11.95	18.668	28.2458	34.8506	29.1166	34.9912	35.5912	23.1342	30.2706	34.5093	32.7872	21.9315	20.6735	13.8264	13.2387	16.8385	16.565
Karamay City	2.7645	2.75797	2.43583	2.64494	1.81854	1.66032	1.18754	1.72176	1.29206	2.57728	2.66534	3.77754	1.86067	5.65356	3.70672	0.942049	1.40918	0.830248	0.981328
Turpan City	1.59509	0.592327	0.213895	0.343712	0.458926	0.138838	0.225342	0.244881	0.261959	0.473738	0.344796	0.8908	0.897129	2.2024	0.883967	1.25389	0.643435	0.234128	0.691155
Hami City	10.7433	12.4407	6.74211	8.46341	4.5554	3.20756	5.62494	4.95382	3.45788	3.24473	0.87235	0.764525	0.617489	1.51381	6.18069	6.37247	8.97993	1.62784	1.58551
Changji Hui Autonomous Prefecture	13.4872	6.17739	12.4722	20.2512	12.1299	24.226	35.7792	58.3336	64.866	34.8146	25.1883	19.4182	16.2667	10.4211	8.27981	7.77965	6.77564	3.63418	4.36995
Counties (Cities) Direct Under Ili Prefecture	35.7785	14.0312	20.8955	58.7919	58.3462	90.8637	90.2745	83.366	151.541	75.899	80.9808	72.7787	62.4049	68.2522	65.4536	36.1417	38.3415	39.0744	37.4897
Tarbagatai Administrative Offices	21.265	19.1296	15.4187	50.4759	29.9742	35.9553	26.2322	30.2125	26.7817	20.0796	12.9003	8.30316	5.81911	13.6753	9.07695	4.04247	6.70201	9.50315	6.13496
Altay Administrative Offices	24.1312	15.2945	14.8071	61.2288	20.7707	6.11998	2.89939	4.10682	16.4987	27.1744	34.4317	33.8875	30.5084	32.571	42.1906	24.2907	29.0139	29.7943	22.2275
Bortala Mongolian Autonomous Prefecture	160.805	137.603	229.043	283.178	361.898	255.062	201.436	168.948	173.208	74.2158	31.4374	68.7604	83.6735	75.2512	52.0494	47.1595	25.7456	30.8487	27.3642
Bayangol Mongol ian Autonomous Prefecture	3.5495	2.79945	2.51236	1.52374	1.48062	0.685894	1.77934	3.96346	5.4115	1.5608	1.27726	1.3317	1.1607	1.15891	1.20736	2.21338	2.8873	2.59938	1.45634
Aksu Administrative Offices	0.108864	0.748352	0.0184012	0.0776547	0.264622	1.00985	0.849948	0.870697	2.13476	2.98014	4.48005	4.11014	5.70759	5.22847	4.62059	2.15935	1.29778	2.3087	1.85094
Kizilsu Kirgiz Autonomous Prefecture	29.7009	15.3842	9.01892	14.7191	32.6482	39.1445	47.6094	101.202	87.8527	31.5342	17.8955	20.9102	26.9608	34.3695	37.3622	17.553	20.1867	22.6357	8.31105
Kashgar Administrative Offices	7.03213	2.12269	1.32014	2.57894	4.52557	6.61586	23.6217	46.2084	55.4323	21.054	16.8209	15.4895	13.2142	20.1677	17.1255	12.5706	25.0201	25.2184	12.1758
Hotan Administrative Offices	10.7661	10.9343	4.55761	0.089468	1.82257	0.711983	0.407644	0.674492	4.88243	0.0539818	0.468318	0.22378	0.312443	0.456603	0.329067	0.260473	0.525121	0.25045	0.72266

## Sheet: The proportion of foreign capit
The proportion of foreign capital actually utilized in GDP
	2000	2001	2002	2003	2004	2005	2006	2007	2008	2009	2010	2011	2012	2013	2014	2015	2016	2017	2018
Urumqi City	0.408202	0.397736	0.364235	0.147469	0.364052	0.368153	0.958367	1.01432	0.139671	0.880584	0.254795	0.447215	0.554143	0.500414	0.456886	0.569777	0.068859	0.0192451	0.00288199
Karamay City	0	0	0	0.0229629	0	0.000849485	0	0.00044284	0	0	0	0.120848	0.133929	0.12644	0	0	2.53607	0	0
Turpan City	0.0332021	0	0.12496	0.109757	0	0.346069	0	0.0167969	0.0517706	0.0251894	0	0	0.0778082	0.0819309	0.00188983	0.154647	0	0	0.00191751
Hami City	0.141972	0.0245687	0.0287598	0.0138801	0.170709	0.108711	0.373764	0.0553823	1.20572	0.240603	0.922903	0.588231	0.54901	0.305767	0.214734	0.494714	0.00723751	0.0116797	0.062646
Changji Hui Autonomous Prefecture	0.21349	0.126878	0.00606839	0.385052	0.155447	0.128884	0.119858	0.154897	1.01828	0.450676	0.299779	0.333444	0.321891	0.295933	0.352956	0.196482	0.104271	0.0416164	0.00745321
Counties (Cities) Direct Under Ili Prefecture	0.00784862	0.0481376	0	0.0106831	0.32548	0.24348	0.08493	0.0559518	0.122813	0.407821	0.979614	0.209875	0.204692	0.164907	0.0677668	0.179722	0.711053	1.19726	0.192428
Tarbagatai Administrative Offices	0.00988381	0	0	0	0	0	0.0403704	0.00559359	0.00717873	0.0268617	0	0	0.0876333	0.0441646	0.0686488	0.000209966	0.931211	0	0.0753113
Altay Administrative Offices	0.0157669	0	0.153867	0	0	0	0	0	1.23971	0.0226948	2.03139	0.349819	0.426525	0.415913	0.437778	0.397547	0	0	0
Bortala Mongolian Autonomous Prefecture	0.0664241	0	0	0.00491936	0	0.0265869	0	0	0.861243	0.156298	0	0	0	0	0.00523542	0	0.113401	0	0
Bayangol Mongol ian Autonomous Prefecture	0	0.0761198	0.15357	0.287374	0.0869255	0.0090547	0.119842	0.00210771	0	0	0.186544	0.199449	0.198795	0.192512	0.161468	0.164041	0	0.18776	0
Aksu Administrative Offices	0.0885069	0	0.00849286	0.836945	0.344925	0	0.0287978	0	0.0574695	0	0	0.0747785	0.301328	0.304505	0.271534	0.0439648	0.169604	0	0
Kizilsu Kirgiz Autonomous Prefecture	0	0	0	0	0.0115507	0	0	0.234086	8.84098	0.483976	1.5254	0.888968	0.0113776	0	0.631146	0.354845	0.0953015	0.00853919	0.00821453
Kashgar Administrative Offices	0.016461	0.0450784	0.0134342	0.0629779	0.0893068	0.00481723	0.0271876	0.101504	0	0	0.0347904	0	0.0829724	0.0285043	0.027928	0.0804622	0	0.00129122	0.0137534
Hotan Administrative Offices	0	0	0	0	0	0	0	0	0	0	0	0.0228866	0	0	0	0.593048	0.046921	0	0

## Sheet: Proportion of international tou
Proportion of international tourism revenue in GDP
	2000	2001	2002	2003	2004	2005	2006	2007	2008	2009	2010	2011	2012	2013	2014	2015	2016	2017	2018
Urumqi City	2.03953	1.99309	1.90648	0.713008	0.82829	0.912428	1.06753	0.981415	0.607216	0.559983	0.988582	0.590796	0.626139	0.591007	0.349733	0.420512	1.02754	1.06246	0.418764
Karamay City	0.00896014	0.00289481	0.0028791	0.00179876	0.00465253	0.00759227	0.00421114	0.00280465	0.00252088	0.00298675	0.0041872	0.00362544	0.00973319	0.0118379	0.0176083	0.0332418	0.0396696	0.0445472	0.0331554
Turpan City	0.949028	0.795123	0.571506	0.227206	0.949074	0.44937	0.595356	1.09578	0.35066	0.443246	1.43807	1.15506	0.896091	0.344822	0.296231	0.359449	0.421065	0.441962	0.400759
Hami City	0.0171345	0.0363617	0.0467346	0.00211672	0.0933684	0.421474	0.4785	0.302536	0.240815	0.220684	0.368838	0.288268	0.284742	0.201124	0.0940795	0.109675	0.131755	0.117782	0.00554935
Changji Hui Autonomous Prefecture	0.00414544	0.00387441	0.0033983	0.00291692	0.00320267	0.00188769	0.00404017	0.000485569	0.000357857	0.000460814	0.00545936	0.0137825	0.0407183	0.0315962	0.028255	0.0412957	0.0488101	0.0559611	0.0788395
Counties (Cities) Direct Under Ili Prefecture	0.142396	0.195073	0.127551	0.100293	0.20942	0.416934	0.162139	0.122837	0.193639	0.210052	0.738524	2.2194	2.15162	2.17844	2.06627	2.29667	3.16365	3.46425	6.51135
Tarbagatai Administrative Offices	0.00593028	0.0126647	0.00777168	0.002738	0.0302156	0.0758811	0.108763	0.0149162	0.0300443	0.0247032	0.104739	0.094508	0.0875035	0.107615	0.0977005	0.127134	0.16974	0.190934	0.289218
Altay Administrative Offices	0.128763	0.0926713	0.201945	0.128565	0.178055	0.288658	0.177009	0.140928	0.0891407	0.0762312	0.367928	0.495741	0.677205	1.0574	0.984457	1.29217	1.57279	1.74557	0.510349
Bortala Mongolian Autonomous Prefecture	0.0184511	0.00849549	0.0120325	0.000885485	0.0176614	0.01641	0.0353389	0.015792	0.029128	0.0243581	0.285303	0.341886	0.30984	0.257677	0.248921	0.330217	0.417478	0.490161	0.0534865
Bayangol Mongol ian Autonomous Prefecture	0.0705727	0.018825	0.0196603	0.0169572	0.0452842	0.0353385	0.0252914	0.0308049	0.0196821	0.0211709	0.0365897	0.0478838	0.0881986	0.0685368	0.044965	0.0569977	0.07793	0.099553	0.00875877
Aksu Administrative Offices	0.00619549	0.0711693	0.0535333	0.0214845	0.152931	0.0946838	0.0222155	0.00821103	0.011443	0.00916639	0.0651115	0.0417279	0.0412495	0.0303253	0.0136791	0.0129896	0.0156622	0.0158024	0.014234
Kizilsu Kirgiz Autonomous Prefecture	0.00415833	1.12642	0.999735	0.173364	0.0438928	0.210984	0.525714	0.429691	0.845703	0.688087	2.95502	0.976385	0.828497	0.861227	0.513451	0.473749	0.544675	0.473071	0.0770112
Kashgar Administrative Offices	1.70865	0.963796	0.645882	0.475963	1.33462	0.337989	0.525789	0.520514	0.331821	0.277339	0.584479	0.54465	0.384967	0.202842	0.0583543	0.0608256	0.0746276	0.115806	0.0102593
Hotan Administrative Offices	0.0884966	0.166867	0.125709	0.0348925	0.386043	0.950951	0.265041	0.270991	0.290765	0.235978	0.381326	0.514694	0.390018	0.116587	0.0365286	0.0348539	0.0429875	0.0489735	0.00822927
