# Supplementary material for: Decarbonization, Environmental Regulation, and Economic Boom: An Indicator Assessment Based on the Industrial Waste
Source: Frontiers journal article supplement (doi:10.3389/fenrg.2021.838852), 2022-02-03
Supplement: Data_Sheet_2.ZIP [file Shared development data.xlsx]

## Sheet: Number of hospital beds per 10 
Number of hospital beds per 10 thousand people
	2000	2001	2002	2003	2004	2005	2006	2007	2008	2009	2010	2011	2012	2013	2014	2015	2016	2017	2018
Urumqi City	56.6	69.7	64.3	84.03	95.24	76.54	92.97	95.47	90.77	99.67	80.19	106.4	102.86	102.65	107.76	109.81	109.773	138.474	144.794
Karamay City	53.3	51.5	56.2	61.01	73.58	72.76	74.15	59.21	68.87	66.67	46.8	65.11	57.66	56.93	60.14	59.39	62.2003	66.363	68.8658
Turpan City	31.2	31.9	34.6	36.22	34.19	34.6	34.12	32.8	33.65	33.01	34.32	35.8	38.46	45.17	48.69	52.06	55.4923	62.3254	62.3619
Hami City	47	46.3	47.7	44.96	49.98	45.62	46.86	49.2	50.97	50.42	53.37	59.45	58.44	59.66	61.06	65.43	54.7187	55.3912	56.8824
Changji Hui Autonomous Prefecture	32	32.8	36.2	38.55	43.36	44.61	44.14	49.03	57.88	60.47	62.35	66.14	70.82	70.25	69.67	71.15	64.0971	65.9128	69.1325
Counties (Cities) Direct Under Ili Prefecture	28.8	31.7	33.5	34.06	34.16	34.35	35.6	37.72	39.54	43.18	50.24	48.14	52.91	54.58	55.8	59.71	50.1614	52.3089	54.122
Tarbagatai Administrative Offices	32.6	31.3	32.5	30.92	33.19	33.05	35.93	36.95	39.33	39.97	36.1	43	46.74	48.5	52.4	57.11	52.7977	53.7463	58.6801
Altay Administrative Offices	41.7	39.4	36.3	33.19	36.68	31.84	34.38	35.95	38.21	41.55	47.17	46.52	51.13	54.29	55.84	63.83	50.2976	52.561	52.6156
Bortala Mongolian Autonomous Prefecture	36.8	37.1	39.1	38.47	42.75	40.91	45.17	42.95	45.11	45.05	50.76	54.24	57.01	59.24	62.06	62.31	51.0888	58.0984	53.8976
Bayangol Mongol ian Autonomous Prefecture	47.9	47.3	42.4	44.93	45.16	46.89	48.2	53.21	53.92	56.62	61.53	59.56	60.17	63.15	65.78	66.75	64.7824	71.0626	77.4897
Aksu Administrative Offices	30.8	31.5	31	31.08	30.77	30.53	33.05	39.55	38.96	42.89	46.7	49.26	50.94	54.45	54.14	55.51	51.7681	56.6777	57.1456
Kizilsu Kirgiz Autonomous Prefecture	34.6	33.4	30.7	32.22	30.83	30.96	34.19	41.22	43.98	49.75	53.54	56.65	57.21	53.99	54.66	59.25	66.6114	62.5201	63.9712
Kashgar Administrative Offices	23.6	23.8	23.6	23.49	24.37	24.7	25.19	30.57	31.72	35.66	41.33	44.57	44.6	46.14	46.06	51.8	56.254	58.2683	58.3819
Hotan Administrative Offices	25.5	25.6	26.4	27.74	26.64	28.08	30.79	28.25	34.84	45.37	50.81	52.39	55.46	57.9	57.38	59.15	86.5622	67.104	68.6201

## Sheet: Years of education per capita
Years of education per capita
	2000	2001	2002	2003	2004	2005	2006	2007	2008	2009	2010	2011	2012	2013	2014	2015	2016	2017	2018
Urumqi City	9.76628	14.3999	14.6284	15.6367	15.9296	16.2562	16.9878	17.0835	18.4665	21.8825	22.5962	20.9692	20.0359	19.6078	19.7584	18.737	18.0845	22.1146	22.2073
Karamay City	9.63187	7.84777	7.83679	8.96041	9.32033	10.1022	11.5701	13.6476	13.9369	13.9129	13.5934	13.012	12.3544	12.5785	12.4083	11.9325	12.4775	12.5704	13.7683
Turpan City	7.58834	7.72518	7.99259	7.79188	7.64407	7.39822	7.05139	6.53103	6.27395	6.33814	6.04141	5.93423	6.11272	5.7432	5.61826	5.60189	6.04281	6.01694	6.30524
Hami City	8.584	8.11189	8.9433	8.91789	9.96179	9.73952	9.78769	9.62013	9.2848	9.22574	8.92833	8.35519	8.75428	8.96153	8.83806	8.93962	9.82445	9.86019	9.68005
Changji Hui Autonomous Prefecture	7.96935	7.70976	8.54876	8.99274	9.78329	9.84276	10.4116	11.5217	11.9096	11.7701	11.2824	12.4487	12.5295	12.7556	12.1488	12.8405	12.1272	12.011	12.1562
Counties (Cities) Direct Under Ili Prefecture	7.74085	2.43638	7.06939	7.32123	7.44592	7.65854	7.67448	7.53374	7.6335	7.82602	7.76164	7.26762	7.21958	7.17412	7.06955	7.10158	7.15583	7.68548	8.0326
Tarbagatai Administrative Offices	8.15274	8.0155	8.28222	8.3589	8.43962	8.54192	8.47319	8.51711	8.30109	8.12632	7.88144	7.84961	7.81301	7.53606	7.33243	7.57767	7.47997	7.24472	7.45563
Altay Administrative Offices	8.24921	8.0649	8.42649	8.36926	8.44579	8.01558	7.90056	7.49482	7.18485	6.80659	6.8827	6.80083	7.18739	6.98533	6.66782	6.81018	6.49551	6.46994	6.70797
Bortala Mongolian Autonomous Prefecture	8.13768	8.92091	9.2513	8.53063	8.20815	8.74898	8.75353	8.61409	8.62782	8.4844	7.94747	7.4939	7.69616	7.24374	6.84649	6.94895	7.2436	7.07566	7.33167
Bayangol Mongol ian Autonomous Prefecture	8.08929	8.38388	9.02713	8.86475	8.89488	9.61542	9.19991	9.54131	9.56827	9.49623	10.0712	9.25234	9.26713	9.6356	9.52545	9.29906	10.4753	11.533	12.1306
Aksu Administrative Offices	7.09833	7.81761	7.70561	8.07427	8.59872	8.74227	8.74228	8.91945	8.65639	8.15323	7.72132	7.40732	7.30895	7.44028	6.83711	7.03307	7.21283	8.03461	8.90503
Kizilsu Kirgiz Autonomous Prefecture	7.01128	8.0273	8.55929	9.25706	9.50397	9.59622	9.94706	9.05104	7.38143	7.41029	7.18881	6.53933	6.7609	7.07813	7.36303	6.9331	6.98453	7.44842	7.62469
Kashgar Administrative Offices	6.6638	7.32292	8.02281	8.63357	8.91952	8.73882	9.55702	10.0294	9.32449	9.18953	8.76765	7.89024	8.28253	8.5042	8.26892	8.07041	8.43212	9.7083	10.3038
Hotan Administrative Offices	6.18295	6.60287	6.78301	6.51505	7.13711	6.89177	6.74843	7.02204	7.3974	7.30028	6.85467	6.37972	7.15793	7.19436	6.19759	6.04871	5.85113	6.5057	6.93944

## Sheet: Social insurance coverage
Social insurance coverage
	2000	2001	2002	2003	2004	2005	2006	2007	2008	2009	2010	2011	2012	2013	2014	2015	2016	2017	2018
Urumqi City	19.8476	20.4142	35.982	40.1765	43.353	45.497	39.5981	42.5951	46.9961	44.2226	48.4972	55.3079	56.7255	58.4006	59.1063	60.4633	58.7935	85.5753	93.3942
Karamay City	72.6415	97.9487	59.0625	83.7895	78.7209	75.185	72.5356	64.509	64.2766	72.0354	74.693	77.5646	90.4268	94.9688	94.7255	94.2951	82.7047	90.5883	97.9202
Turpan City	10.6495	10.1843	11.3729	11.5901	11.6252	11.6623	13.4118	12.6641	13.6491	26.3308	29.0292	37.2621	41.7464	40.809	39.6625	35.1335	33.4658	79.4193	90.1695
Hami City	17.6798	20.3111	17.8855	19.3009	21.9428	24.9446	30.2933	30.5953	31.7836	23.2193	26.0076	35.0983	35.814	36.3388	36.5442	37.3894	33.1249	67.4982	71.0881
Changji Hui Autonomous Prefecture	20.5056	13.1439	17.2673	15.8675	18.9133	19.3385	19.5837	21.0361	23.0216	36.8112	39.7297	36.7003	37.5108	39.0484	40.317	41.3976	30.9283	66.6873	71.3226
Counties (Cities) Direct Under Ili Prefecture	13.7147	14.2386	15.0088	15.4365	16.1585	16.7132	17.4421	18.9191	19.7485	15.779	15.9744	27.7412	28.1599	28.1254	28.0642	28.2574	19.4764	60.2131	71.6361
Tarbagatai Administrative Offices	21.151	40.2105	24.0421	17.3669	17.3633	16.1541	16.4608	15.1674	15.4982	27.8772	28.1926	29.5695	30.1406	30.7095	31.2712	32.34	21.2447	65.5062	77.8953
Altay Administrative Offices	21.3516	24.6169	21.6808	23.7937	24.4023	25.5493	29.3448	27.9765	28.9186	24.7994	25.8057	37.6343	38.6702	39.0993	38.5738	38.5976	28.7656	69.6995	77.473
Bortala Mongolian Autonomous Prefecture	12.1309	13.4581	12.925	13.648	14.6281	15.0898	15.9981	17.5669	18.2407	17.3707	20.2759	29.0078	29.6864	29.3054	29.1861	30.3067	23.8731	58.8419	62.8917
Bayangol Mongol ian Autonomous Prefecture	10.9076	15.3598	18.7105	20.7763	22.6838	24.1342	26.3512	29.1152	29.9385	22.5505	23.539	34.3546	36.4385	38.3291	39.6276	40.2805	40.5964	73.1666	79.9538
Aksu Administrative Offices	10.1418	20.7459	10.2431	11.3945	12.3894	12.5856	12.4651	12.6175	12.9076	26.9741	26.8132	29.0796	29.2658	28.9937	28.2793	15.4011	18.7083	74.502	81.9235
Kizilsu Kirgiz Autonomous Prefecture	11.6242	12.0485	17.027	14.8656	16.2341	16.9071	16.4435	16.7222	17.1392	34.7573	34.4836	37.0319	39.0237	39.0068	37.8724	36.8514	19.0877	84.2055	94.103
Kashgar Administrative Offices	29.1385	8.75008	8.47222	9.99525	10.3384	10.2676	10.5239	10.6488	12.242	12.9533	27.4389	32.4676	35.1388	35.1744	34.6513	35.501	34.947	94.6132	96.0765
Hotan Administrative Offices	2.99272	11.6397	3.324	7.78787	7.92544	8.47502	8.74085	8.79572	9.26641	19.6122	20.7049	35.2513	35.447	35.3612	33.8019	32.1725	11.018	77.2265	82.9063

## Sheet: Total retail sales of consumer 
Total retail sales of consumer goods per capita
	2000	2001	2002	2003	2004	2005	2006	2007	2008	2009	2010	2011	2012	2013	2014	2015	2016	2017	2018
Urumqi City	6560.21	6608.13	7101.44	6849.51	7948.24	8732.61	9541.27	9485.56	10400.2	12259.5	11686.4	13063.7	14071.5	15918.5	17138.9	18137.9	22380.9	23383.4	22552.5
Karamay City	3899.44	3167.97	3518.09	2730.78	2351.54	2186.94	1879.86	2072.67	1649.84	2931.62	2575.49	2780.14	3319.73	3944.33	4336.6	7133	8377.95	7017.61	5774.39
Turpan City	1591.65	1549.2	2529.75	1535.92	2166.92	2239.18	2318.04	2260.73	2342.31	3325.37	3441.15	2728.33	3008.63	3226	3951.33	5974.98	6299.03	6307.71	6180.27
Hami City	2333.51	2431.97	2544.95	2580.12	2948.8	2757.17	3075.32	3500.93	3521.6	4384.58	4535.3	4975.33	5861.91	6599.1	7477.21	8755.33	10127.8	10000.4	9981.33
Changji Hui Autonomous Prefecture	1882.85	1977.97	2163.41	2142.74	2753.78	2959.4	3341.05	4123.16	4661.65	5632.28	5799.19	6283.64	7160.33	8533.1	10188	11843.9	13531.5	14734.7	14033.2
Counties (Cities) Direct Under Ili Prefecture	1257.73	1162.81	1305.61	1163.67	1382.33	1407.42	1543.31	1657.32	1821.36	2121.72	2200.6	2374.13	2709.3	2943.38	3318.04	3623.91	4382.55	4737.33	4932.34
Tarbagatai Administrative Offices	1524.15	1642.77	1768.78	1177.09	1191.74	1458.81	1571.15	1683.64	1822.5	2134.57	2087.27	2415.73	2710.75	3147.28	3633.76	4739.96	5583.04	6132.3	5966.55
Altay Administrative Offices	1697.26	1793.19	1927.02	2369.87	2279.83	2601.87	2577.8	2703.65	2816.48	3283.21	3479.33	3643.74	4083.5	4587.33	5168.71	6184.91	7720.7	7793.27	7697.93
Bortala Mongolian Autonomous Prefecture	1461.54	1626.81	1807.22	1509.47	1679.51	1516.88	1524.42	1596.38	1815.58	2043.26	1833.87	2048.45	2319.2	2730.57	3097.74	3604.66	4288.97	4794.51	5235.03
Bayangol Mongol ian Autonomous Prefecture	2504.68	2647.05	2799.41	2274.79	2936.81	1928.08	1611.61	1741.4	1733.3	2159.46	2202.31	2231.53	2523.03	2531.79	2604.45	3363.43	4344.2	4702.89	5070.33
Aksu Administrative Offices	884.965	952.769	1024.96	1072.39	1370.98	1571.08	1532.53	1661.2	1917.45	2093.46	1844.96	2045.89	2285.77	2713.7	2997.75	3117.65	3733.03	3975.01	4004.44
Kizilsu Kirgiz Autonomous Prefecture	534.269	549.808	579.214	611.498	740.895	646.781	706.45	752.893	830.512	878.136	968.239	1016.03	1117.48	1215.57	1375.04	1550.08	1809.01	1775.6	1847.12
Kashgar Administrative Offices	504.973	529.317	553.669	650.516	742.034	860.826	1005.88	1207.37	1344.78	1604.03	1451.34	1810.64	2071.19	2504.81	2500.25	2692.4	3196.08	3228.98	3461.6
Hotan Administrative Offices	305.541	296.222	297.072	294.862	593.043	454.705	548.166	610.628	658.106	677.081	692.274	706.941	751.058	783.549	824.154	841.649	919.957	960.104	948.67
